# Supplementary material for: Synthesis and Biological Activity of N-acyl Anabasine and Cytisine Derivatives With Adamantane, Pyridine and 1,2-azole Fragments
Source: Preprints.org preprint supplement (doi:10.20944/preprints202210.0368.v1), 2022-10-24

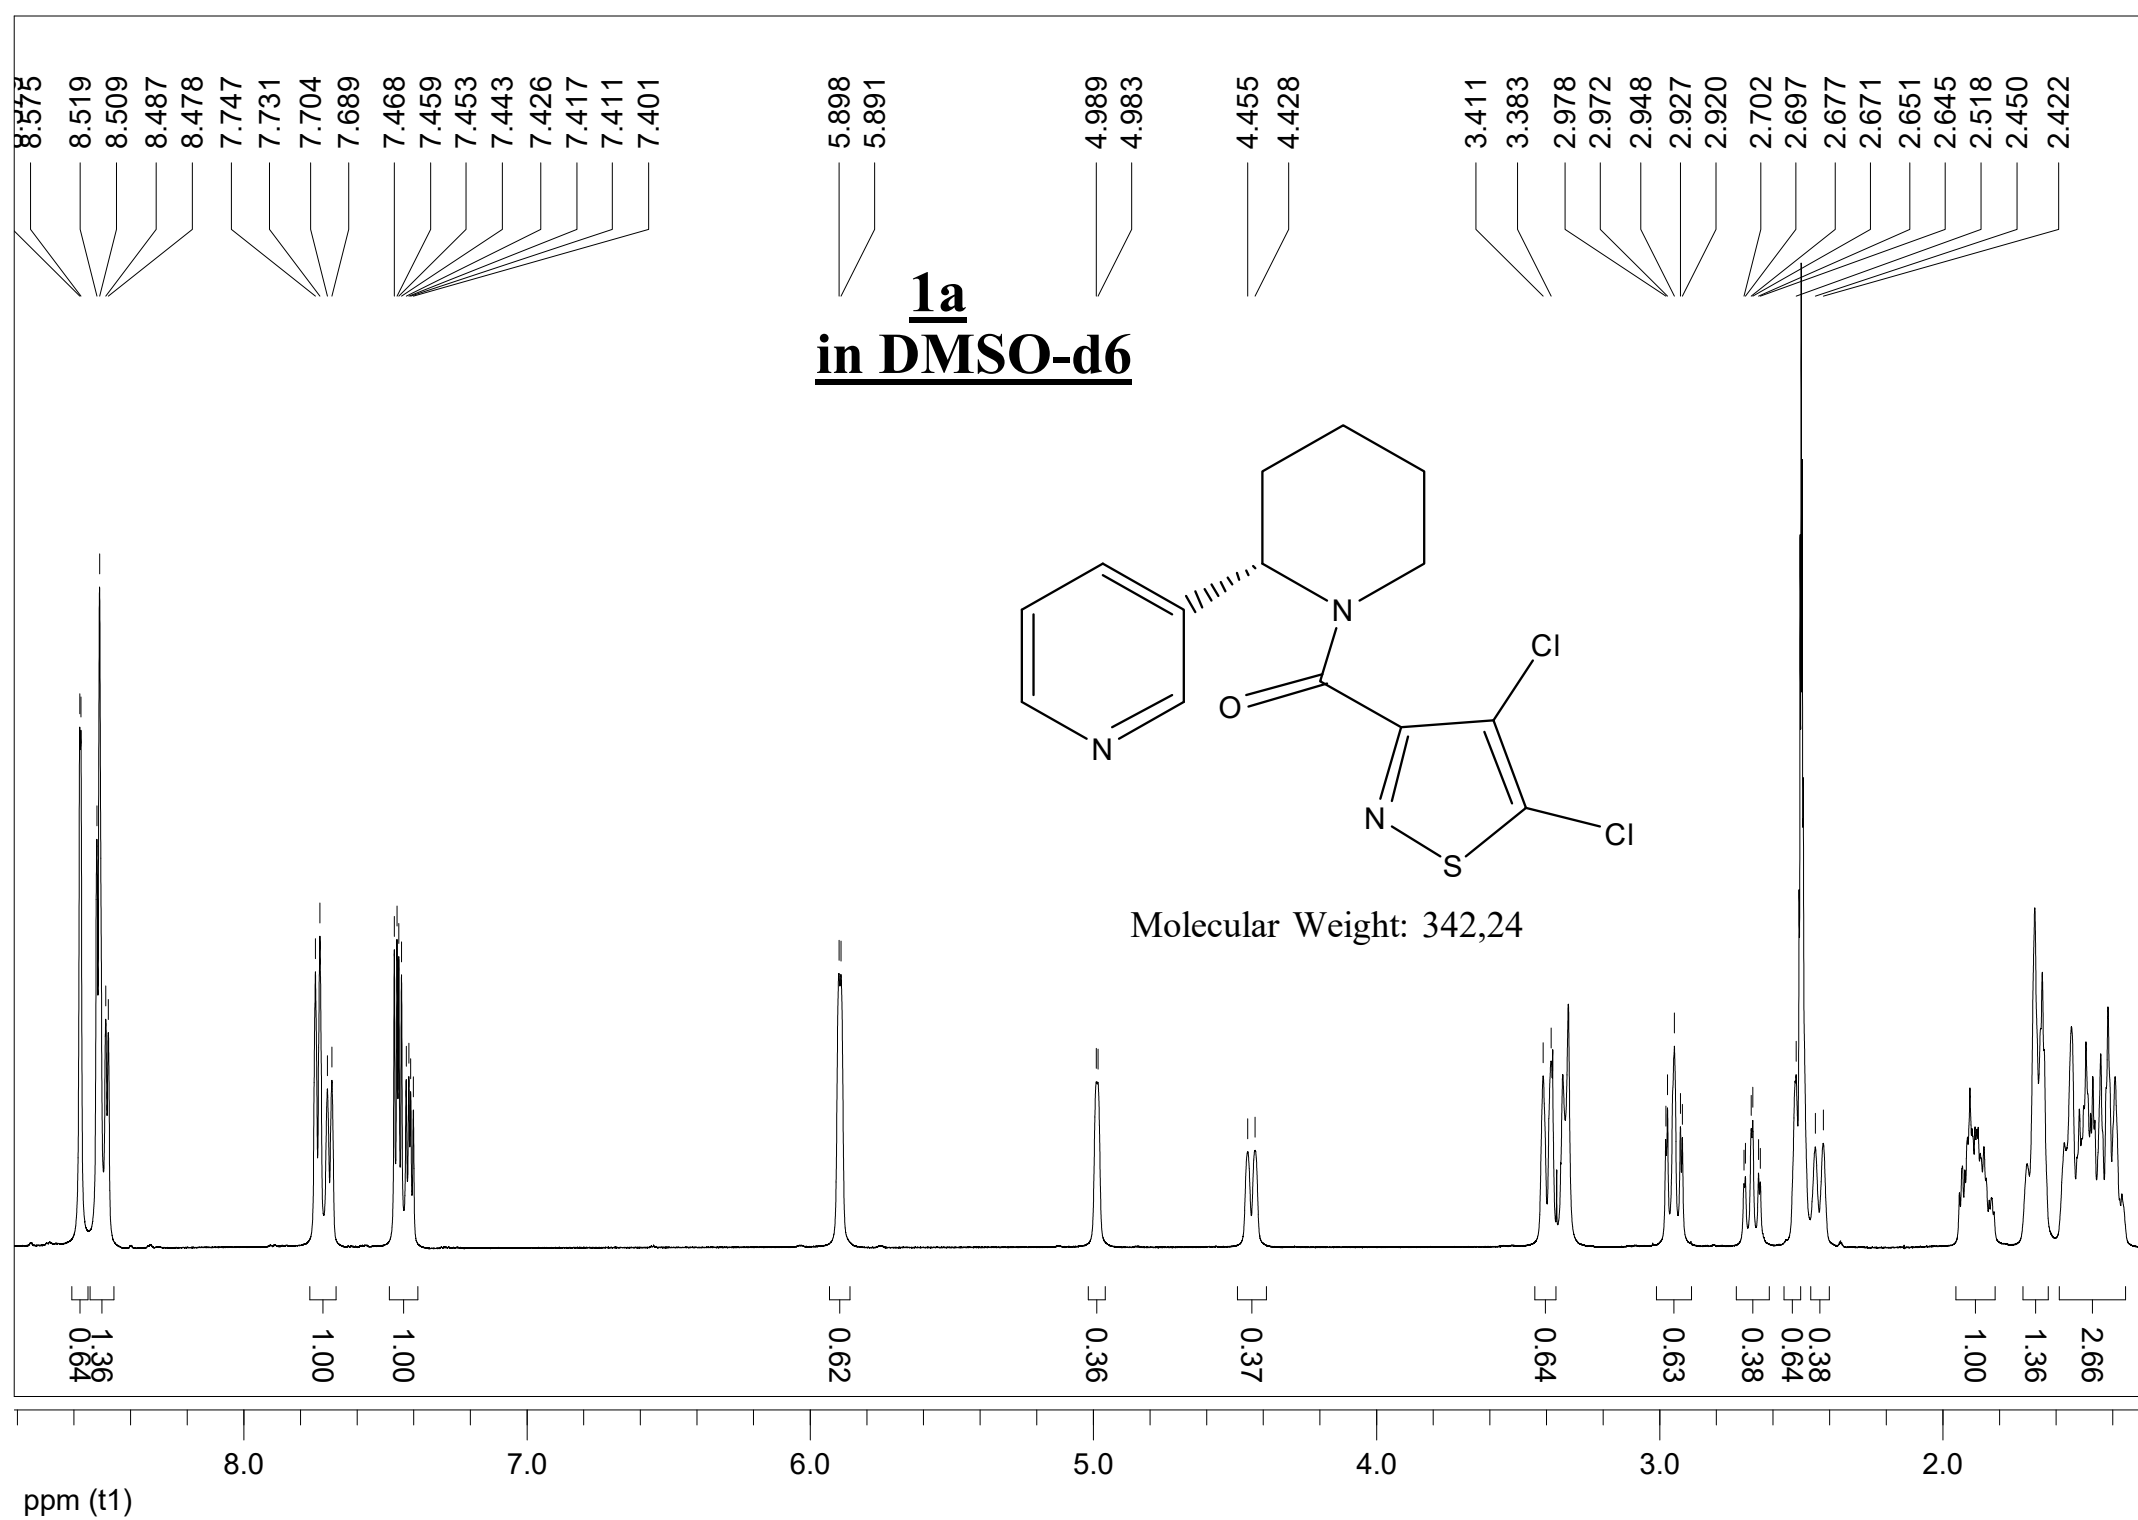

**1a (13C, DMSO-d6)**

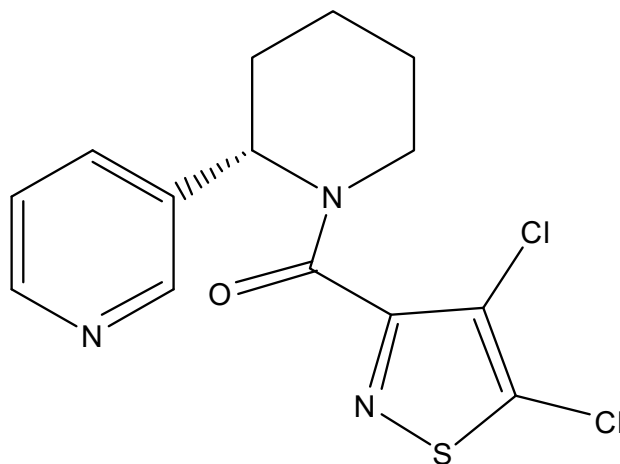

162.167  
162.065  
160.678

149.732  
149.586  
148.703  
148.568

135.035  
134.915  
134.352  
134.237

124.333  
124.176  
121.783  
121.649

55.388

50.120

43.717

38.646

28.772

27.452

26.082

25.530

19.650

19.579

150

100

50

ppm (t1)

**1a**  
**DEPT**

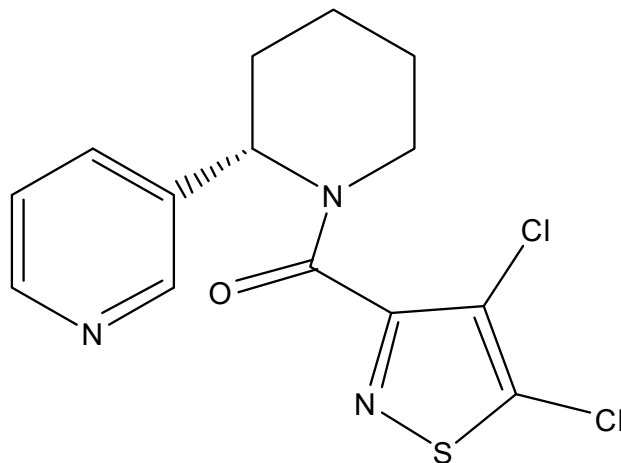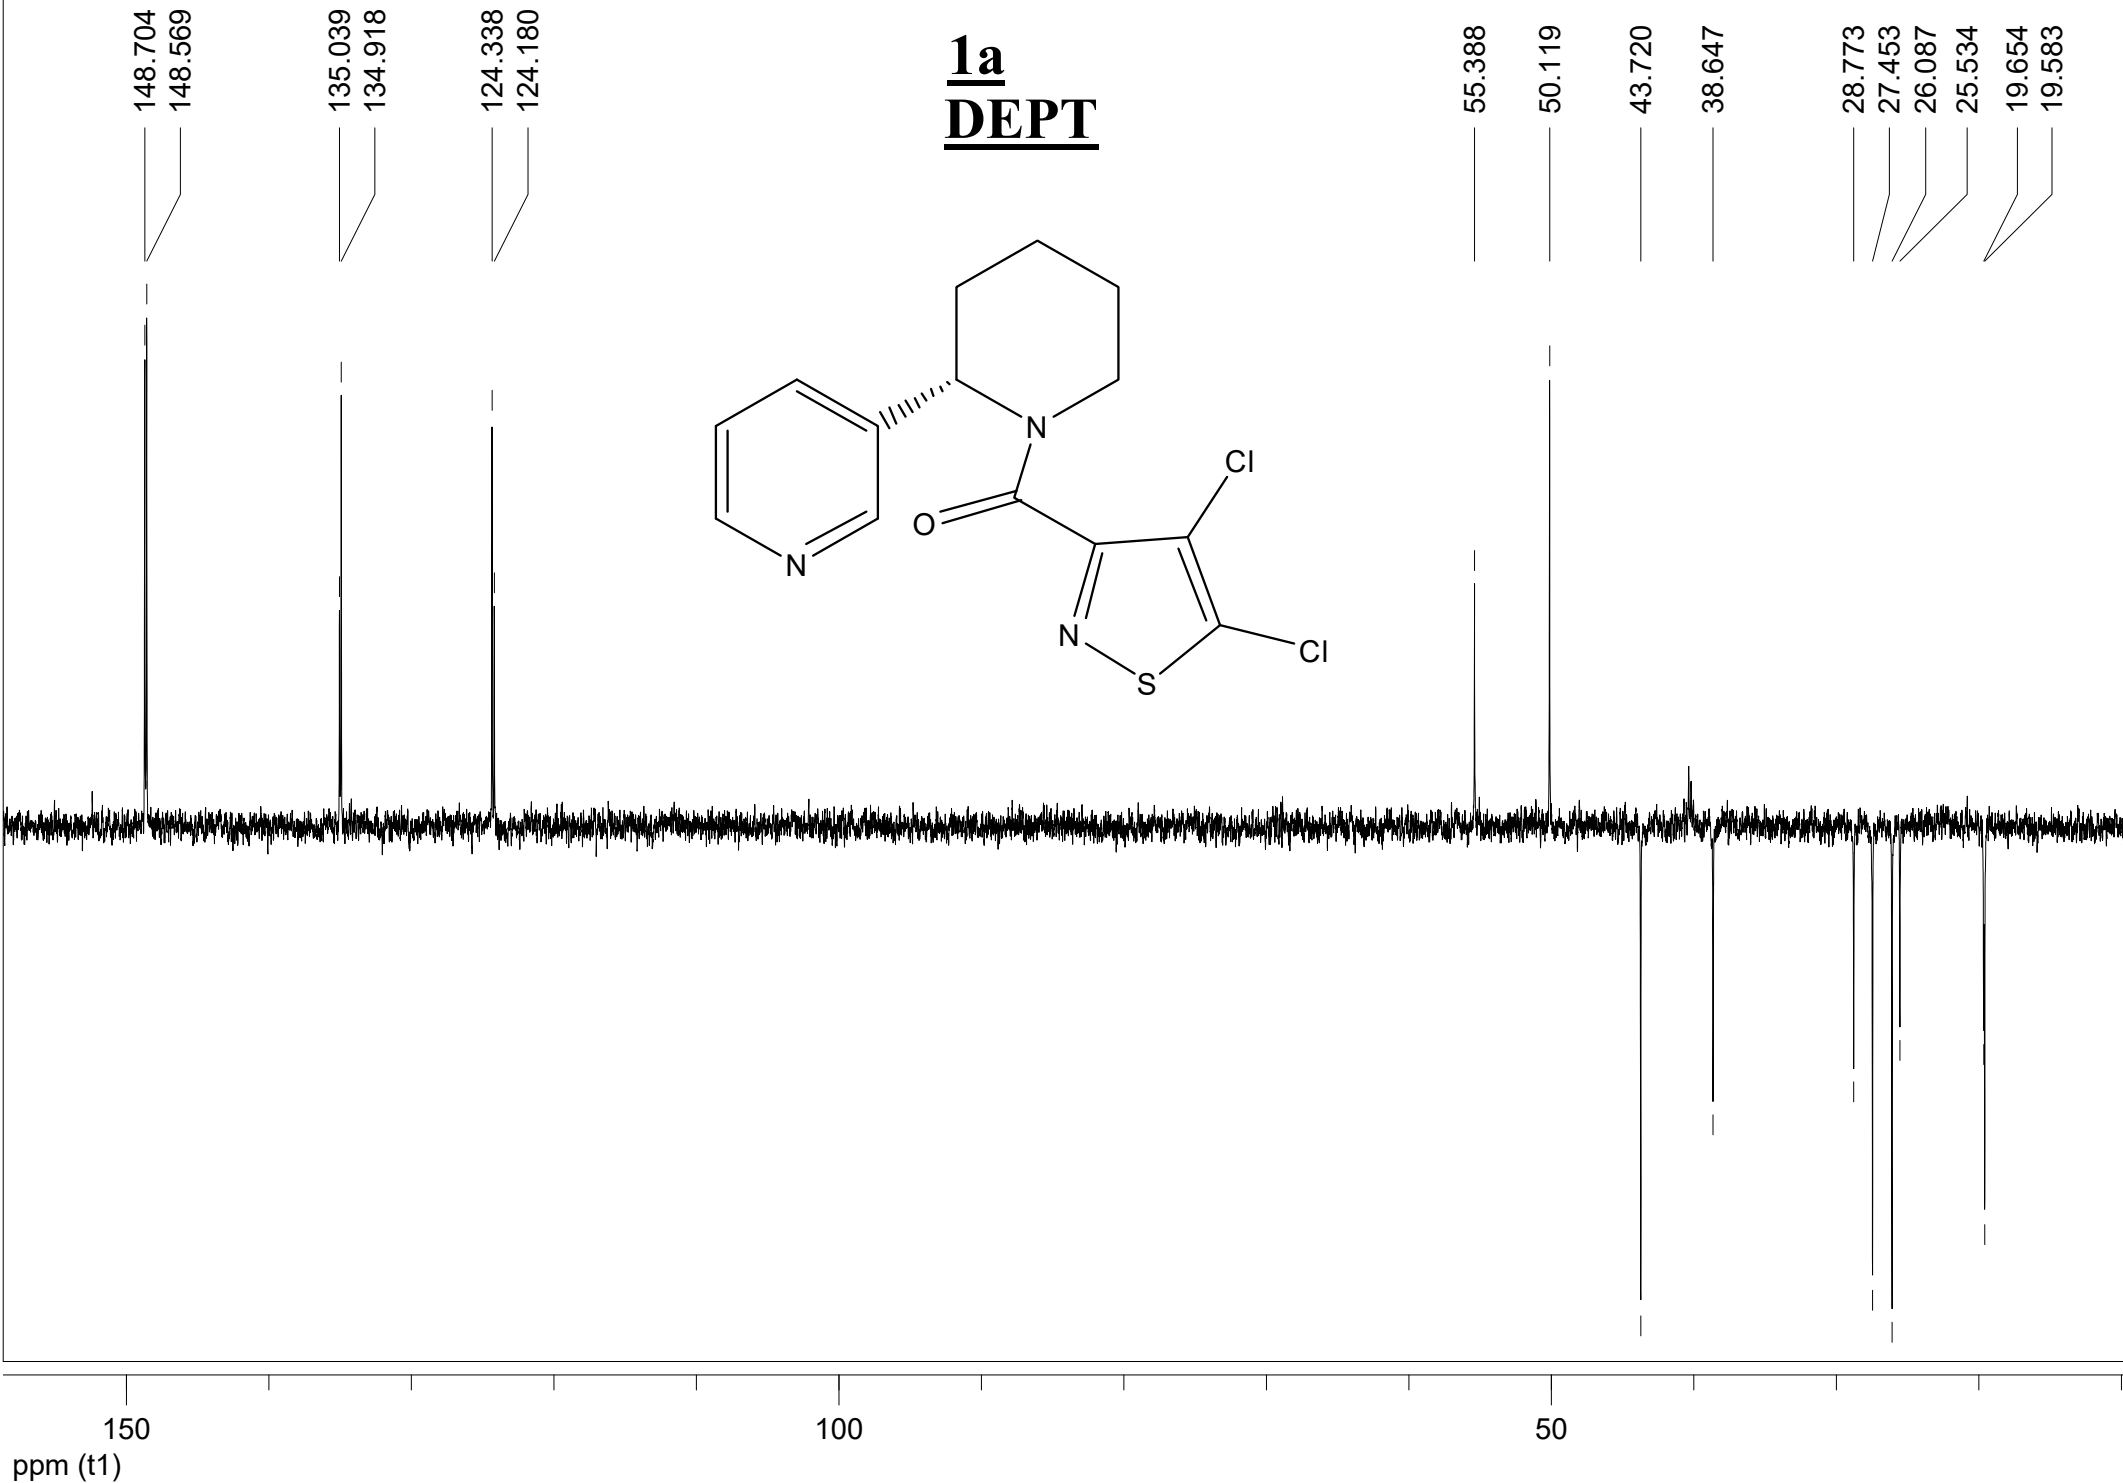

**in CDCl<sub>3</sub>**

**1b**

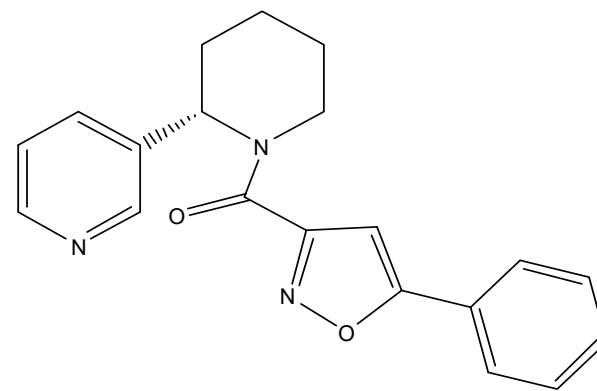

Molecular Weight: 333,39

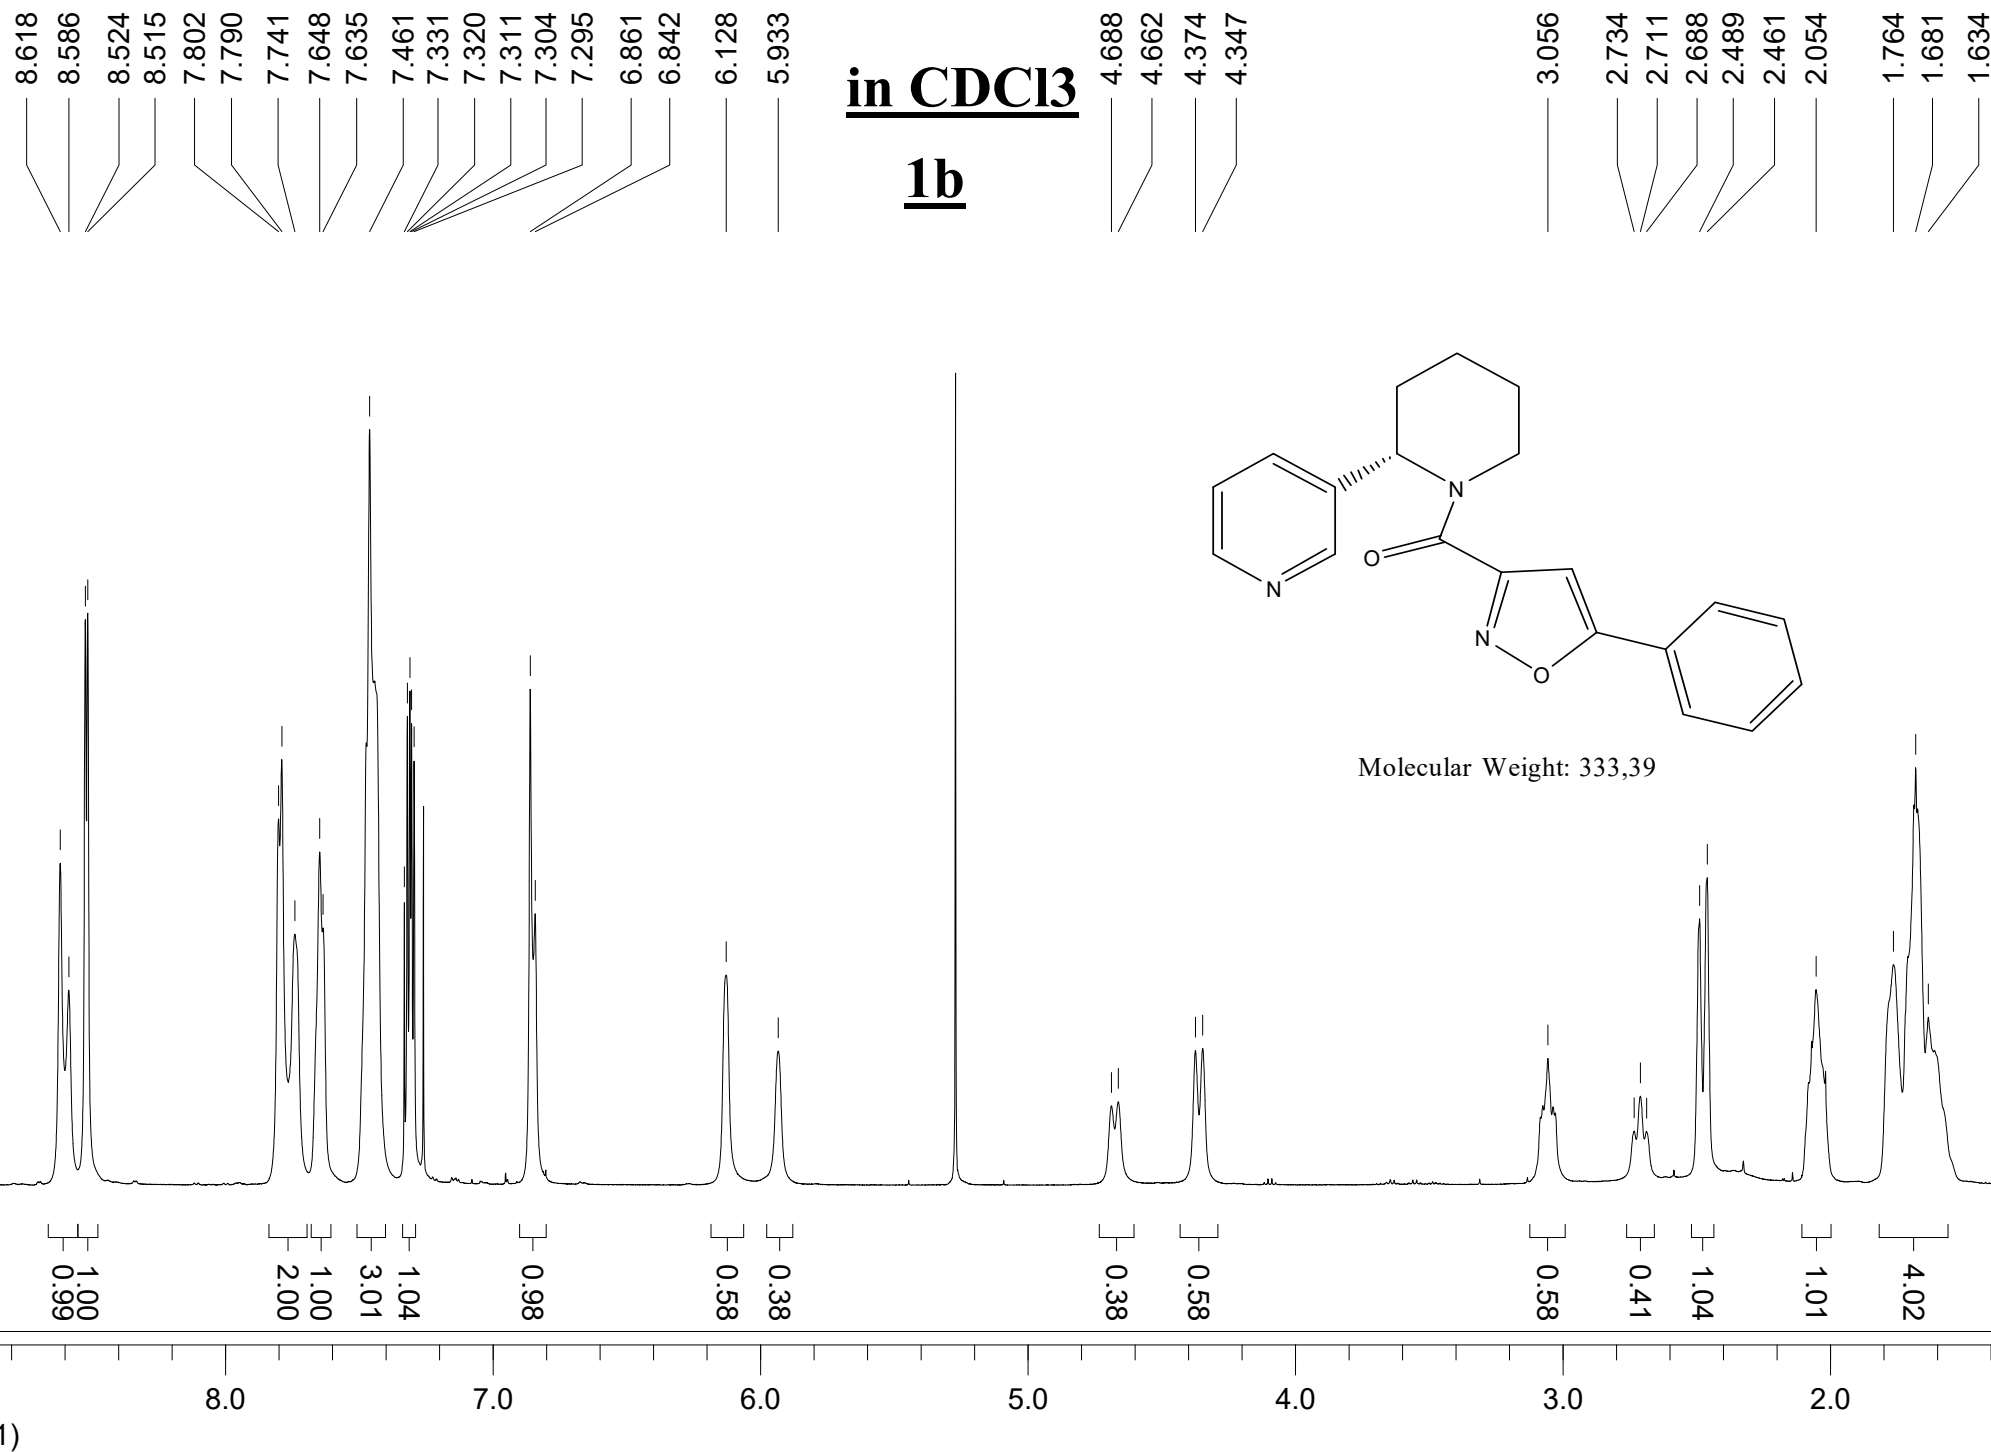

**1b**

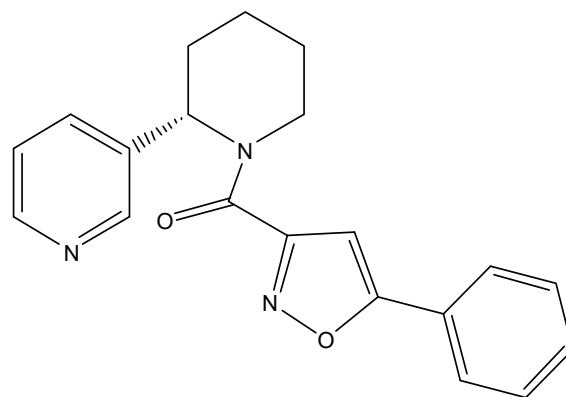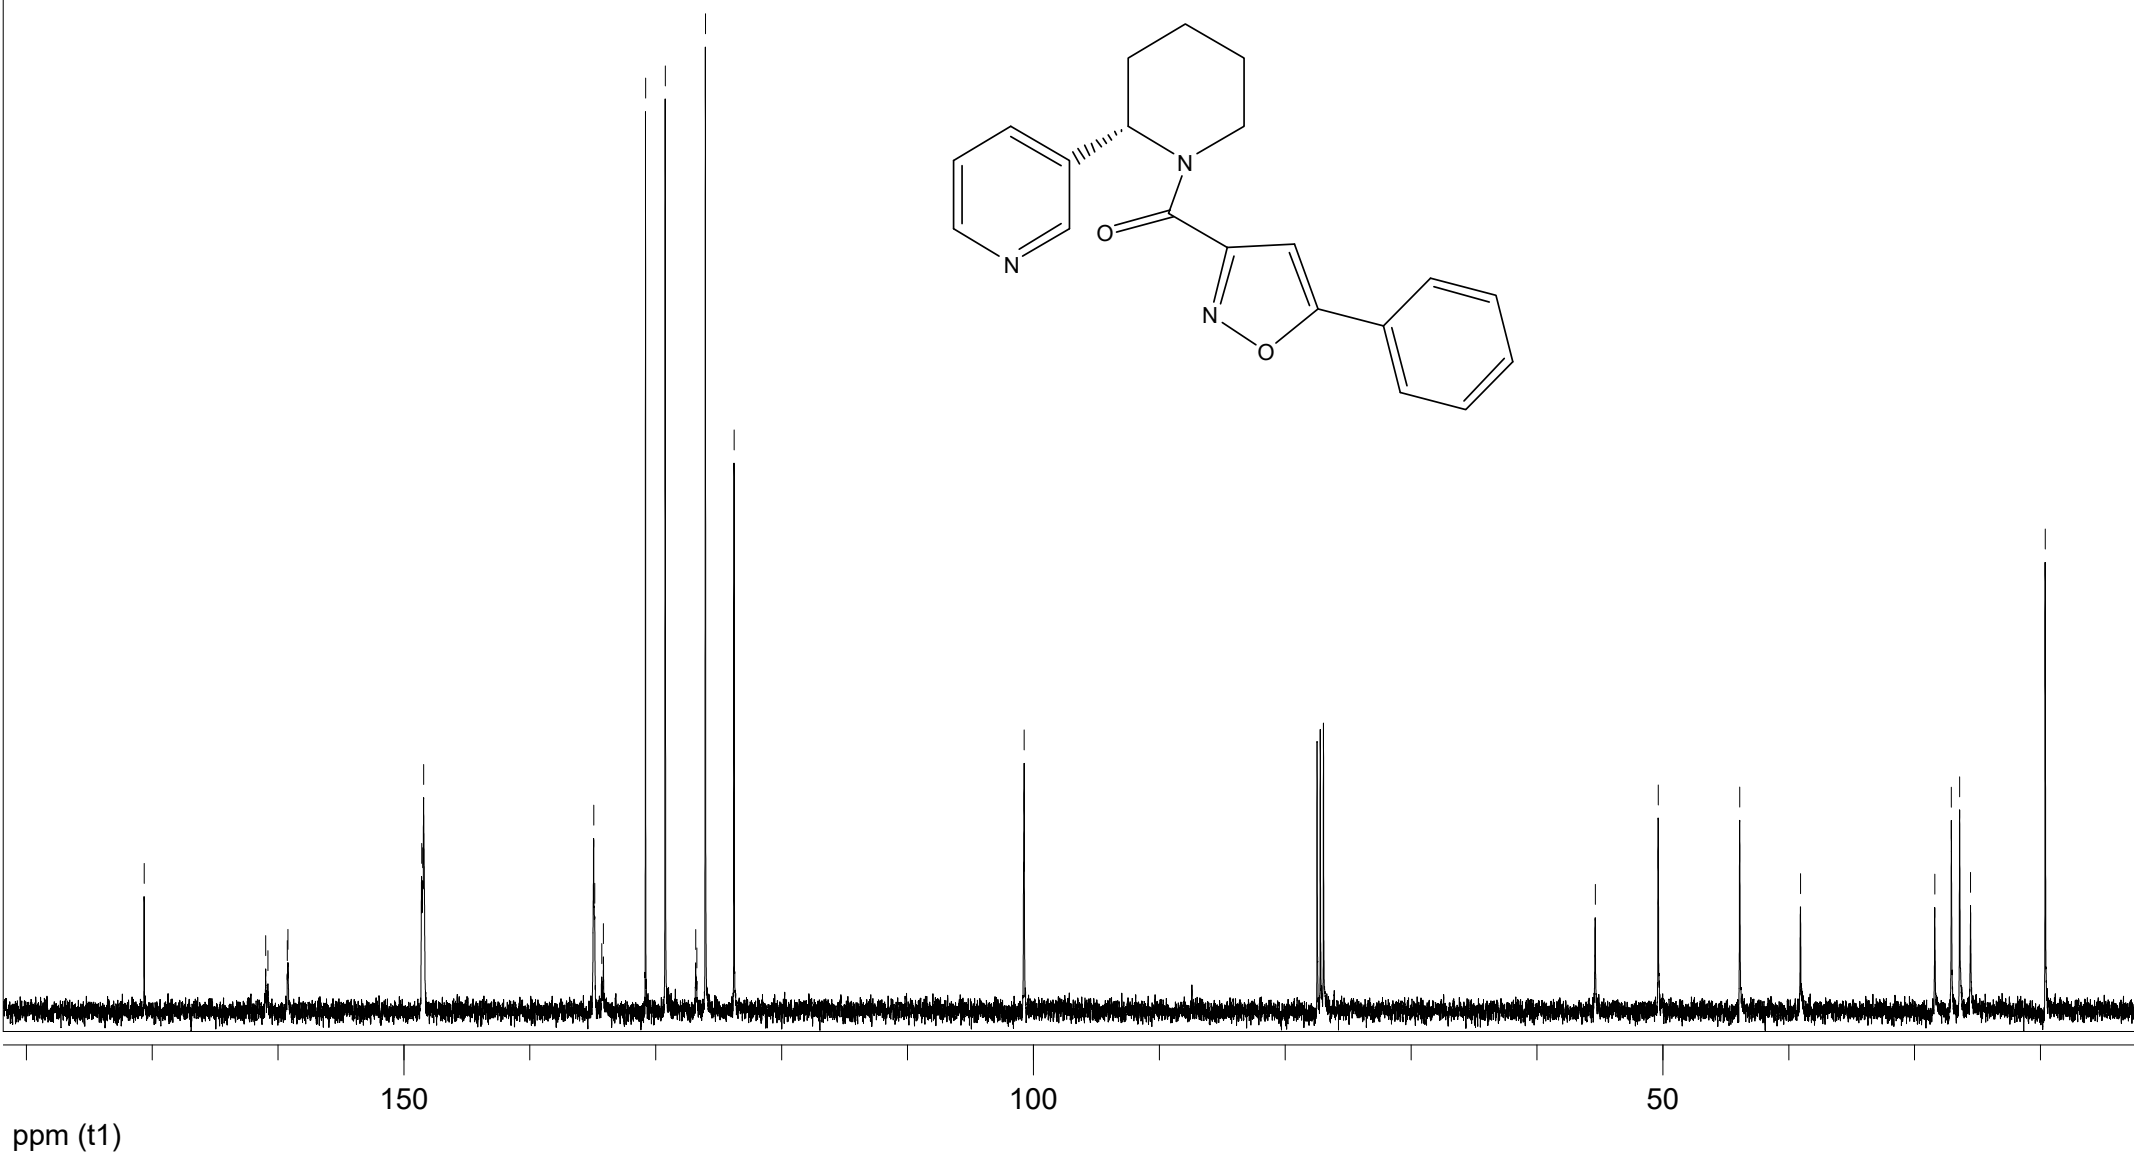

**1b**  
**DEPT**

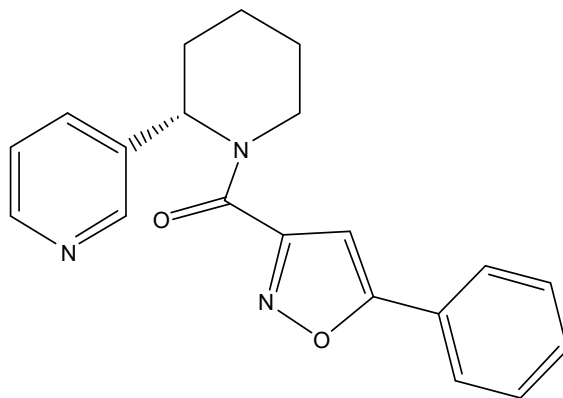

148.602  
148.530  
148.430  
148.391

134.946  
134.864  
130.815  
129.246  
126.055  
123.780

100.772  
100.727

55.379

50.367

43.892

39.067

28.392  
27.076  
26.426  
25.548  
19.630

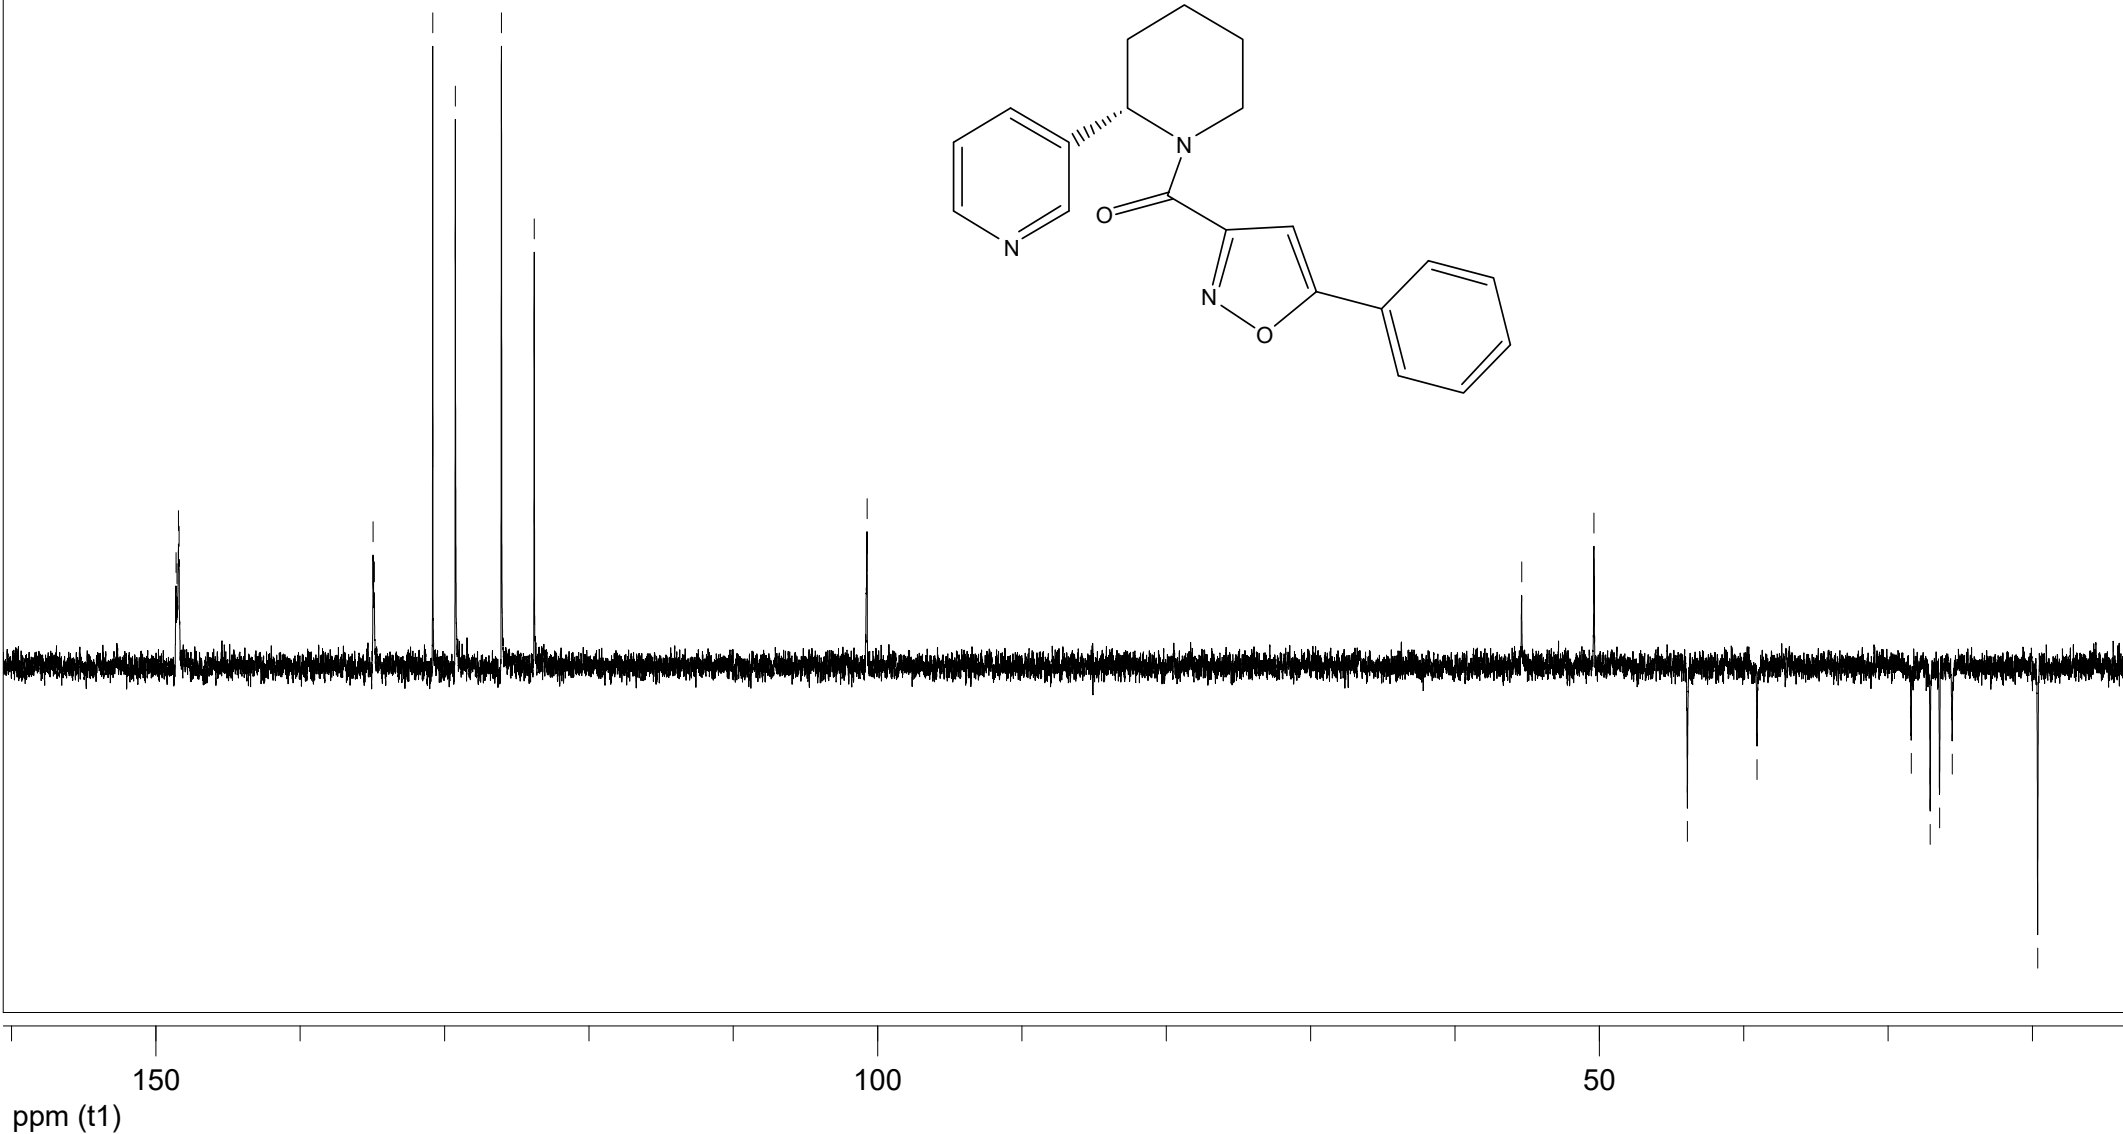

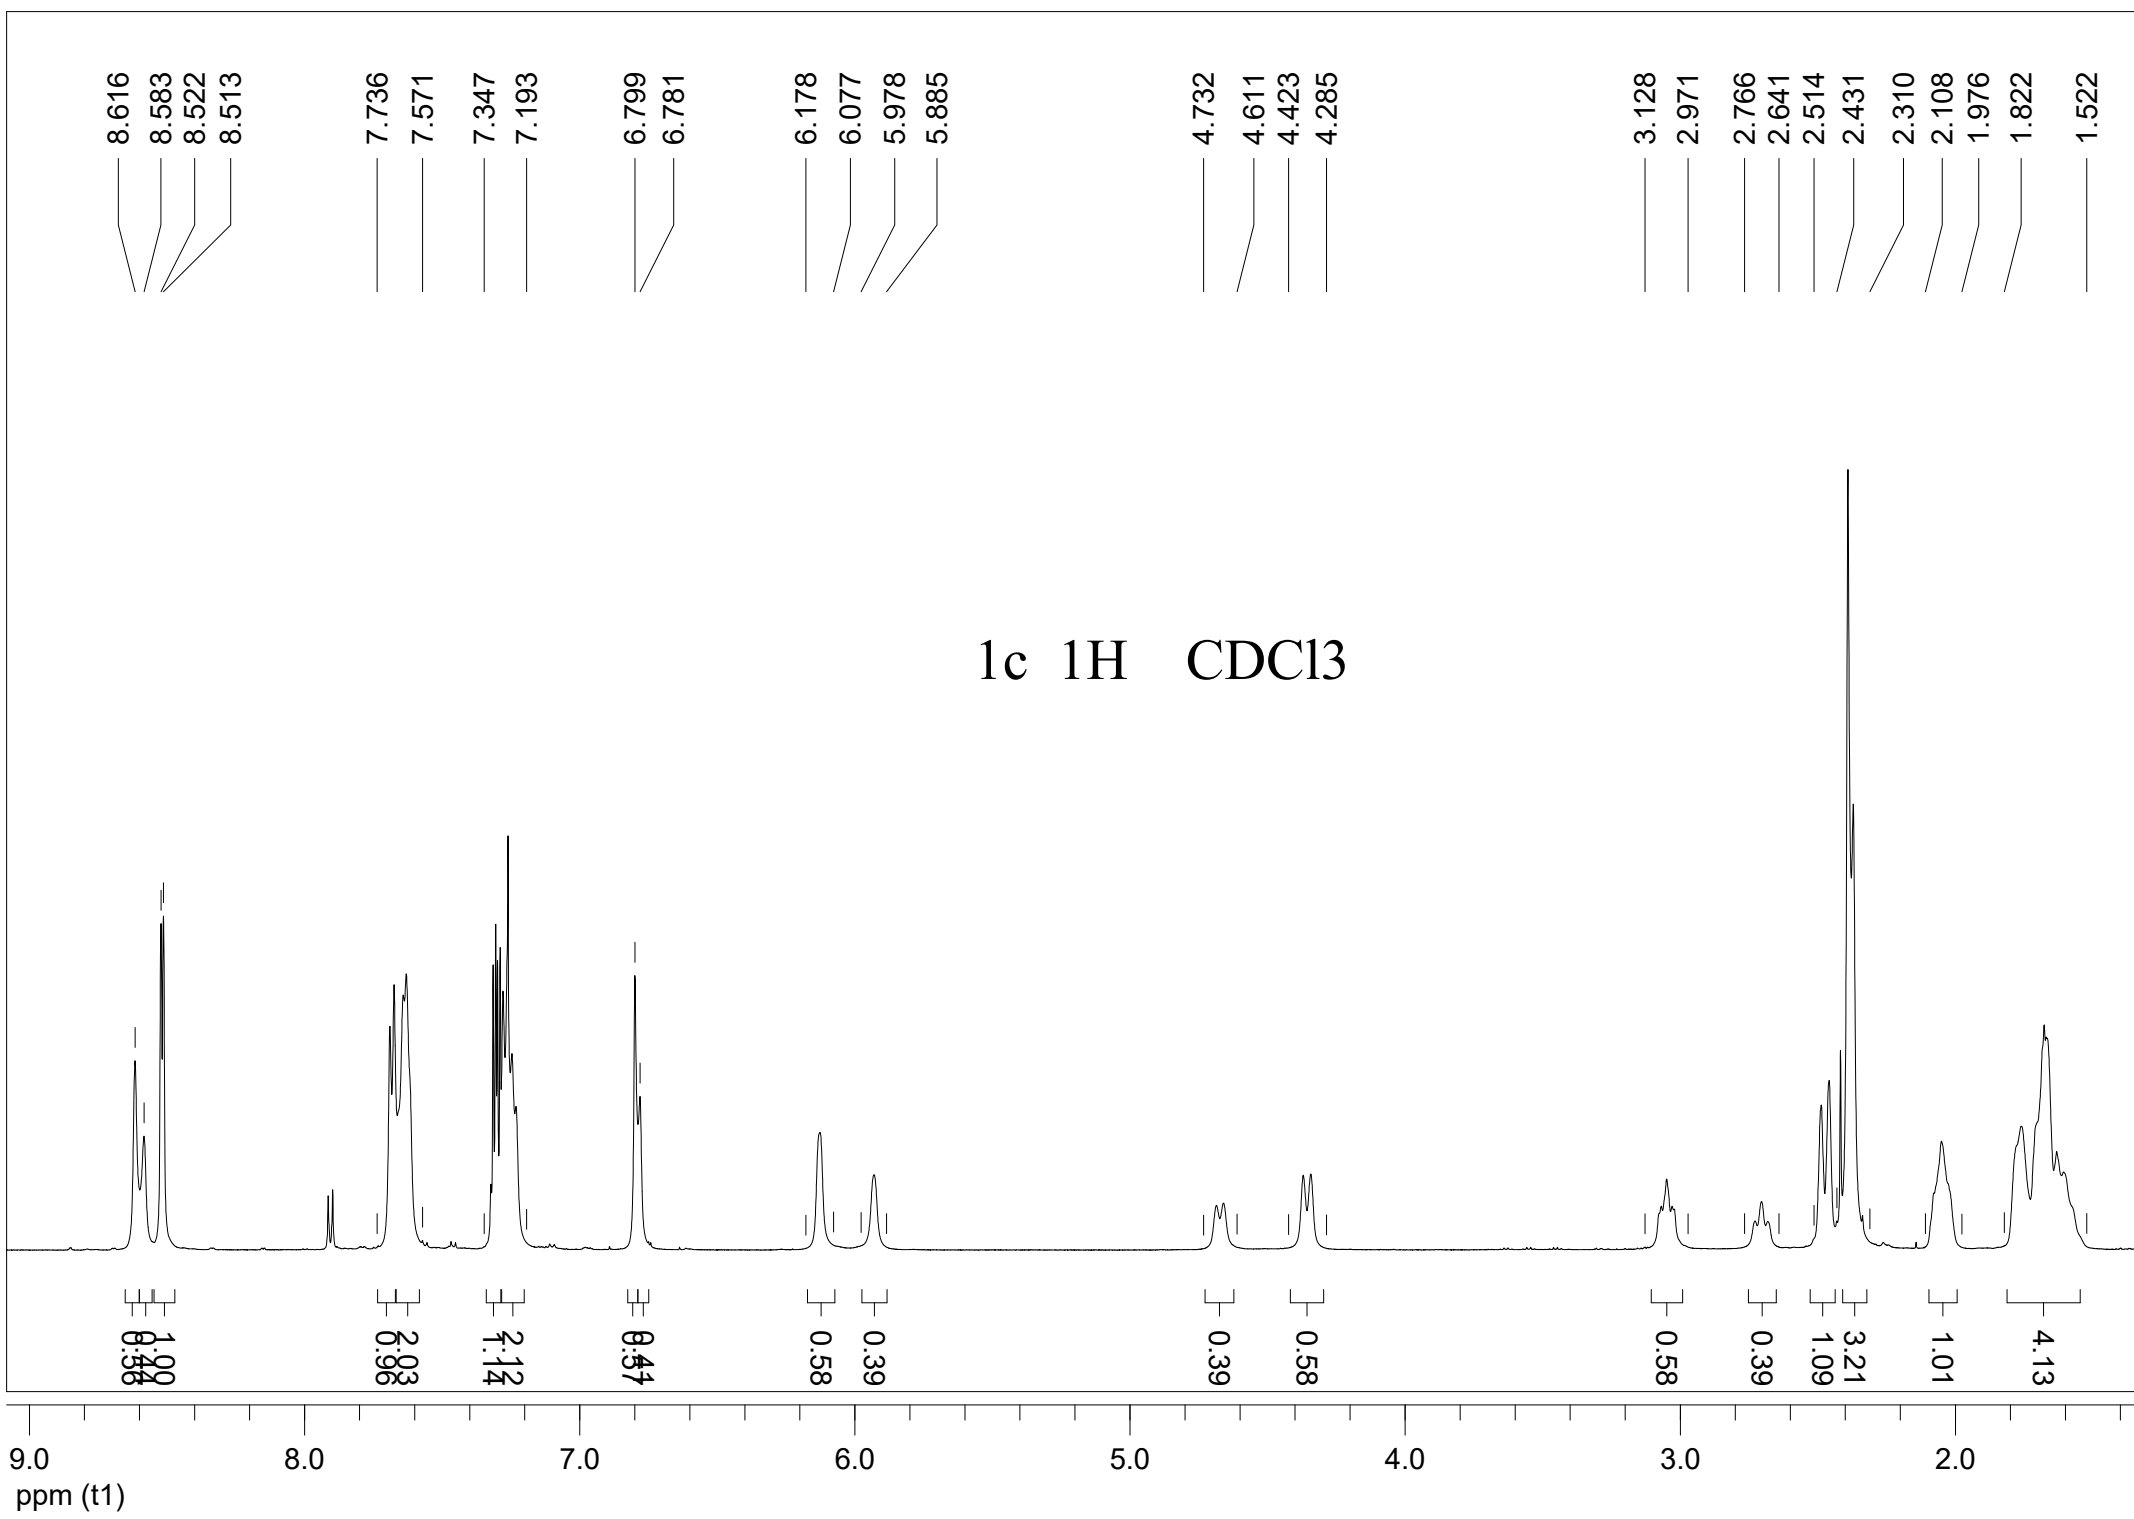

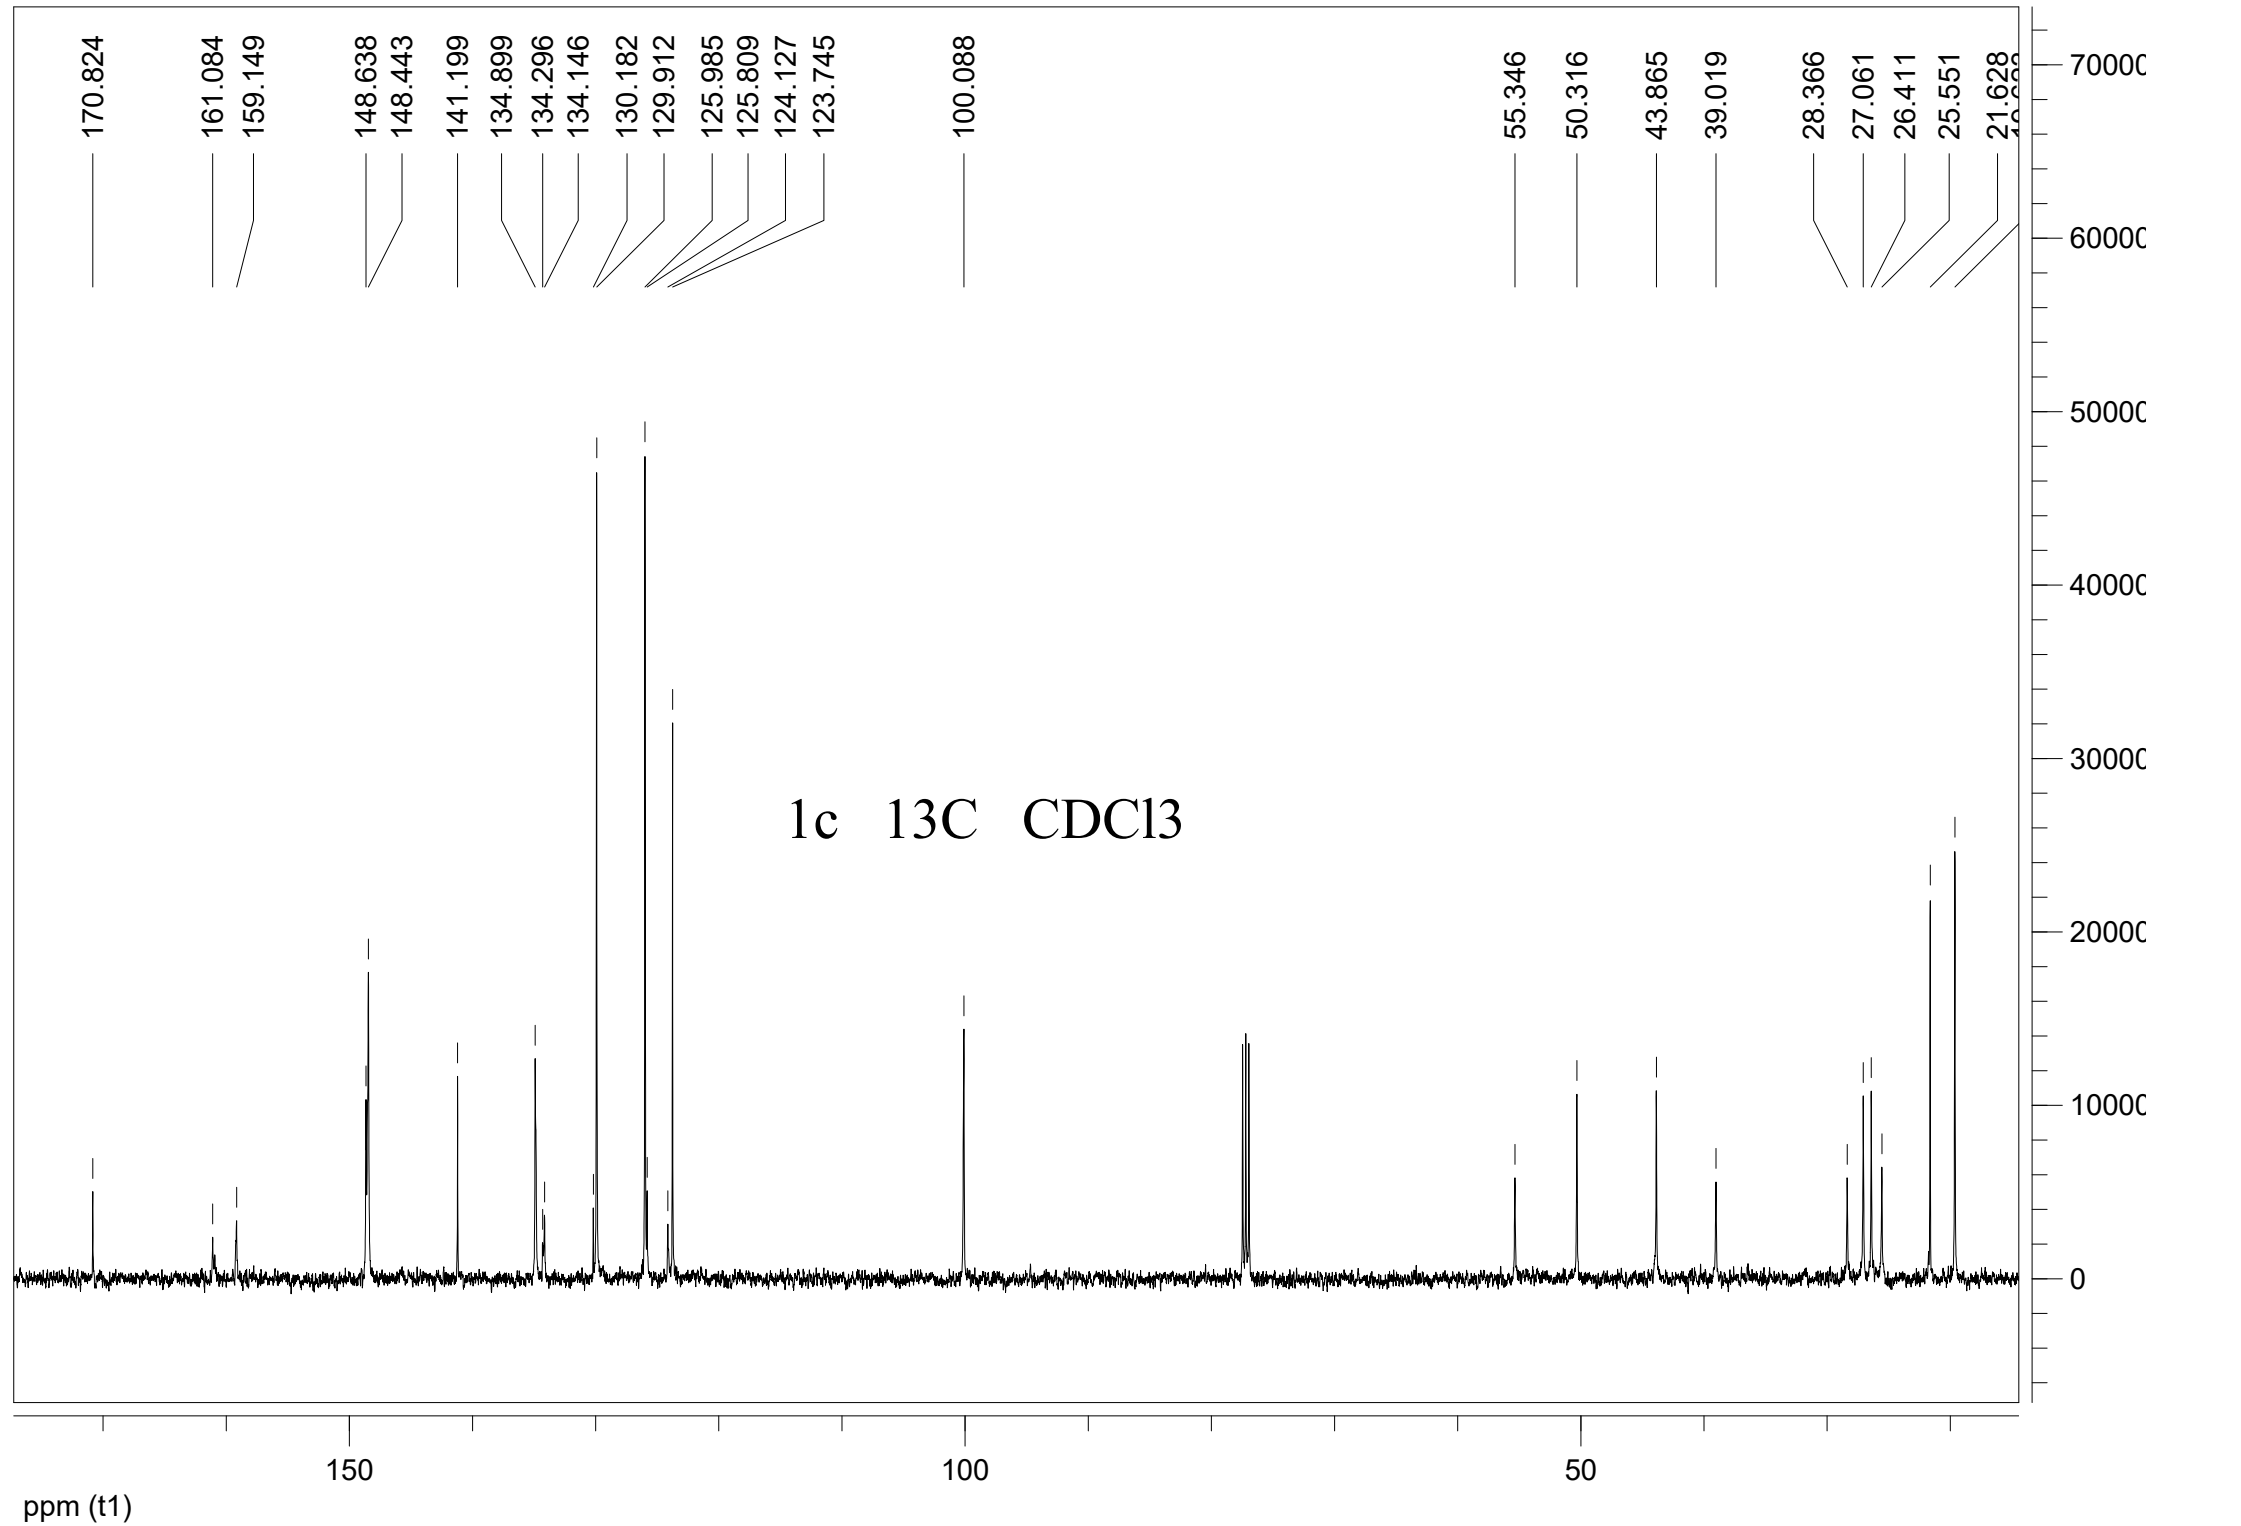



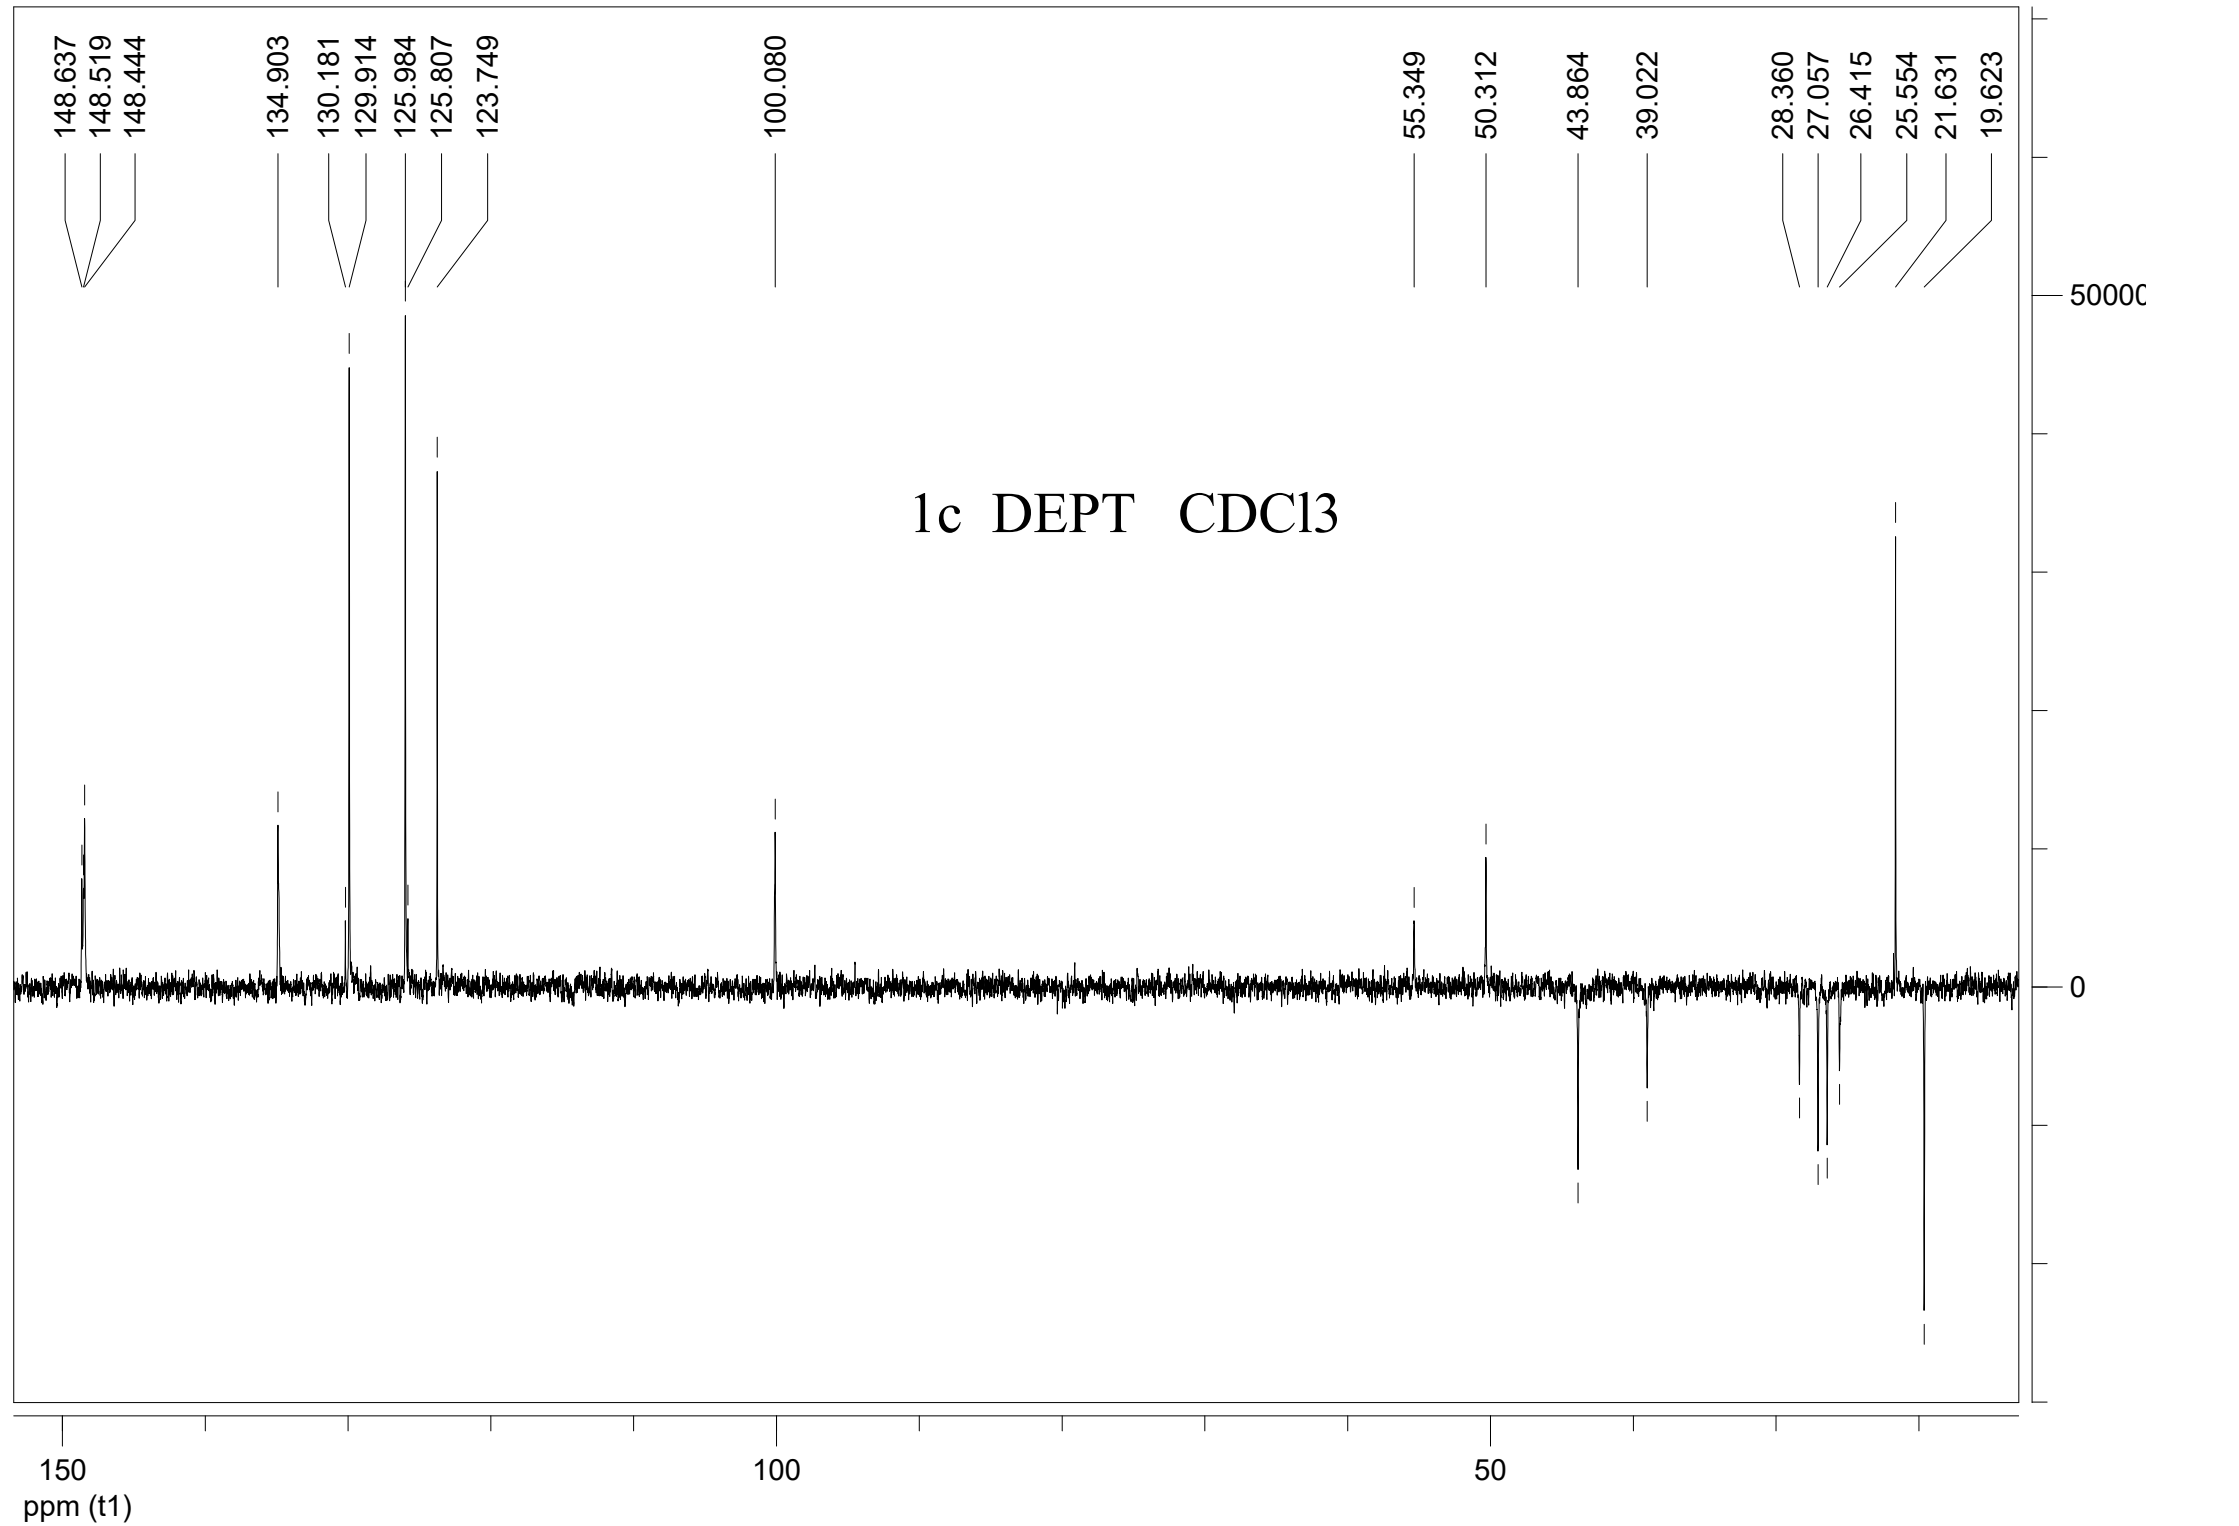

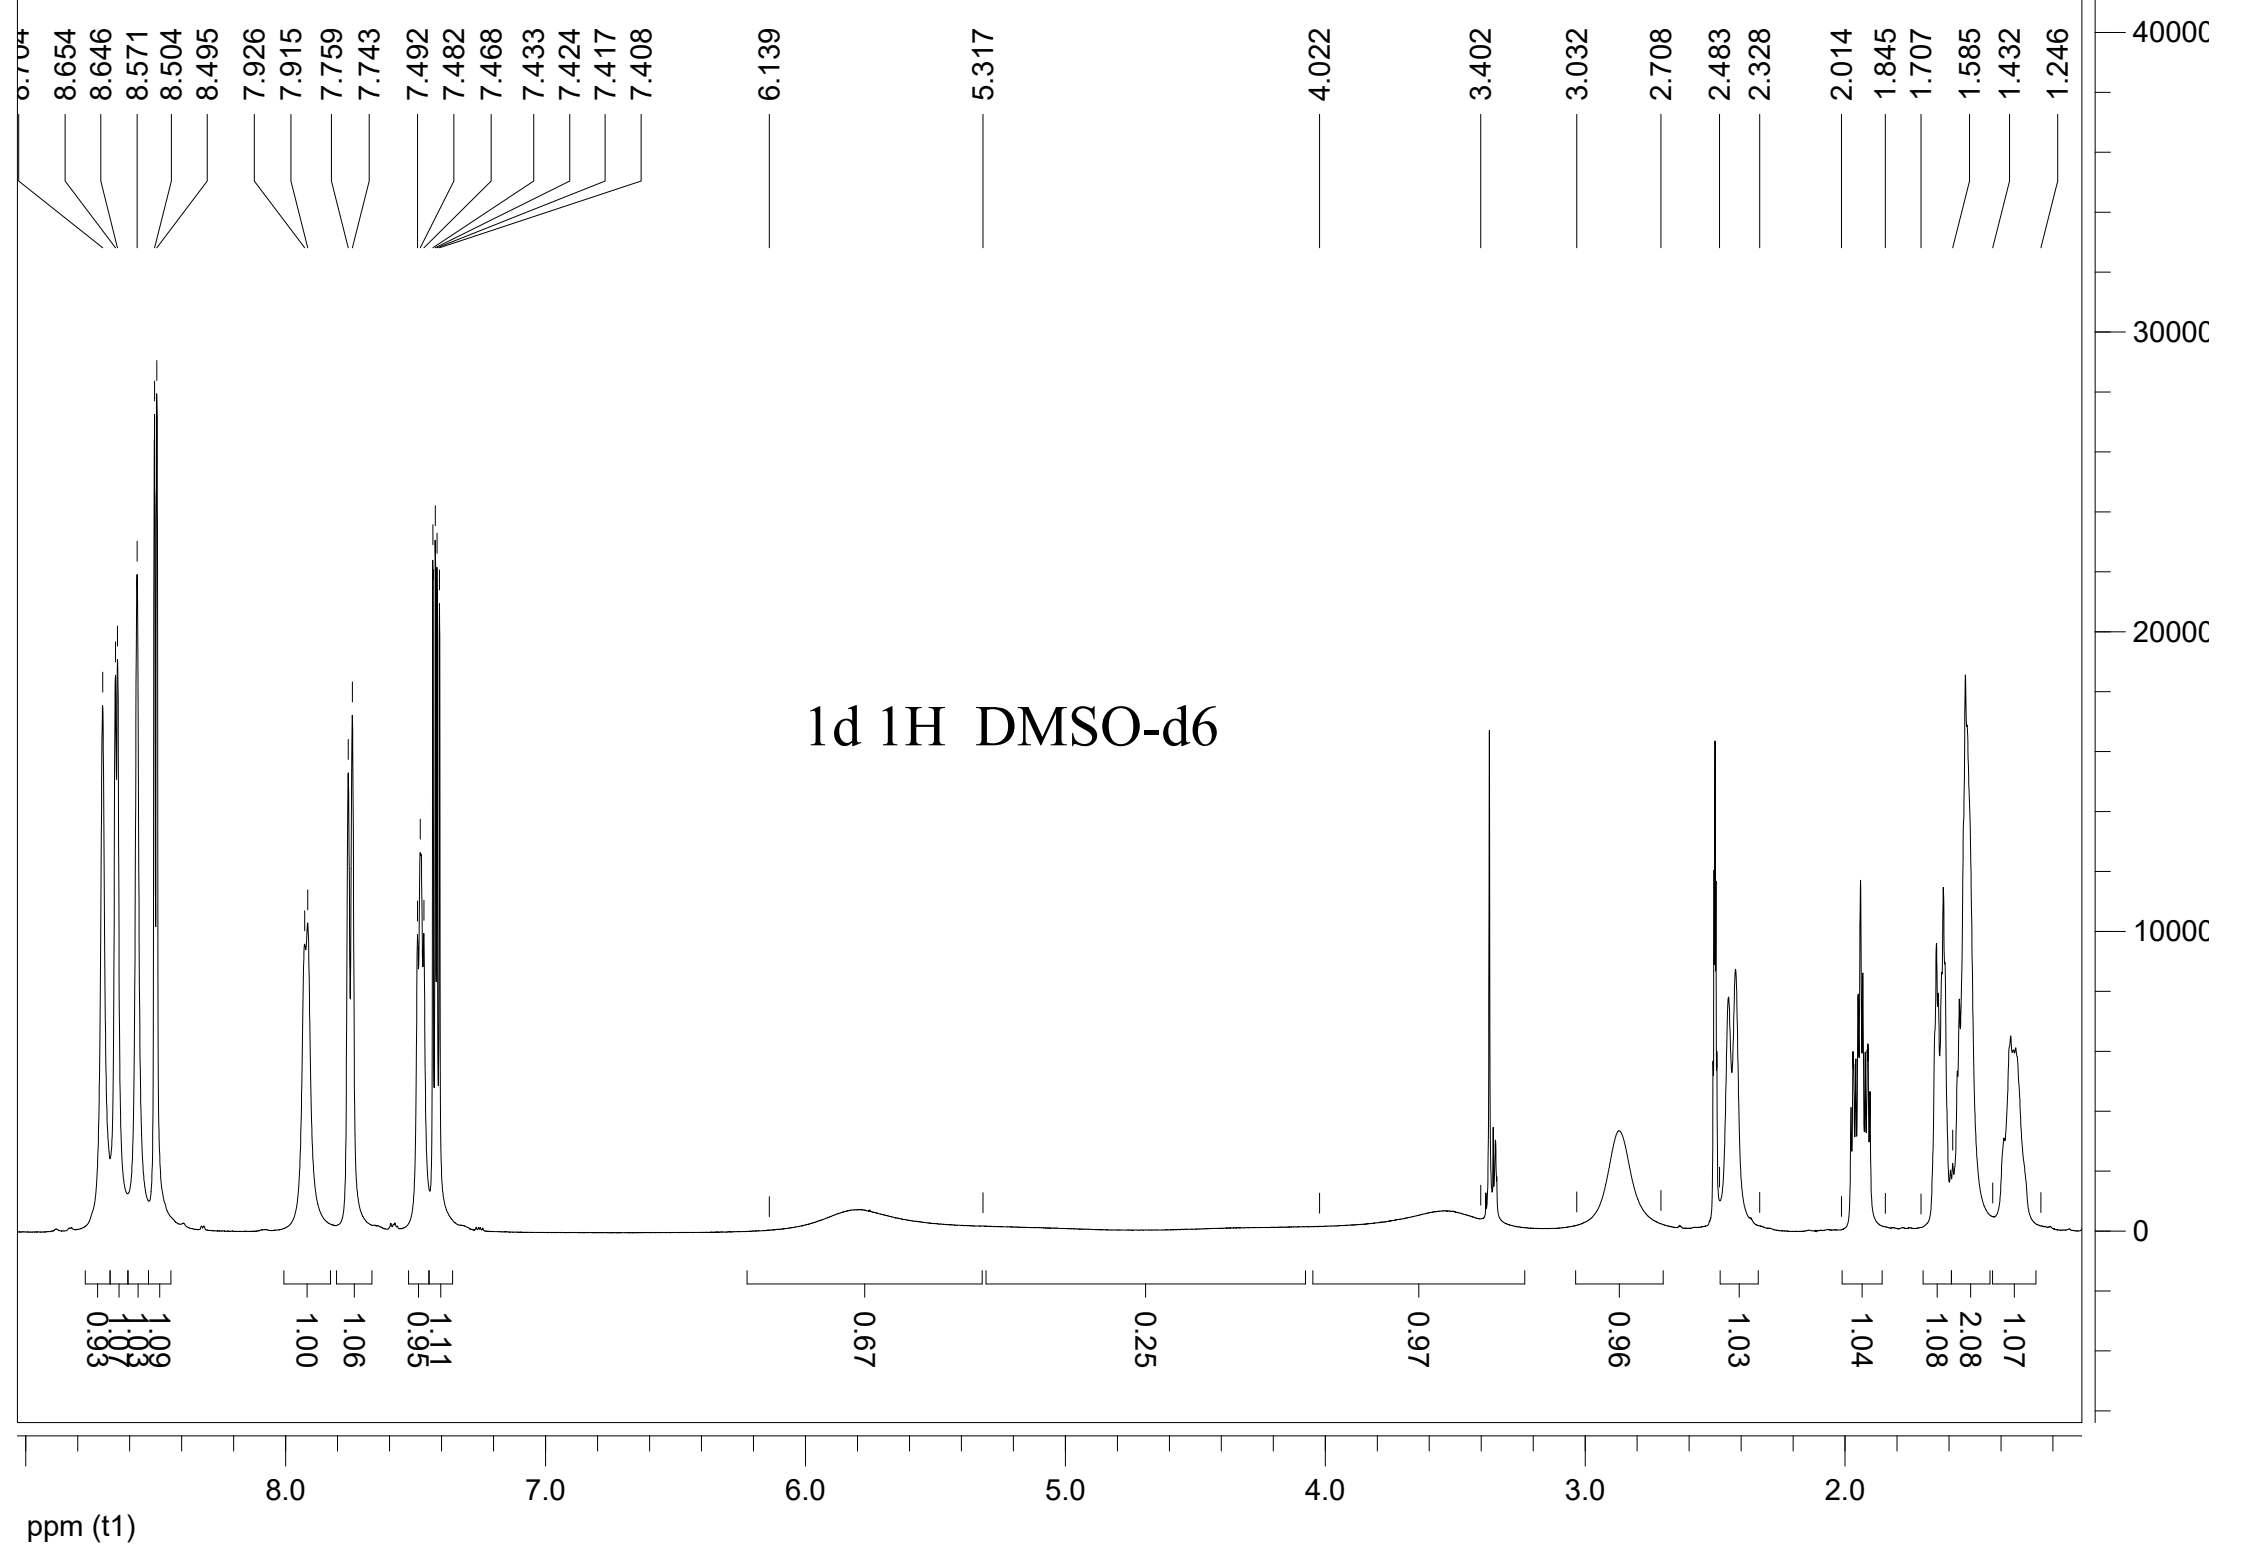

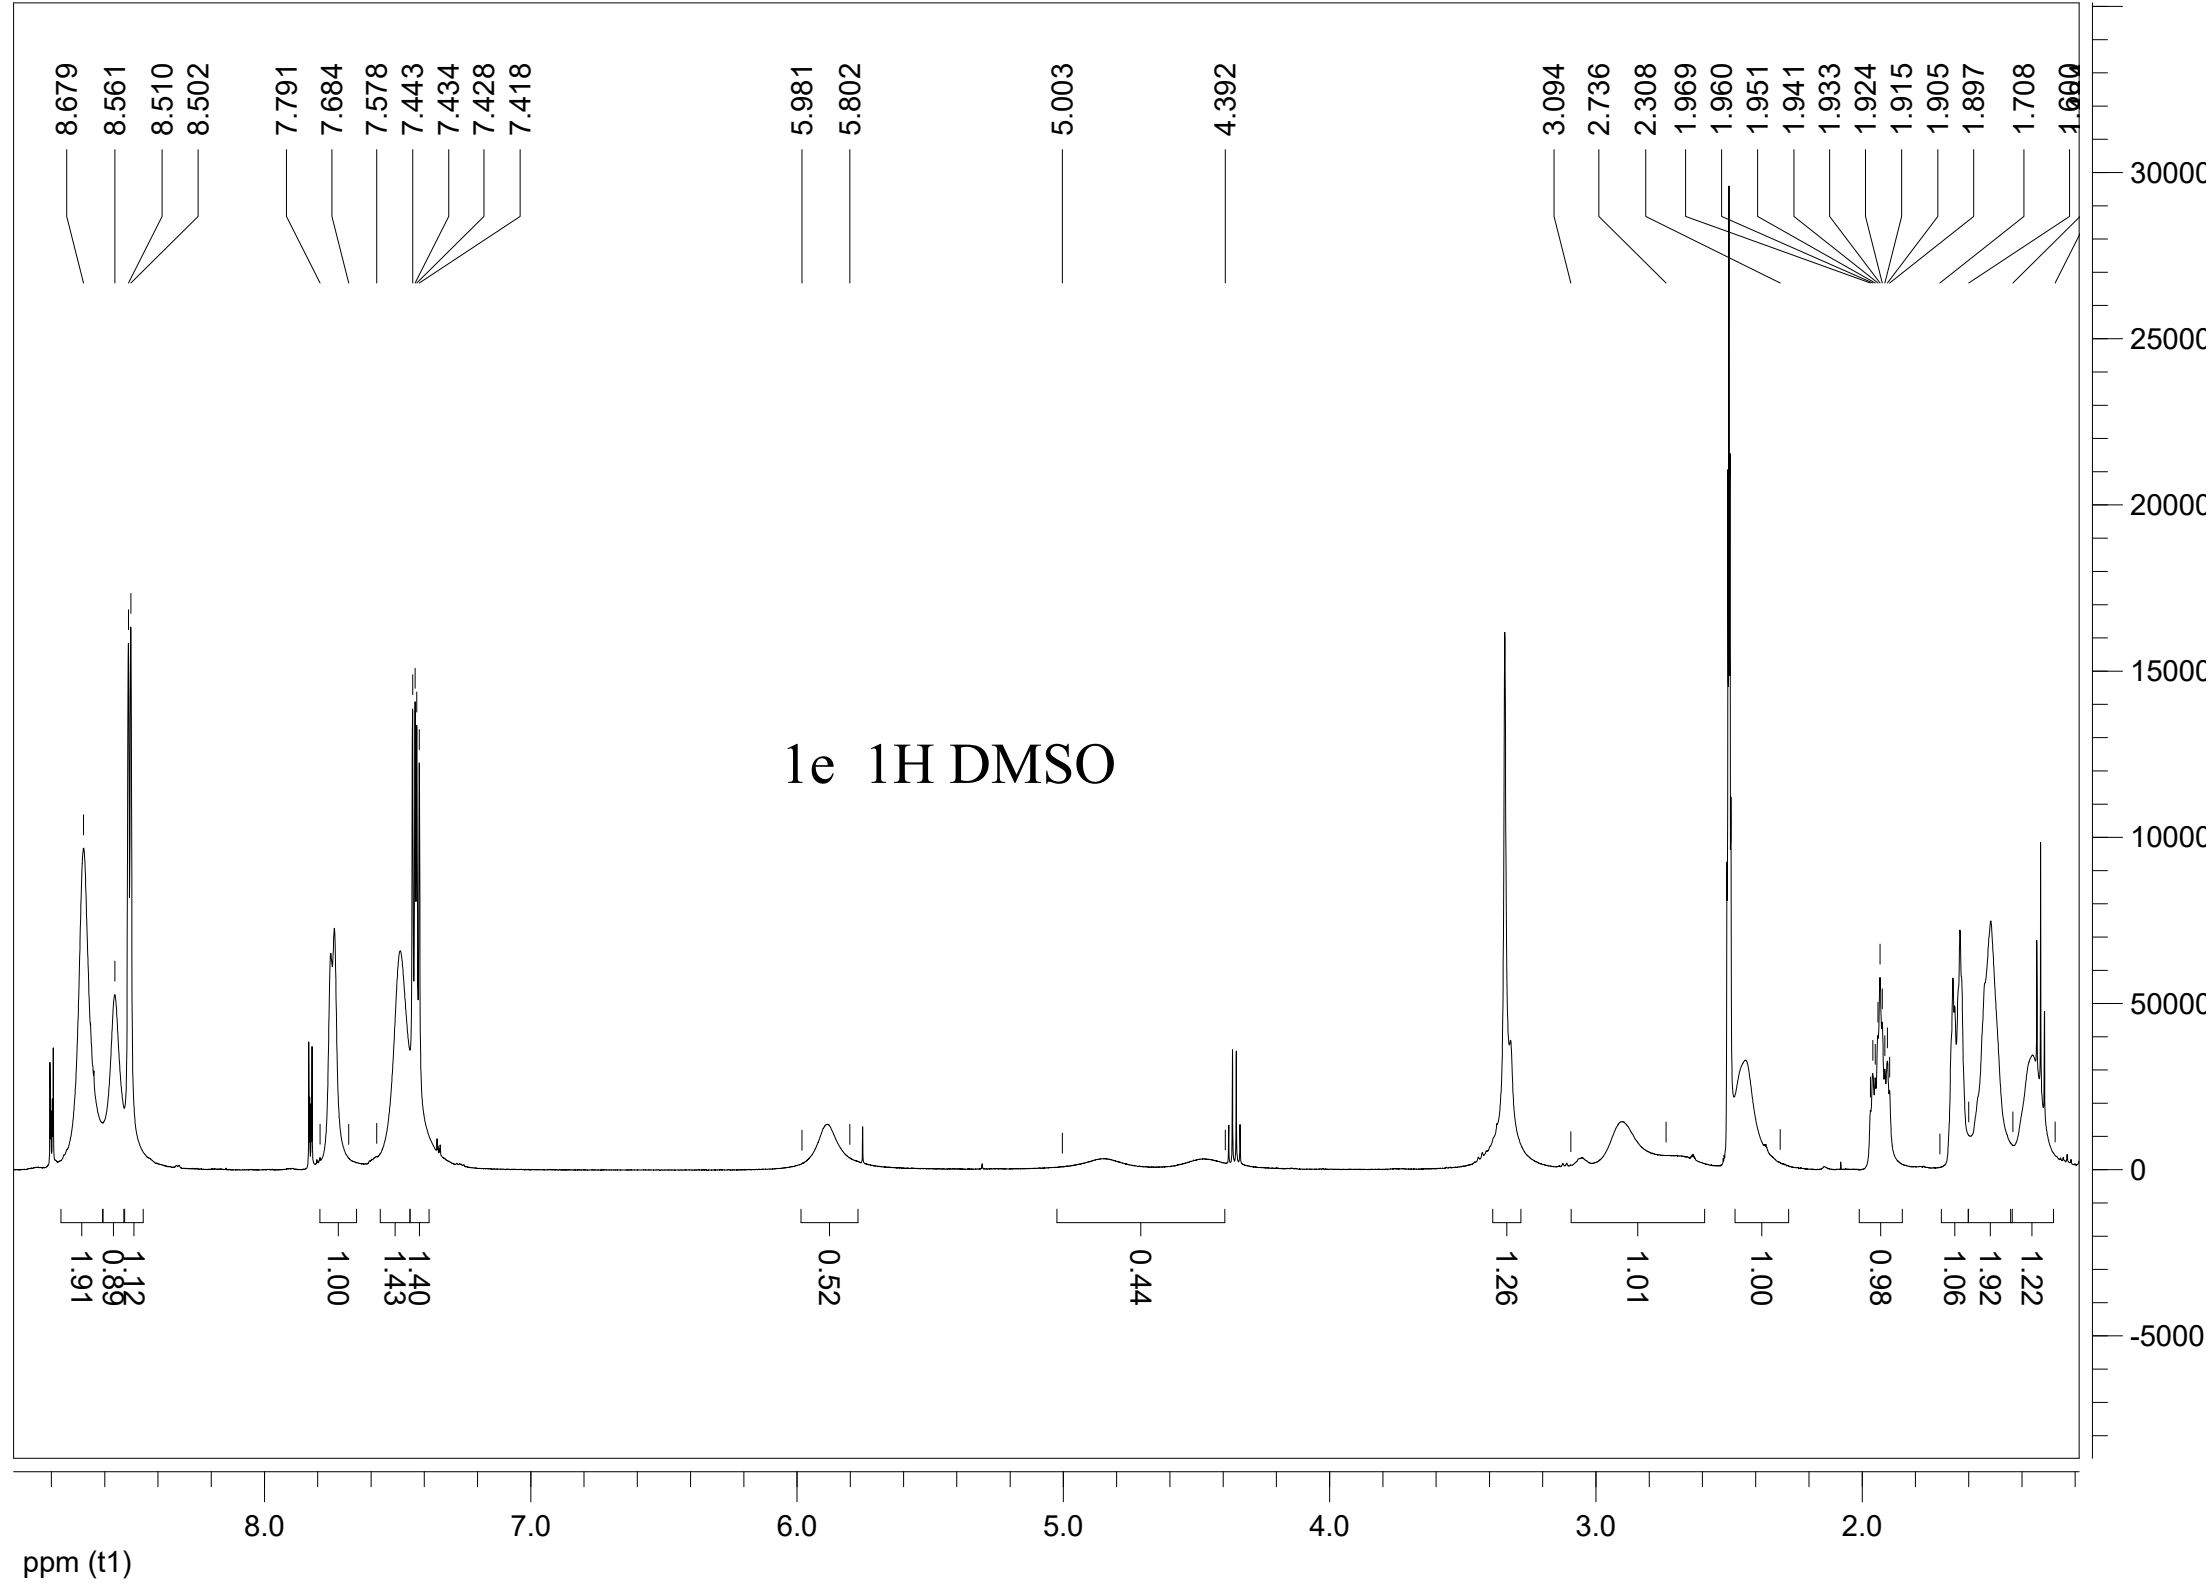

1f (1H, CDCl<sub>3</sub>)

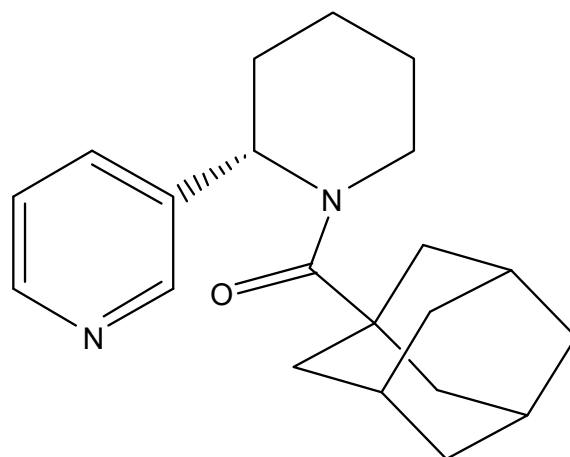

Molecular Weight: 324,47

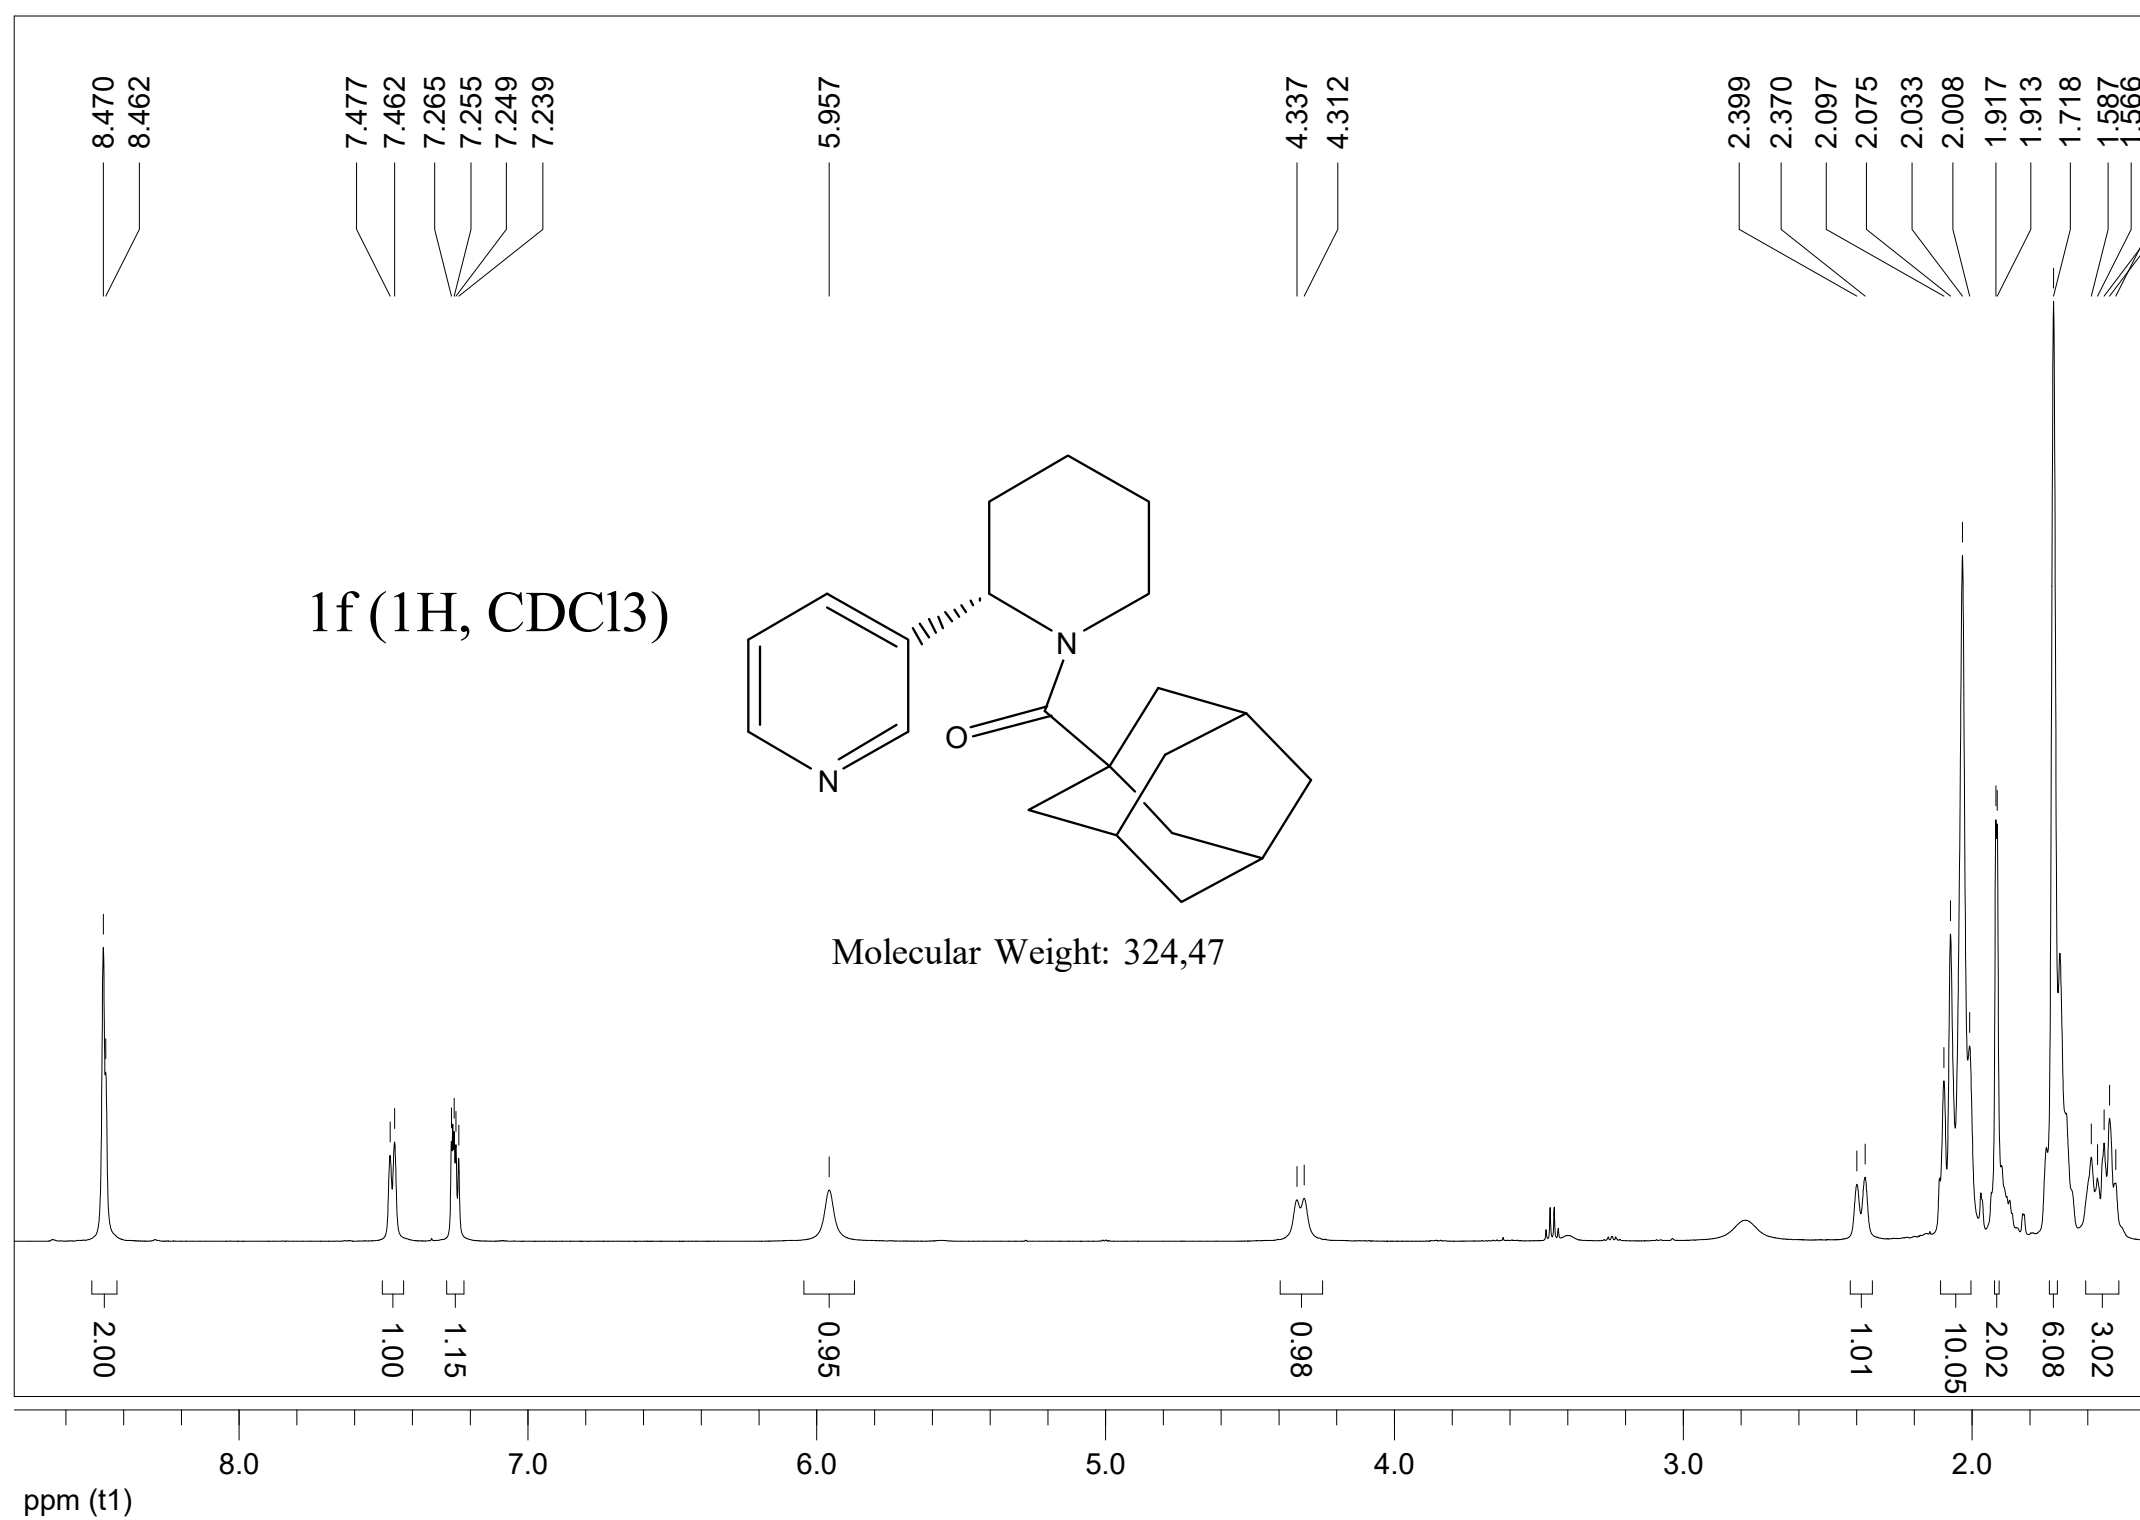

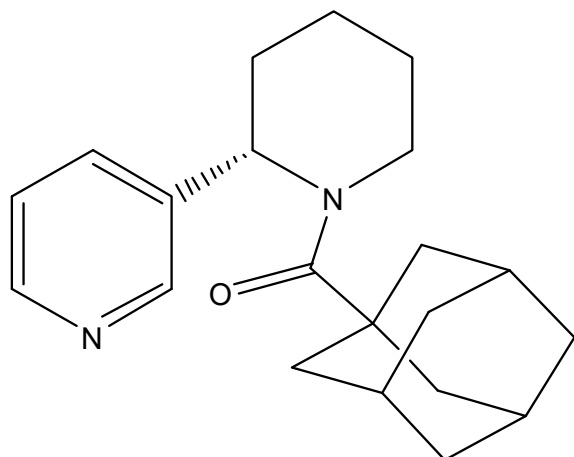

**1f (13C, CDCl3)**

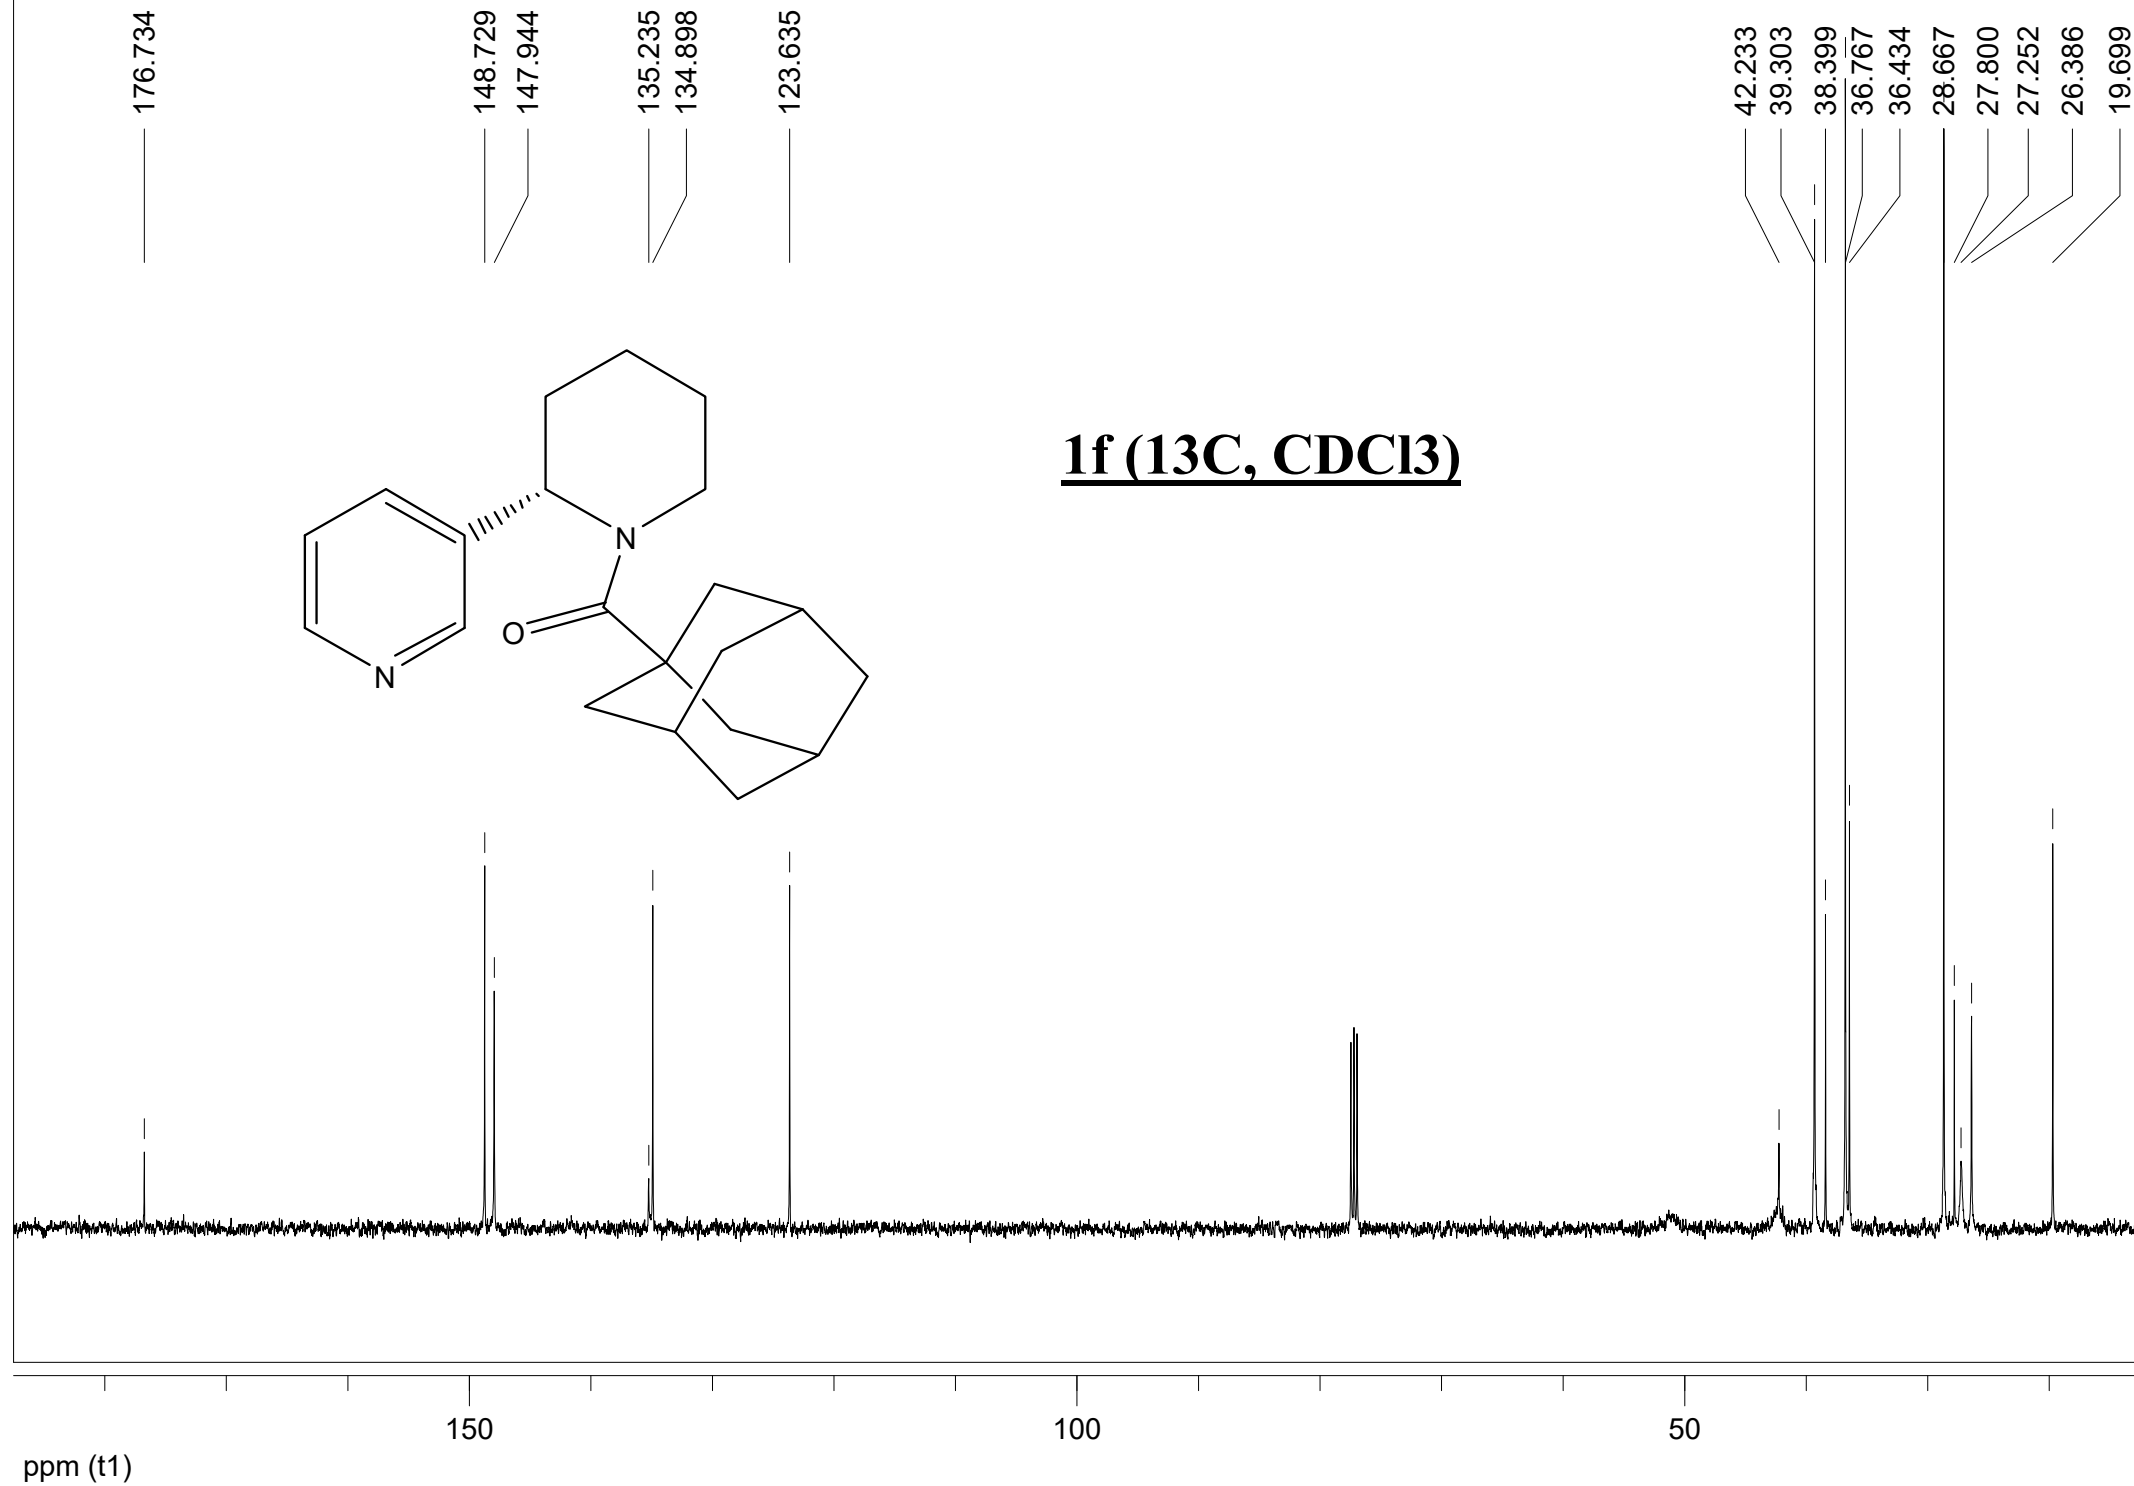

**DEPT**  
**1f**

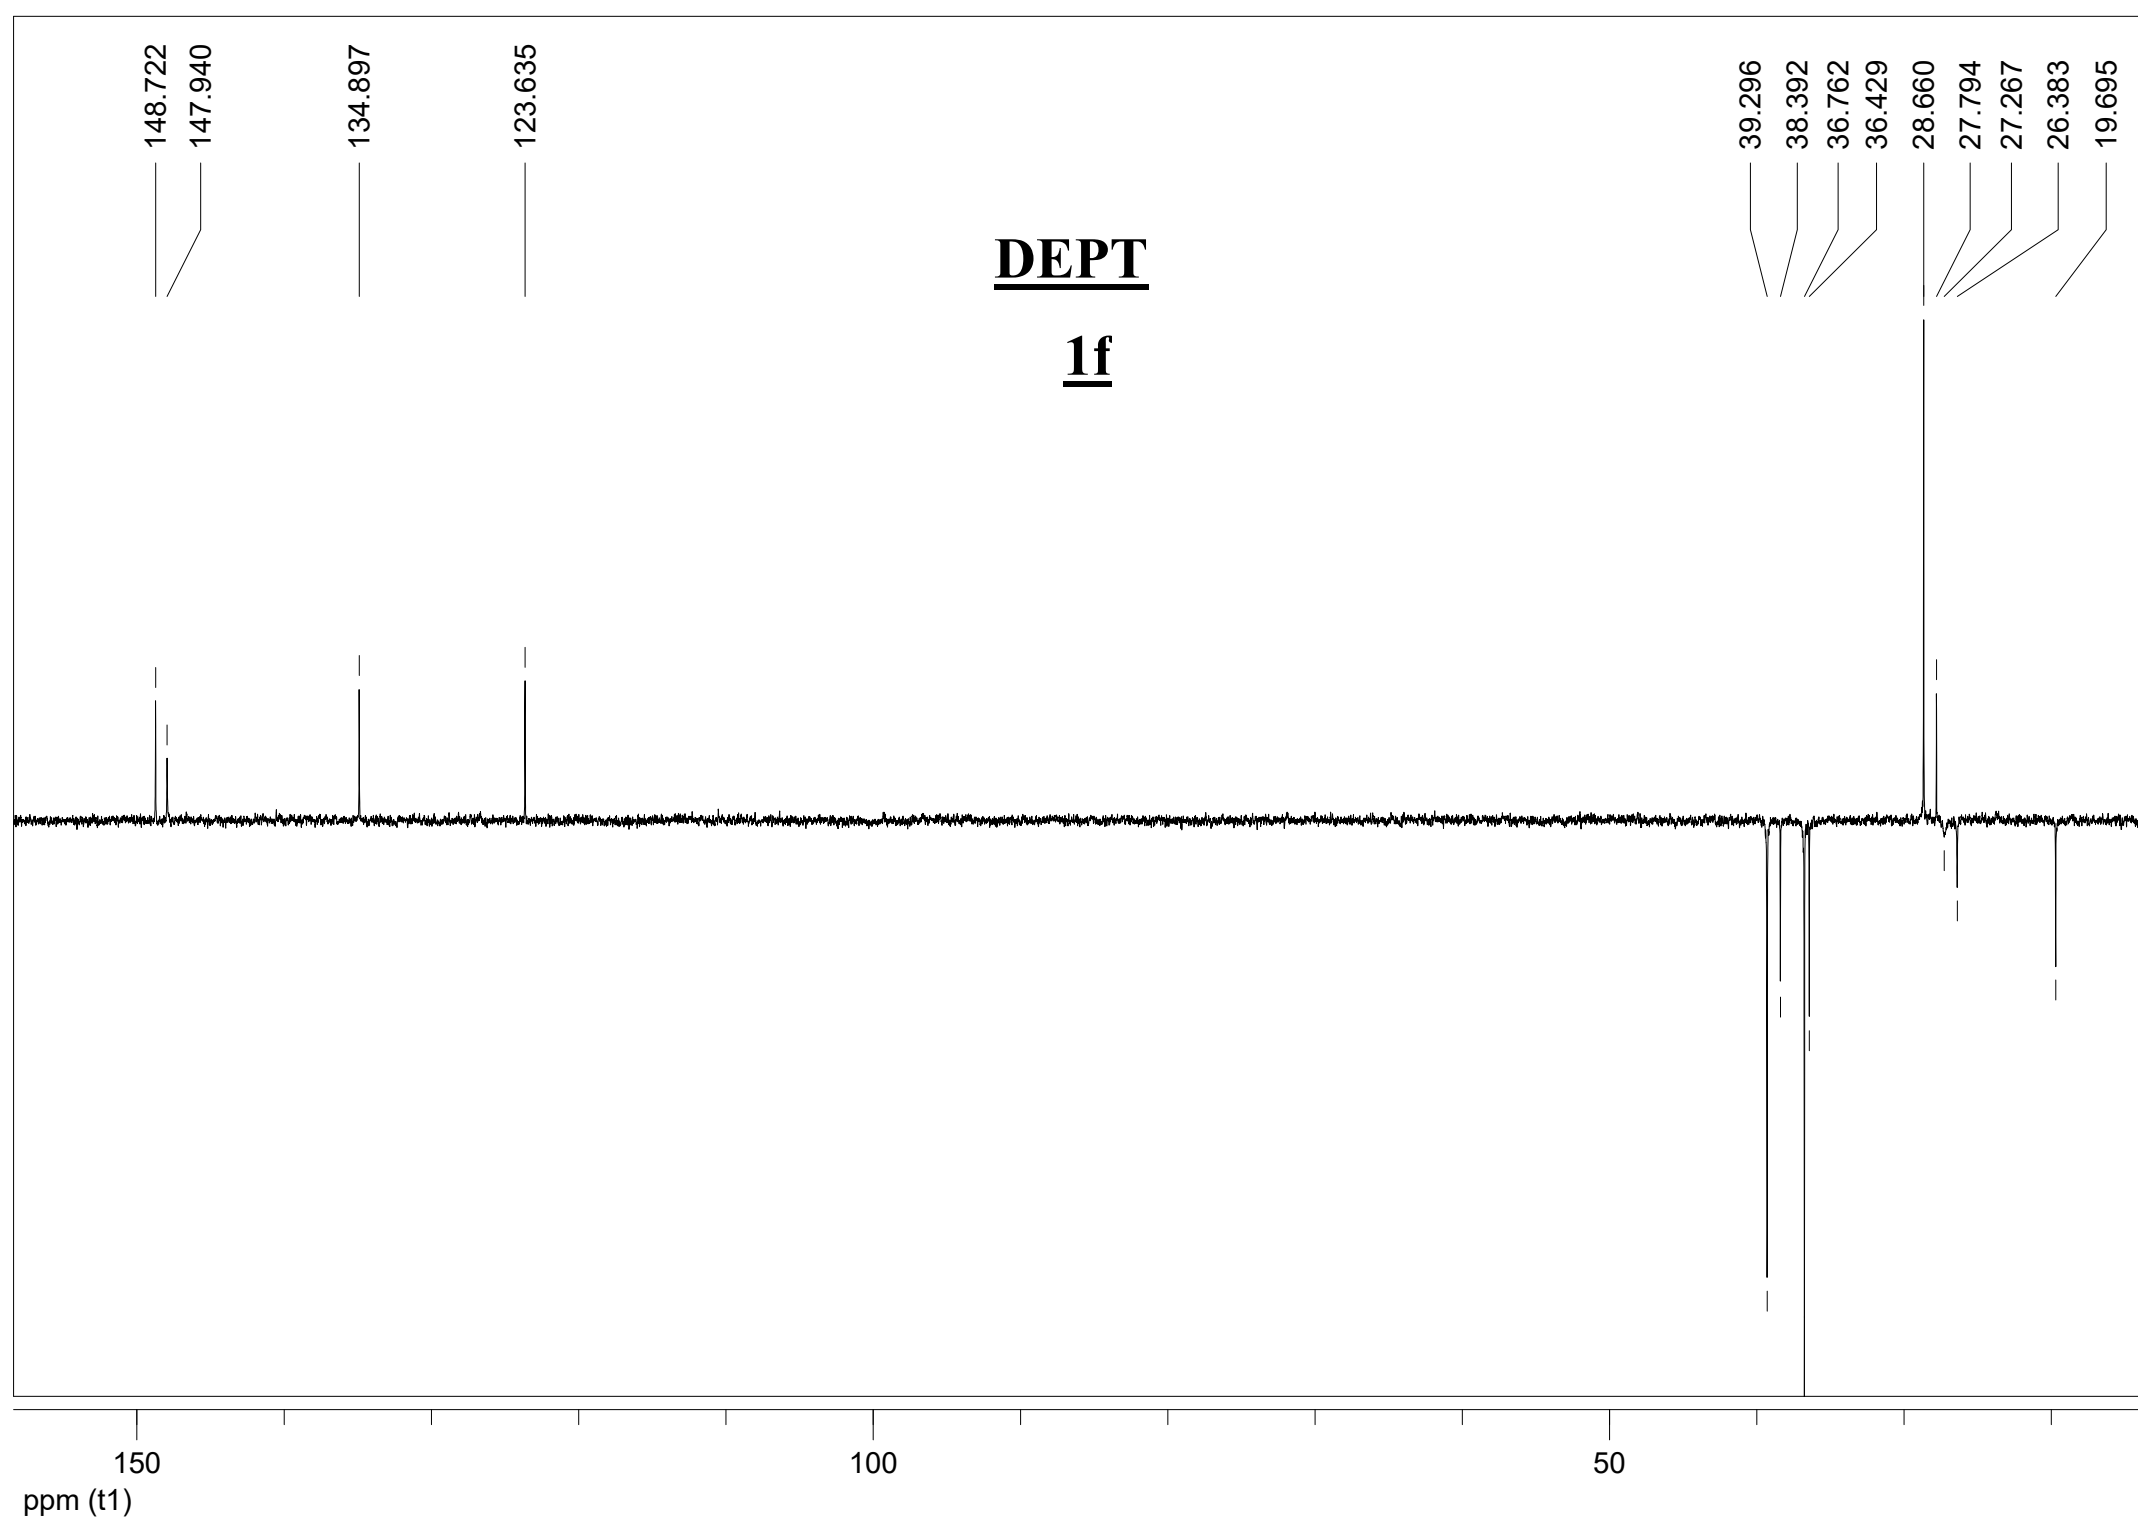

2a 1H DMSO

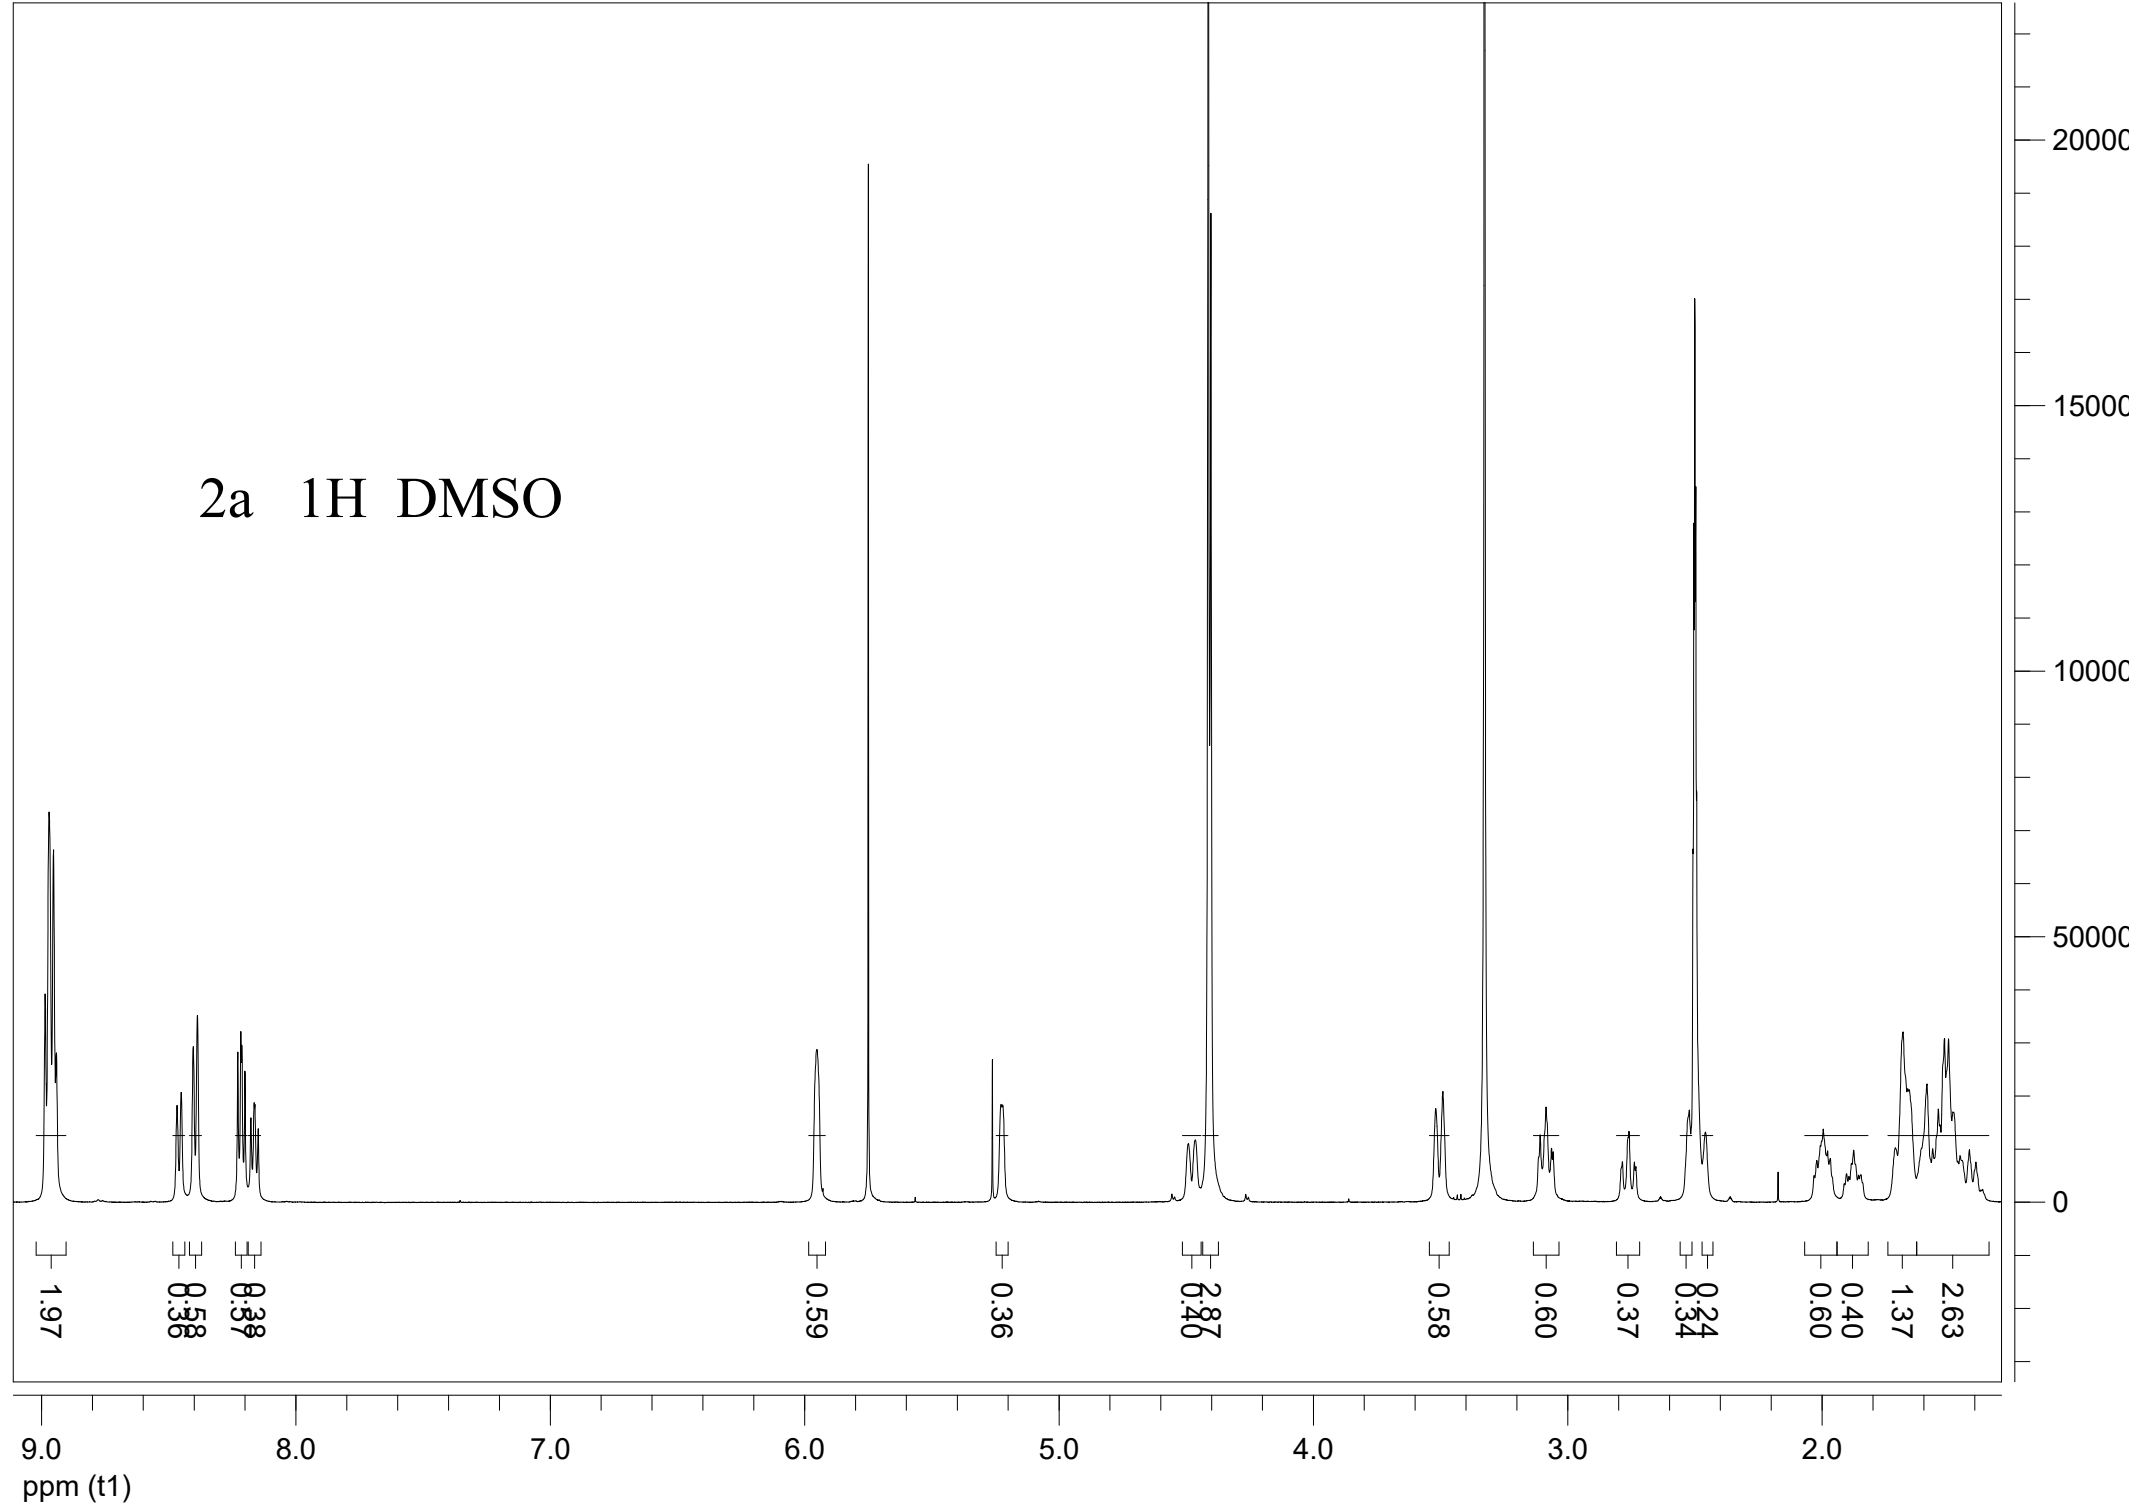

2a <sup>13</sup>C DMSO

162.490  
161.978  
160.032  
159.927  
149.821  
144.838  
144.537  
143.824  
143.421  
140.155  
128.398  
128.105  
122.050

55.518  
55.273  
50.390  
48.911  
43.846  
38.860  
29.035  
27.423  
25.619  
25.338  
19.446  
19.246

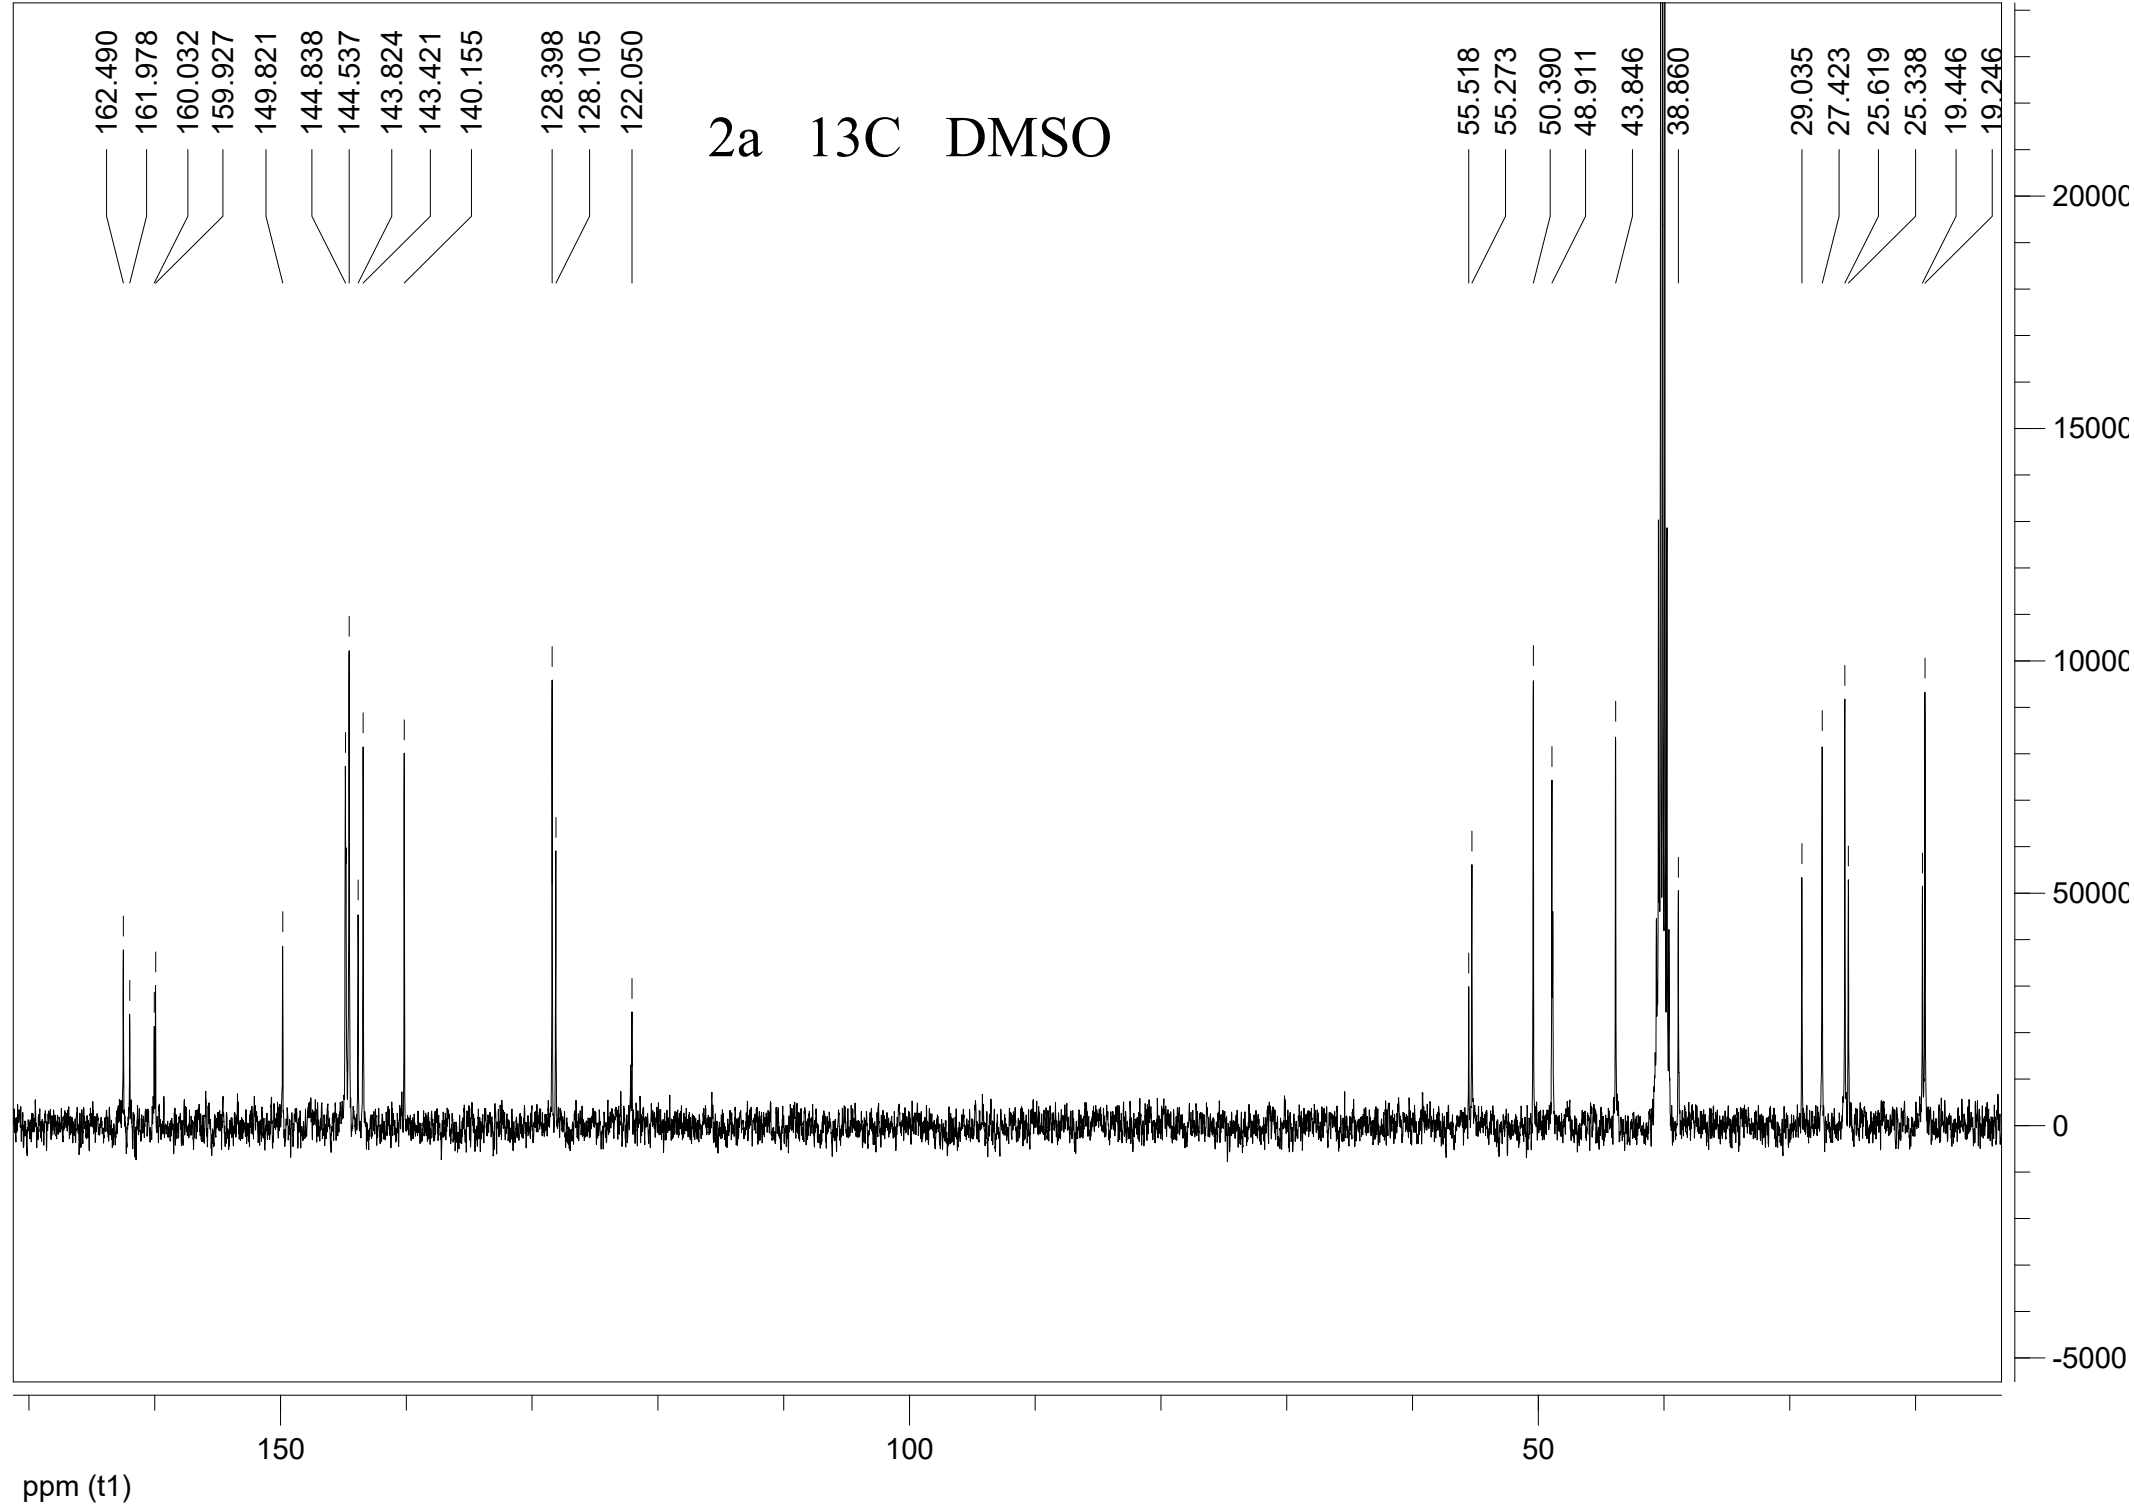



# 2a DEPT

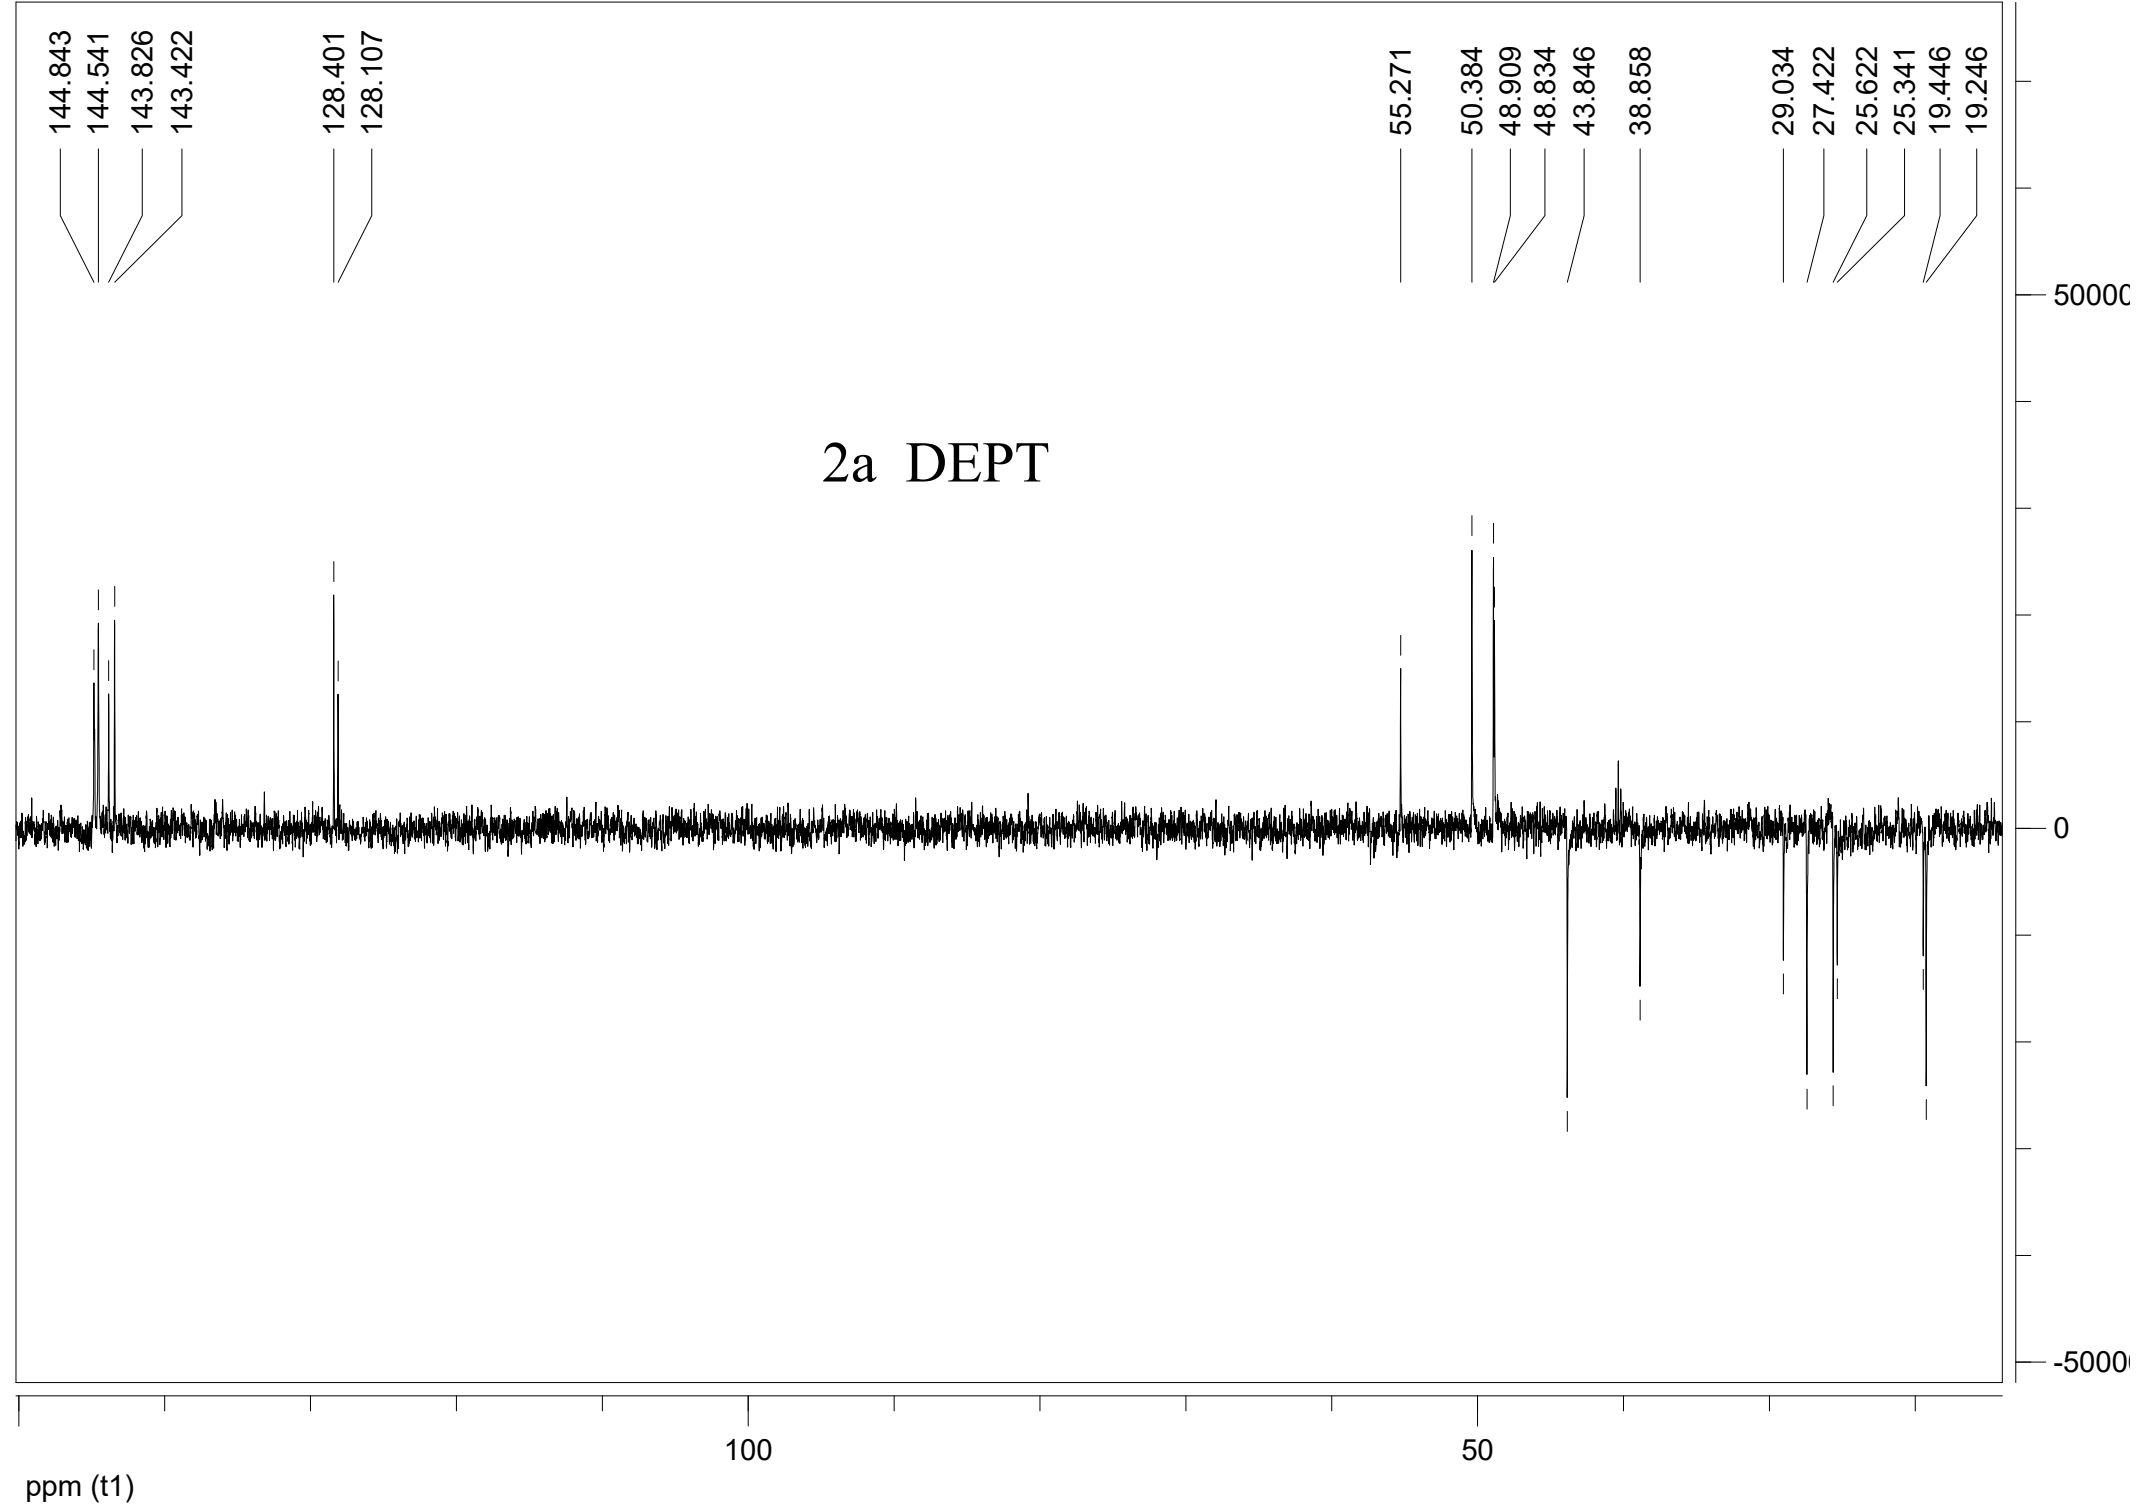

**2b (1H, CDCl3)**

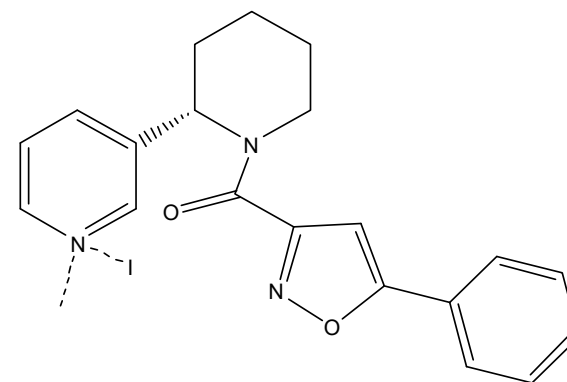

Molecular Weight: 475,33

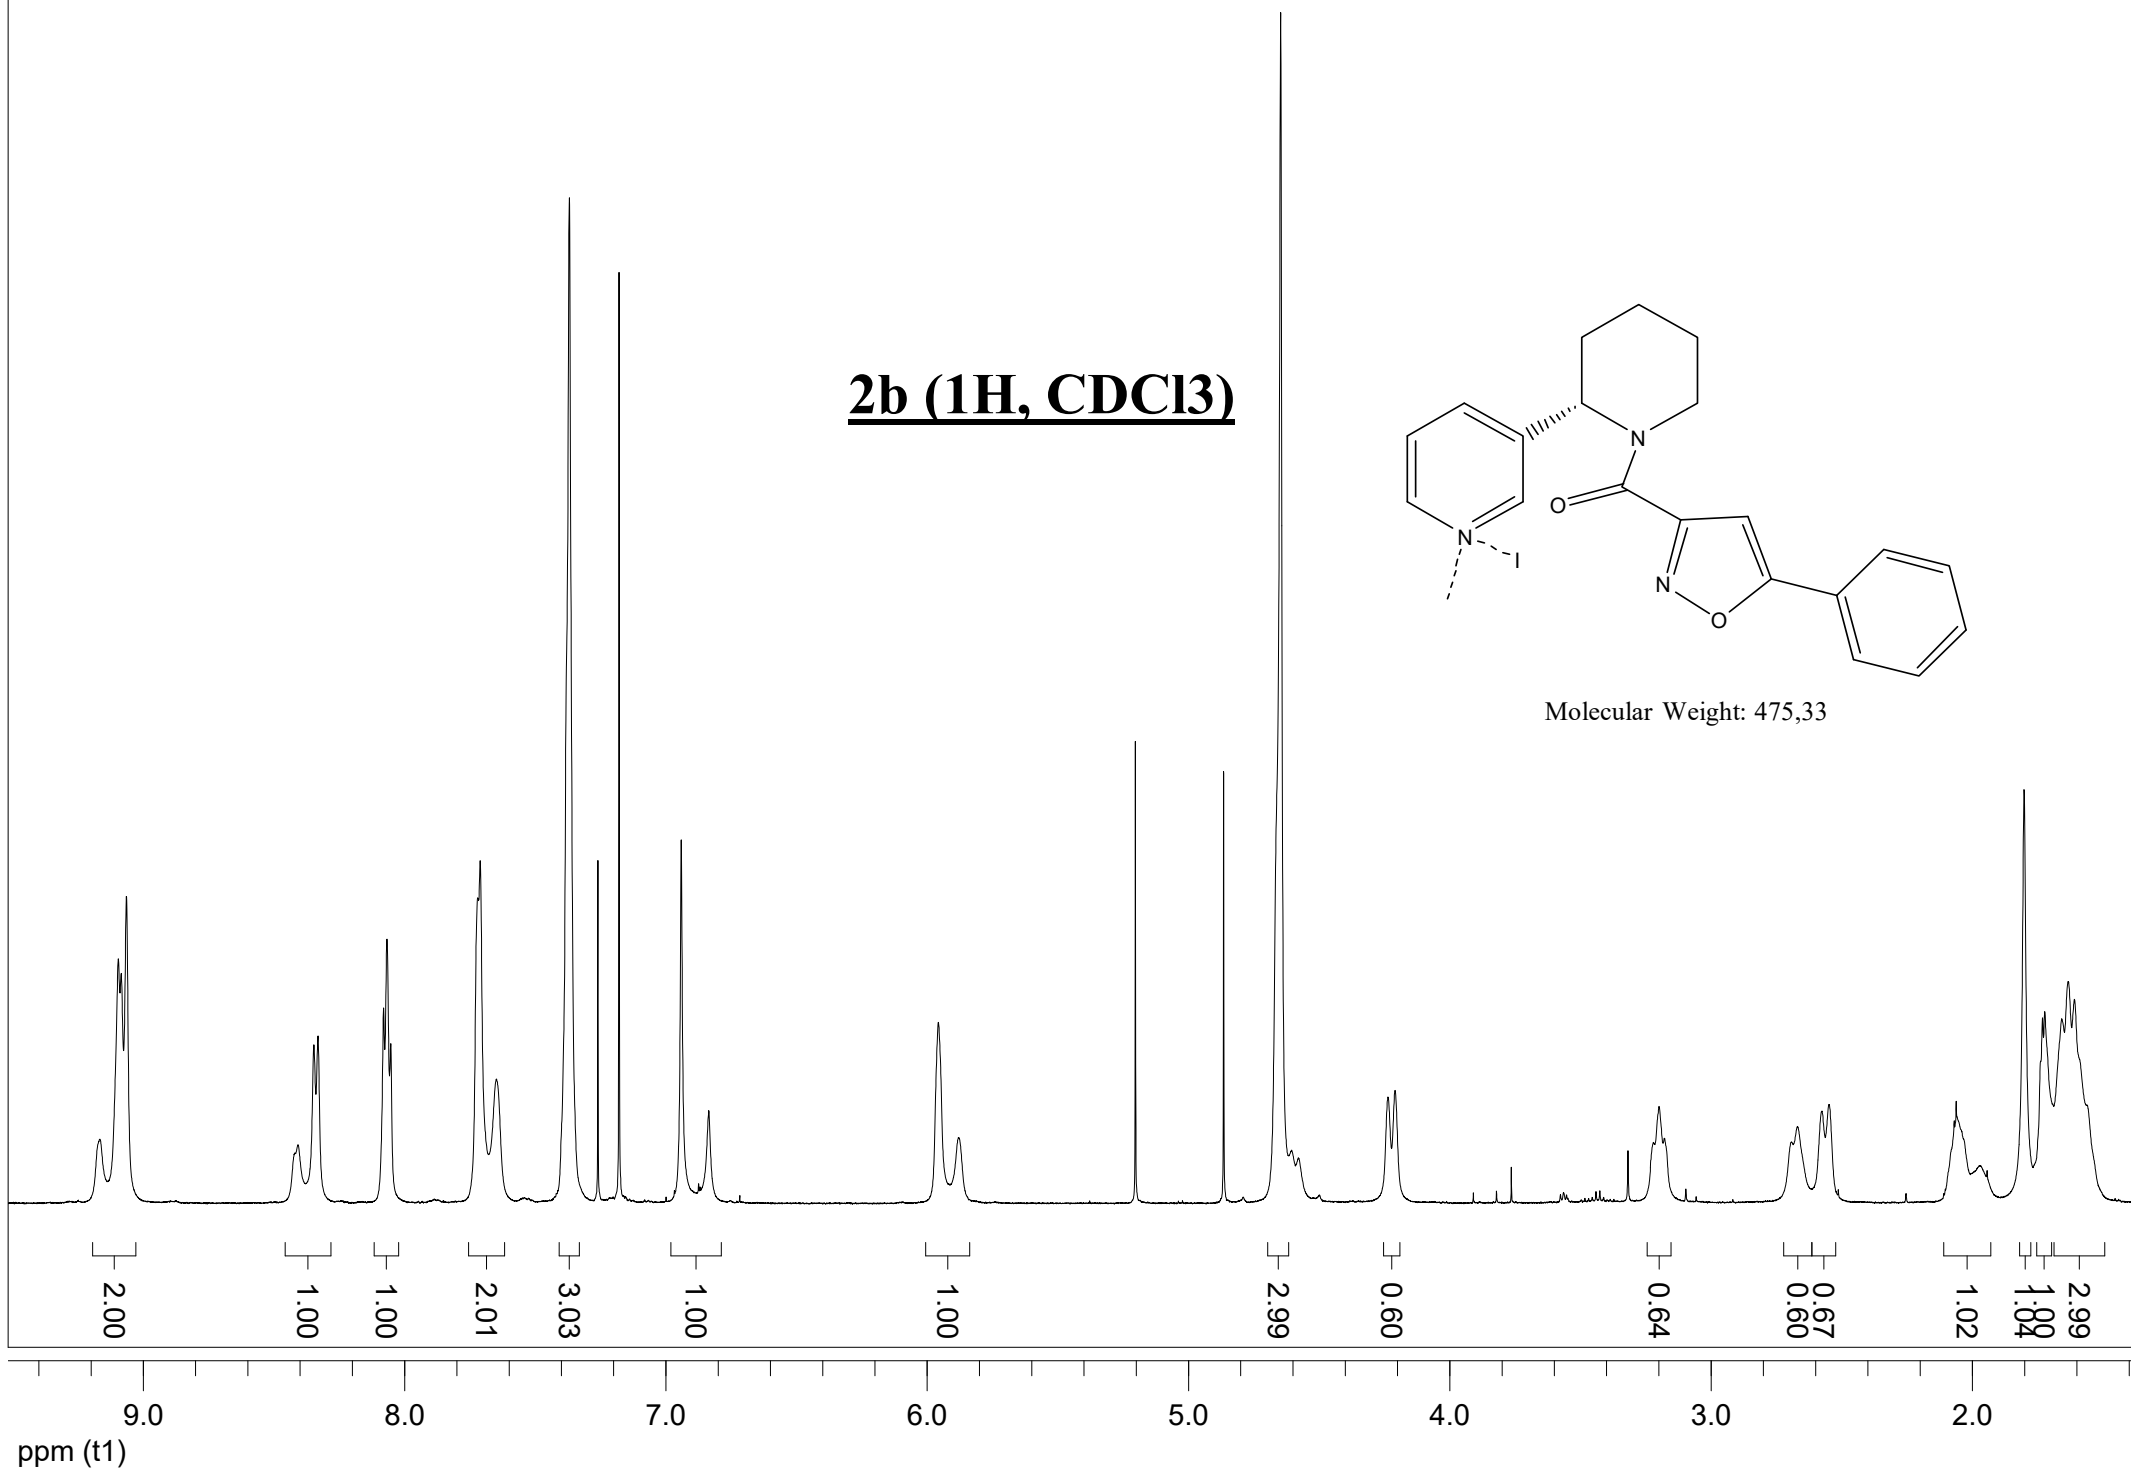

**2b (13C, CDCl3)**

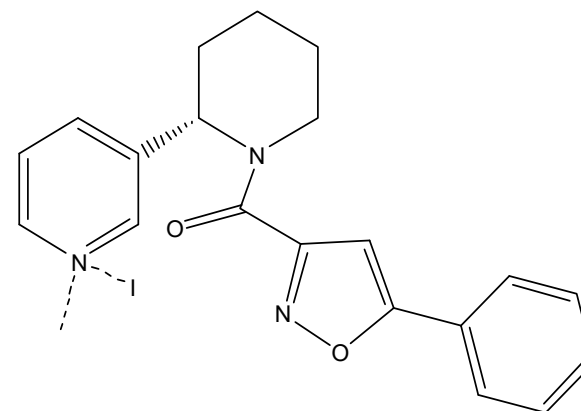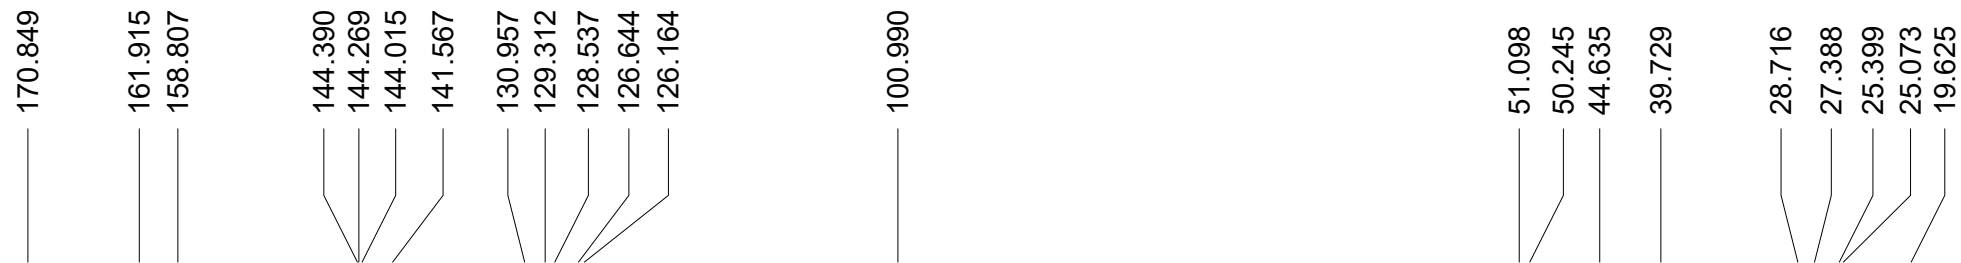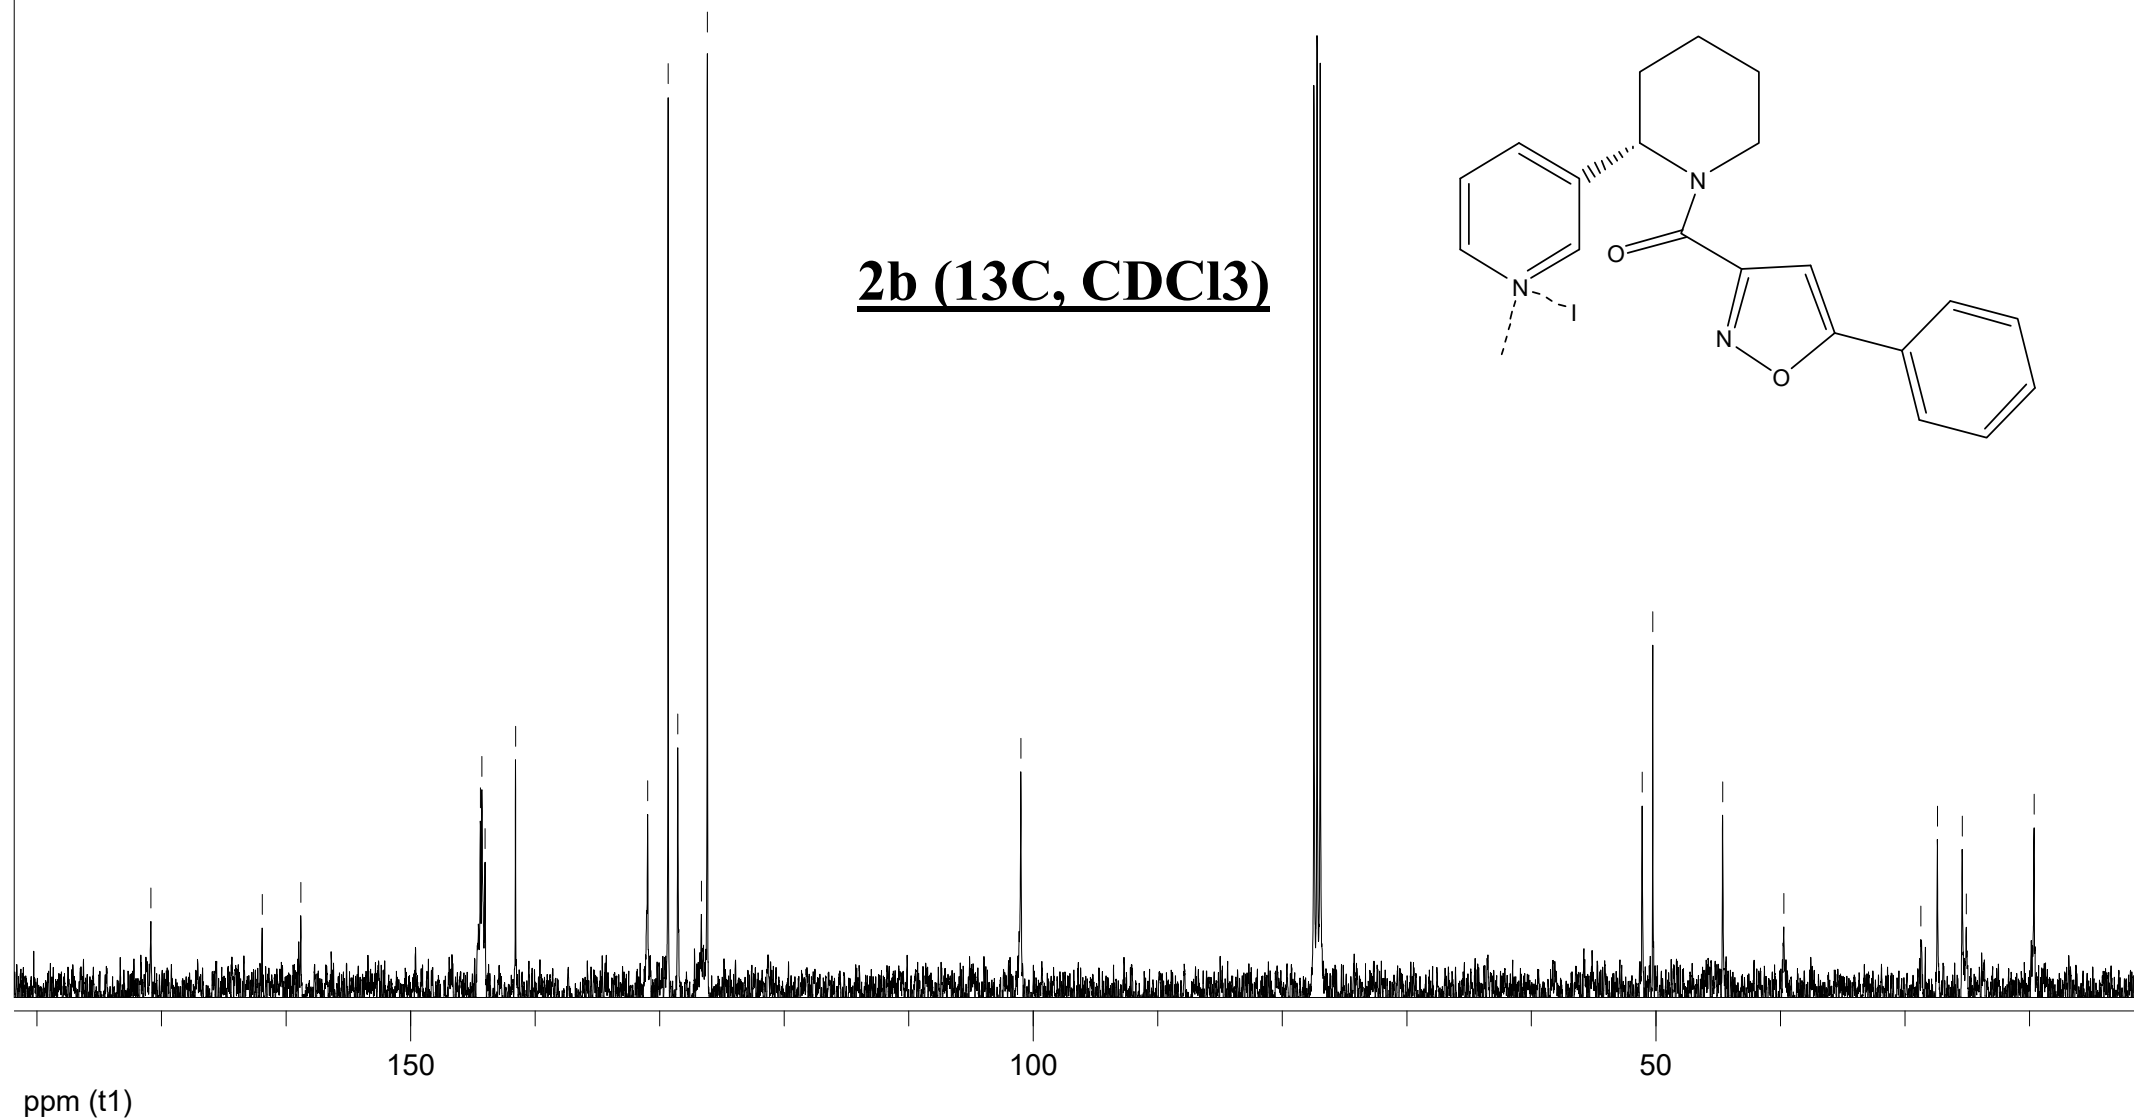

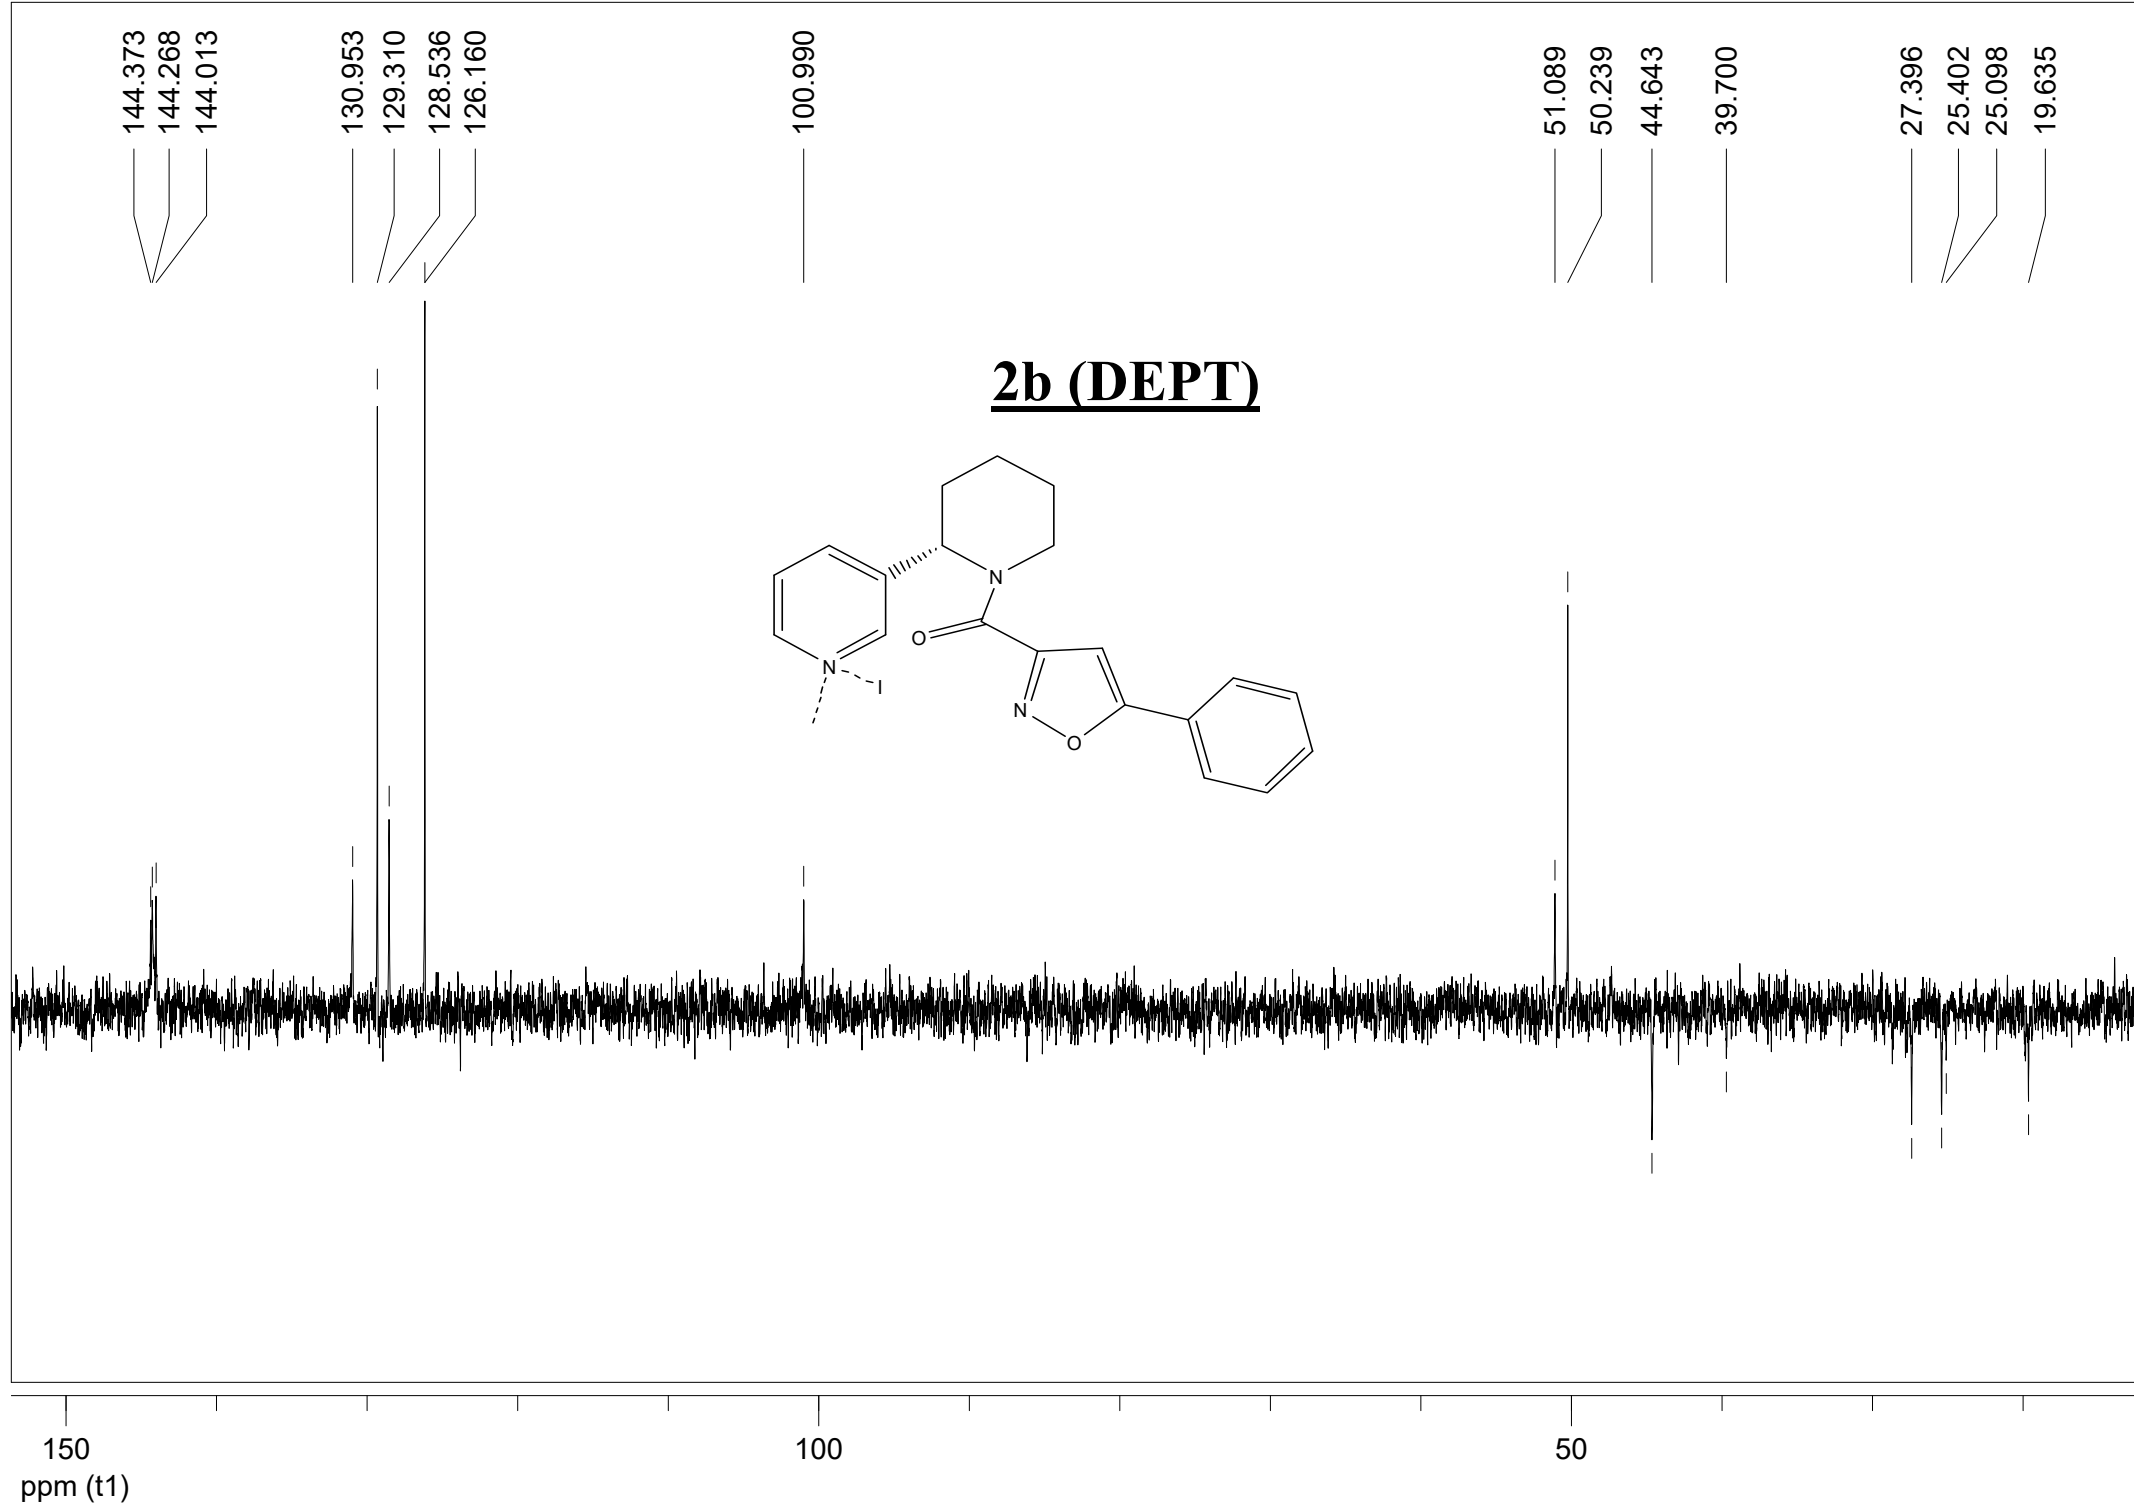

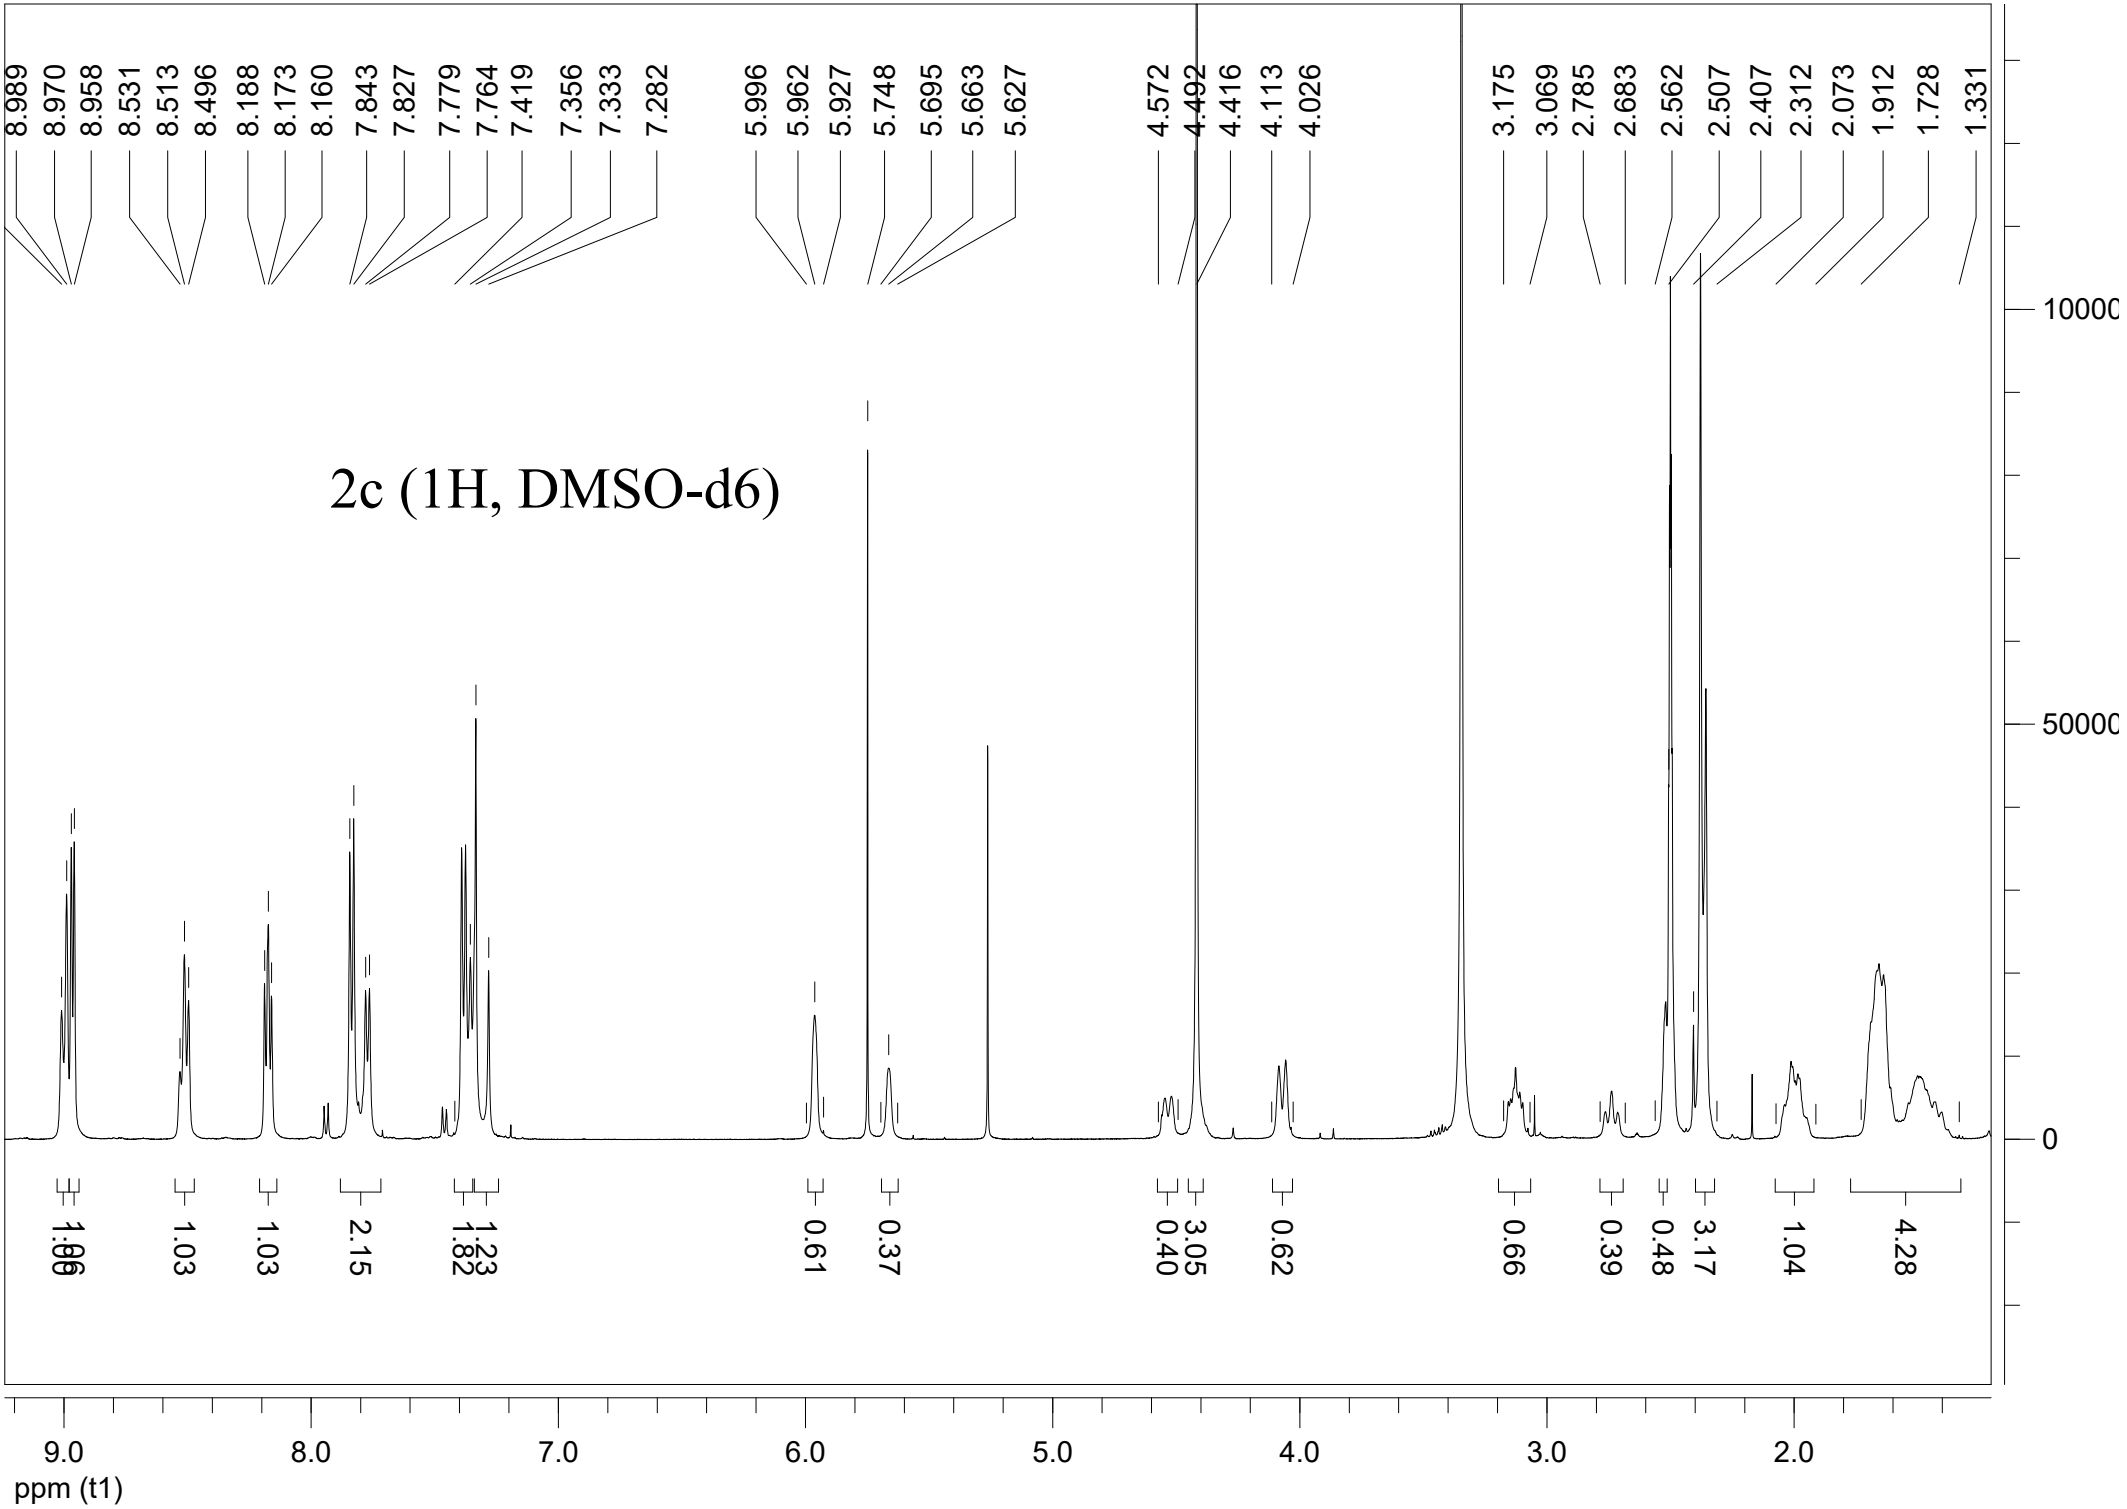

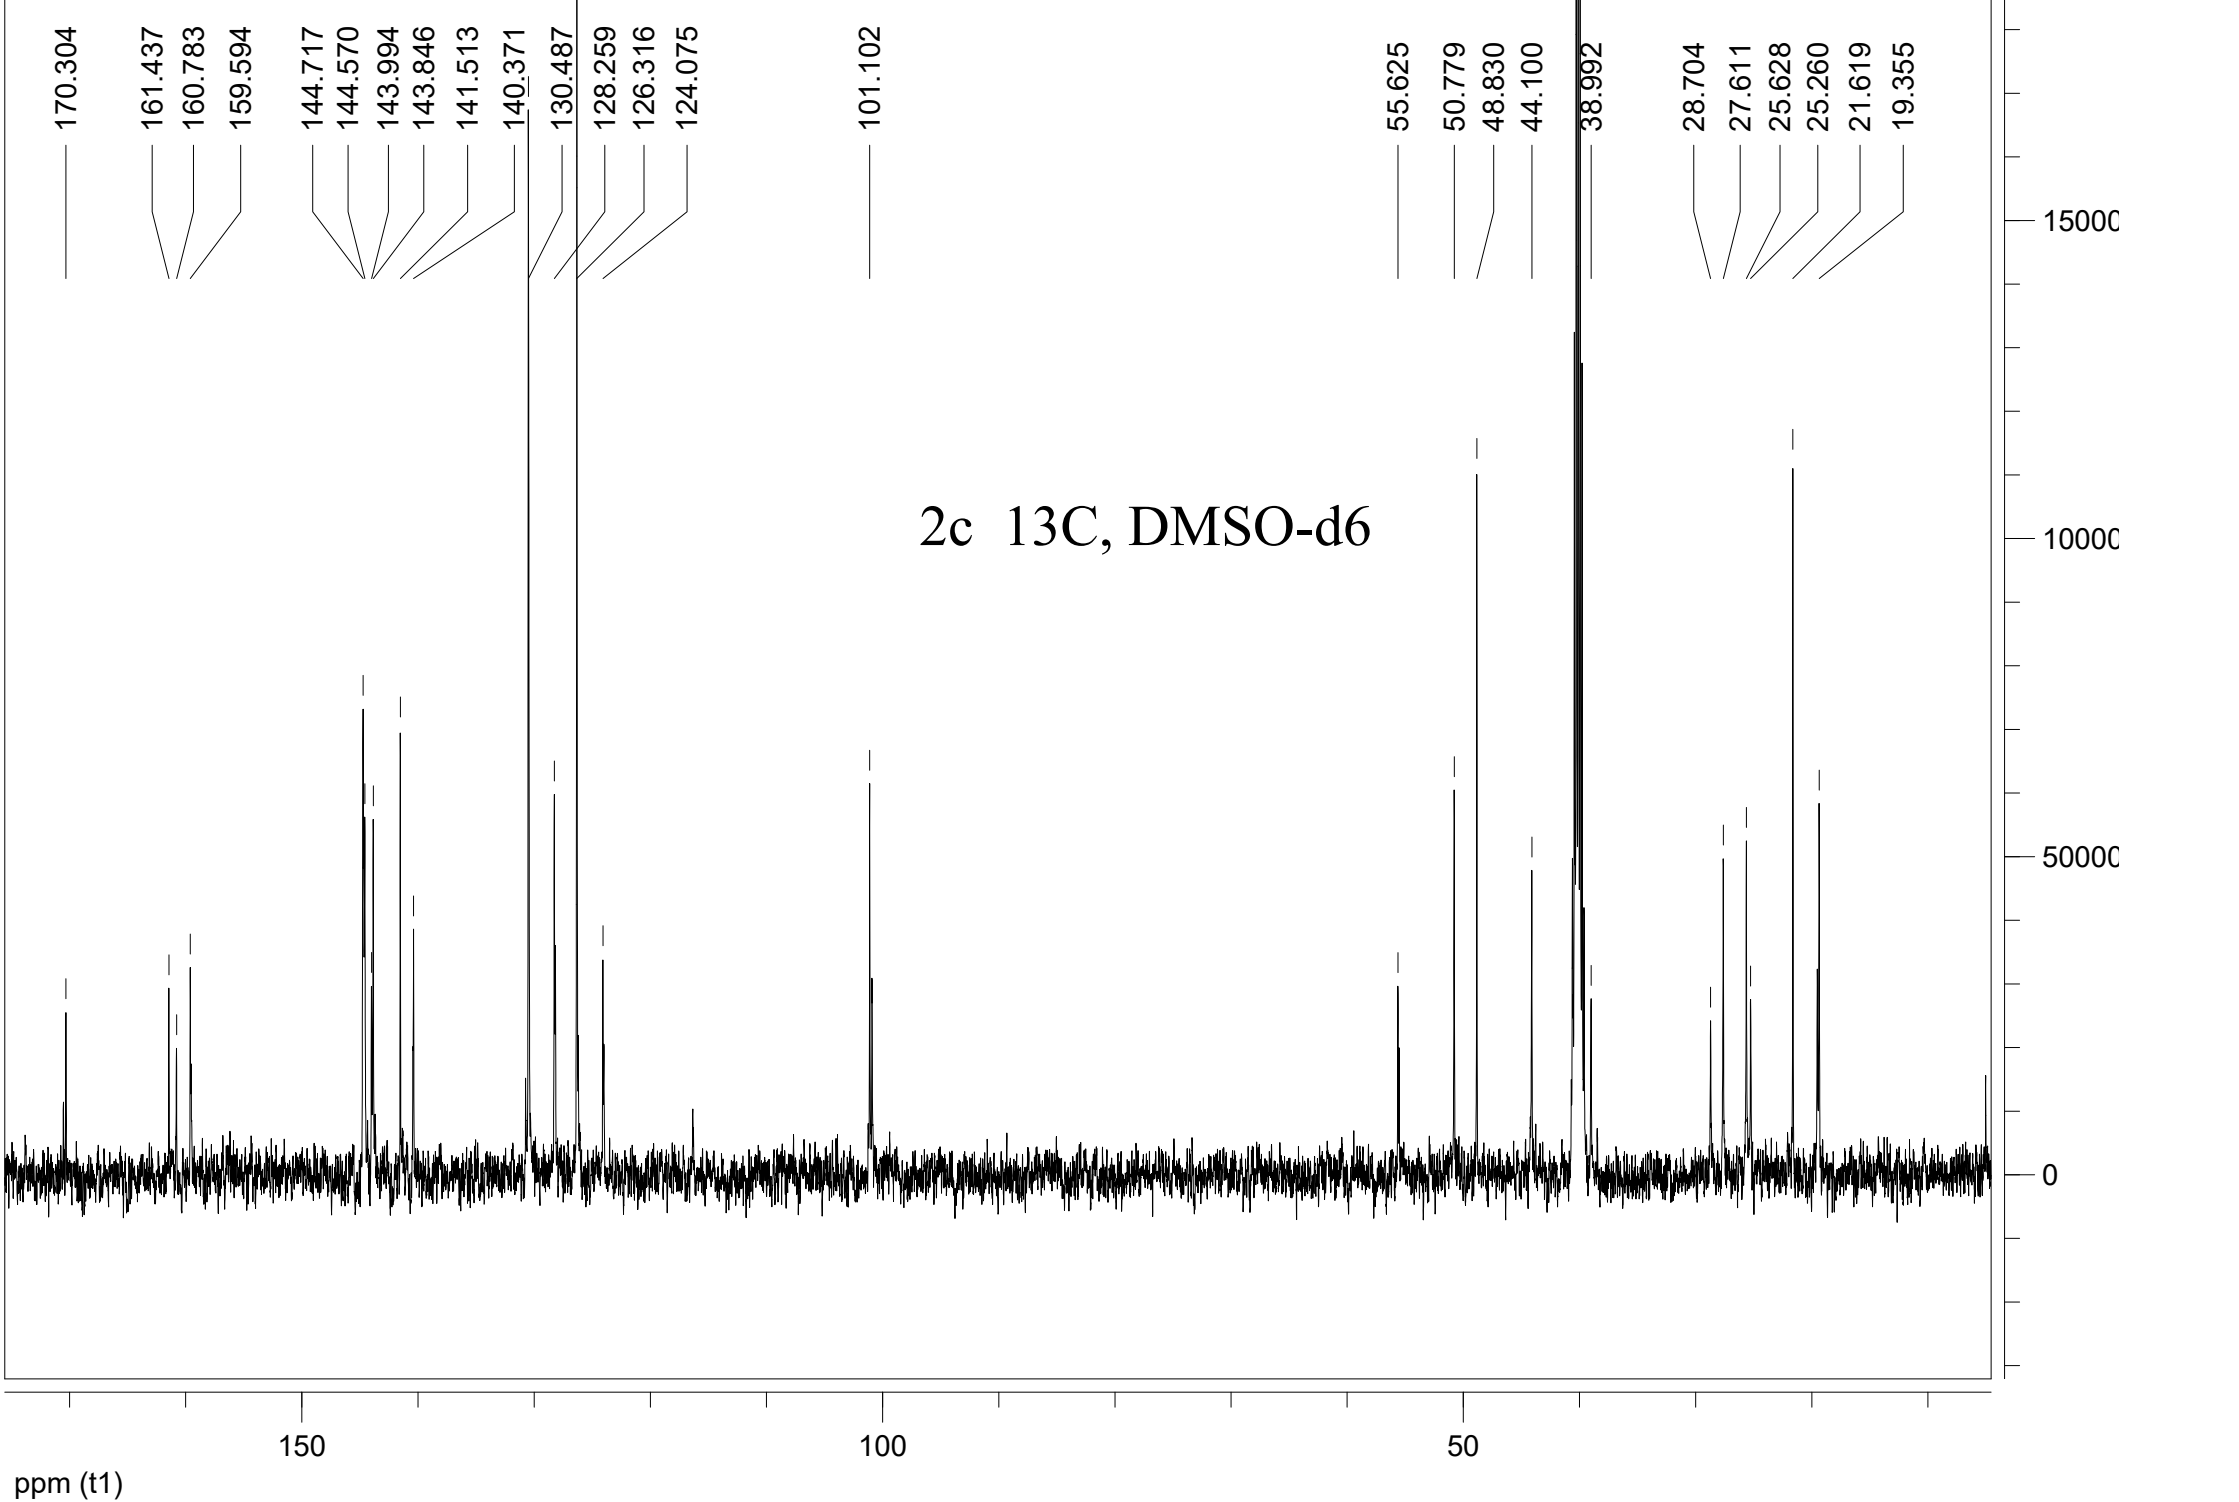

2c DEPT

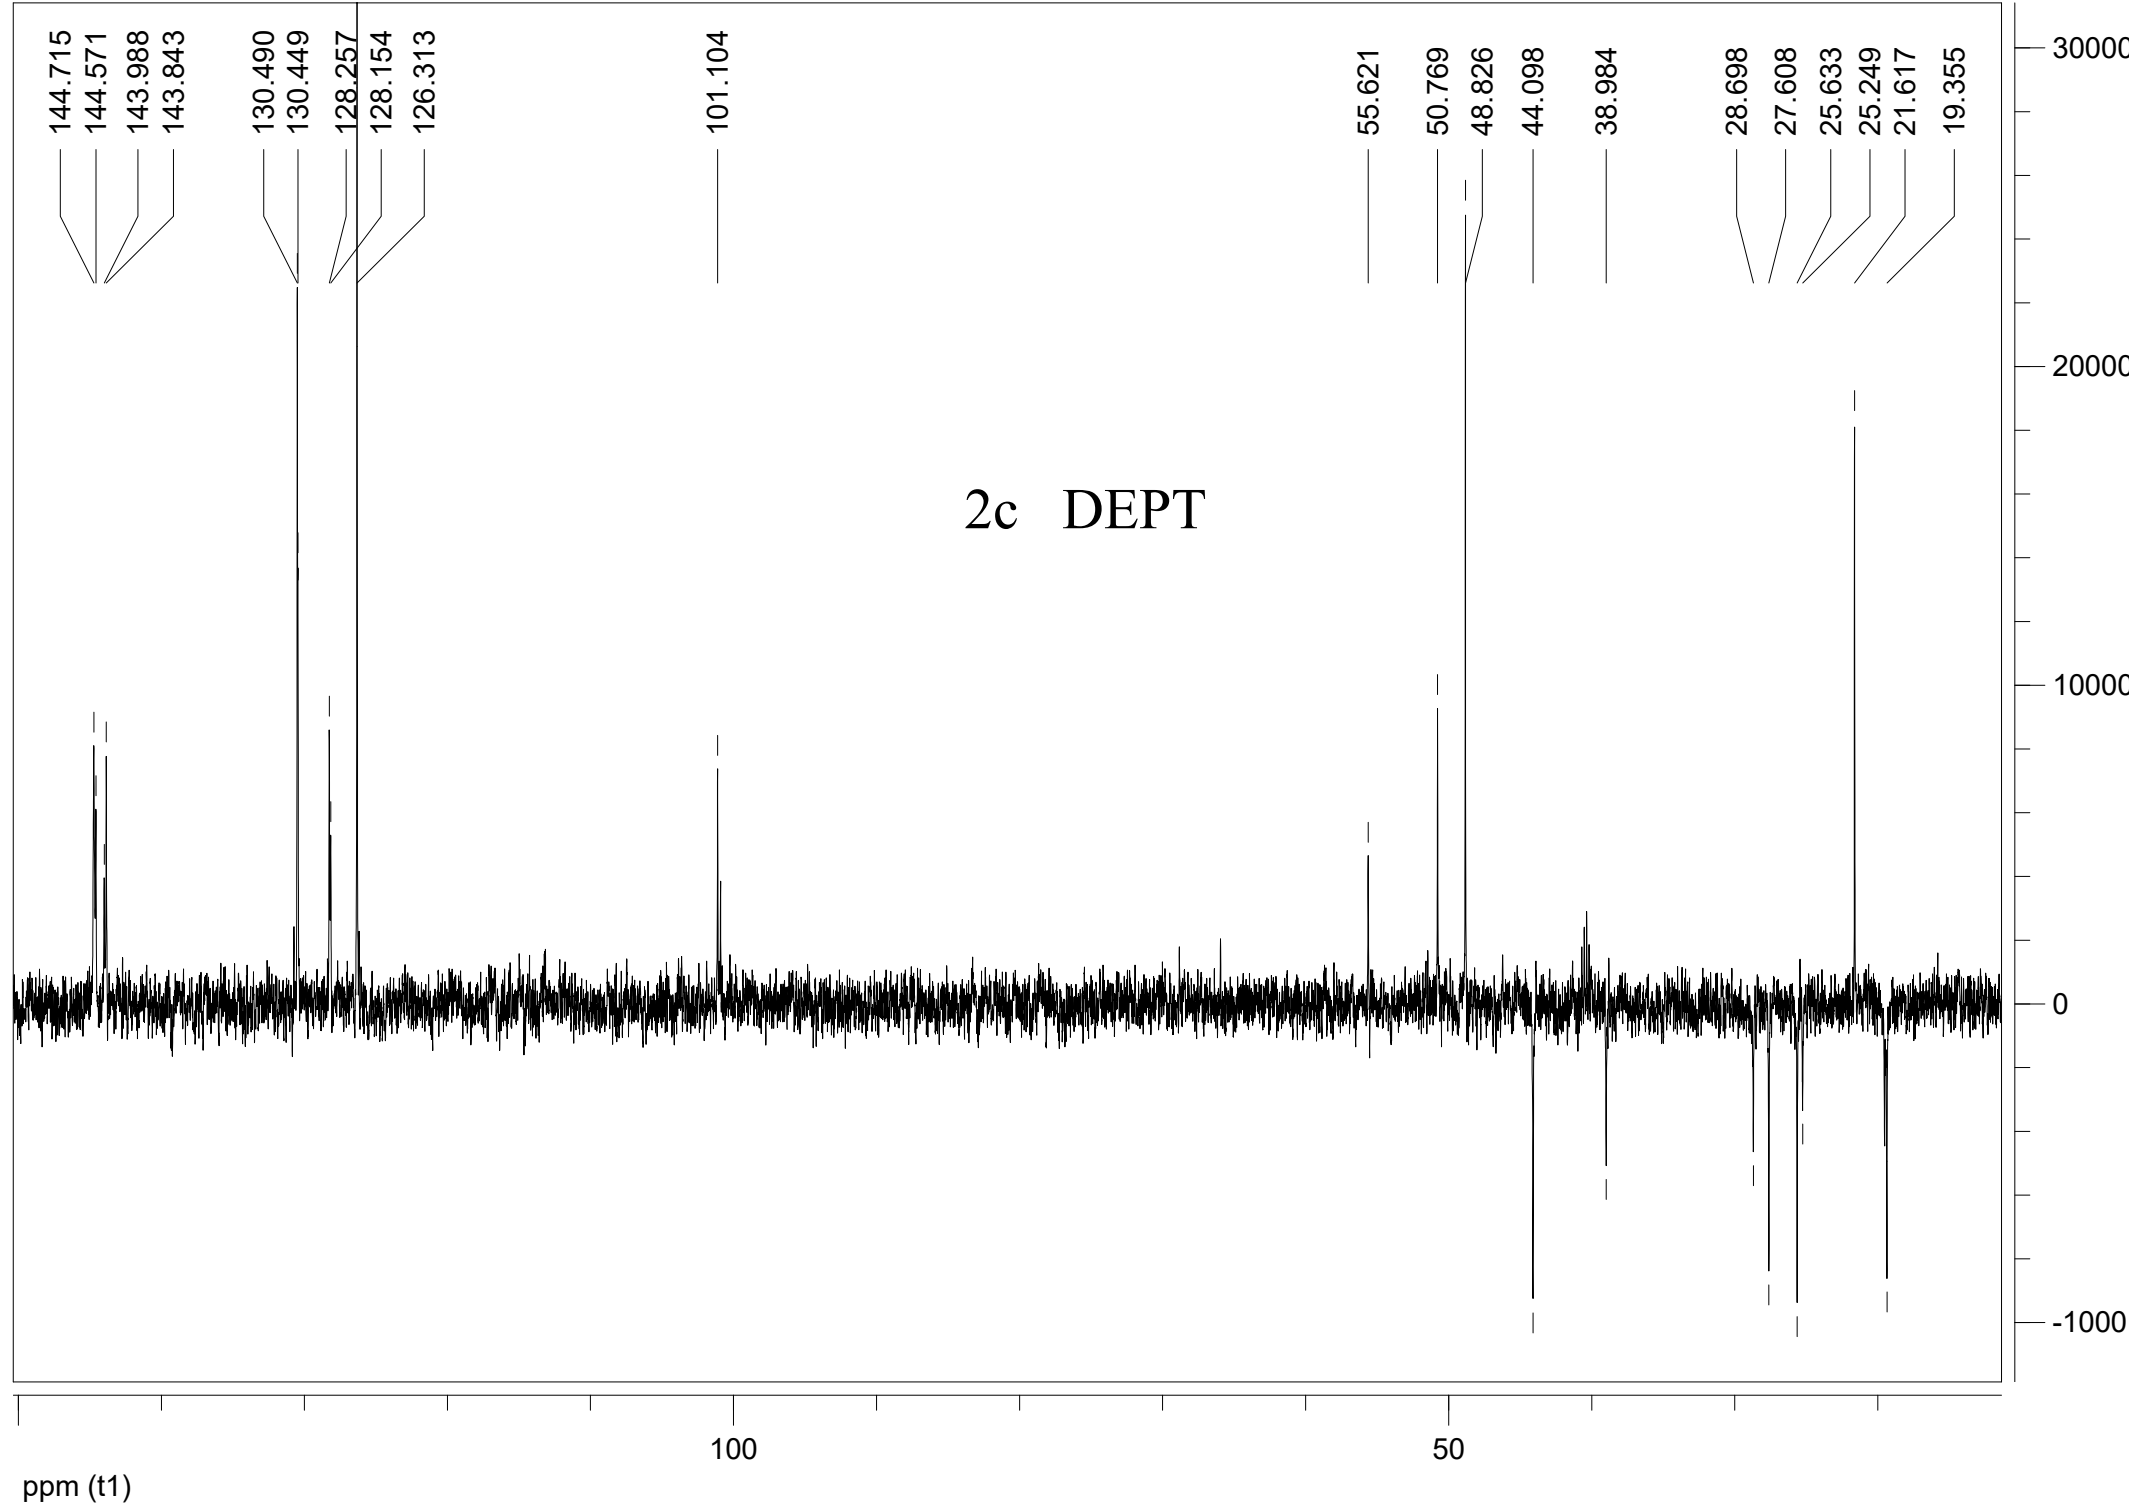

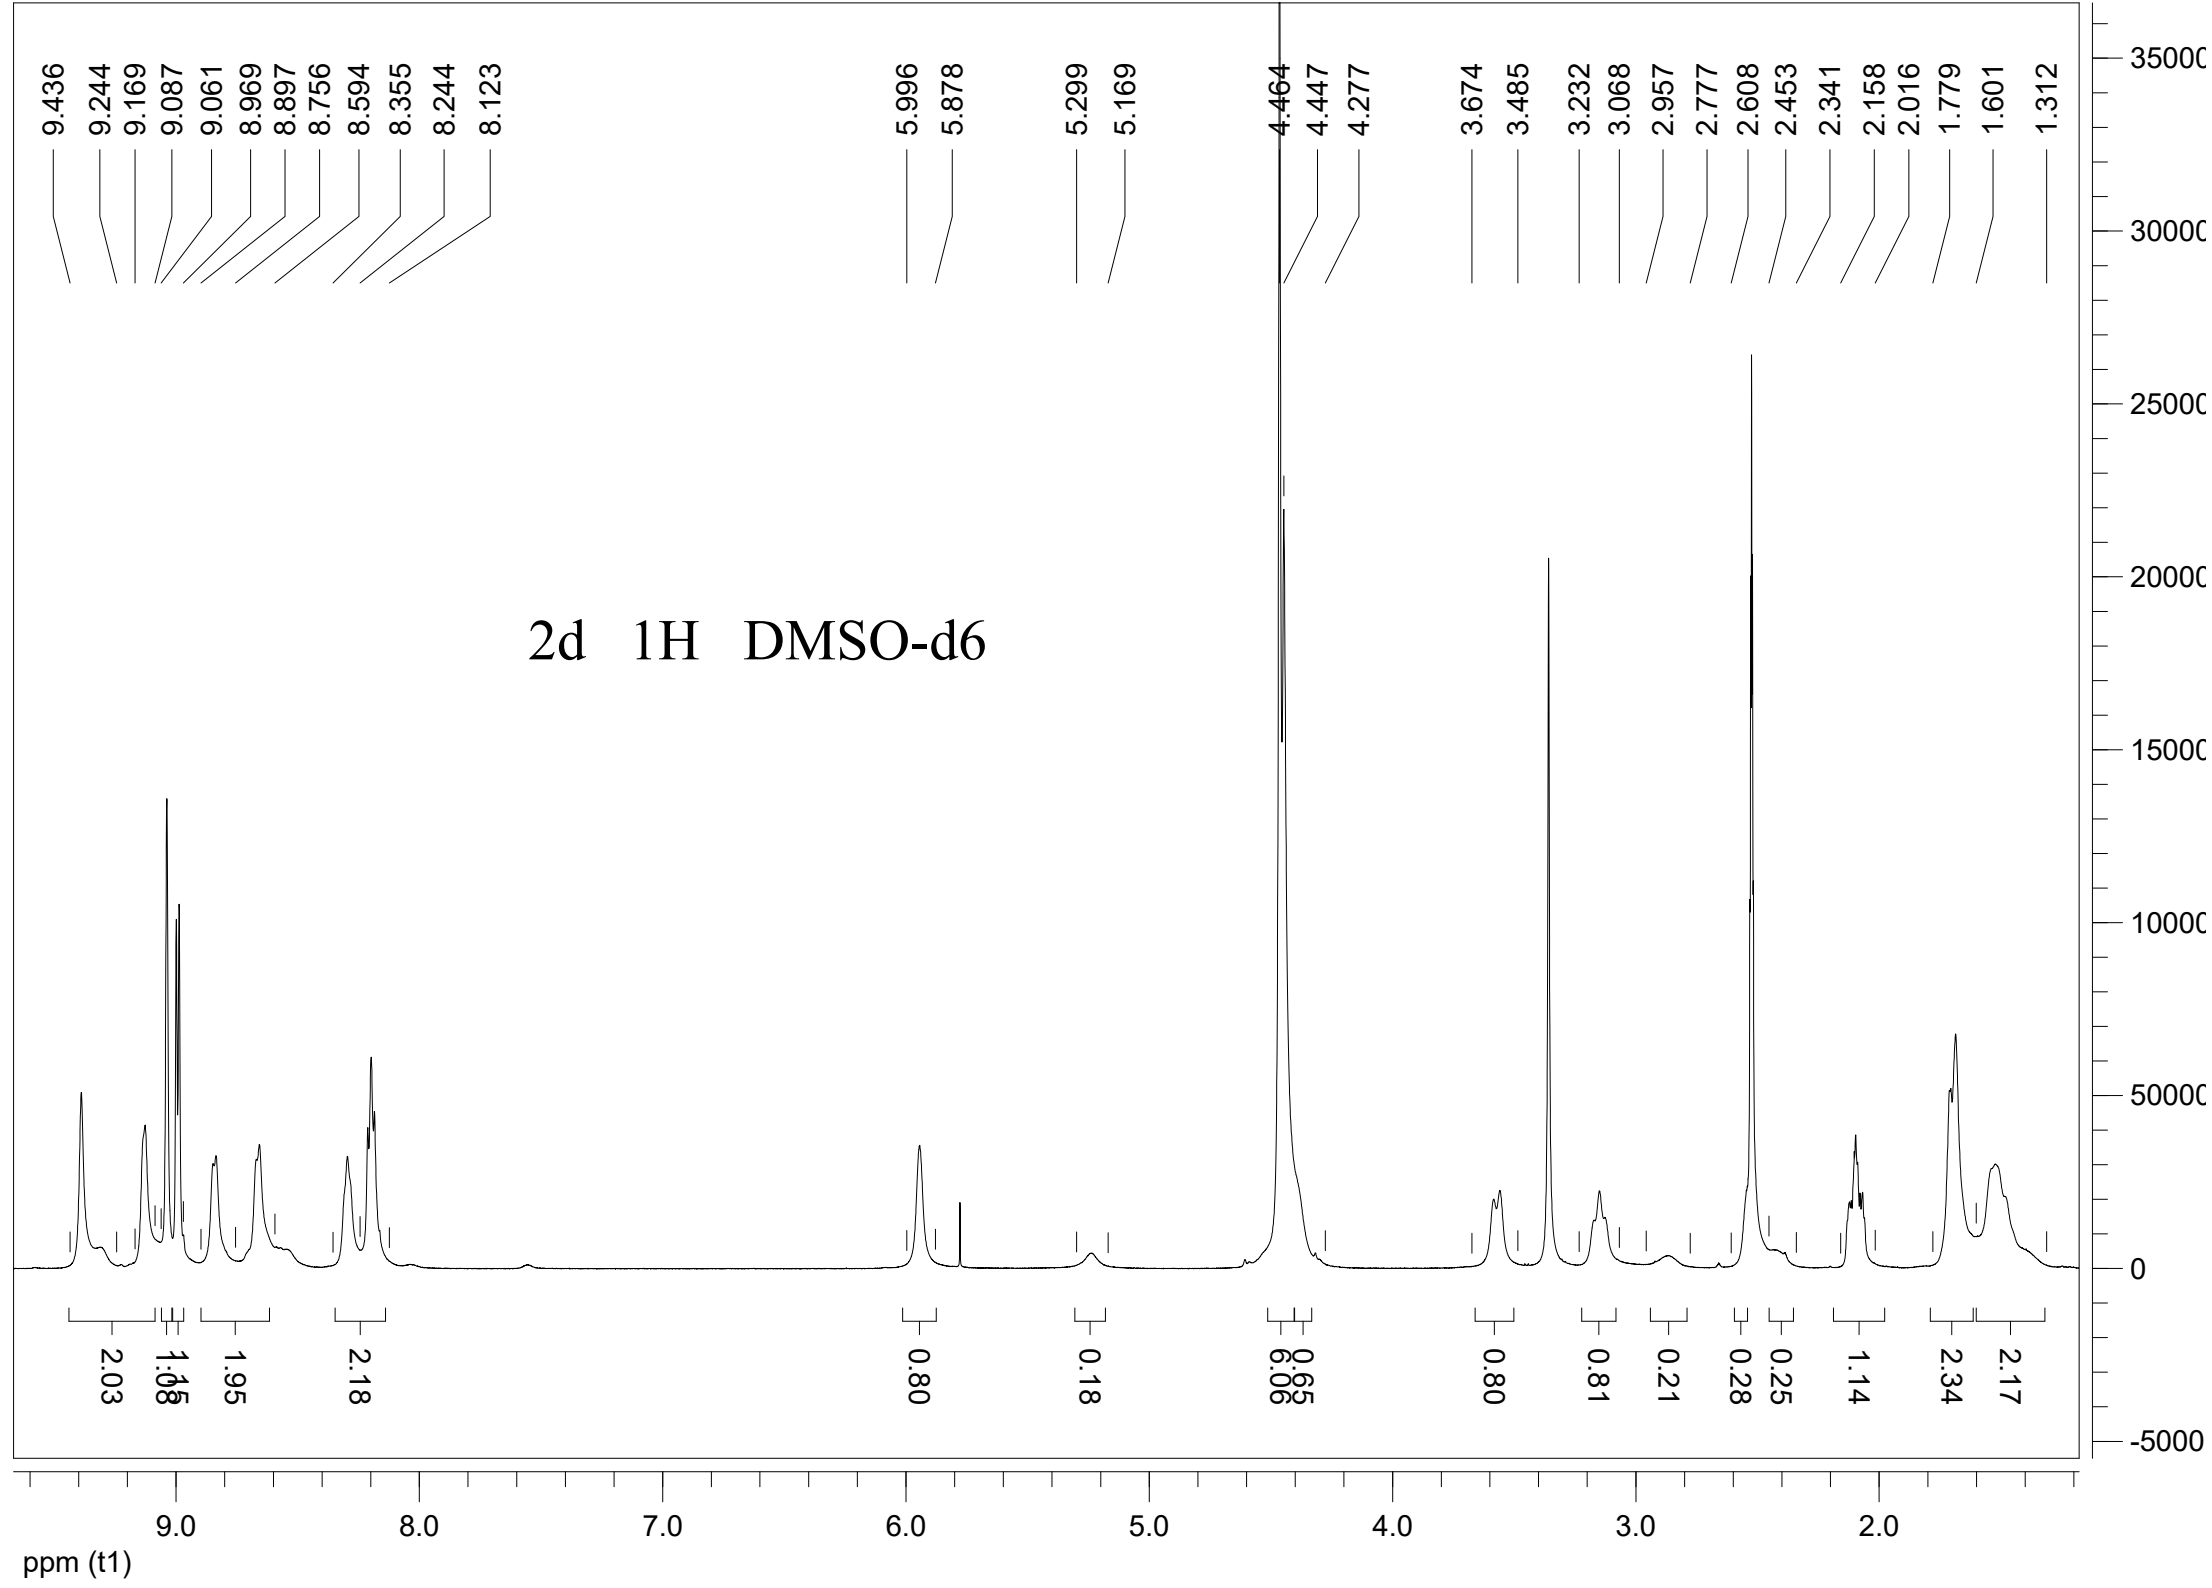



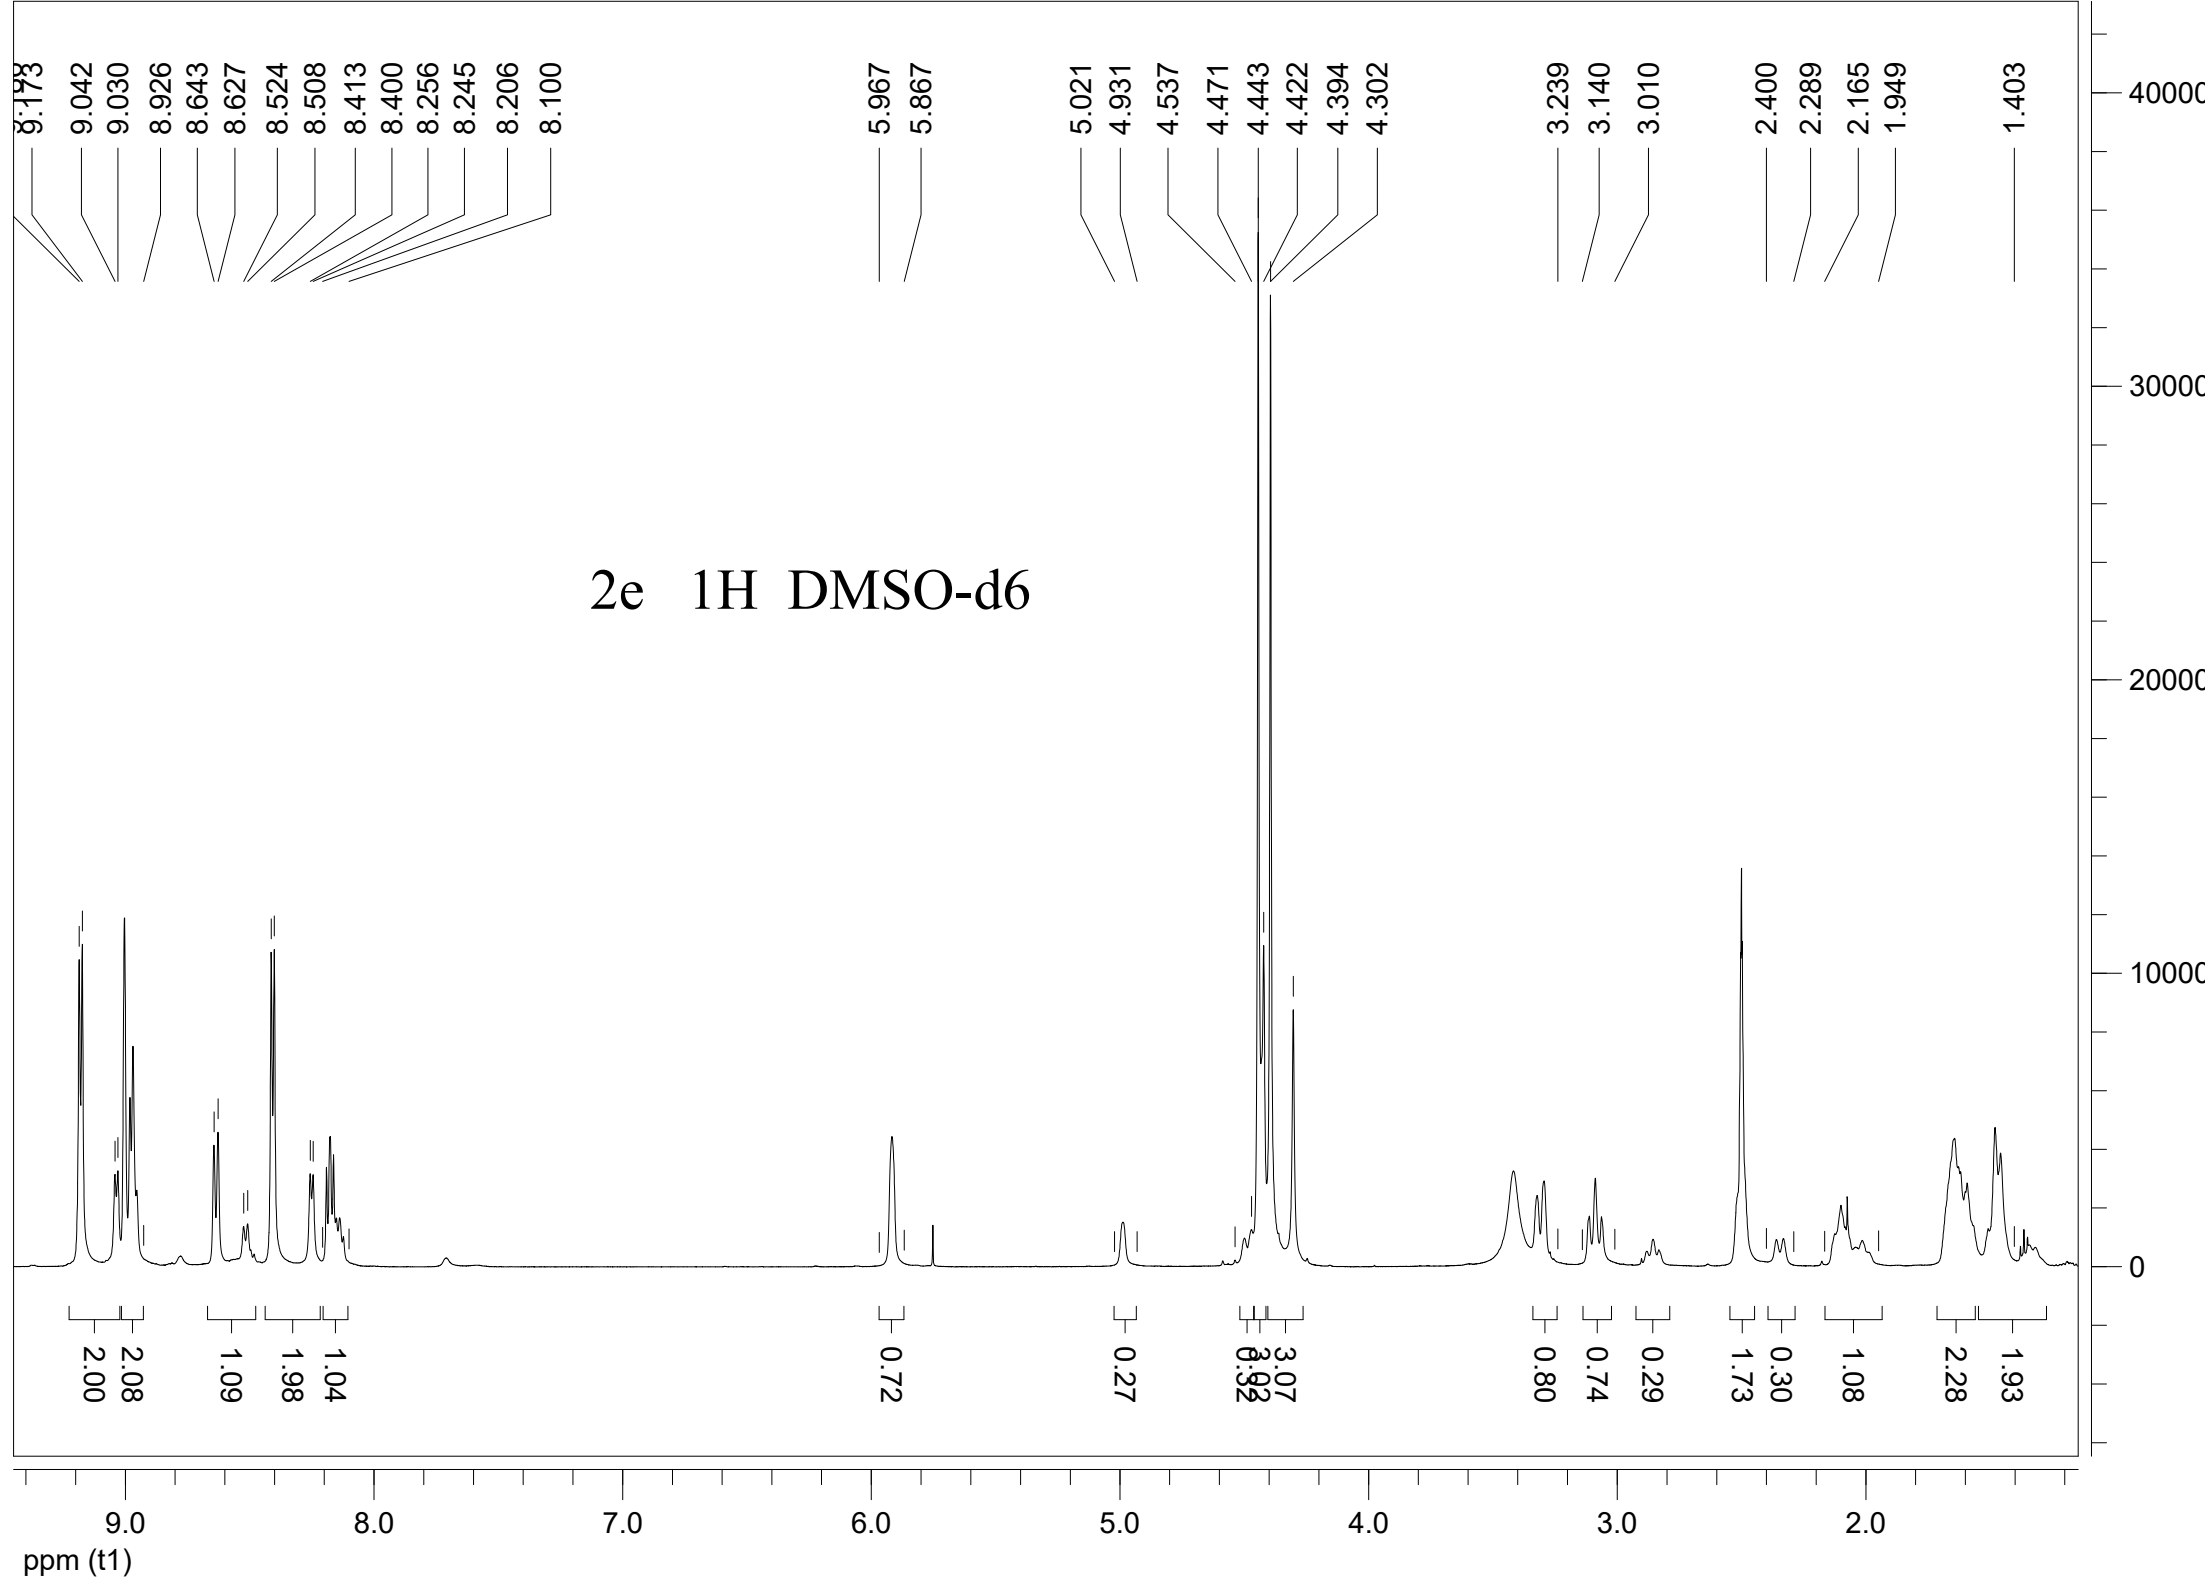

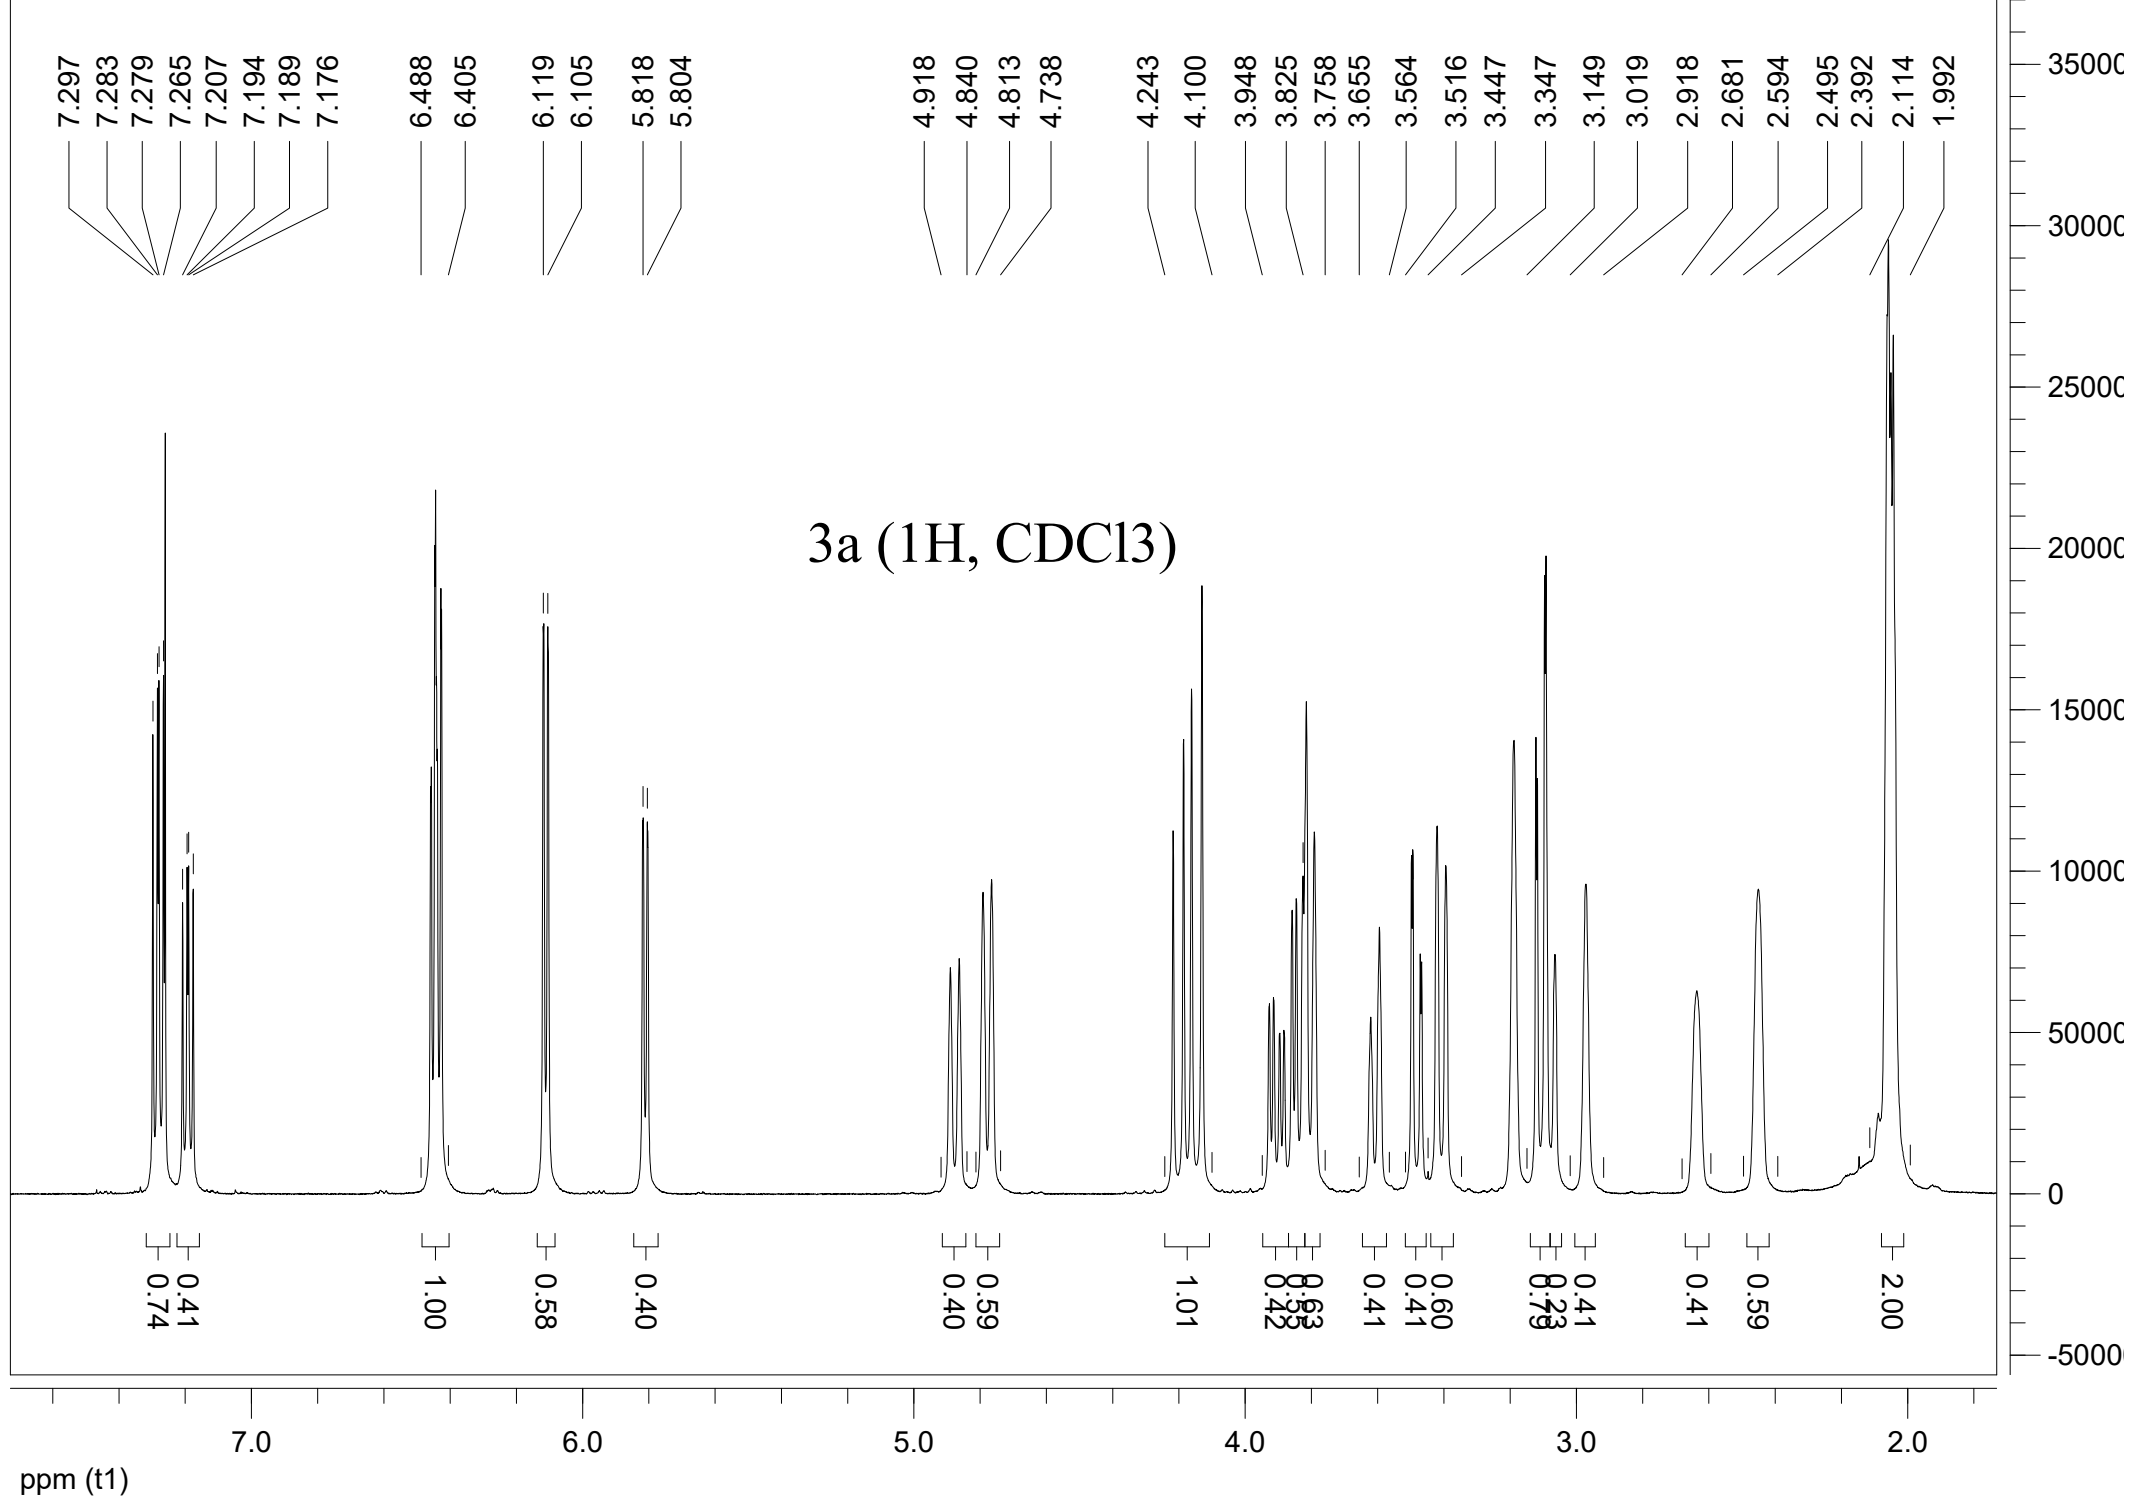

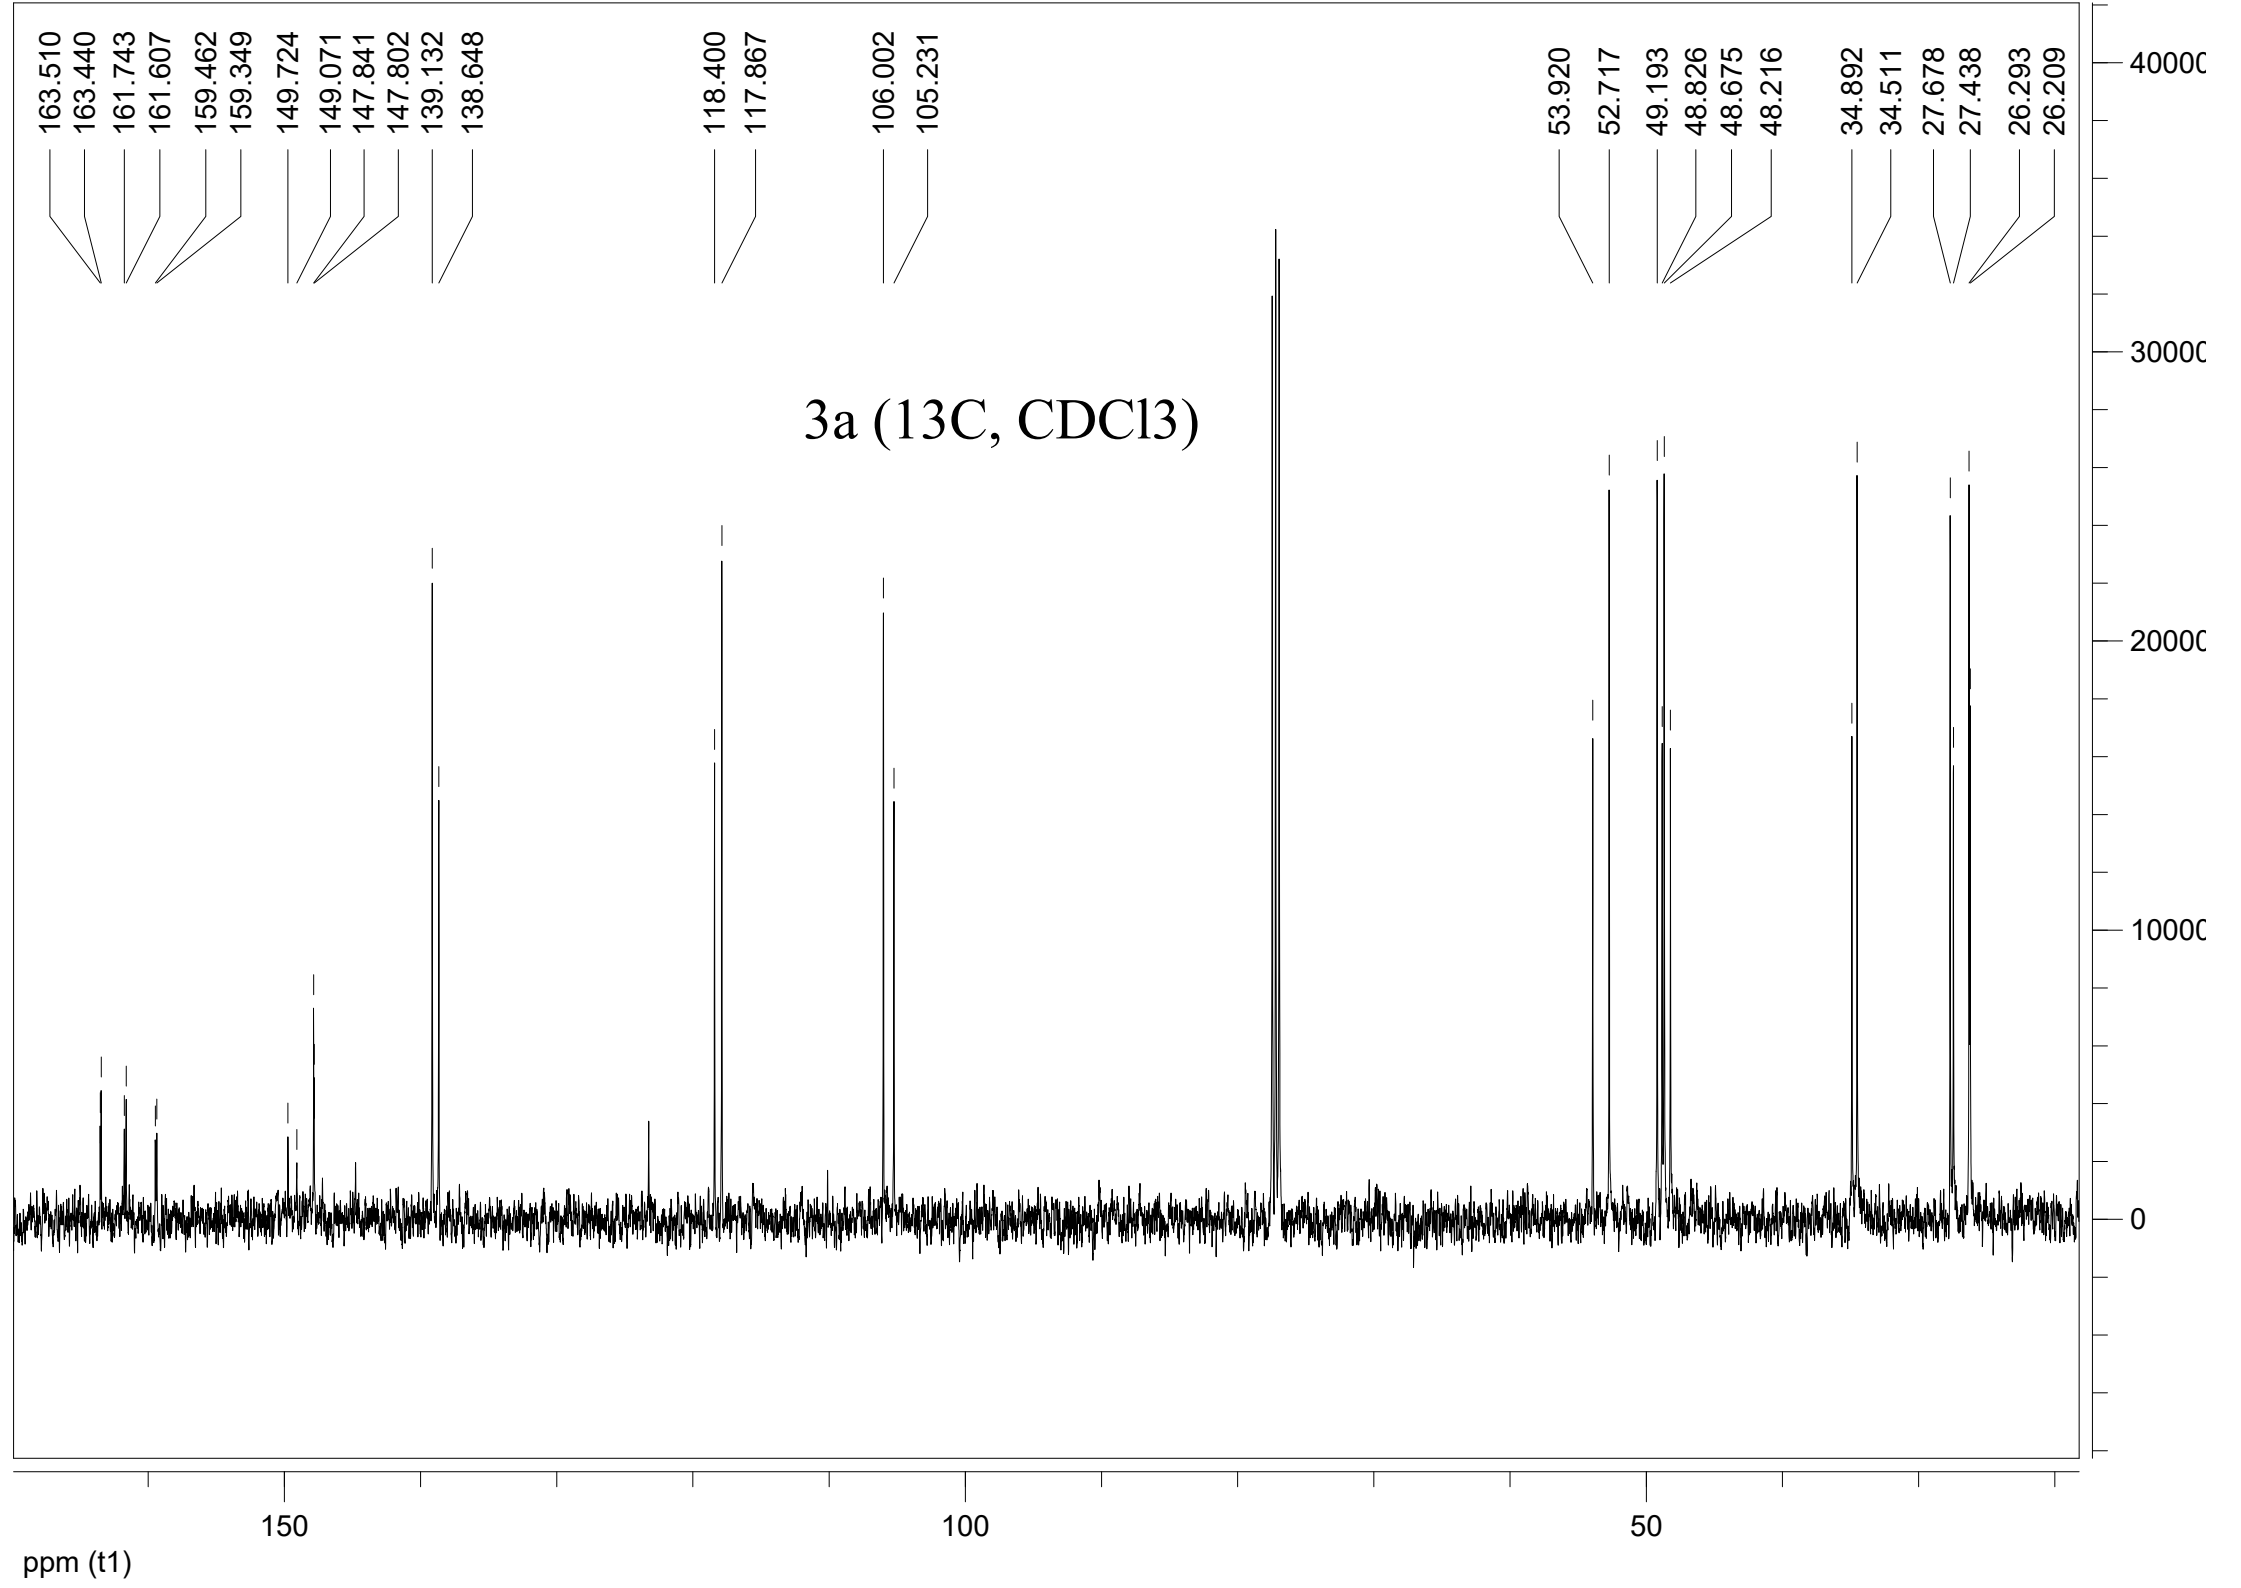

# 3a (DEPT)

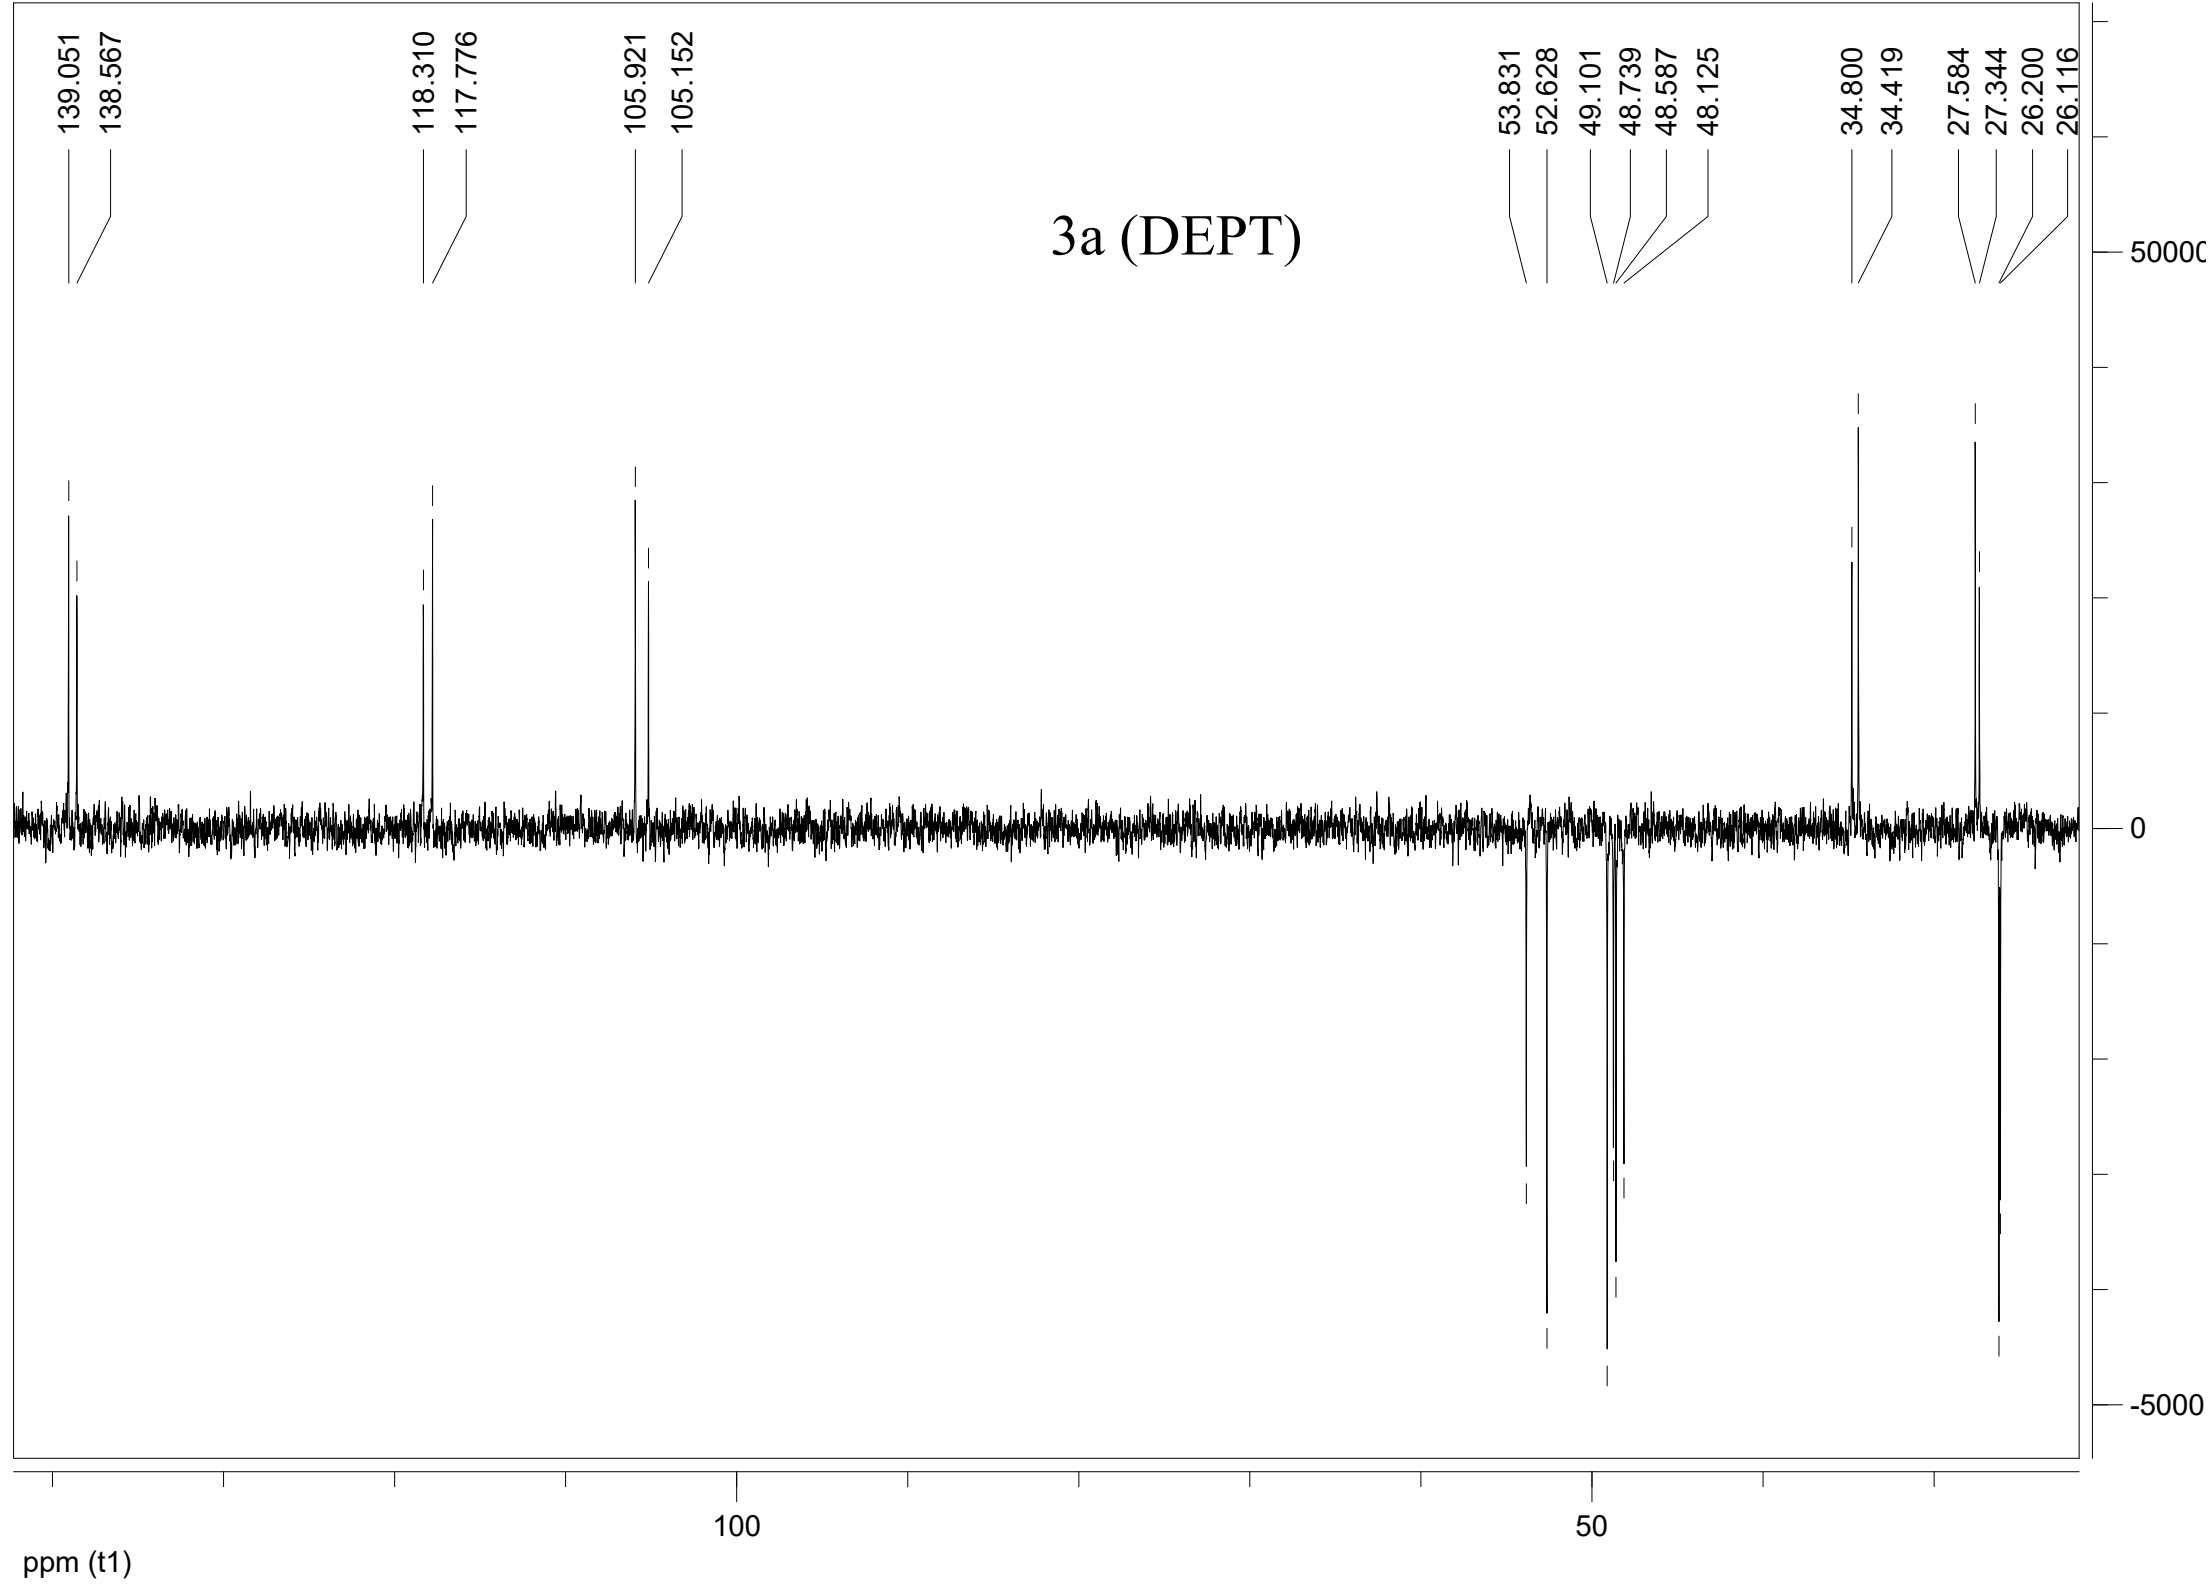

**3b**  
**in CDCl<sub>3</sub>**

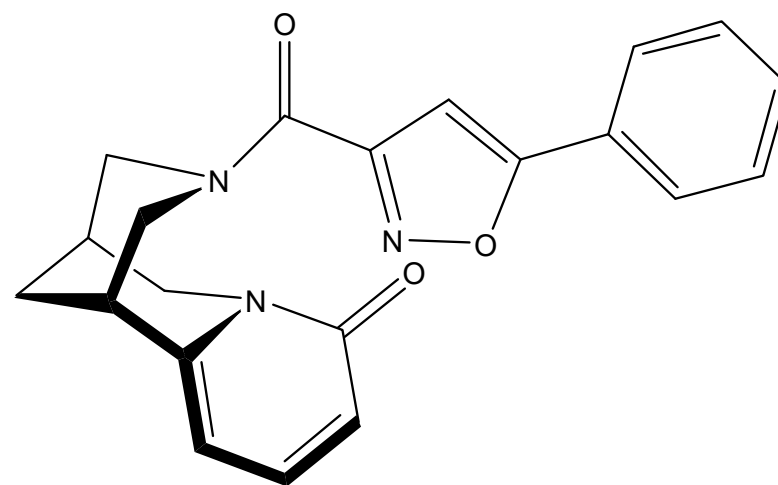

Molecular Weight: 361,40

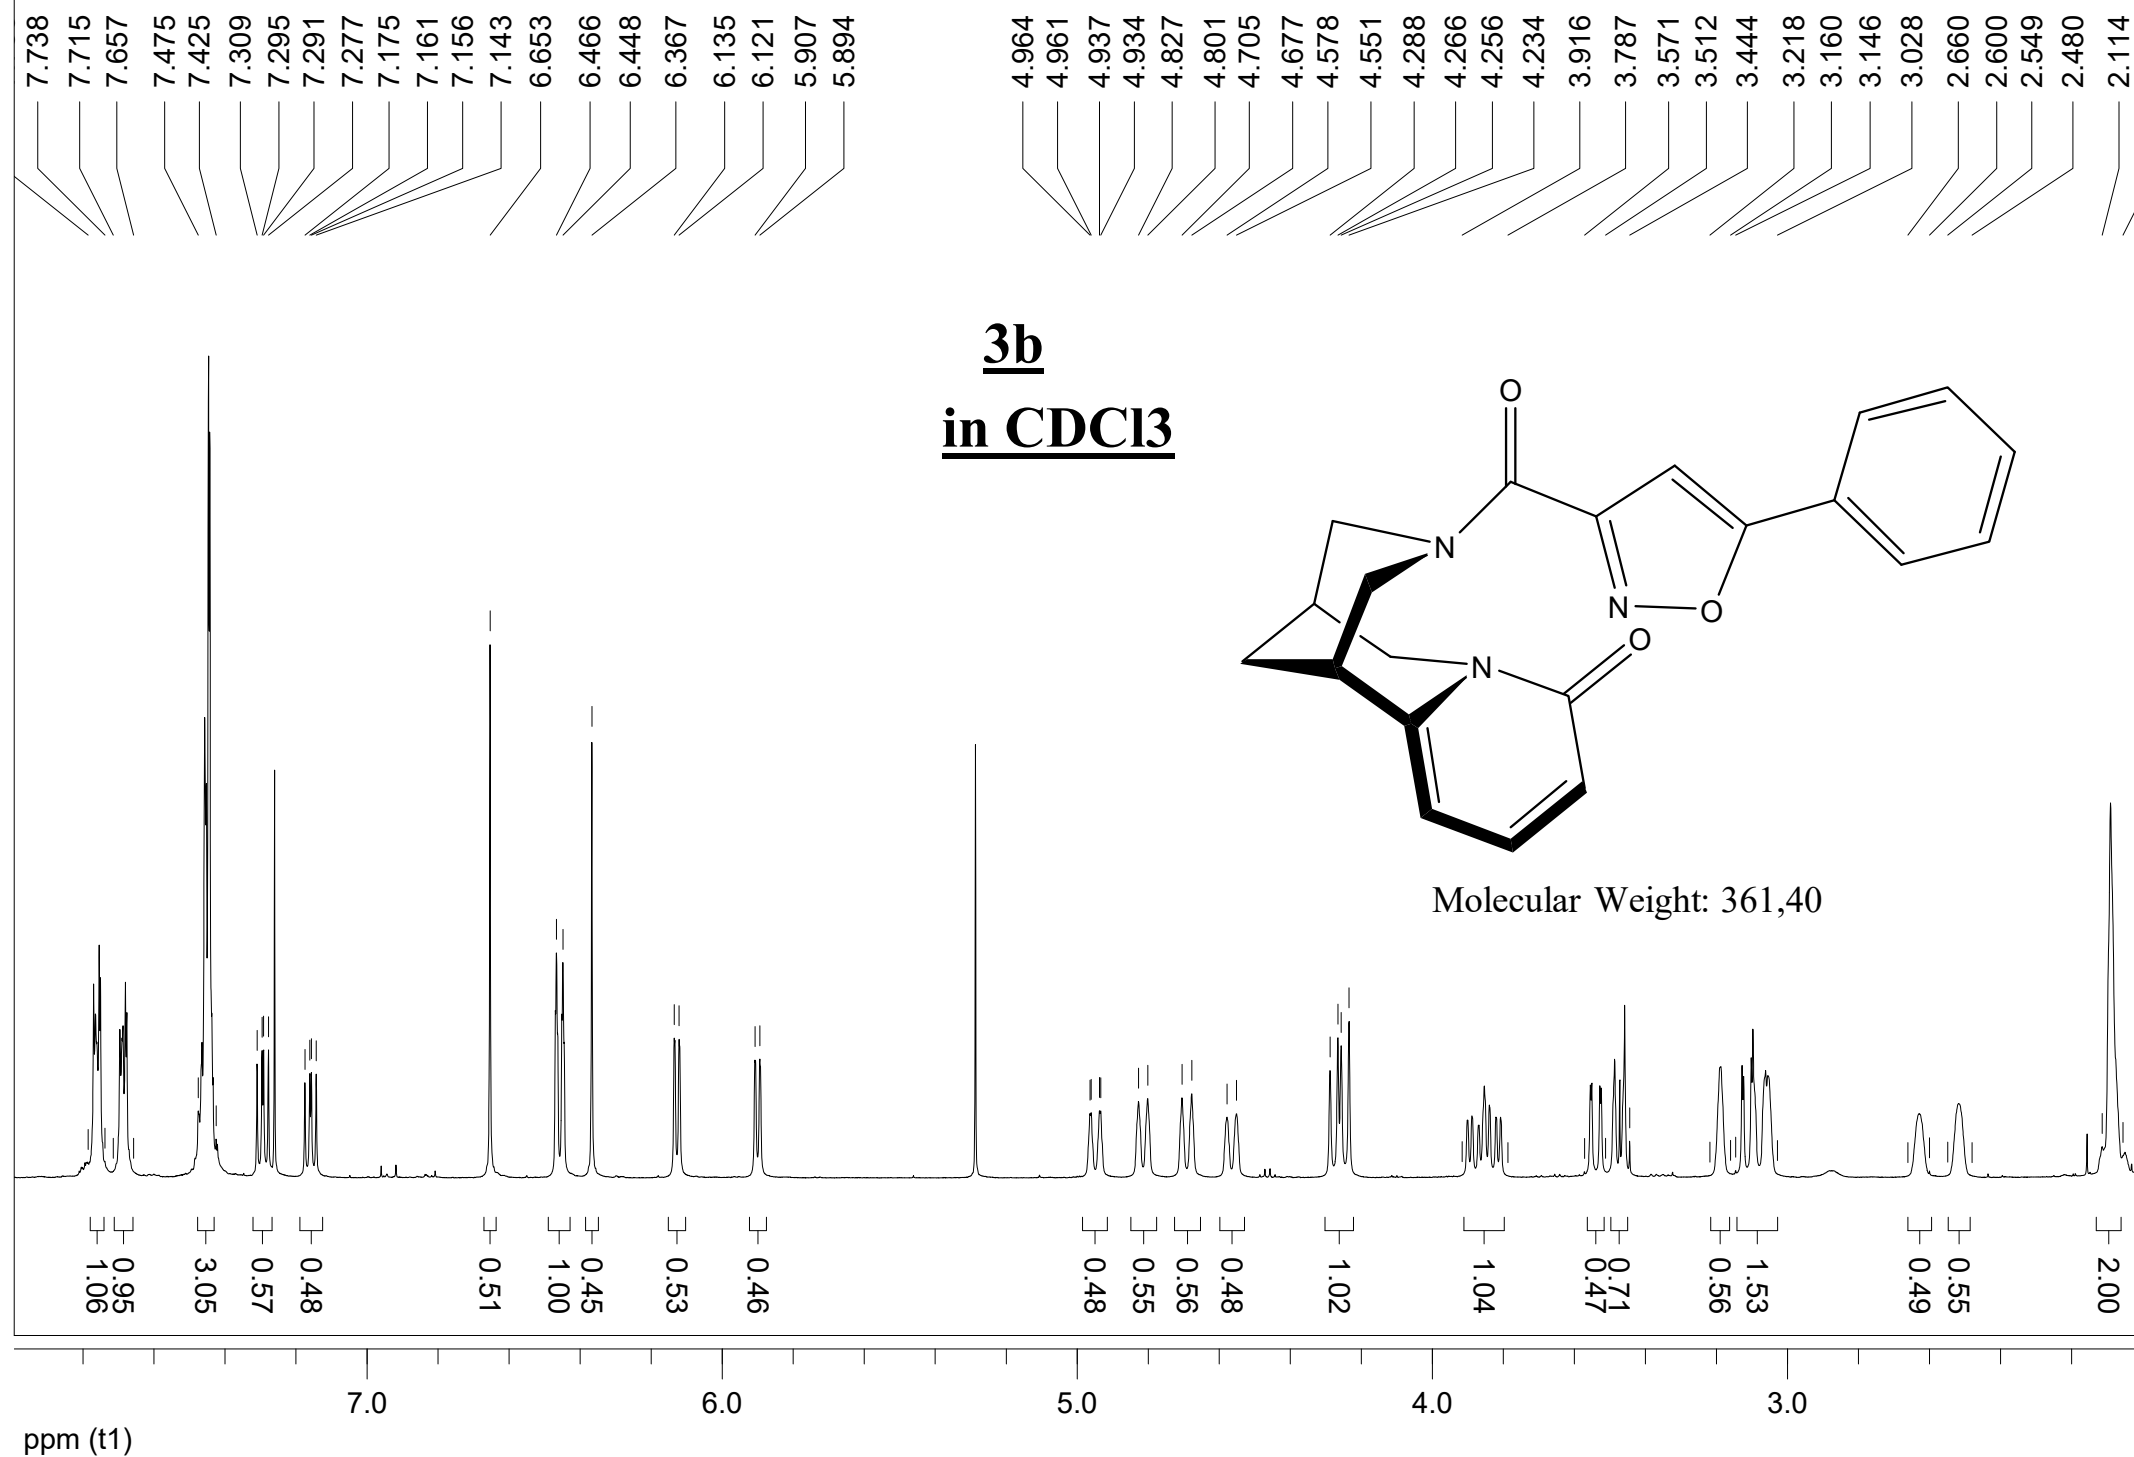

**3b**

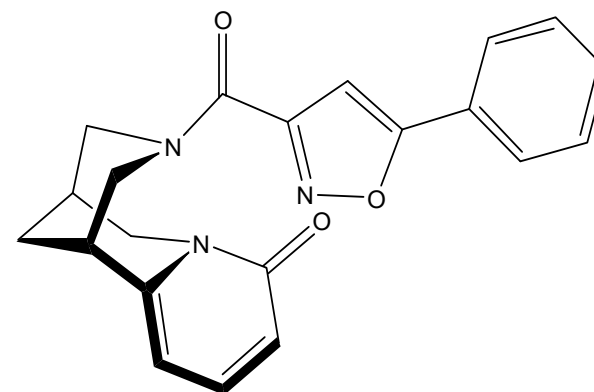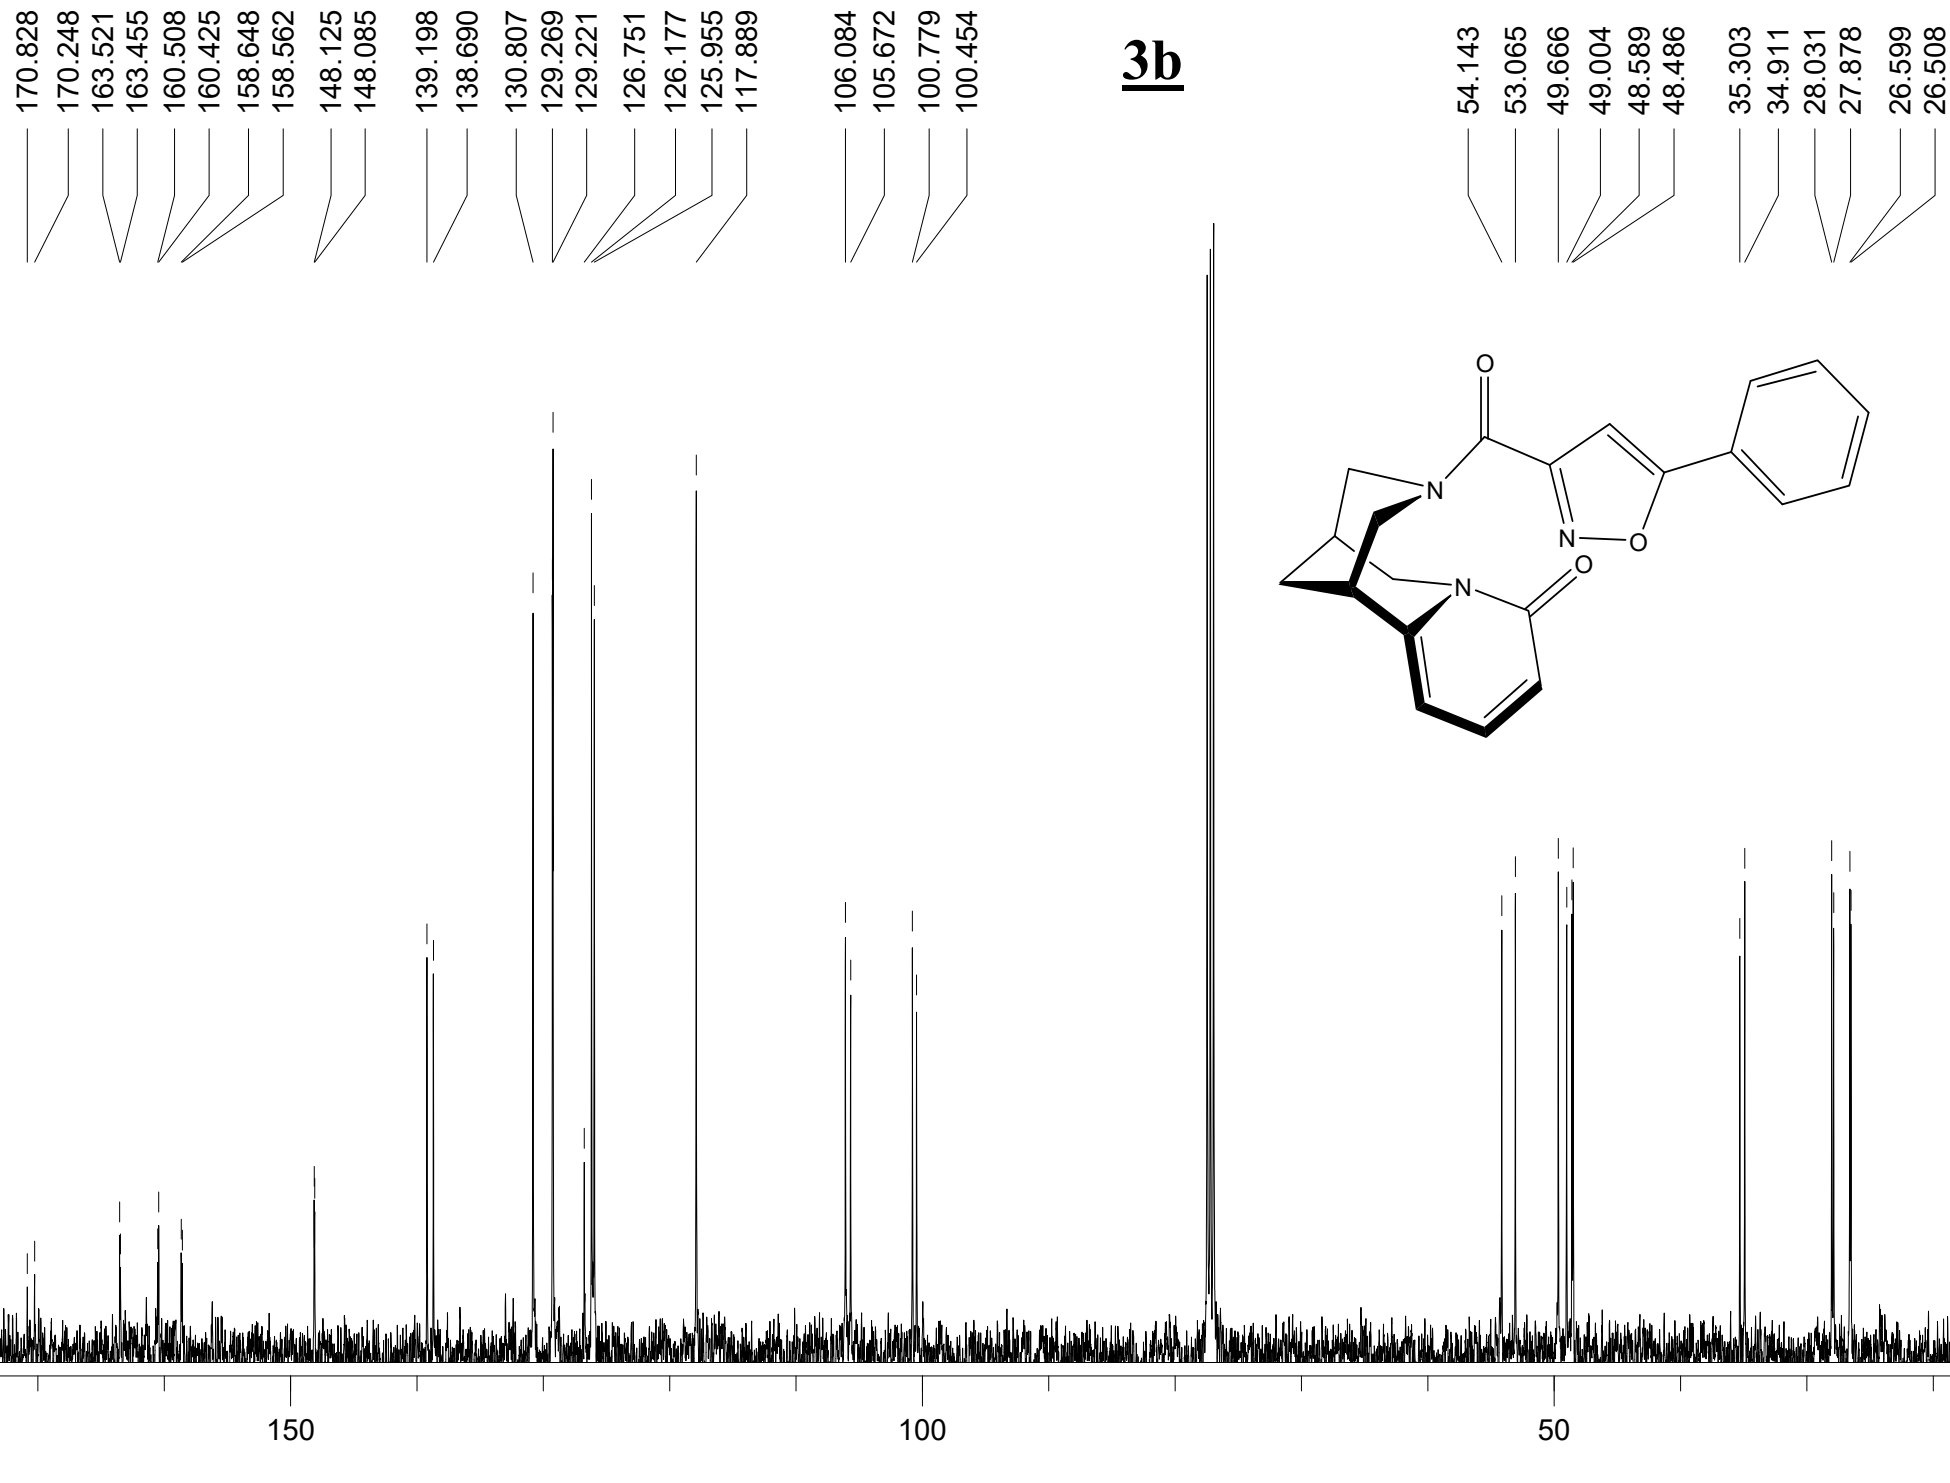

**3b**  
**DEPT**

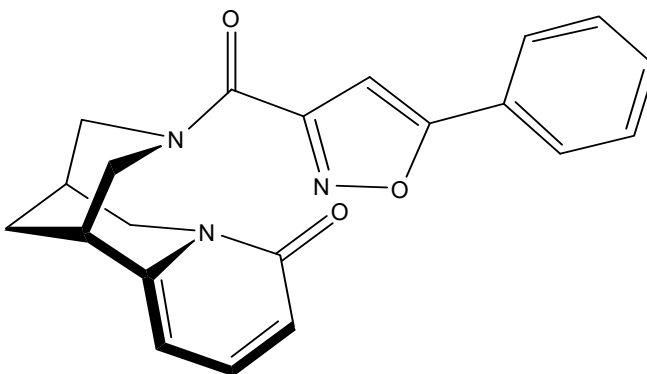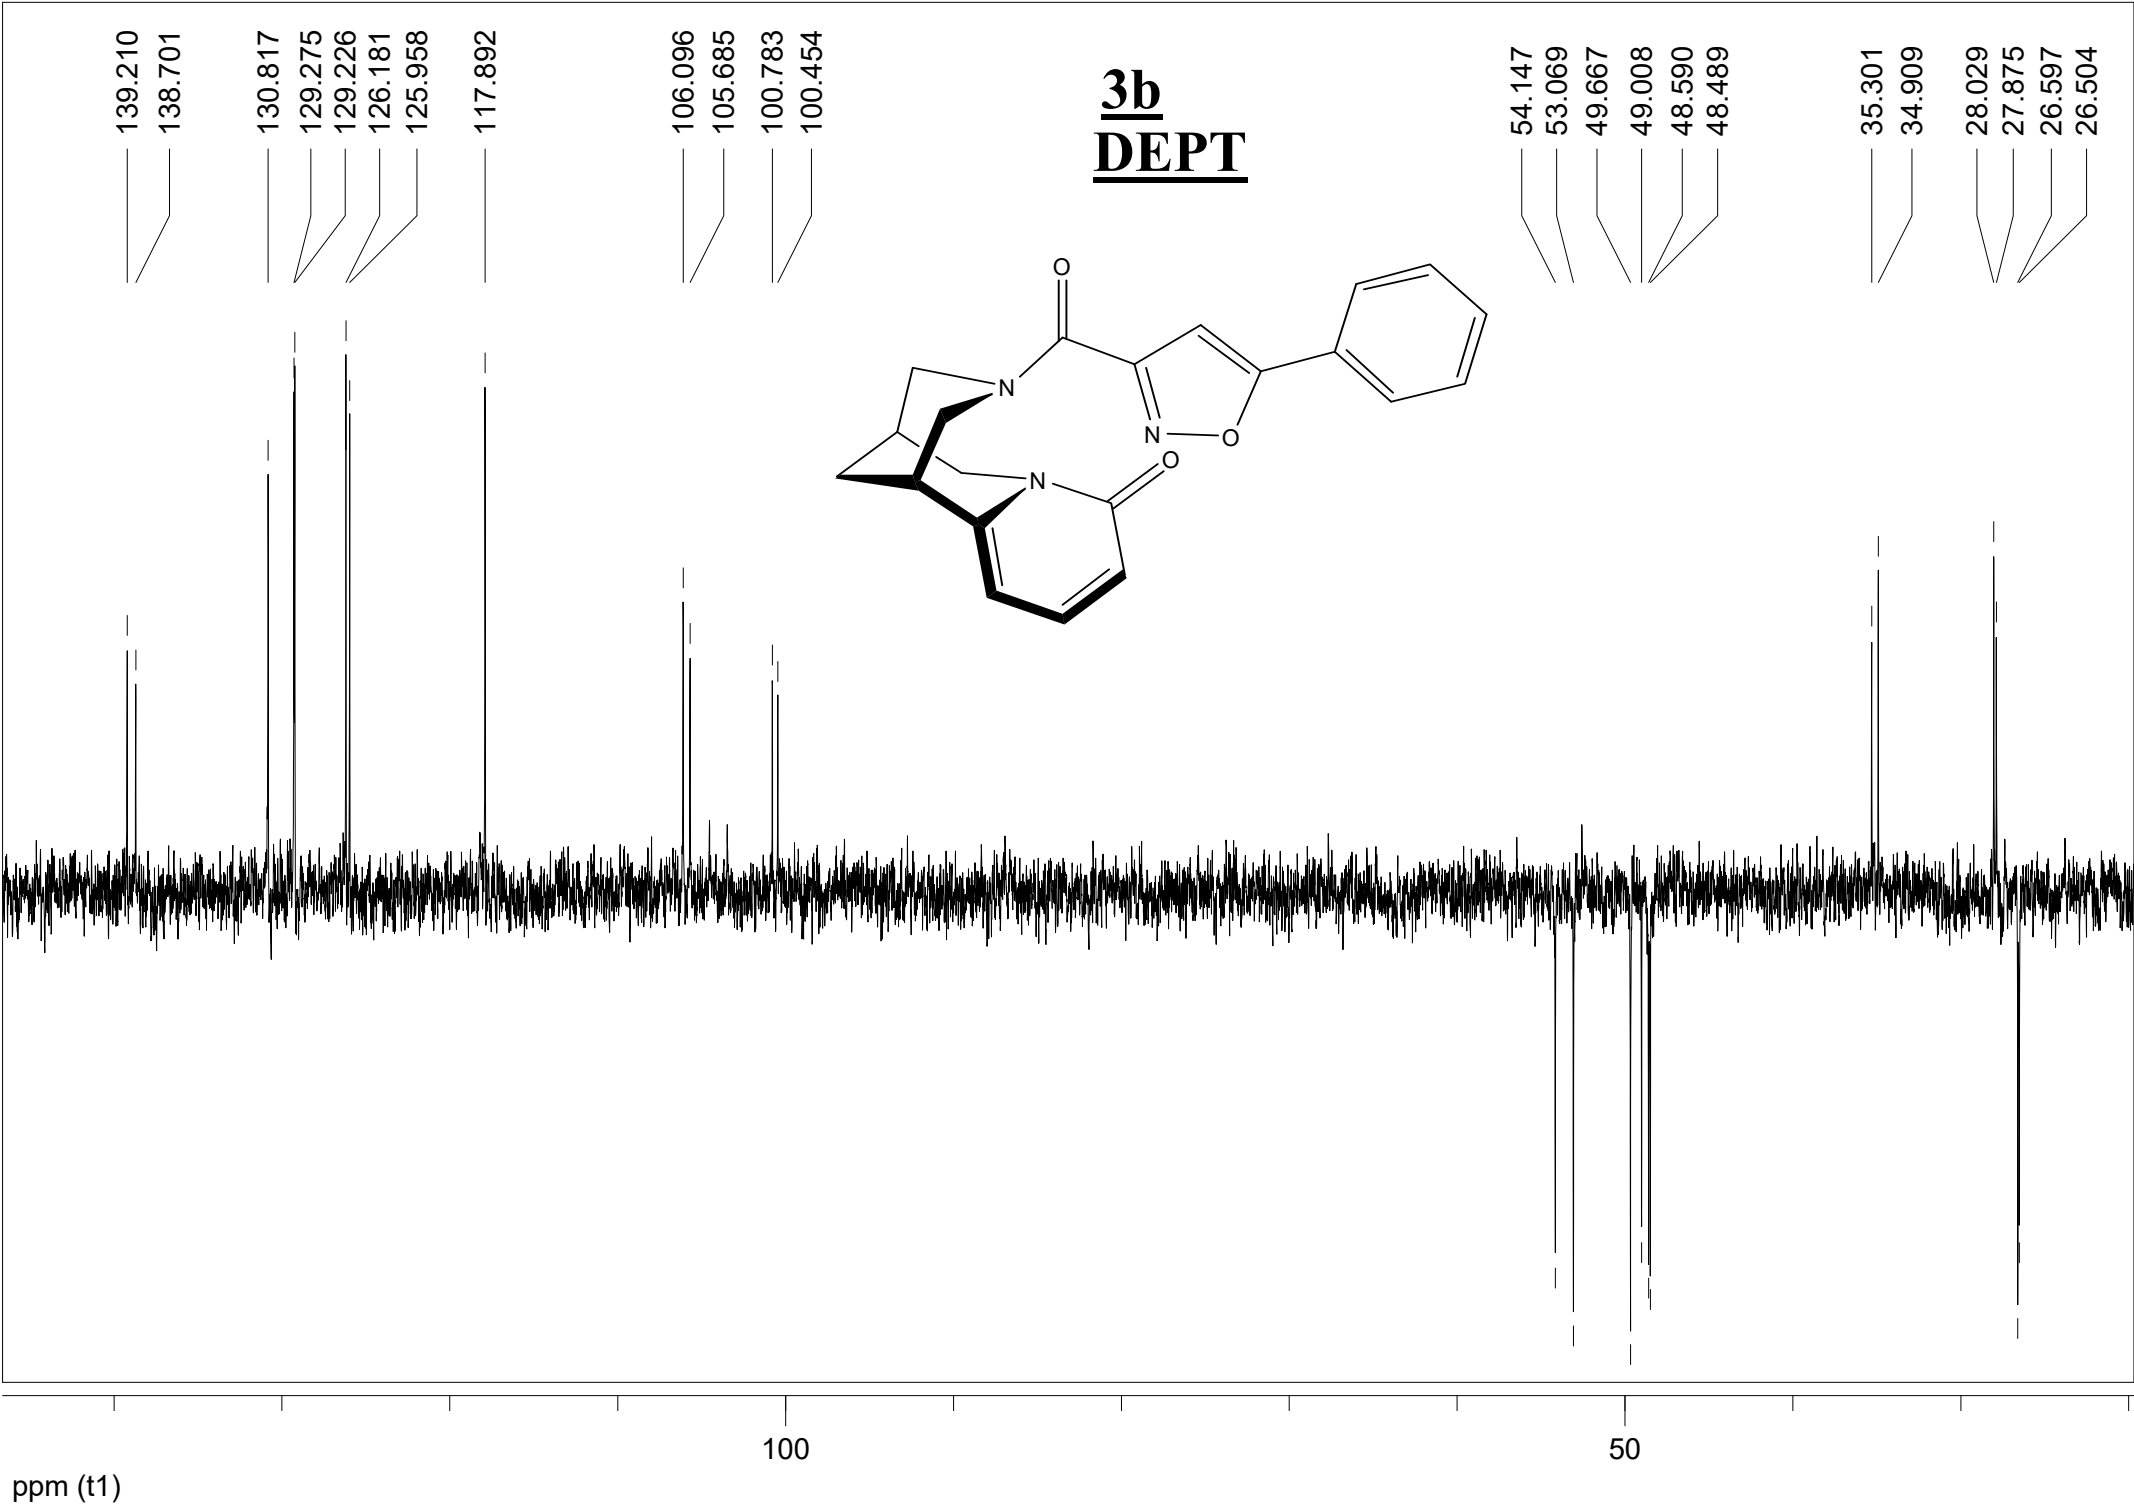

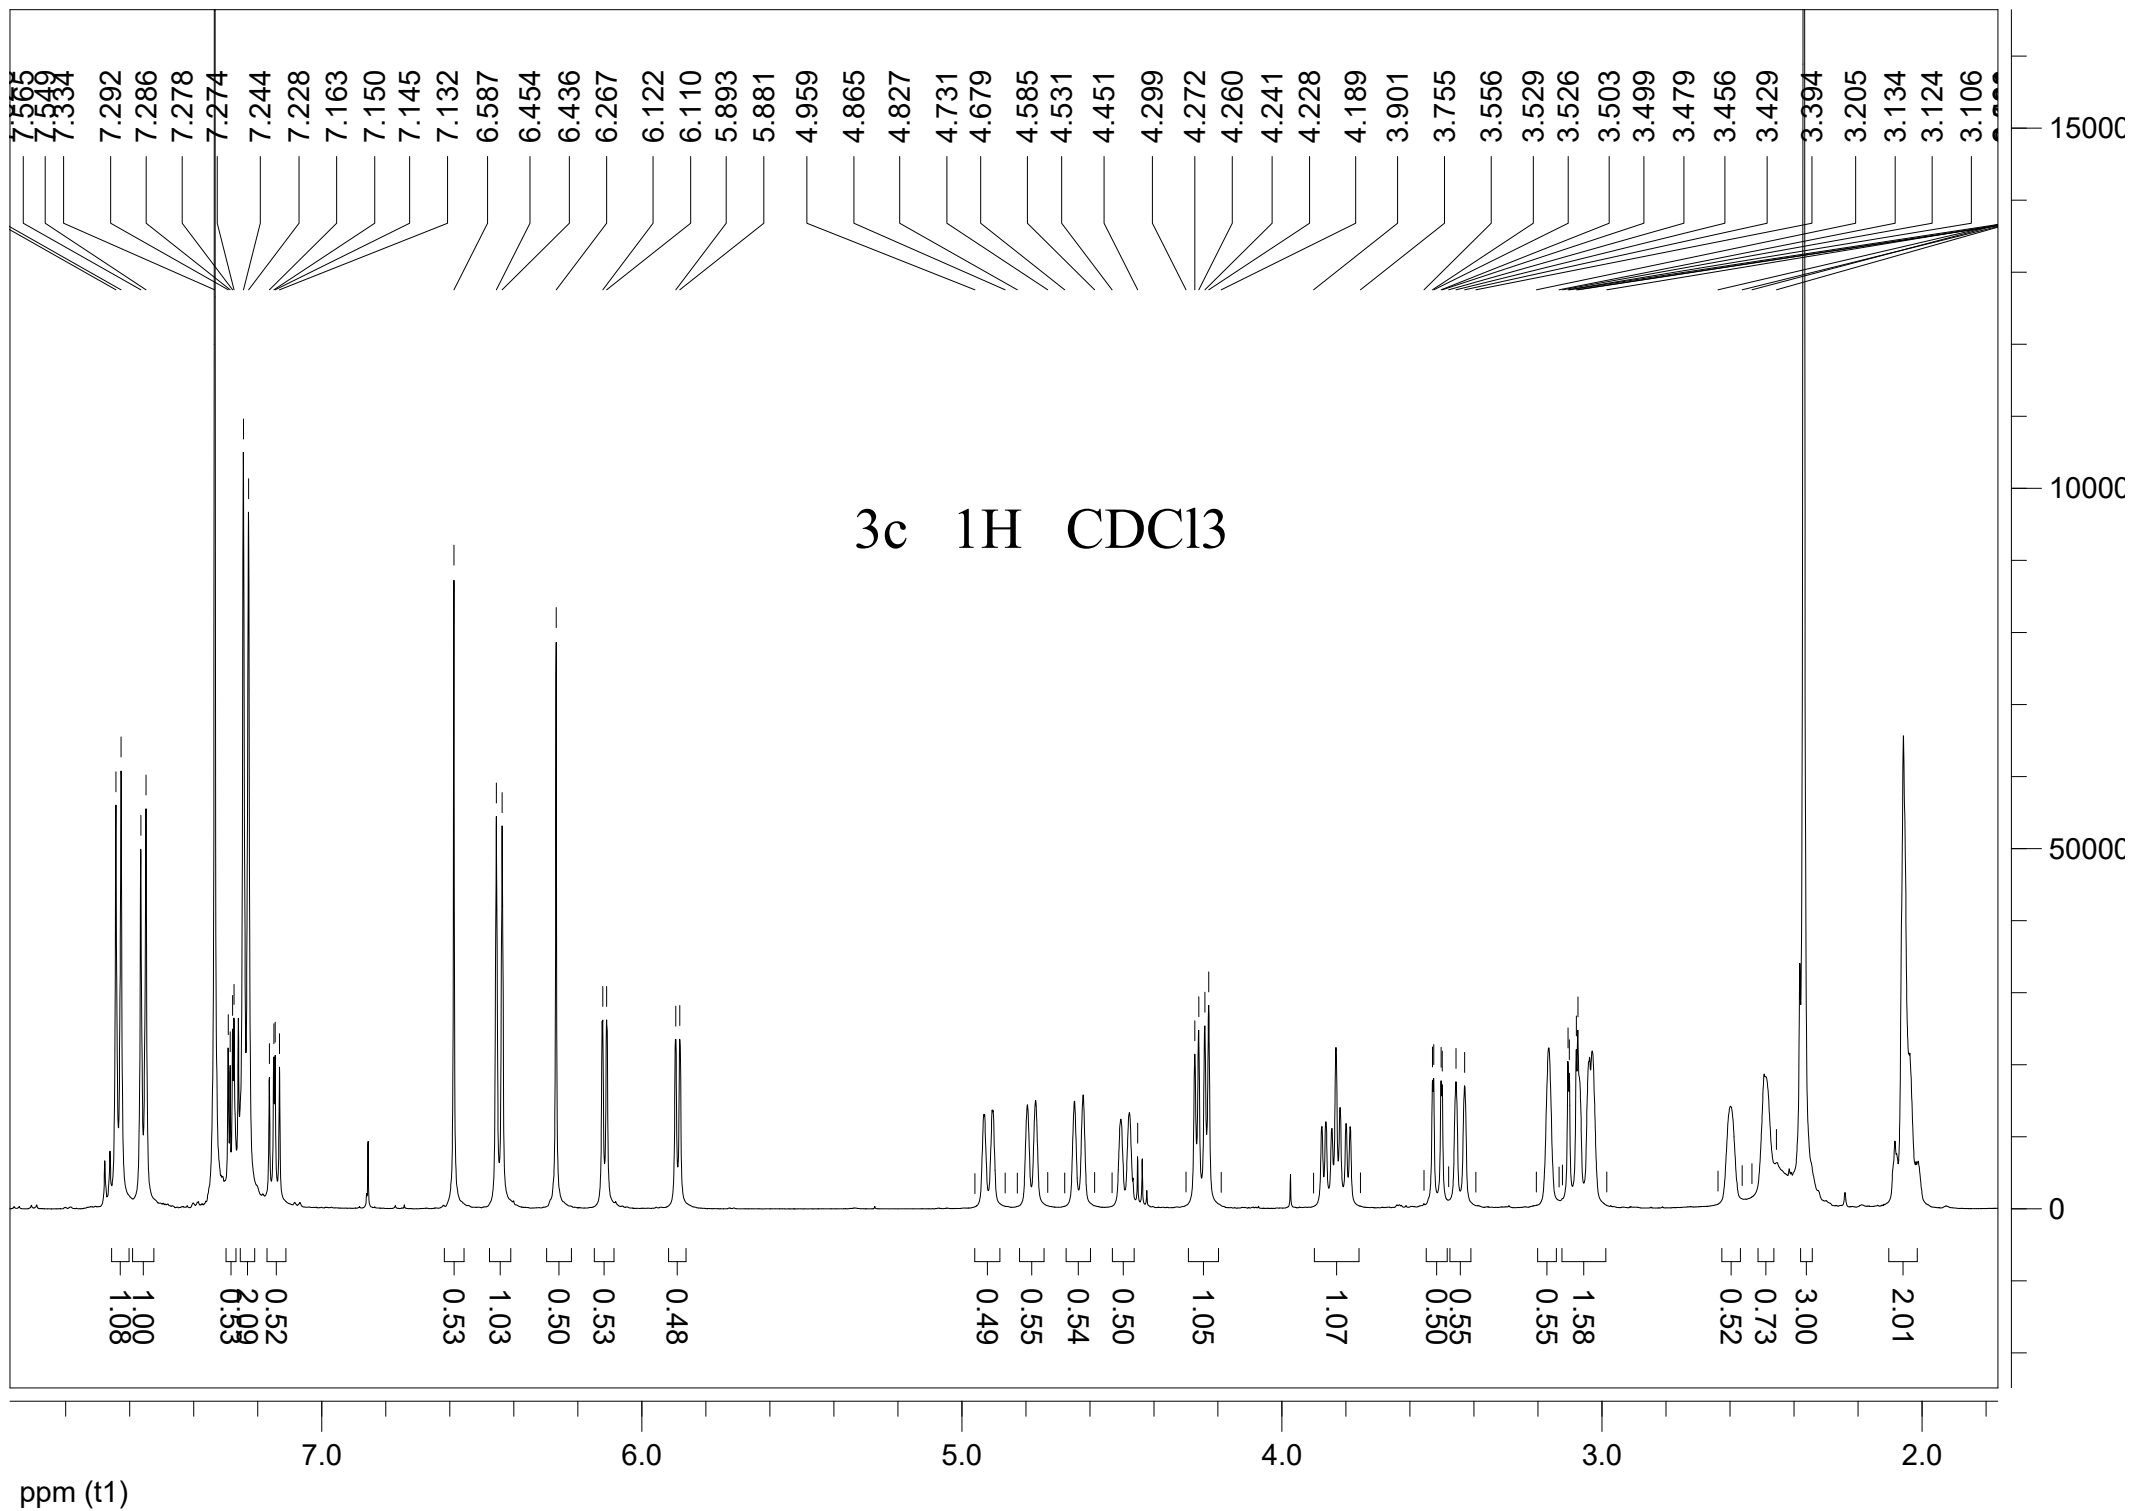



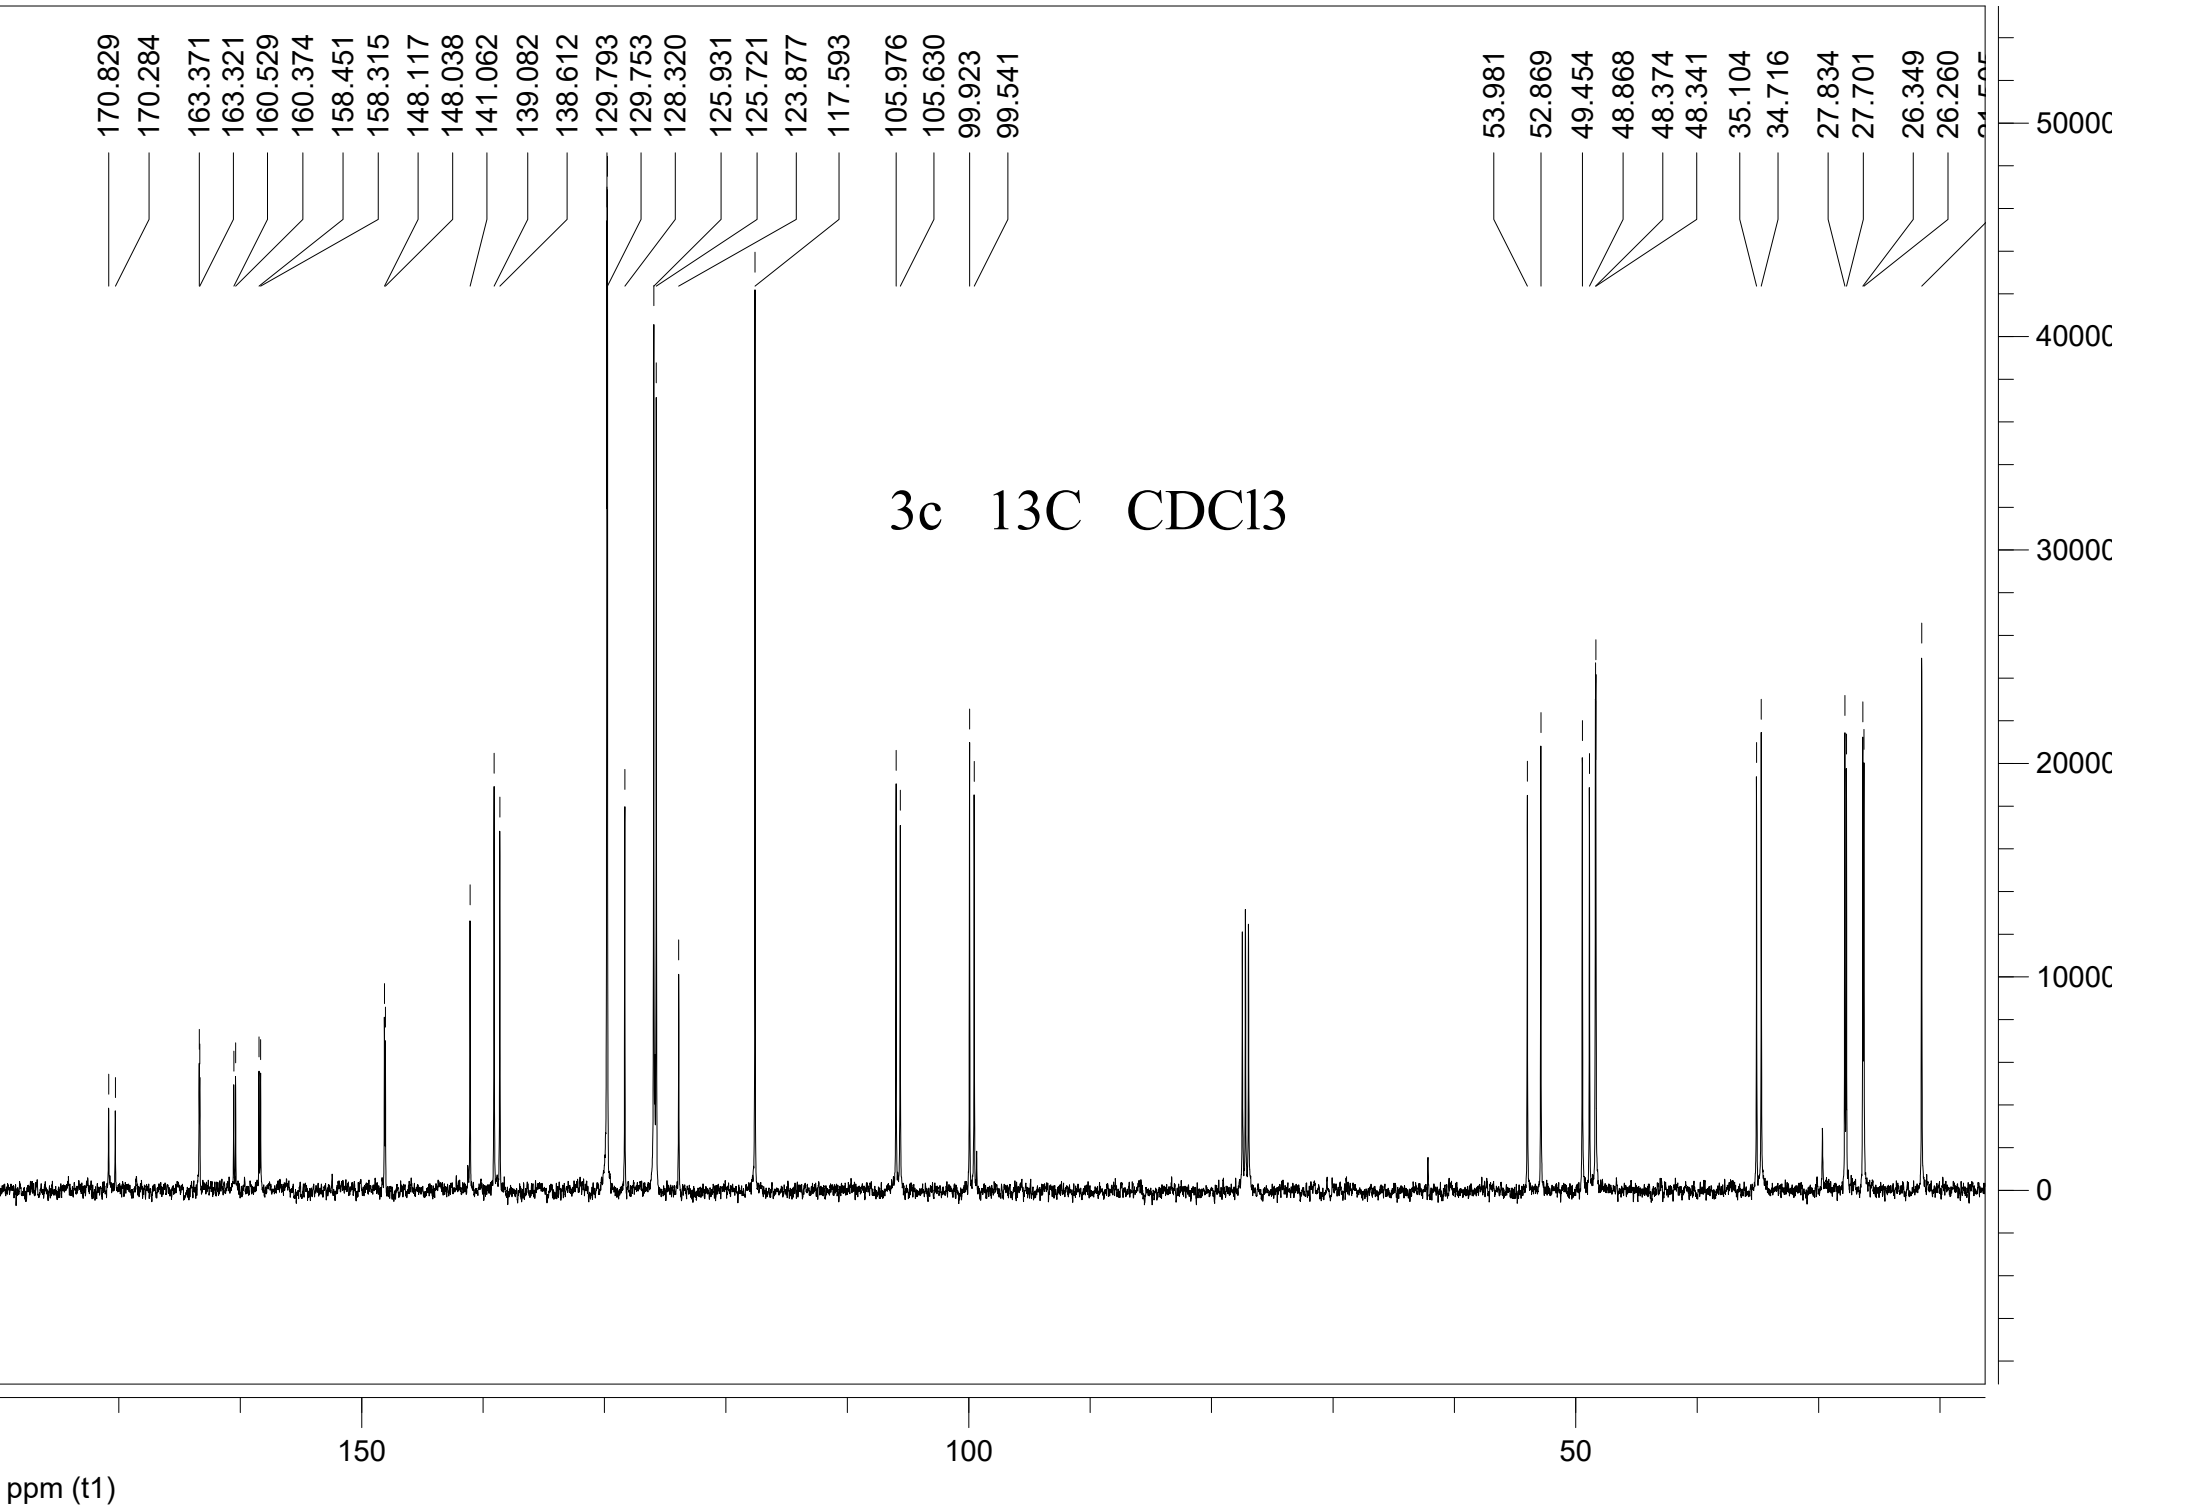

3c DEPT

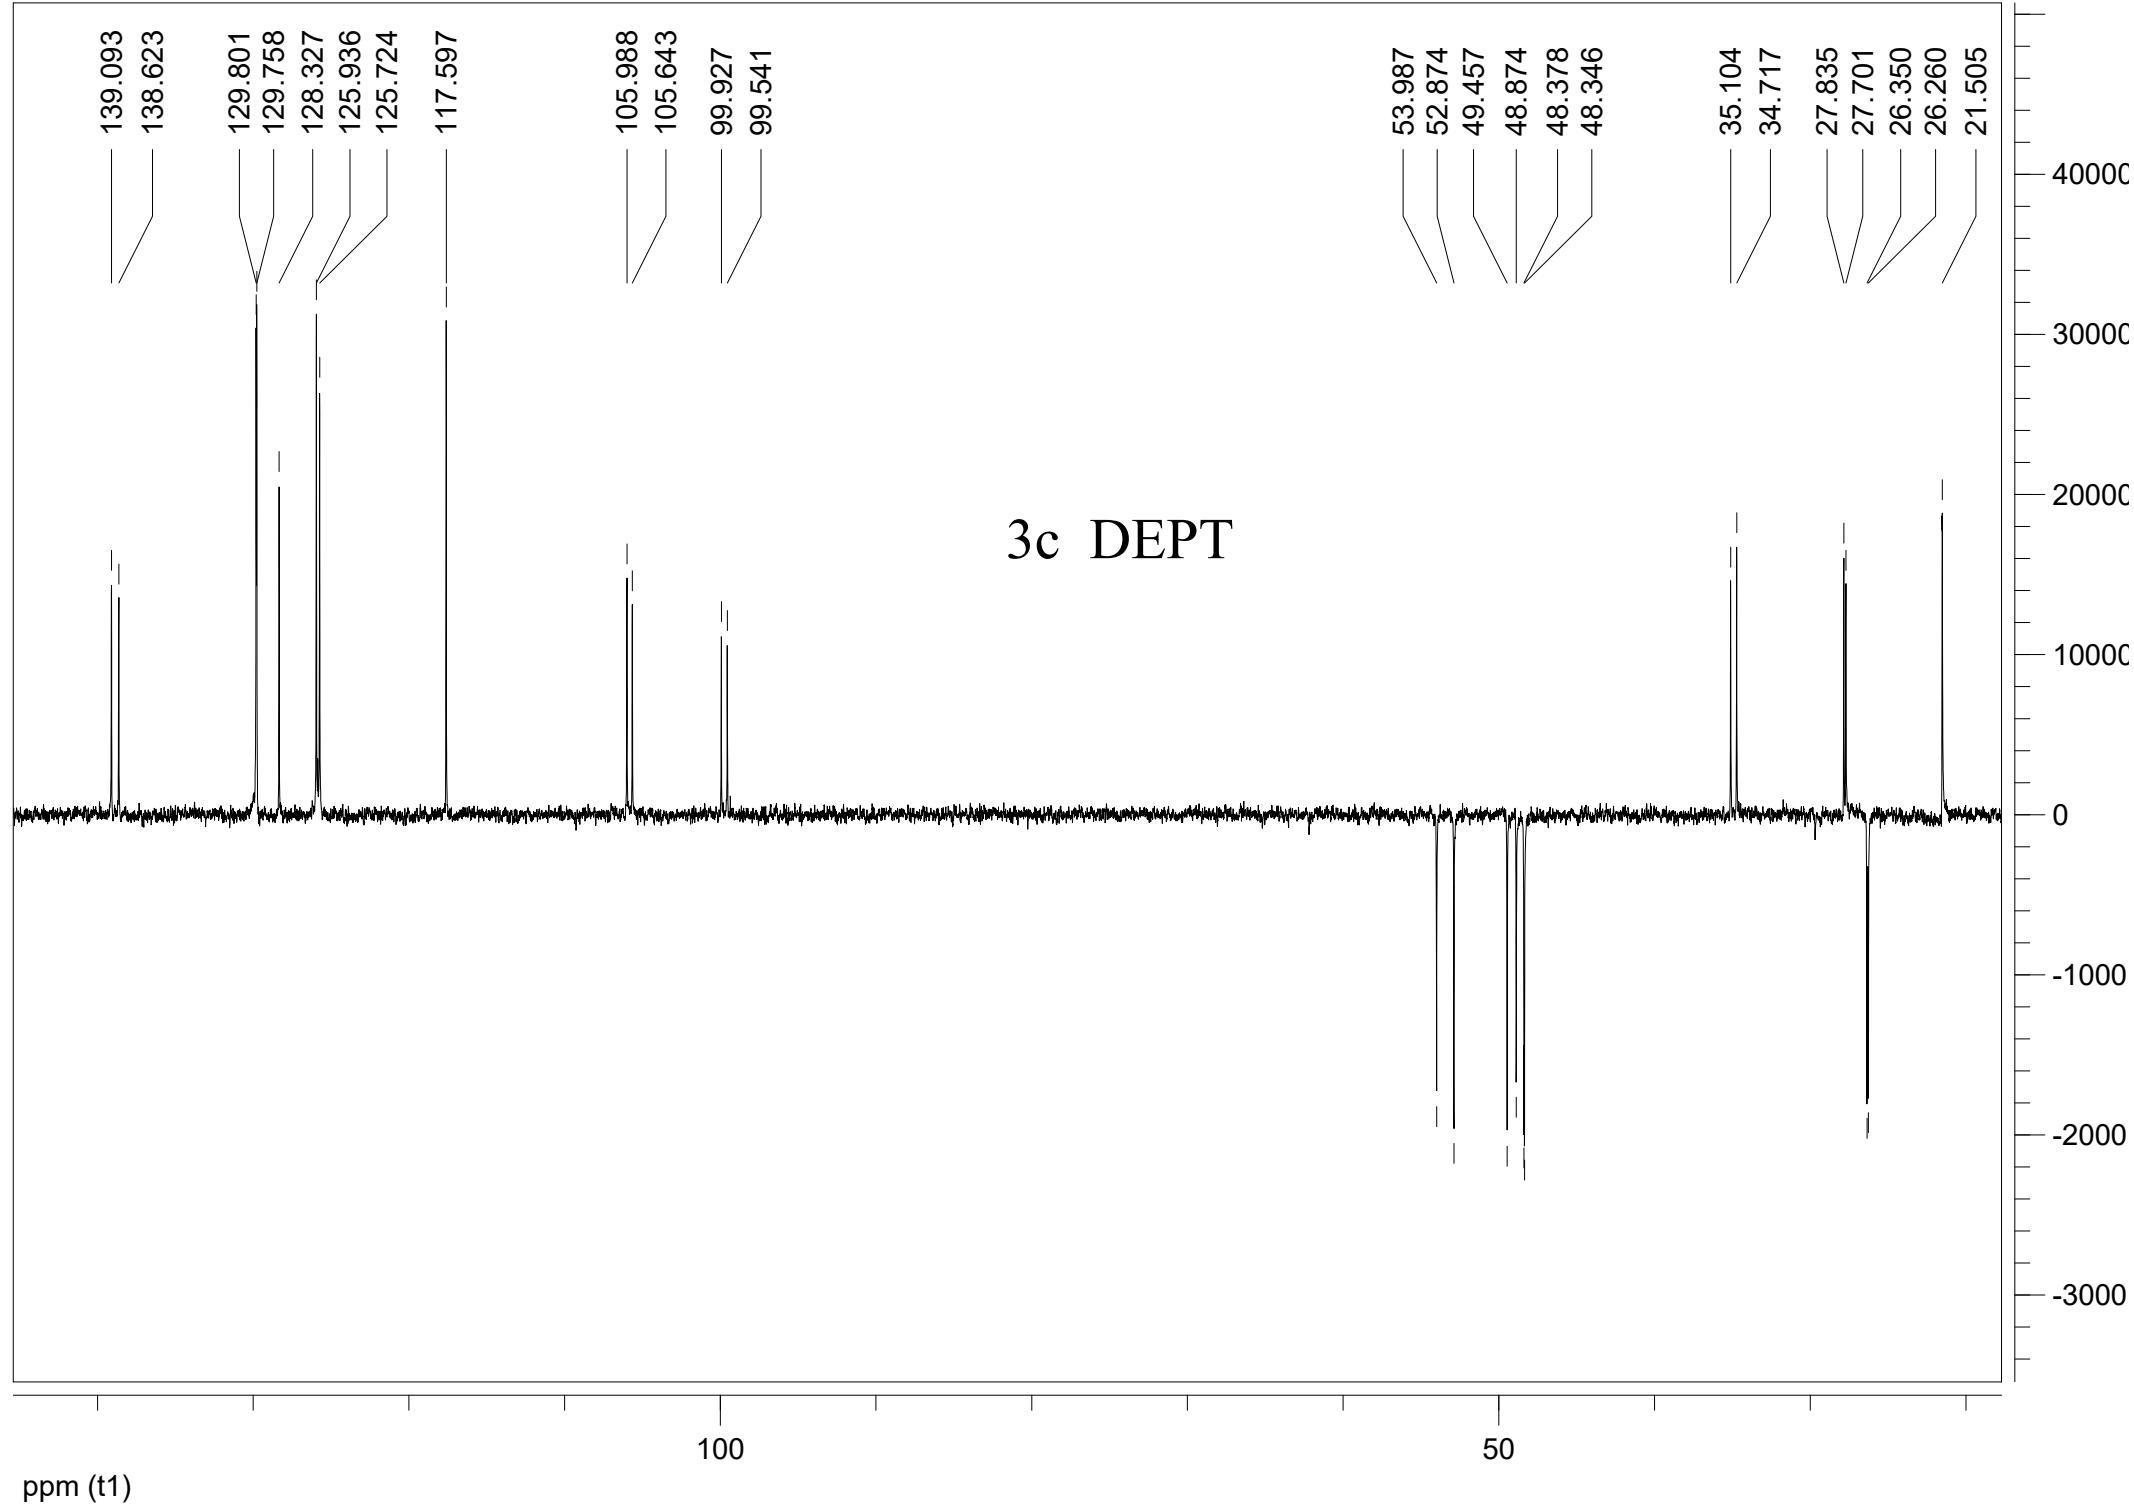

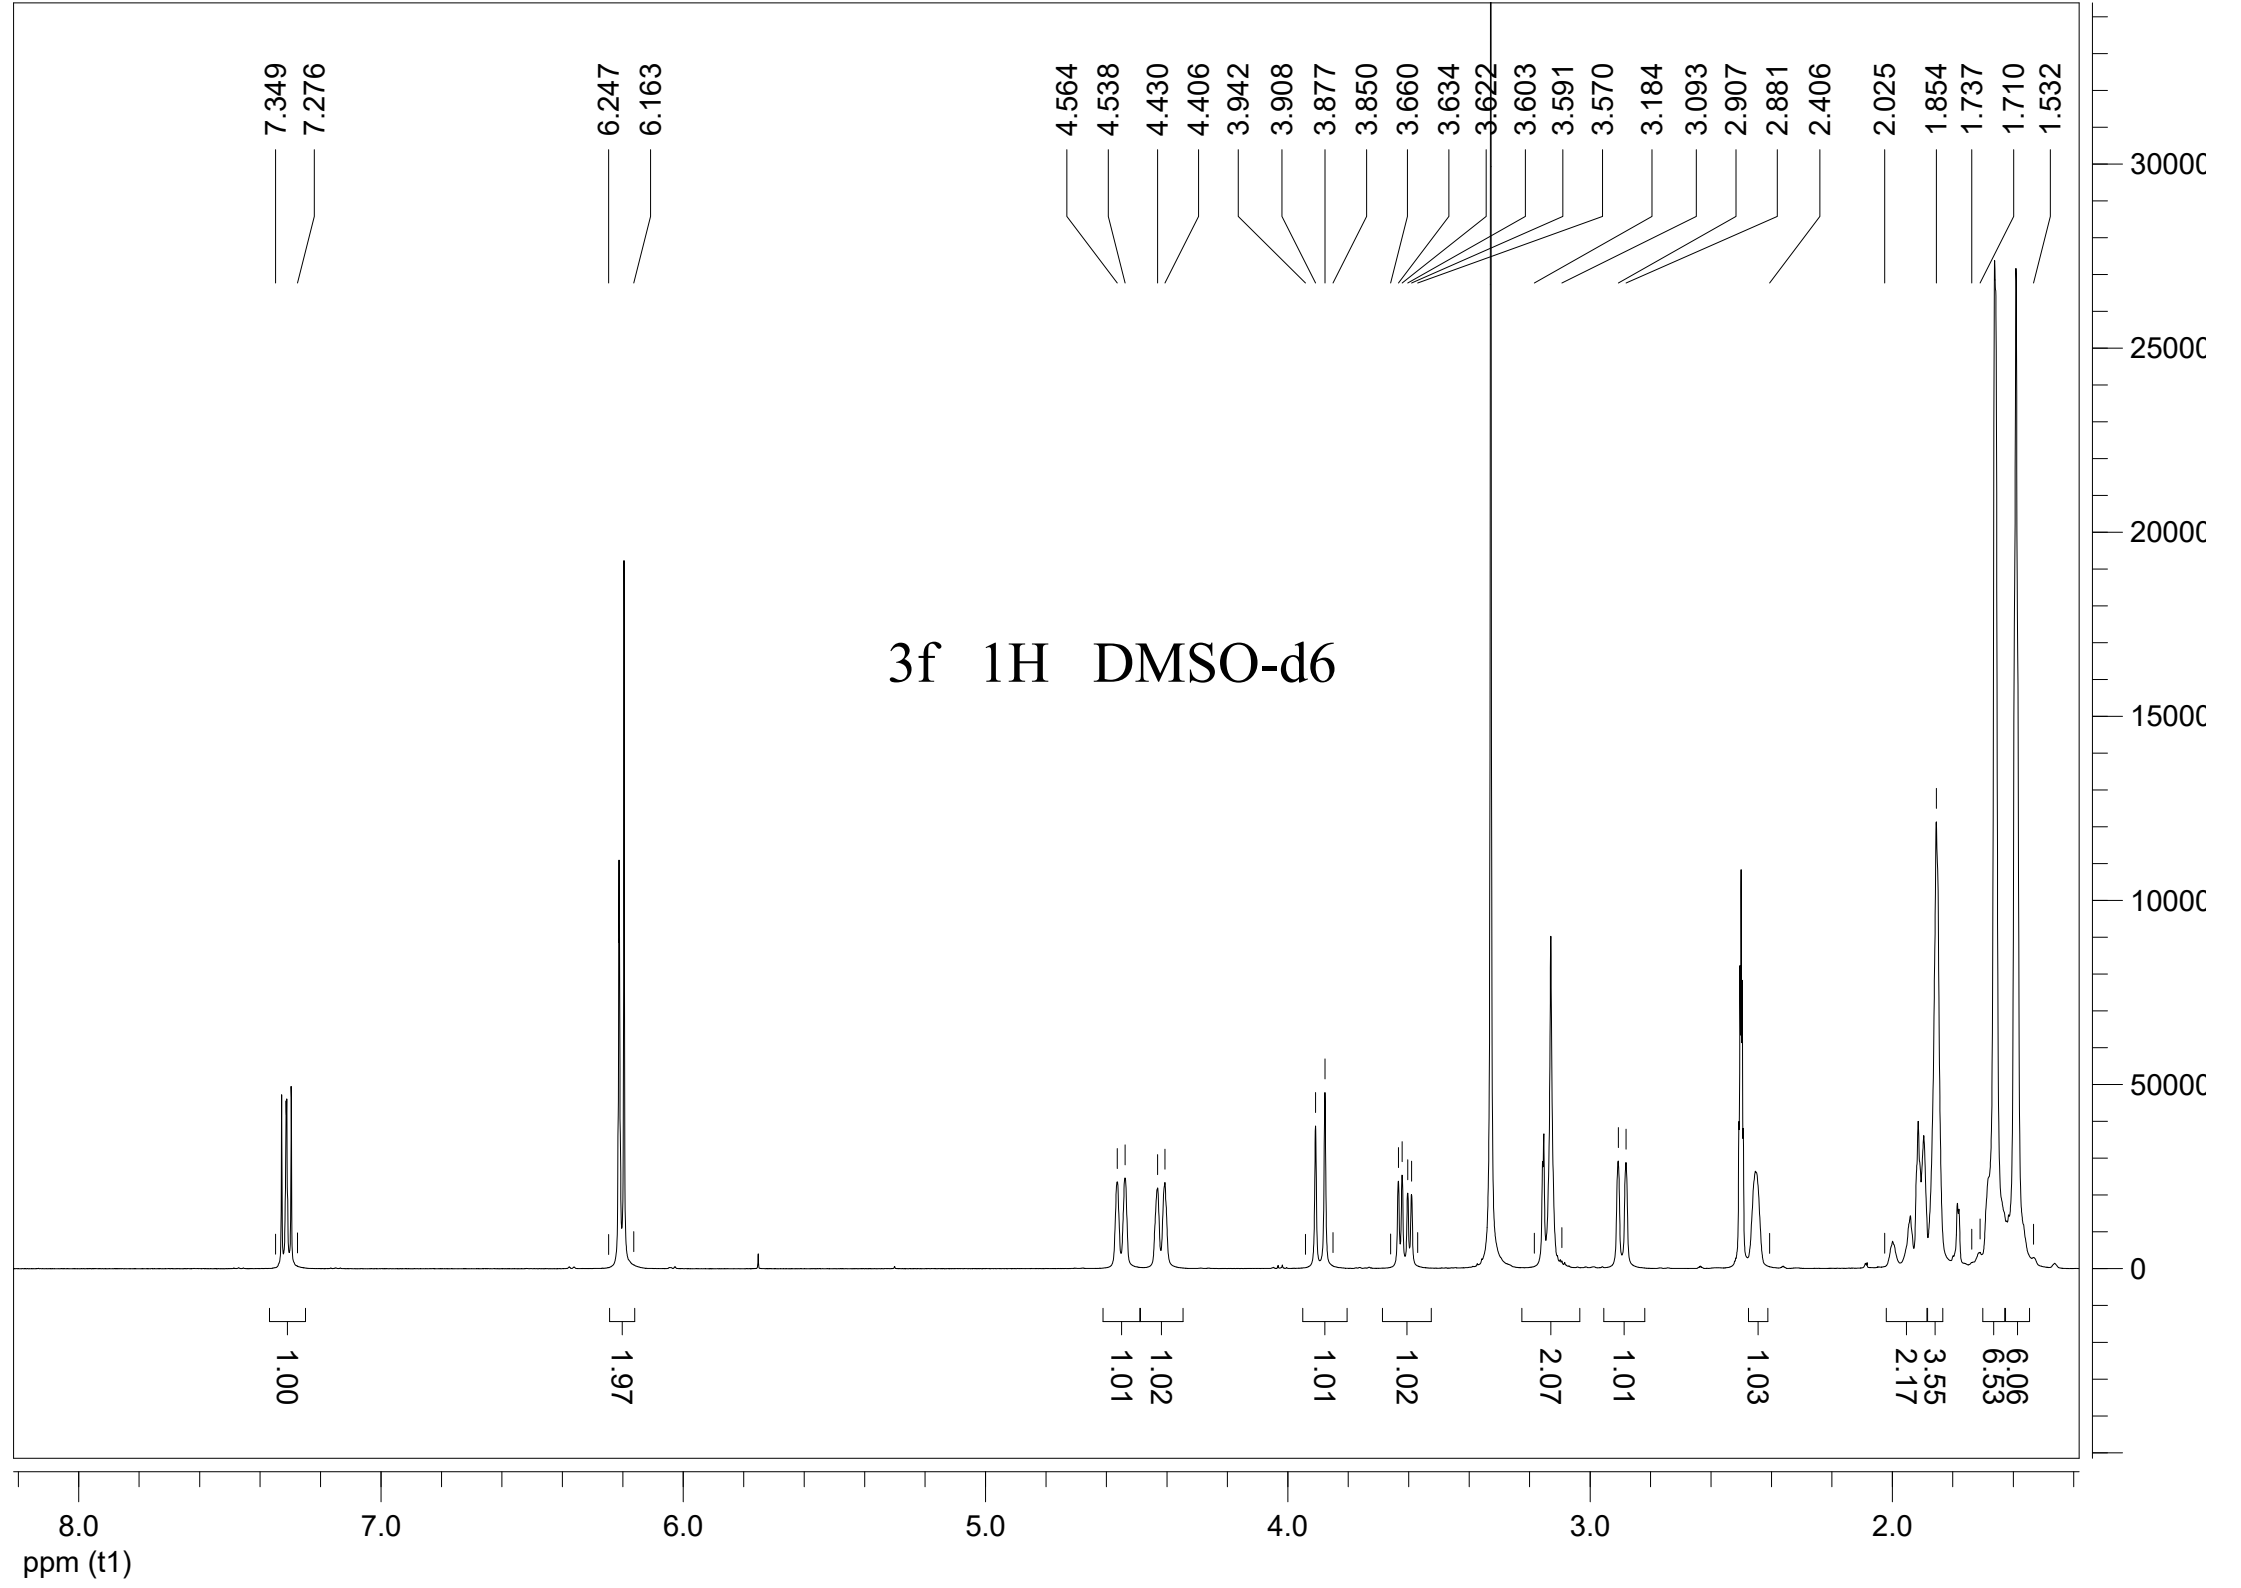

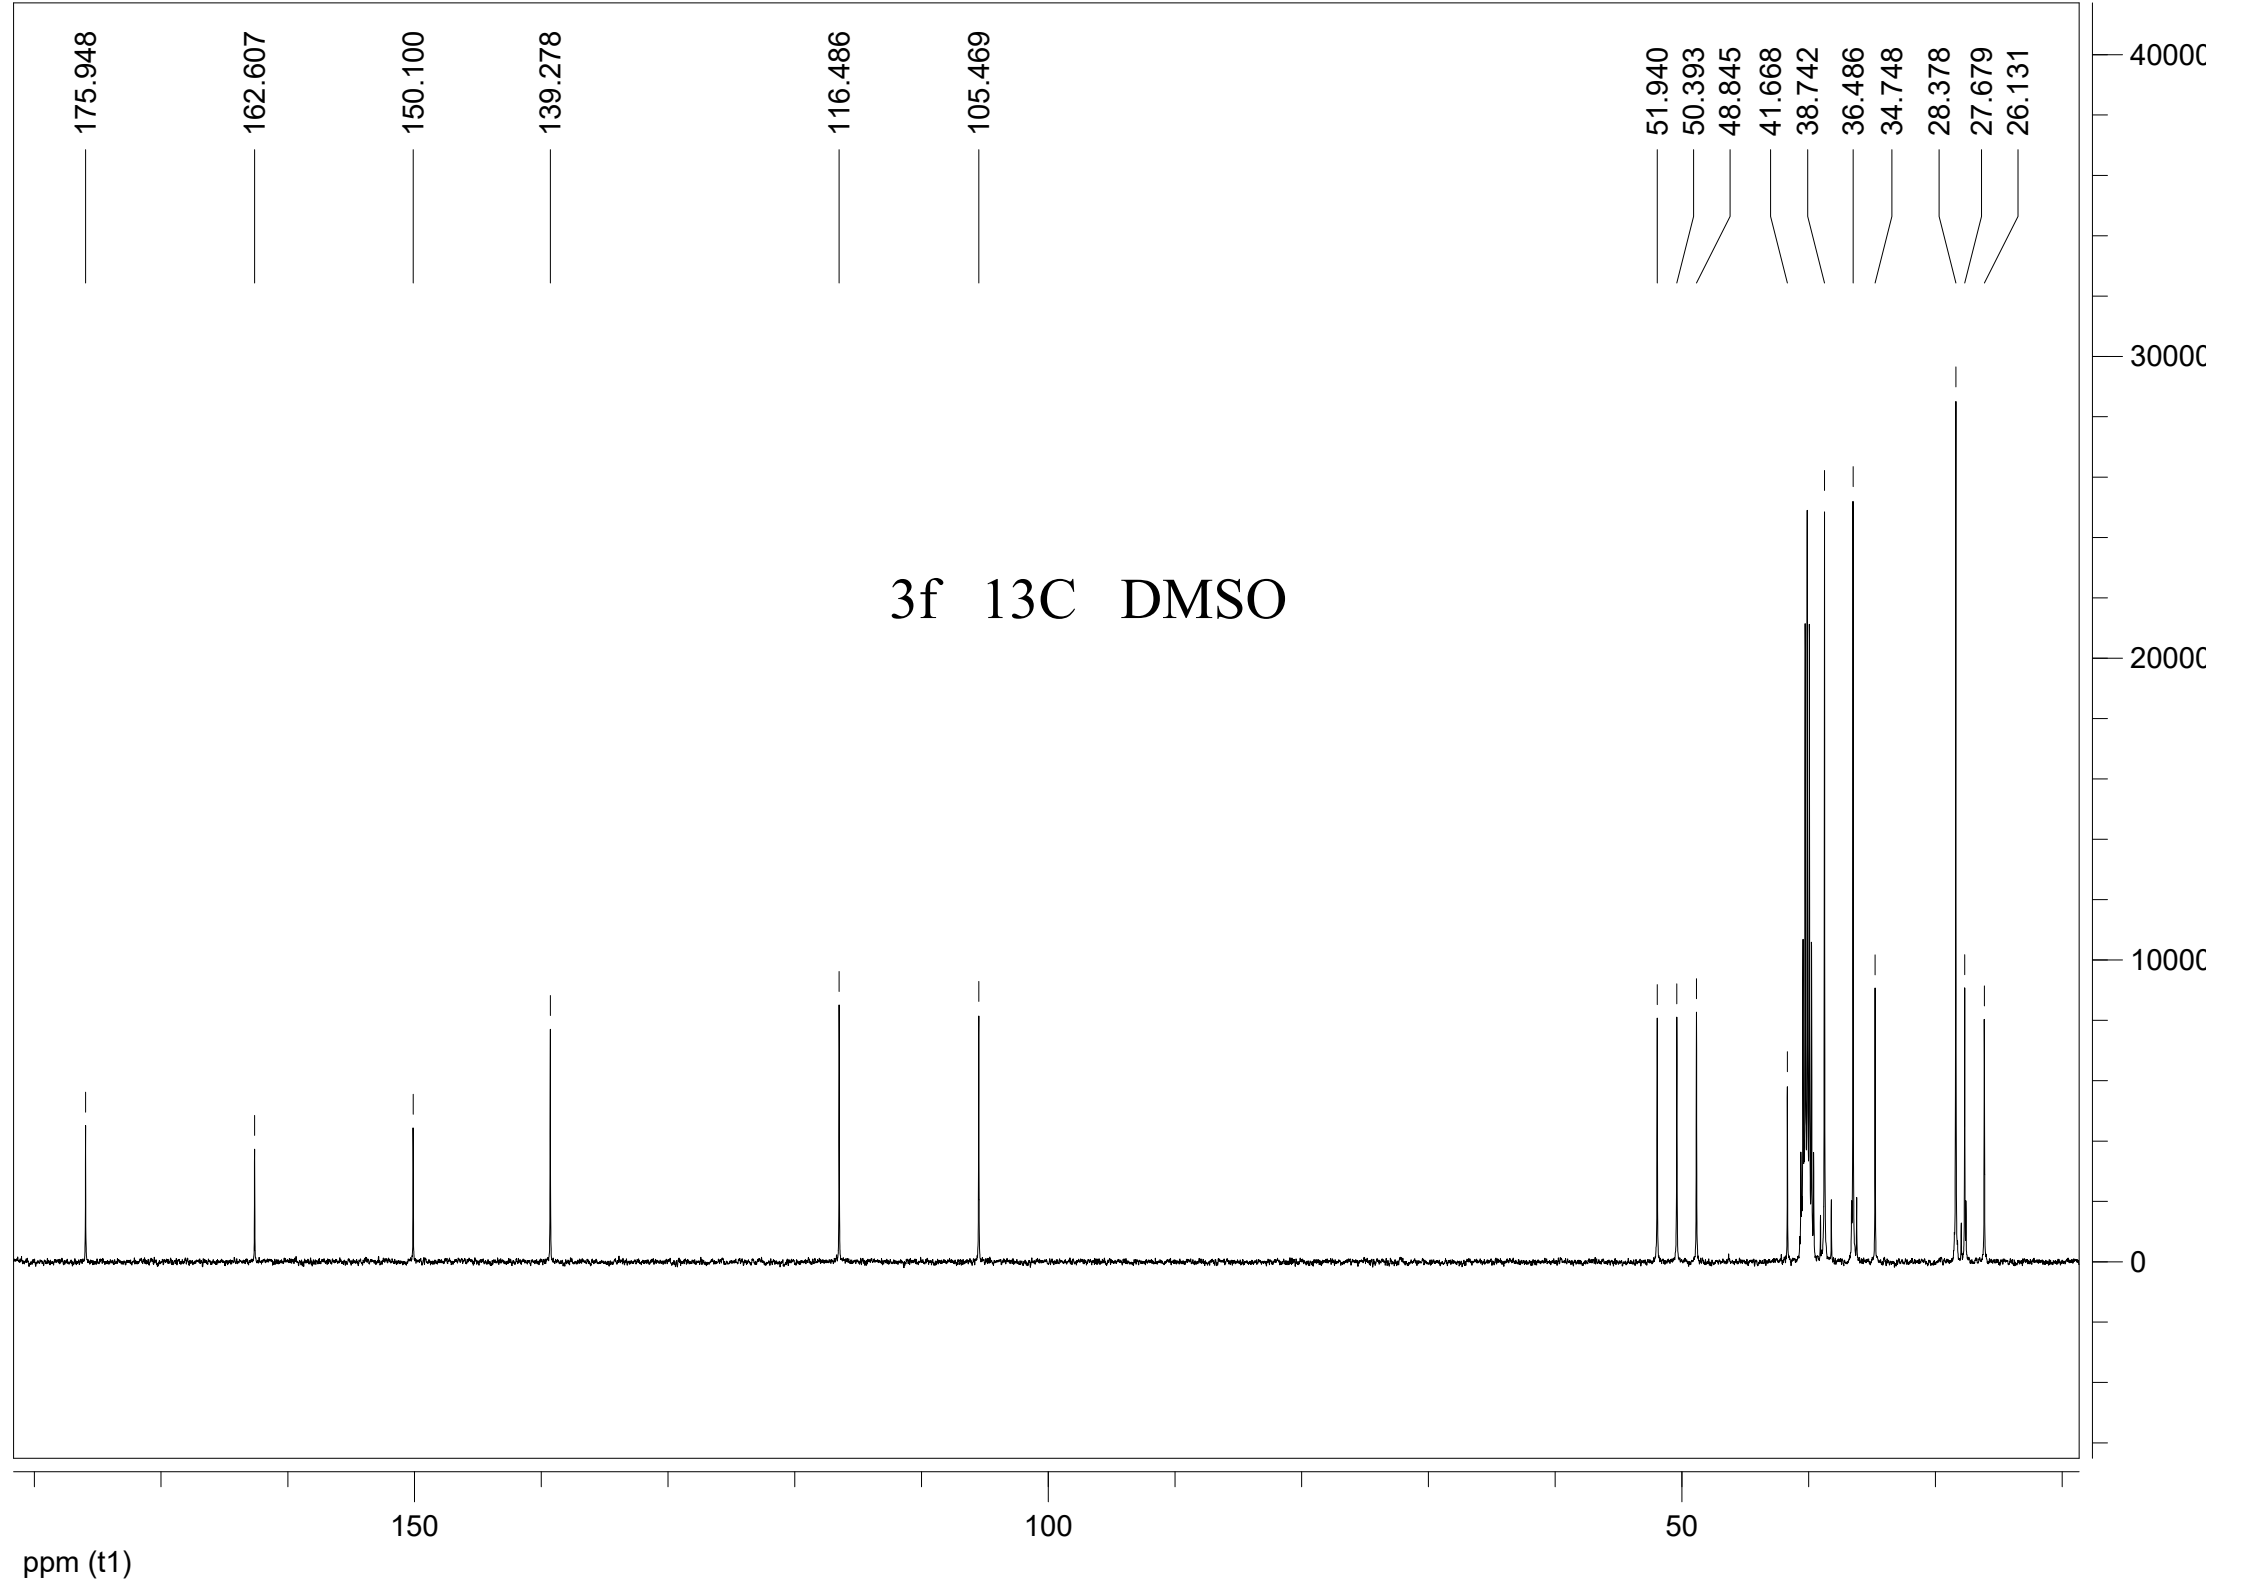

# 3f DEPT

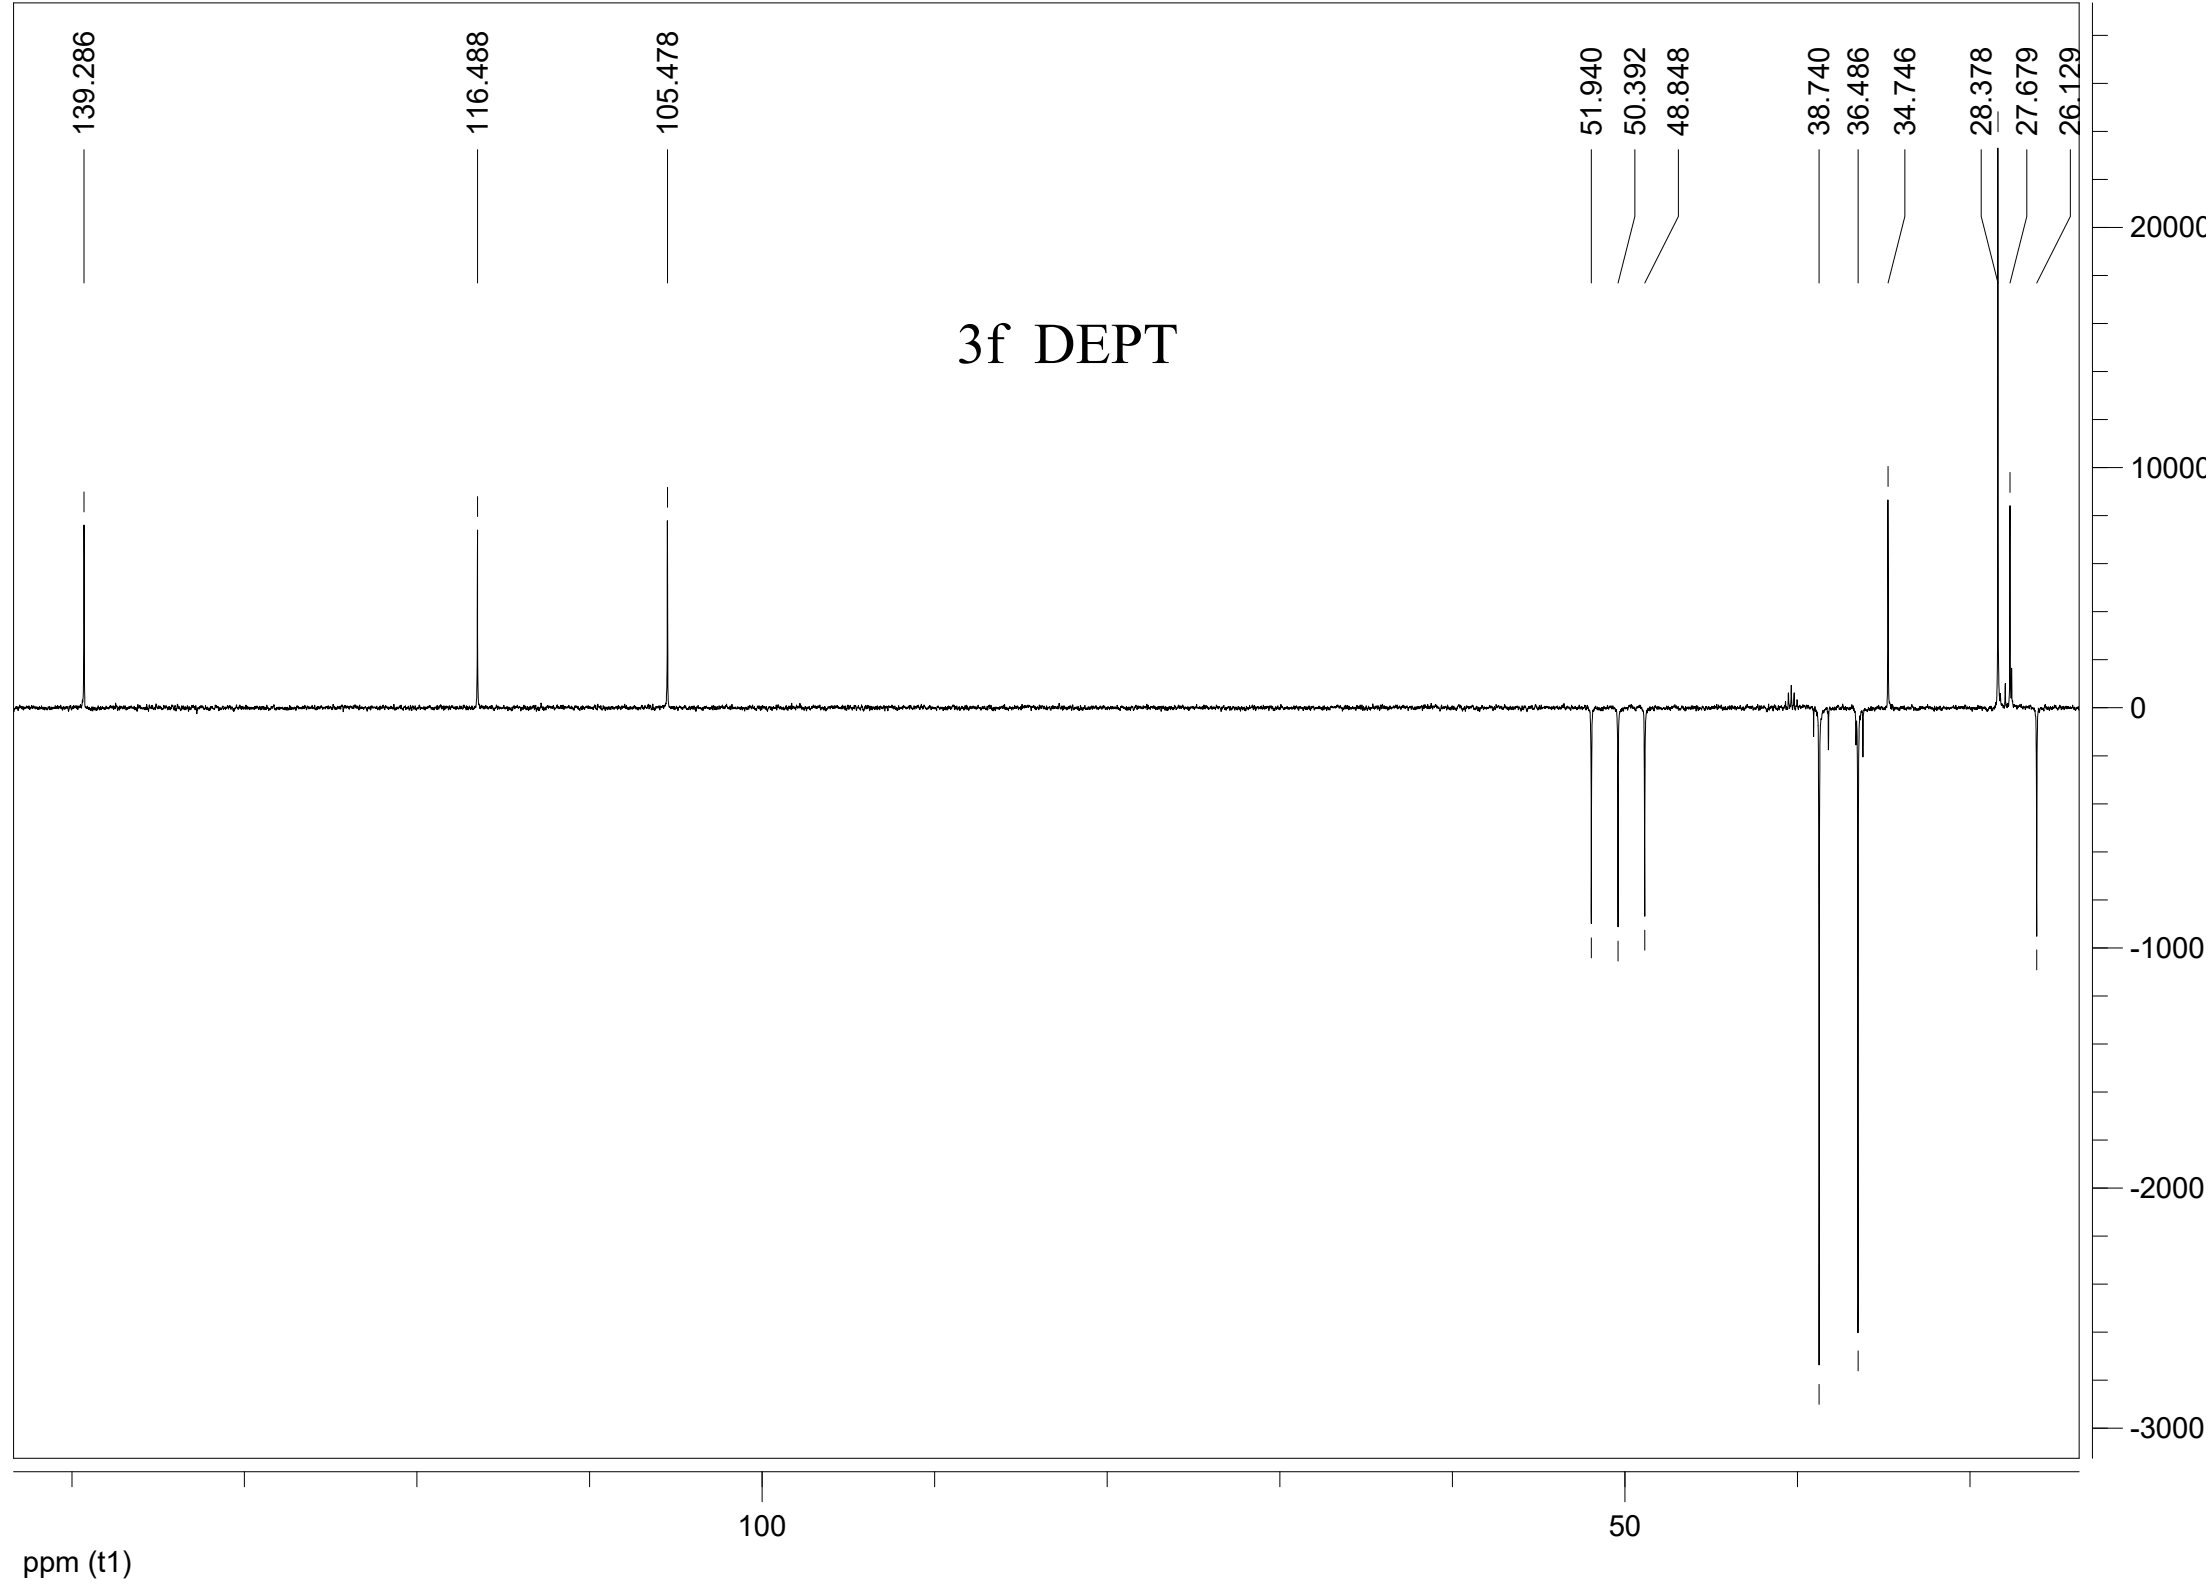

Supplement: Supplementary file 3 [file NMR.pdf › NMR.pdf]
