# Supplementary material for: Synthesis and Biological Activity of N-acyl Anabasine and Cytisine Derivatives With Adamantane, Pyridine and 1,2-azole Fragments
Source: Preprints.org preprint supplement (doi:10.20944/preprints202210.0368.v1), 2022-10-24
Supplement: Supplementary file 2 [file MS.pdf › MS.pdf]

# Qualitative Analysis Report

1a

|                        |                    |               |                           |
|------------------------|--------------------|---------------|---------------------------|
| Data Filename          | KH-2_01.d          | Sample Name   | KH-2                      |
| Sample Type            | Sample             | Position      | Vial 2                    |
| Instrument Name        | Instrument 1       | User Name     |                           |
| Acq Method             | All_2021_kol 1-6.m | Acquired Time | 7/7/2021 10:53:54 AM      |
| IRM Calibration Status | Not Applicable     | DA Method     | ChromPeakSurvey-Default.m |
| Comment                |                    |               |                           |

|              |      |                |                       |
|--------------|------|----------------|-----------------------|
| Sample Group |      | Info.          |                       |
| Stream Name  | LC 1 | Acquisition SW | 6400 Series Triple    |
|              |      | Version        | Quadrupole 10.0 (127) |

## User Chromatograms

Fragmentor Voltage 135 Collision Energy 0 Ionization Mode ESI

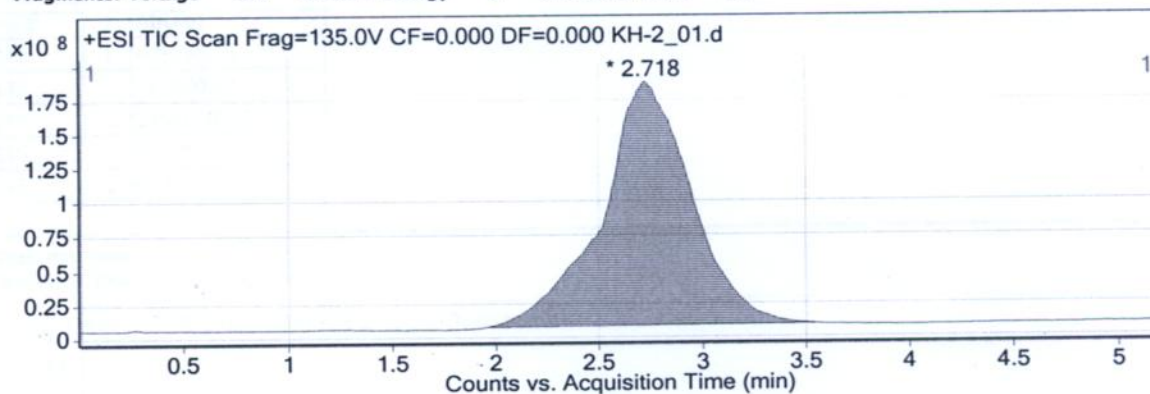

## Integration Peak List

| Peak | Start | RT    | End   | Height    | Area       | Area % |
|------|-------|-------|-------|-----------|------------|--------|
| 1    | 1,96  | 2,718 | 3,561 | 179040492 | 5424107700 | 100    |

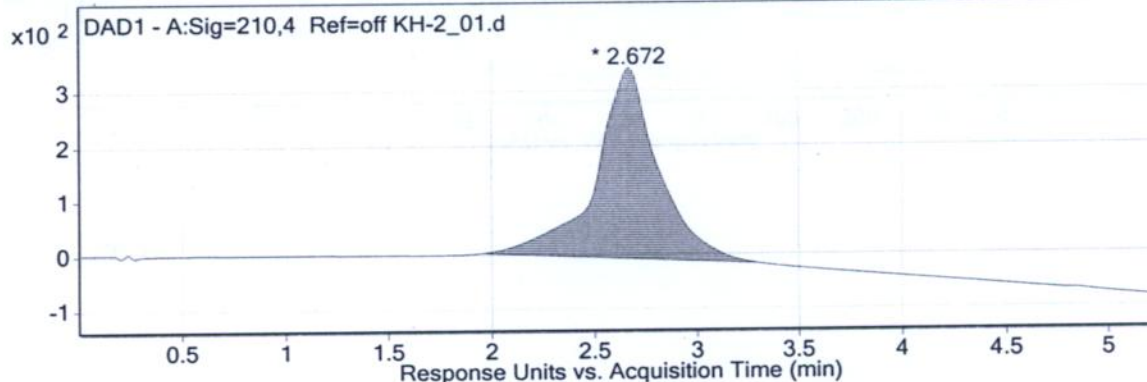

## Integration Peak List

| Peak | Start | RT    | End   | Height | Area    | Area % |
|------|-------|-------|-------|--------|---------|--------|
| 1    | 1,965 | 2,672 | 3,298 | 349,34 | 7478,49 | 100    |

## User Spectra

|                          |                    |                  |                 |
|--------------------------|--------------------|------------------|-----------------|
| Spectrum Source          | Fragmentor Voltage | Collision Energy | Ionization Mode |
| Peak (1) in "+ TIC Scan" | 135                | 0                | ESI             |

# Qualitative Analysis Report

1a

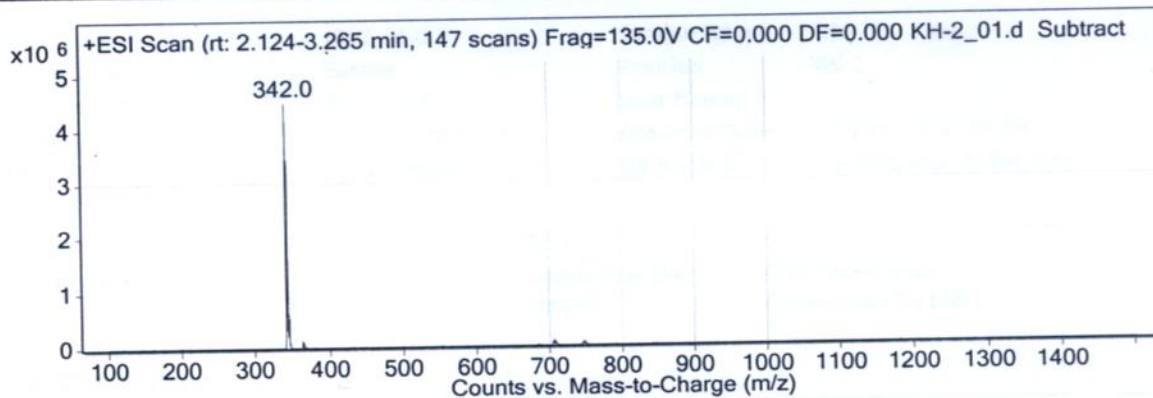

## Peak List

| m/z | z | Abund      |
|-----|---|------------|
| 342 | 1 | 4483982.5  |
| 343 | 1 | 779470.44  |
| 344 | 1 | 3454008.75 |
| 345 | 1 | 511992.94  |
| 346 | 1 | 627611     |

## Spectrum Source

Peak (1) in "DAD1 - A:Sig=210,4 Ref=off"

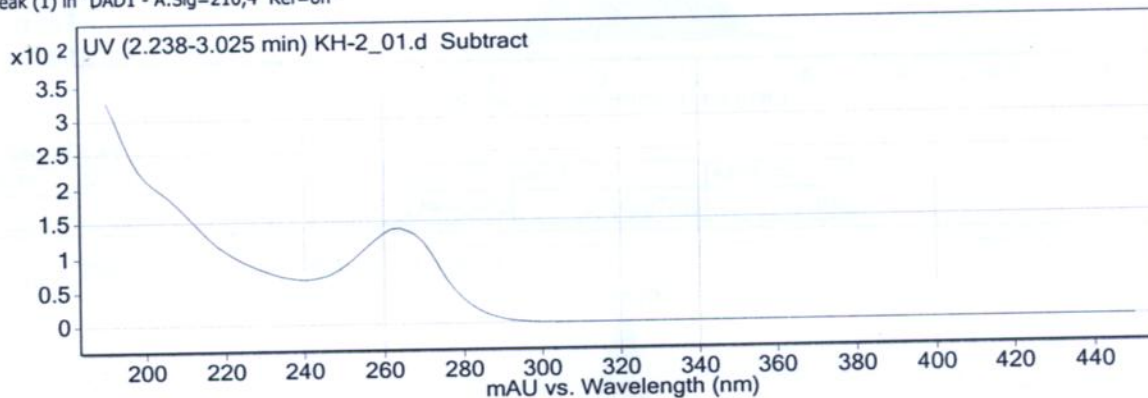

--- End Of Report ---

# Qualitative Analysis Report

1b

Data Filename KH-7\_01.d Sample Name KH-7  
 Sample Type Sample Position Vial 2  
 Instrument Name Instrument 1 User Name  
 Acq Method All\_2021\_kol 1-6.m Acquired Time 7/7/2021 11:50:12 AM  
 IRM Calibration Status Not Applicable DA Method ChromPeakSurvey-Default.m  
 Comment

Sample Group Info.  
 Stream Name LC 1 Acquisition SW 6400 Series Triple  
 Version Quadrupole 10.0 (127)

## User Chromatograms

Fragmentor Voltage 135 Collision Energy 0 Ionization Mode ESI

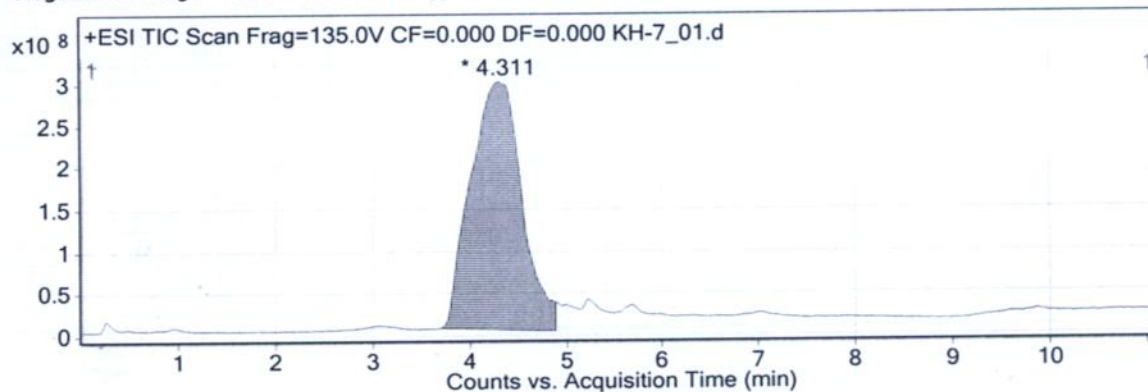

## Integration Peak List

| Peak | Start | RT    | End   | Height    | Area        | Area % |
|------|-------|-------|-------|-----------|-------------|--------|
| 1    | 3,702 | 4,311 | 4,889 | 296137102 | 10852315410 | 100    |

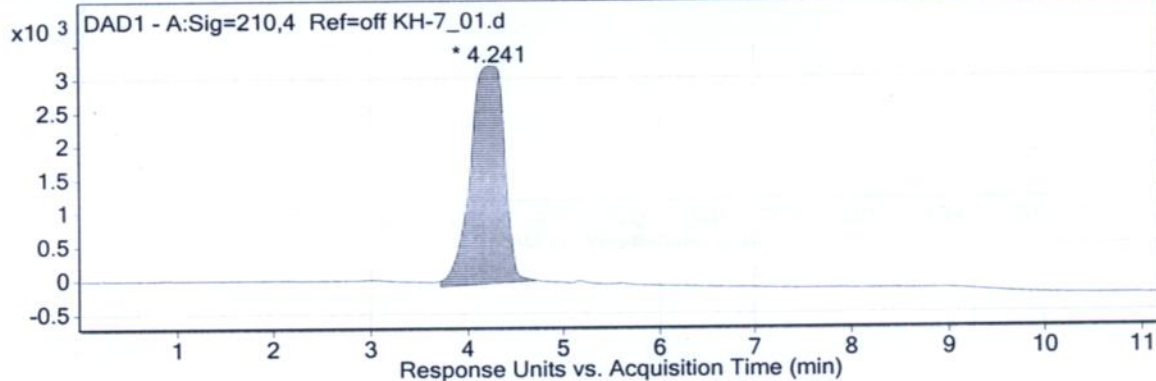

## Integration Peak List

| Peak | Start | RT    | End   | Height  | Area     | Area % |
|------|-------|-------|-------|---------|----------|--------|
| 1    | 3,721 | 4,241 | 4,714 | 3227,47 | 79221,19 | 100    |

## User Spectra

Spectrum Source Peak (1) in "+ TIC Scan" Fragmentor Voltage 135 Collision Energy 0 Ionization Mode ESI

# Qualitative Analysis Report

1b

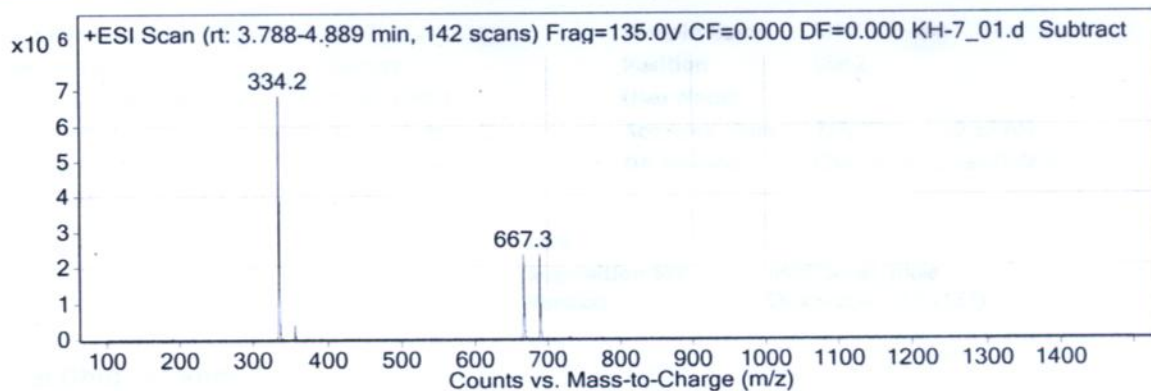

## Peak List

| m/z   | z | Abund      |
|-------|---|------------|
| 334.2 |   | 6855443    |
| 335.2 | 1 | 3895998.5  |
| 336.2 | 1 | 399113.72  |
| 356.1 |   | 413714.38  |
| 667.3 | 1 | 2352337.25 |
| 668.3 | 1 | 1043561.69 |
| 689.3 | 1 | 2347706.25 |
| 690.3 | 1 | 963482.81  |

## Spectrum Source

Peak (1) in "DAD1 - A:Sig=210,4 Ref=off"

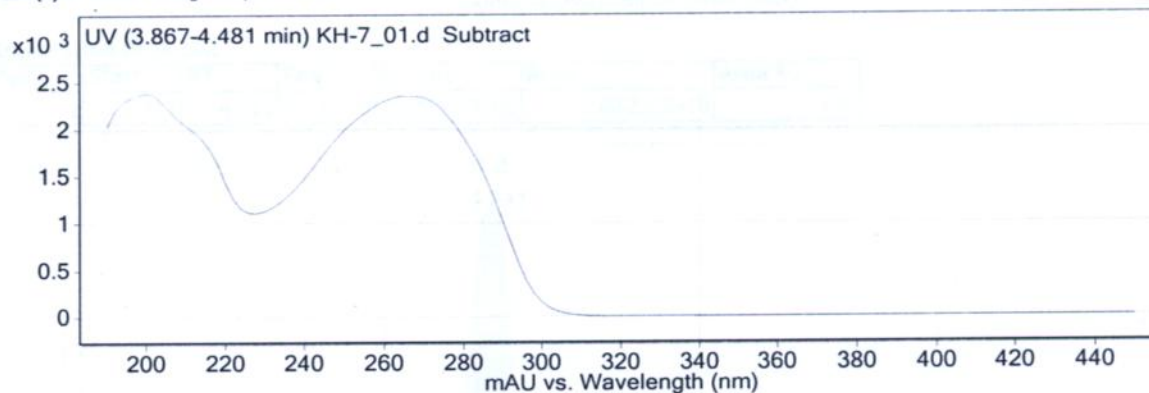

--- End Of Report ---



# Qualitative Analysis Report

1c

Data Filename KH-3\_01.d Sample Name KH-3  
 Sample Type Sample Position Vial 2  
 Instrument Name Instrument 1 User Name  
 Acq Method All\_2021\_kol 1-6.m Acquired Time 7/7/2021 11:03:42 AM  
 IRM Calibration Status Not Applicable DA Method ChromPeakSurvey-Default.m  
 Comment

Sample Group Info.  
 Stream Name LC 1 Acquisition SW 6400 Series Triple  
 Version Quadrupole 10.0 (127)

## User Chromatograms

Fragmentor Voltage 135 Collision Energy 0 Ionization Mode ESI

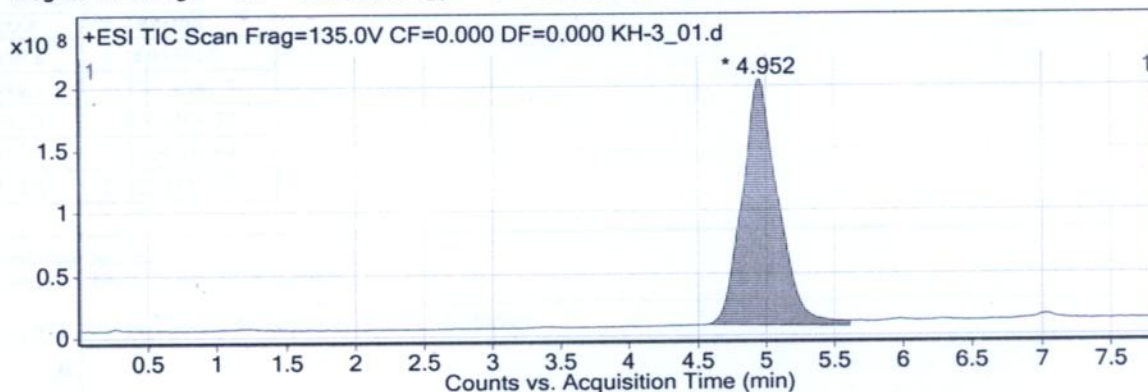

### Integration Peak List

| Peak | Start | RT    | End   | Height    | Area       | Area % |
|------|-------|-------|-------|-----------|------------|--------|
| 1    | 4,569 | 4,952 | 5,608 | 196857540 | 3582515160 | 100    |

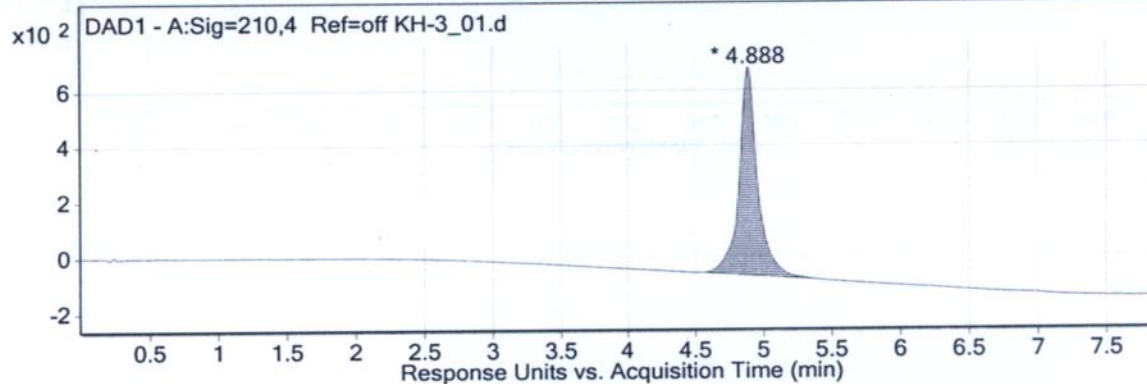

### Integration Peak List

| Peak | Start | RT    | End   | Height | Area    | Area % |
|------|-------|-------|-------|--------|---------|--------|
| 1    | 4,555 | 4,888 | 5,368 | 746,88 | 7067,83 | 100    |

## User Spectra

Spectrum Source Peak (1) in "+ TIC Scan" Fragmentor Voltage 135 Collision Energy 0 Ionization Mode ESI

# Qualitative Analysis Report

1c

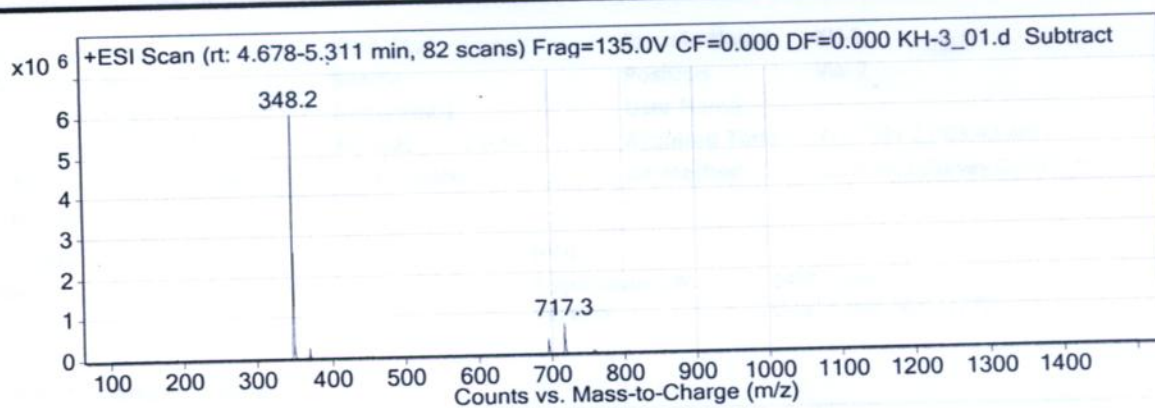

## Peak List

| m/z   | z | Abund     |
|-------|---|-----------|
| 348.2 | 1 | 6043613   |
| 349.2 | 1 | 2611541.5 |
| 695.3 |   | 364484.53 |
| 717.3 | 1 | 734109.44 |
| 718.3 | 1 | 333337.97 |

## Spectrum Source

Peak (1) in "DAD1 - A:Sig=210,4 Ref=off"

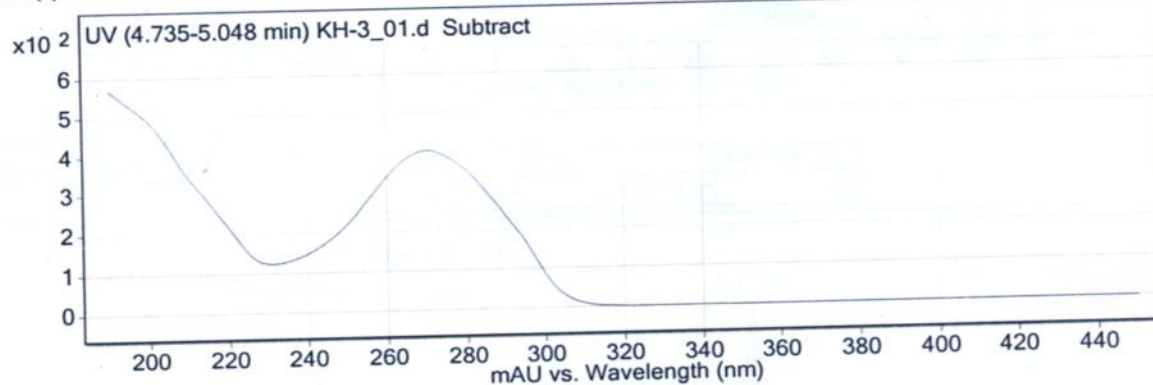

--- End Of Report ---

# Qualitative Analysis Report

1d

**Data Filename** KH-15\_01.d **Sample Name** KH-15  
**Sample Type** Sample **Position** Vial 3  
**Instrument Name** Instrument 1 **User Name**  
**Acq Method** All\_2021\_kol 1-2.m **Acquired Time** 12/9/2021 11:18:06 AM  
**IRM Calibration Status** Not Applicable **DA Method** ChromPeakSurvey-Default.m  
**Comment**

**Sample Group**  
**Stream Name** LC 1 **Info.**  
**Acquisition SW** 6400 Series Triple  
**Version** Quadrupole 10.0 (127)

## User Chromatograms

**Fragmentor Voltage** 135 **Collision Energy** 0 **Ionization Mode** ESI

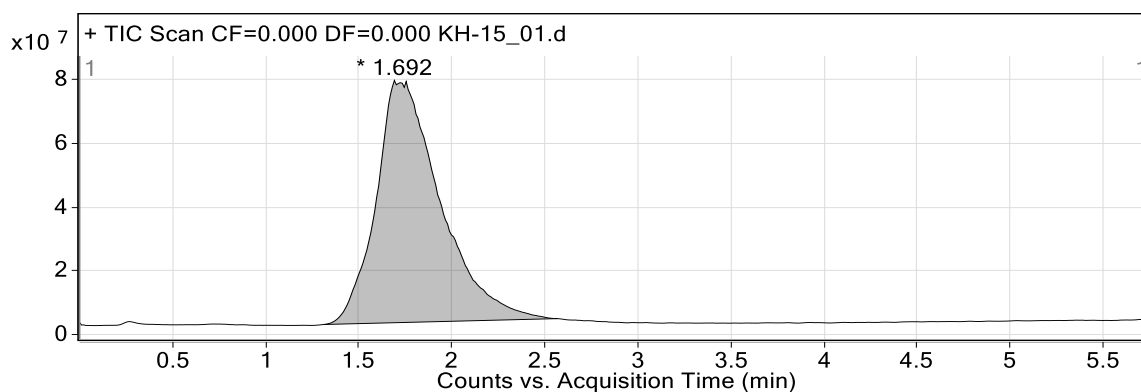

## Integration Peak List

| Peak | Start | RT    | End  | Height   | Area       | Area % |
|------|-------|-------|------|----------|------------|--------|
| 1    | 1,311 | 1,692 | 2,57 | 76132846 | 1827851718 | 100    |

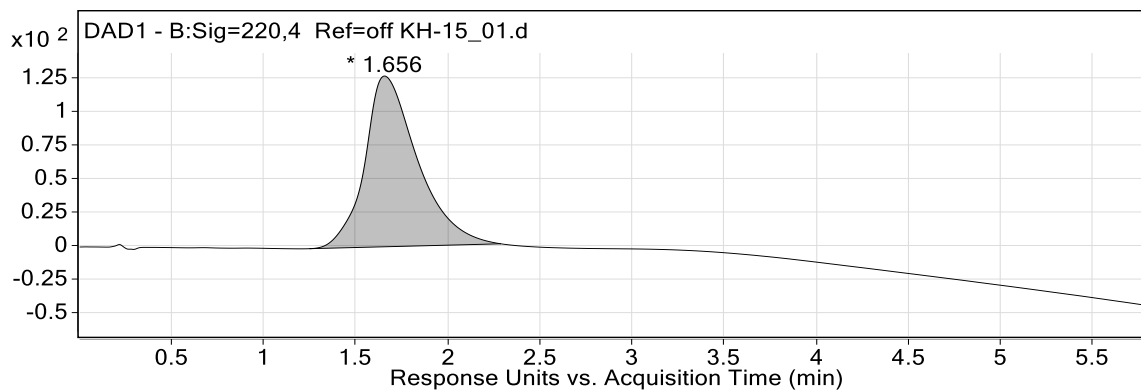

## Integration Peak List

| Peak | Start | RT    | End   | Height | Area    | Area % |
|------|-------|-------|-------|--------|---------|--------|
| 1    | 1,249 | 1,656 | 2,289 | 127,63 | 2551,63 | 100    |

## User Spectra

**Spectrum Source** Peak (1) in "+ TIC Scan" **Fragmentor Voltage** 135 **Collision Energy** 0 **Ionization Mode** ESI

# Qualitative Analysis Report

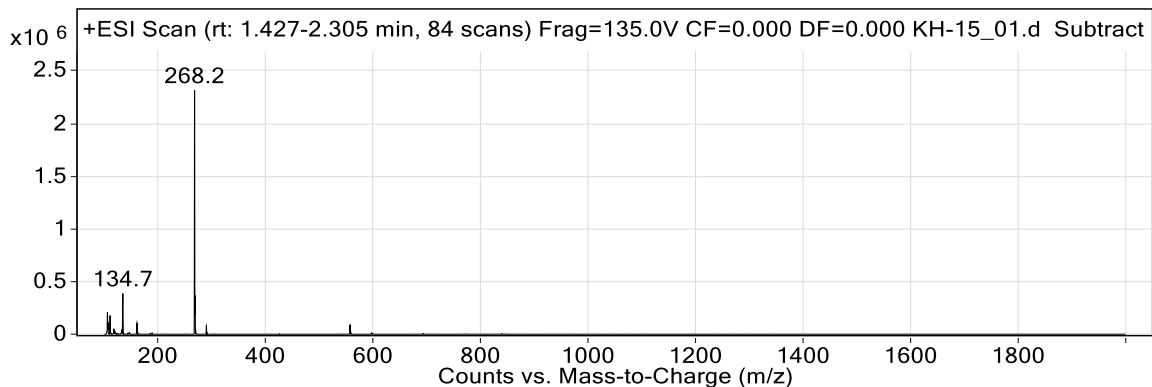

1d

## Peak List

| m/z   | z | Abund      |
|-------|---|------------|
| 106.1 |   | 209516.75  |
| 111   |   | 176026.27  |
| 134.7 | 2 | 386140.56  |
| 268.2 | 1 | 2314920.75 |
| 269.2 | 1 | 366400.03  |

## Spectrum Source

Peak (1) in "DAD1 - B:Sig=220,4 Ref=off"

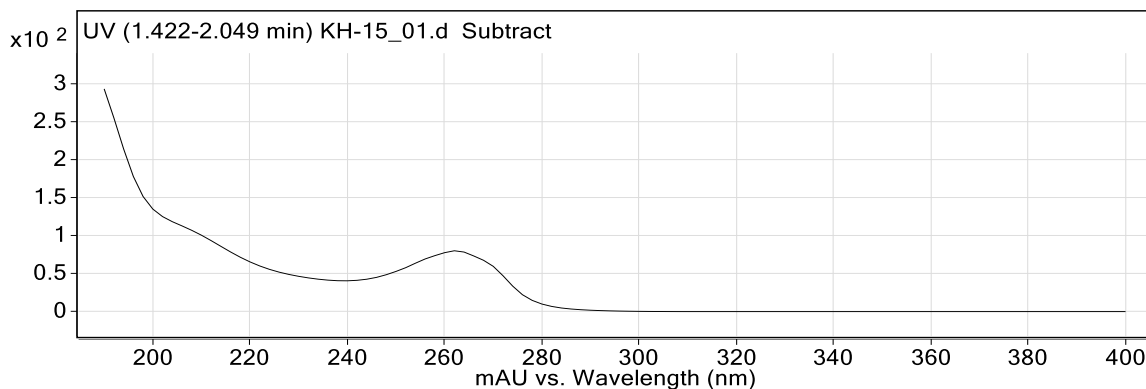

--- End Of Report ---



# Qualitative Analysis Report

1e

**Data Filename** KH-14\_02.d **Sample Name** KH-14  
**Sample Type** Sample **Position** Vial 3  
**Instrument Name** Instrument 1 **User Name**  
**Acq Method** All\_2021\_kol 1-2.m **Acquired Time** 12/9/2021 10:45:01 AM  
**IRM Calibration Status** Not Applicable **DA Method** ChromPeakSurvey-Default.m  
**Comment**

**Sample Group**  
**Stream Name** LC 1 **Info.**  
**Acquisition SW** 6400 Series Triple  
**Version** Quadrupole 10.0 (127)

## User Chromatograms

**Fragmentor Voltage** 135 **Collision Energy** 0 **Ionization Mode** ESI

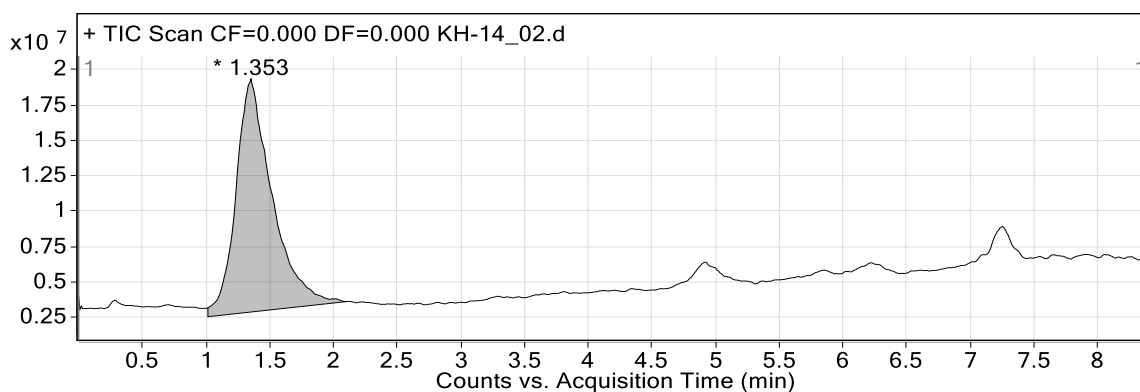

### Integration Peak List

| Peak | Start | RT    | End   | Height   | Area      | Area % |
|------|-------|-------|-------|----------|-----------|--------|
| 1    | 1,015 | 1,353 | 2,104 | 16491217 | 326122349 | 100    |

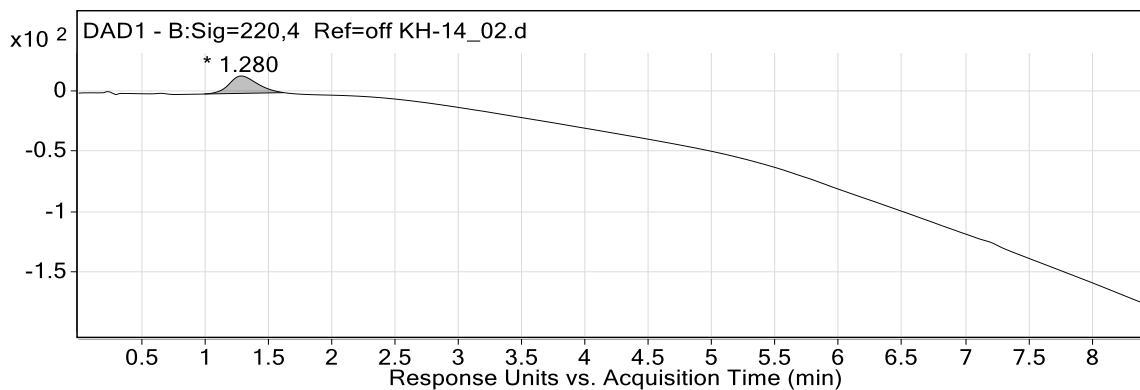

### Integration Peak List

| Peak | Start | RT   | End  | Height | Area  | Area % |
|------|-------|------|------|--------|-------|--------|
| 1    | 0,994 | 1,28 | 1,62 | 14,41  | 224,5 | 100    |

## User Spectra

**Spectrum Source** Peak (1) in "+ TIC Scan" **Fragmentor Voltage** 135 **Collision Energy** 0 **Ionization Mode** ESI

# Qualitative Analysis Report

1e

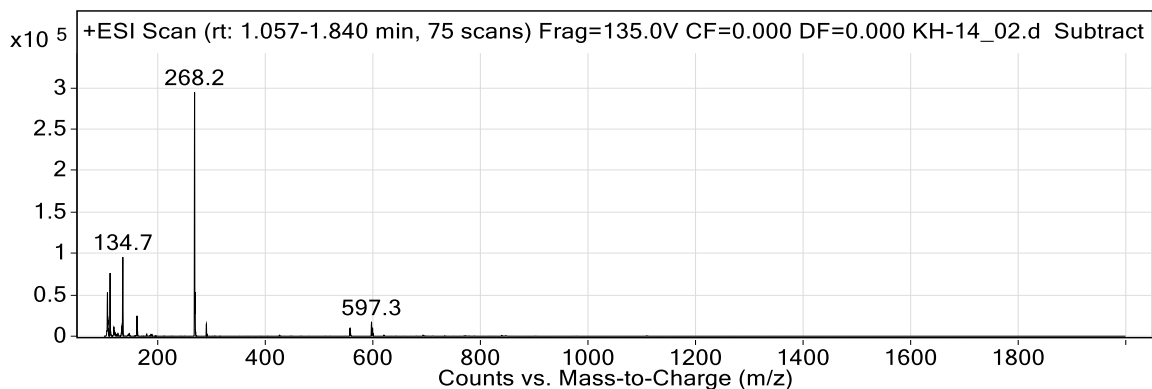

## Peak List

| m/z   | z | Abund     |
|-------|---|-----------|
| 106.1 |   | 52663.57  |
| 107.1 |   | 19463.6   |
| 111.1 |   | 76161.67  |
| 134.7 | 2 | 95331.52  |
| 161.1 |   | 24623.17  |
| 268.2 | 1 | 294176.53 |
| 269.2 | 1 | 53026.48  |
| 290.2 |   | 14820.42  |
| 597.3 |   | 16650.44  |

## Spectrum Source

Peak (1) in "DAD1 - B:Sig=220,4 Ref=off"

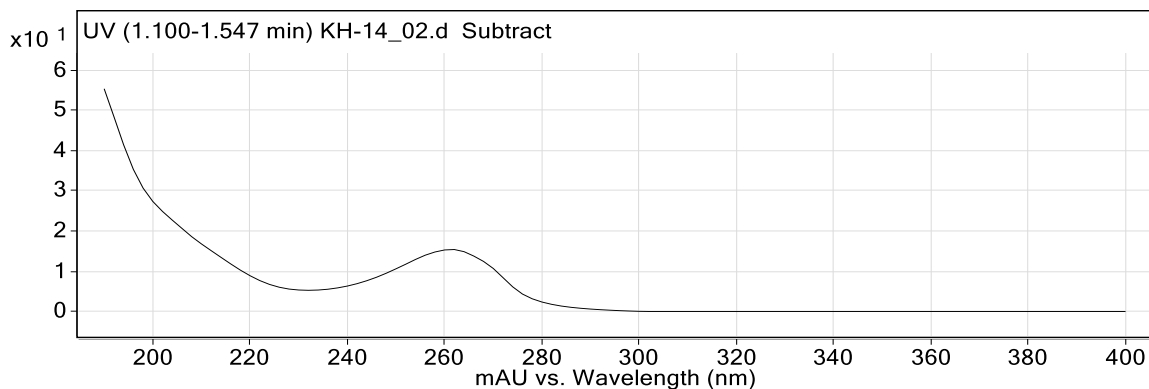

--- End Of Report ---

# Qualitative Analysis Report

1f

Data Filename KH-10\_02.d Sample Name KH-10  
 Sample Type Sample Position Vial 2  
 Instrument Name Instrument 1 User Name  
 Acq Method All\_2021\_kol 1-6.m Acquired Time 7/7/2021 12:53:56 PM  
 IRM Calibration Status Not Applicable DA Method ChromPeakSurvey-Default.m  
 Comment

Sample Group Info.  
 Stream Name LC 1 Acquisition SW 6400 Series Triple  
 Version Quadrupole 10.0 (127)

## User Chromatograms

Fragmentor Voltage 135 Collision Energy 0 Ionization Mode ESI

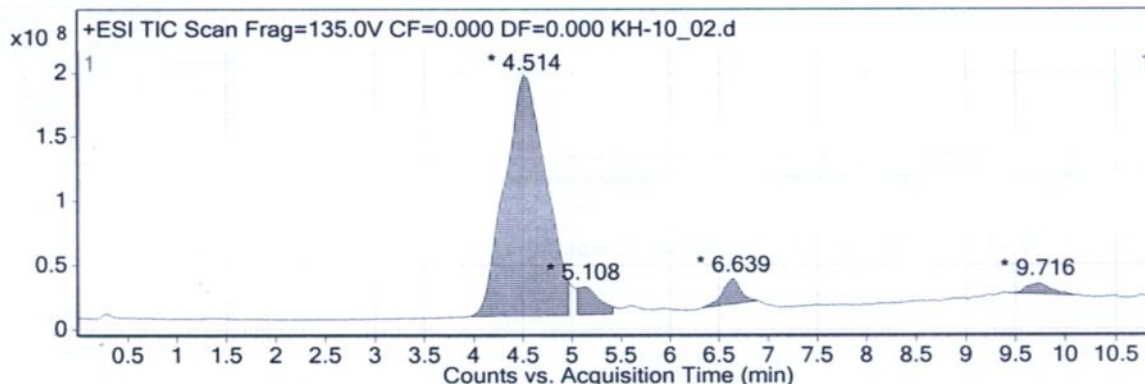

### Integration Peak List

| Peak | Start | RT    | End    | Height    | Area       | Area % |
|------|-------|-------|--------|-----------|------------|--------|
| 1    | 3,968 | 4,514 | 4,959  | 186829894 | 5411004220 | 100    |
| 2    | 5,045 | 5,108 | 5,413  | 21549467  | 316606693  | 5,85   |
| 3    | 6,319 | 6,639 | 6,889  | 19226173  | 248490324  | 4,59   |
| 4    | 9,466 | 9,716 | 10,107 | 8659998   | 139787732  | 2,58   |

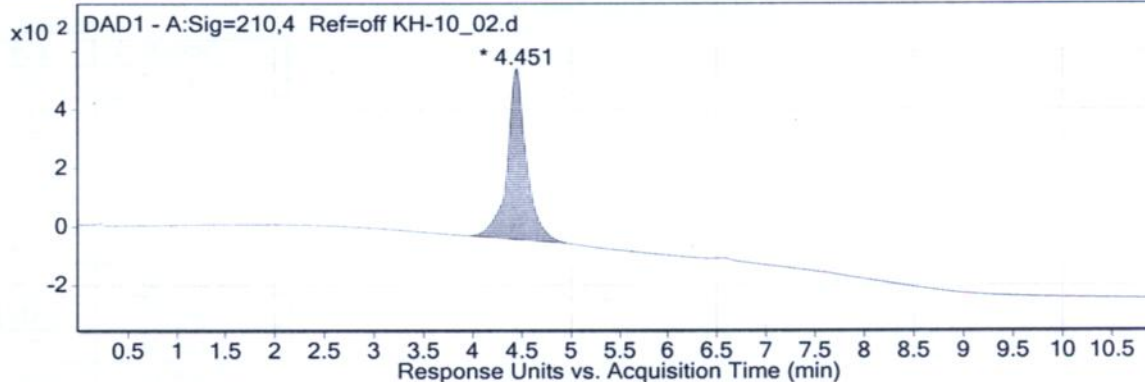

### Integration Peak List

| Peak | Start | RT    | End   | Height | Area    | Area % |
|------|-------|-------|-------|--------|---------|--------|
| 1    | 3,951 | 4,451 | 4,957 | 585,16 | 8014,72 | 100    |

## User Spectra

Spectrum Source Peak (1) in "+ TIC Scan" Fragmentor Voltage 135 Collision Energy 0 Ionization Mode ESI

# Qualitative Analysis Report

1f

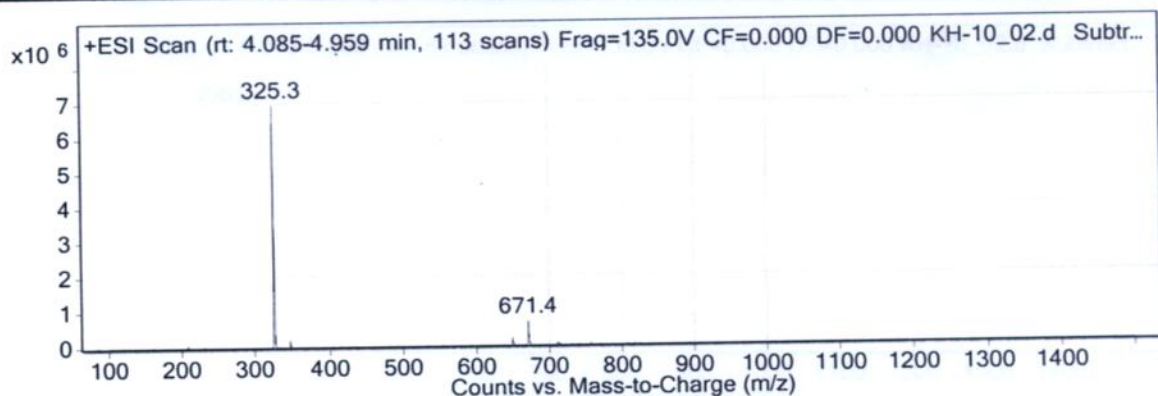

## Peak List

| m/z   | Abund     |
|-------|-----------|
| 325.3 | 6969857   |
| 326.2 | 3419790.5 |
| 671.4 | 694387.19 |

Spectrum Source      Fragmentor Voltage      Collision Energy      Ionization Mode  
Peak (2) in "+ TIC Scan"      135      0      ESI

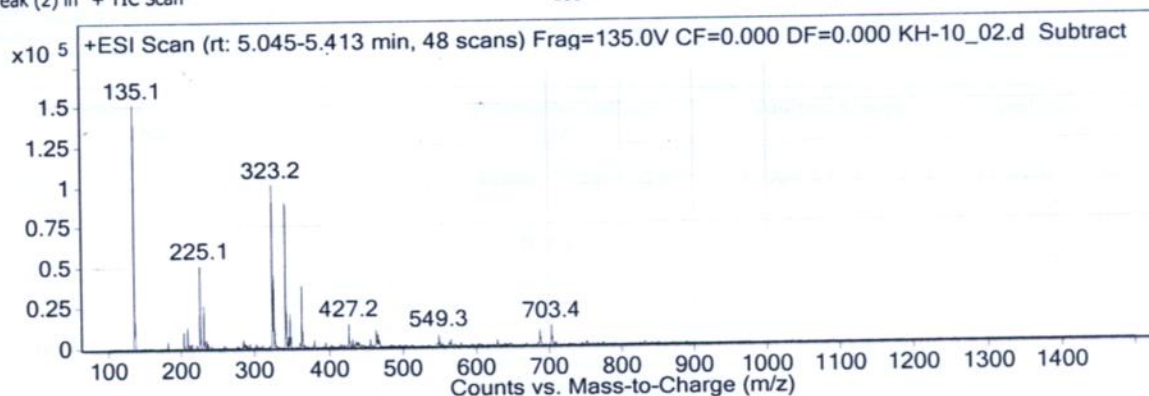

## Peak List

| m/z   | z | Abund     |
|-------|---|-----------|
| 135.1 | 1 | 151371.75 |
| 225.1 |   | 50977.1   |
| 230.2 |   | 26681.79  |
| 323.2 |   | 100920.01 |
| 324.3 |   | 24925.95  |
| 325.2 | 1 | 44495.69  |
| 341.2 | 1 | 89726.94  |
| 342.2 | 1 | 21968.41  |
| 347.2 |   | 21161.31  |
| 363.2 | 1 | 38406.2   |

Spectrum Source      Fragmentor Voltage      Collision Energy      Ionization Mode  
Peak (3) in "+ TIC Scan"      135      0      ESI

# Qualitative Analysis Report

1f

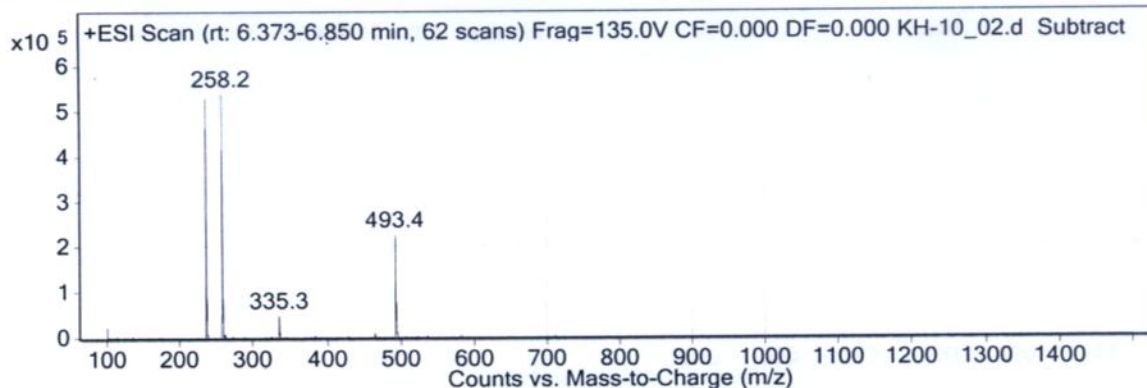

## Peak List

| m/z   | z | Abund     |
|-------|---|-----------|
| 236.2 | 1 | 530022.06 |
| 237.2 | 1 | 86117.61  |
| 258.2 | 1 | 539195.81 |
| 259.2 | 1 | 86259.48  |
| 335.3 |   | 48151.04  |
| 493.4 | 1 | 226153.64 |
| 494.4 | 1 | 76522.74  |

## Spectrum Source

Peak (4) in "+ TIC Scan"

Fragmentor Voltage

135

Collision Energy

0

Ionization Mode

ESI

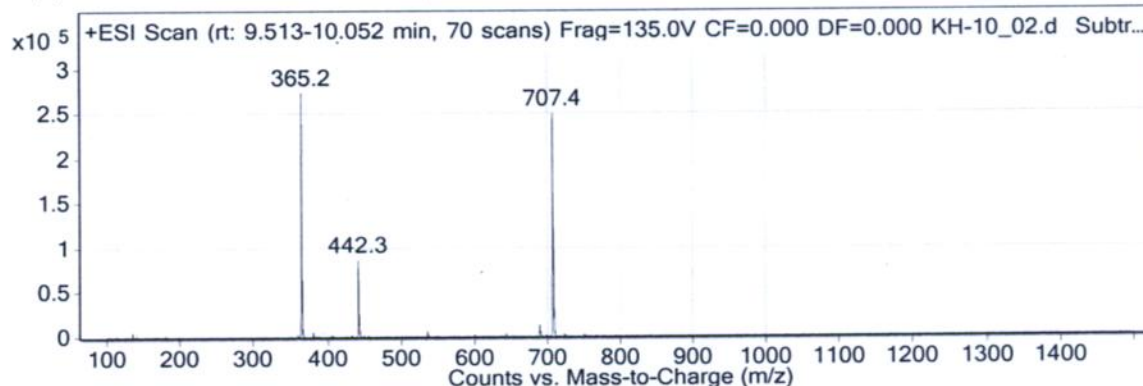

## Peak List

| m/z   | z | Abund     |
|-------|---|-----------|
| 365.2 | 1 | 273867.41 |
| 366.2 | 1 | 65232.78  |
| 442.3 | 1 | 87042.62  |
| 443.3 | 1 | 25555.42  |
| 707.4 | 1 | 250704.56 |
| 708.4 | 1 | 121372.04 |
| 709.4 | 1 | 31058.05  |

## Spectrum Source

Peak (1) in "DAD1 - A:Sig=210,4 Ref=off"



# Qualitative Analysis Report

2a

|                               |                    |                      |                           |
|-------------------------------|--------------------|----------------------|---------------------------|
| <b>Data Filename</b>          | KH-2--Me-i_01.d    | <b>Sample Name</b>   | KH-2--Me-i                |
| <b>Sample Type</b>            | Sample             | <b>Position</b>      | Vial 2                    |
| <b>Instrument Name</b>        | Instrument 1       | <b>User Name</b>     |                           |
| <b>Acq Method</b>             | All_2021_kol 1-6.m | <b>Acquired Time</b> | 7/7/2021 2:02:00 PM       |
| <b>IRM Calibration Status</b> | Not Applicable     | <b>DA Method</b>     | ChromPeakSurvey-Default.m |
| <b>Comment</b>                |                    |                      |                           |

|                     |      |                       |                       |
|---------------------|------|-----------------------|-----------------------|
| <b>Sample Group</b> |      | <b>Info.</b>          |                       |
| <b>Stream Name</b>  | LC 1 | <b>Acquisition SW</b> | 6400 Series Triple    |
|                     |      | <b>Version</b>        | Quadrupole 10.0 (127) |

## User Chromatograms

Fragmentor Voltage 135 Collision Energy 0 Ionization Mode ESI

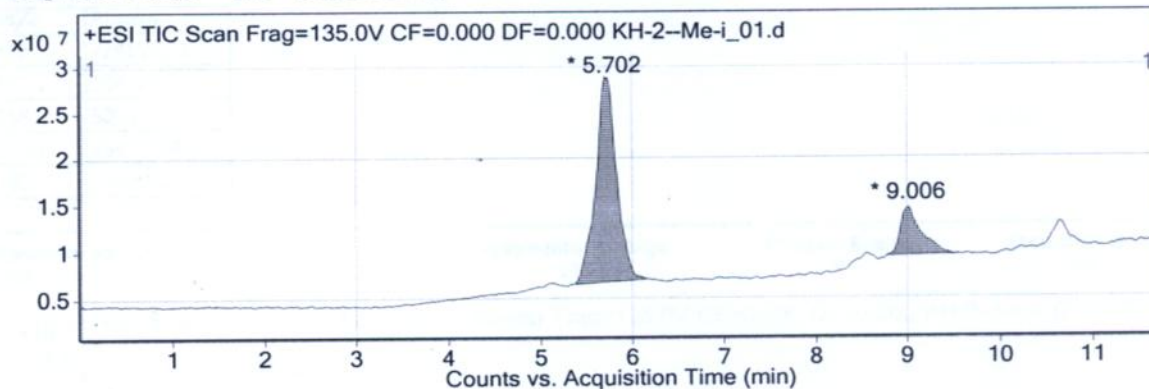

### Integration Peak List

| Peak | Start | RT    | End   | Height   | Area      | Area % |
|------|-------|-------|-------|----------|-----------|--------|
| 1    | 5,334 | 5,702 | 6,162 | 22168066 | 349313956 | 100    |
| 2    | 8,771 | 9,006 | 9,56  | 5141560  | 79236691  | 22,68  |

DAD1 - A:Si=210.4 Ref=off KH-2--Me-i\_01.d

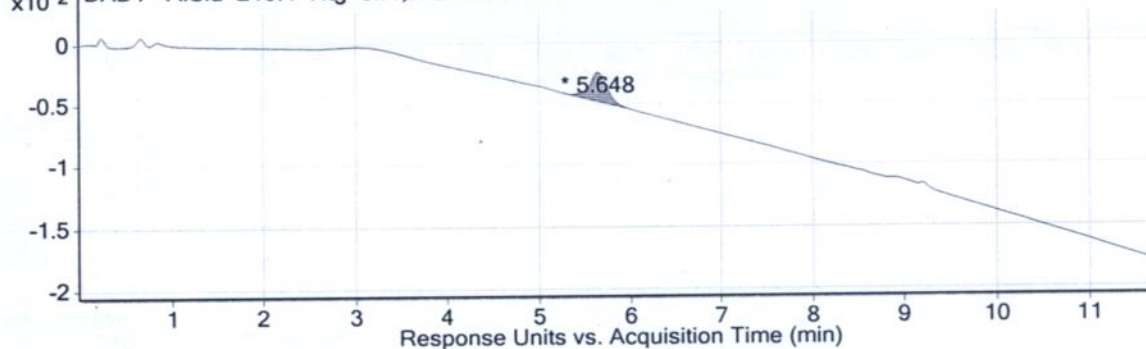

### Integration Peak List

| Peak | Start | RT    | End   | Height | Area   | Area % |
|------|-------|-------|-------|--------|--------|--------|
| 1    | 5,261 | 5,648 | 5,968 | 23,77  | 316,46 | 100    |

## User Spectra

|                          |                           |                         |                        |
|--------------------------|---------------------------|-------------------------|------------------------|
| <b>Spectrum Source</b>   | <b>Fragmentor Voltage</b> | <b>Collision Energy</b> | <b>Ionization Mode</b> |
| Peak (1) in "+ TIC Scan" | 135                       | 0                       | ESI                    |

# Qualitative Analysis Report

2a

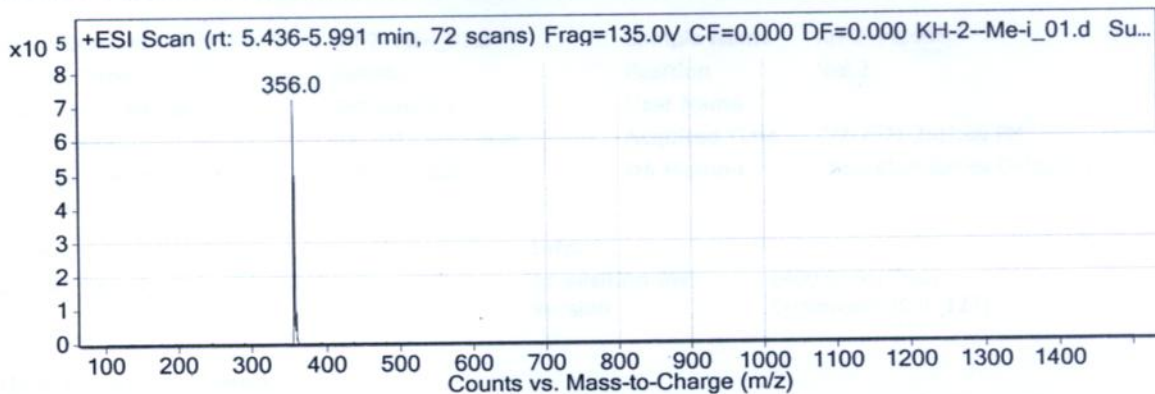

## Peak List

| m/z   | Abund     |
|-------|-----------|
| 356   | 724197.31 |
| 357.1 | 124073.7  |
| 358   | 500415.69 |
| 359.1 | 85457.09  |
| 360   | 96420.07  |

Spectrum Source  
Peak (2) in "+ TIC Scan"

Fragmentor Voltage  
135

Collision Energy  
0

Ionization Mode  
ESI

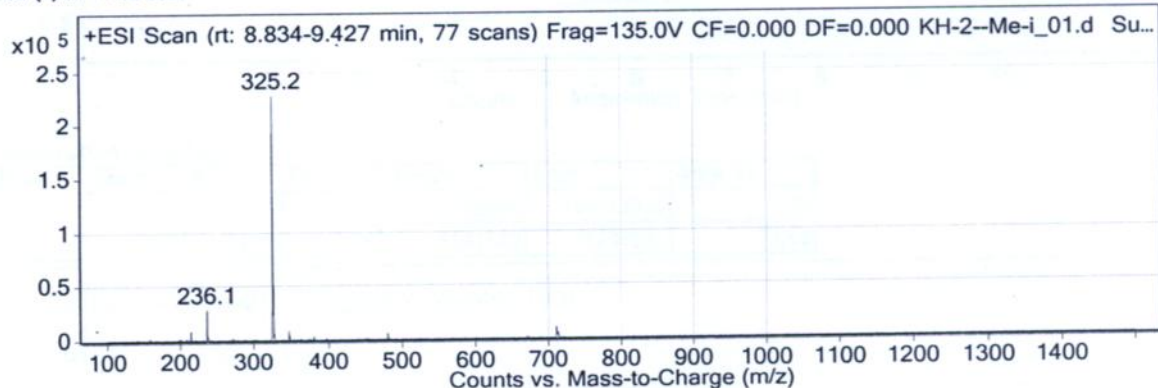

## Peak List

| m/z   | z | Abund     |
|-------|---|-----------|
| 236.1 |   | 28168.8   |
| 325.2 | 1 | 228032.73 |
| 326.2 | 1 | 51696.23  |

Spectrum Source  
Peak (1) in "DAD1 - A:Sig=210,4 Ref=off"

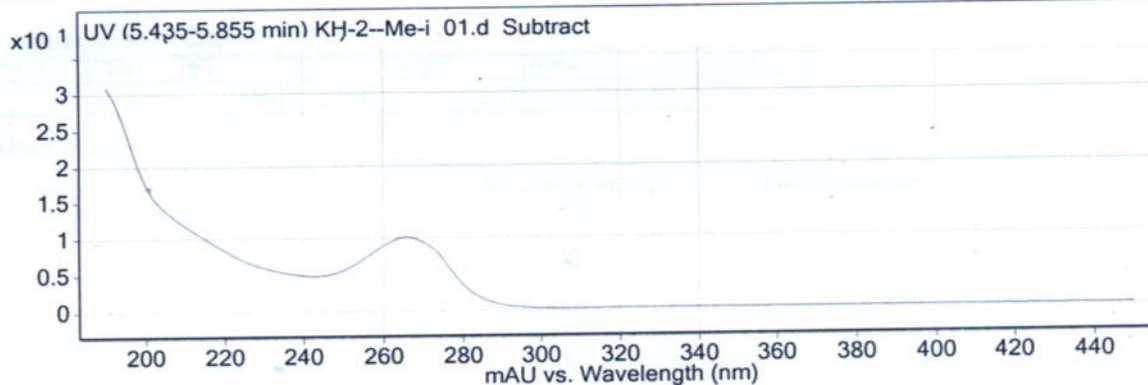

--- End Of Report ---

Qualitative Analysis Report

2b

Data Filename

Sample Type

Instrument Name

Acq Method

IRM Calibration Status

Comment

Sample Group

Stream Name

KH-7--Me-i\_01.d

Sample

Instrument 1

All\_2021\_kol 1-6.m

Not Applicable

LC 1

Sample Name

Position

User Name

Acquired Time

DA Method

Info.

Acquisition SW

Version

KH-7-Me-i

Vial 2

7/7/2021 2:33:54 PM

ChromPeakSurvey-Default.m

6400 Series Triple

Quadrupole 10.0 (127)

User Chromatograms

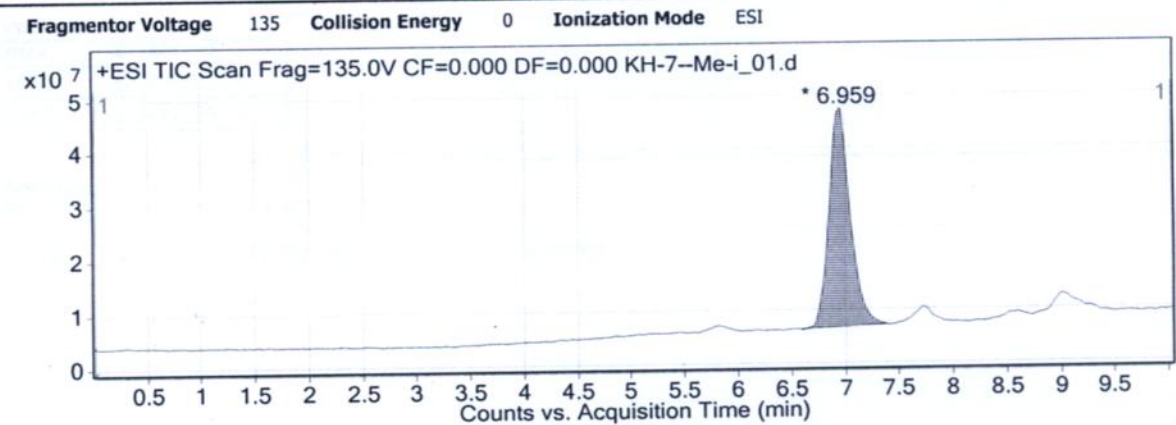

Integration Peak List

| Peak | Start | RT    | End   | Height   | Area      | Area % |
|------|-------|-------|-------|----------|-----------|--------|
| 1    | 6,576 | 6,959 | 7,389 | 40689006 | 555865563 | 100    |

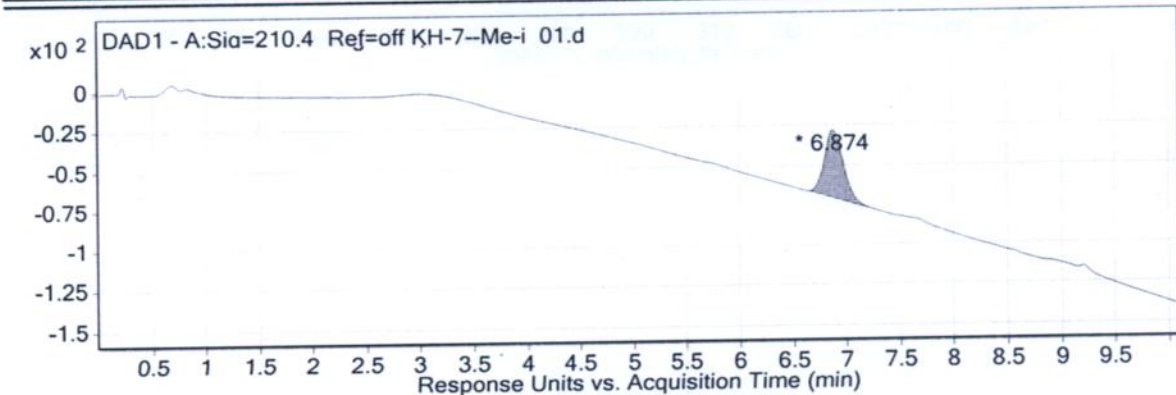

Integration Peak List

| Peak | Start | RT    | End   | Height | Area   | Area % |
|------|-------|-------|-------|--------|--------|--------|
| 1    | 6,668 | 6,874 | 7,234 | 42,42  | 513,74 | 100    |

User Spectra

| Spectrum Source          | Fragmentor Voltage | Collision Energy | Ionization Mode |
|--------------------------|--------------------|------------------|-----------------|
| Peak (1) in "+ TIC Scan" | 135                | 0                | ESI             |



# Qualitative Analysis Report

2b

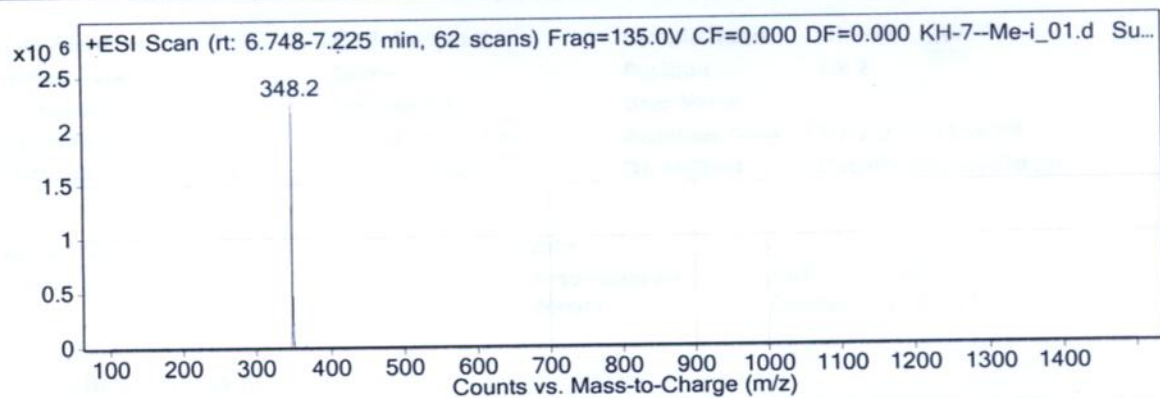

## Peak List

| m/z   | z | Abund     |
|-------|---|-----------|
| 348.2 | 1 | 2260211.5 |
| 349.2 | 1 | 472039.06 |

## Spectrum Source

Peak (1) in "DAD1 - A:Sig=210,4 Ref=off"

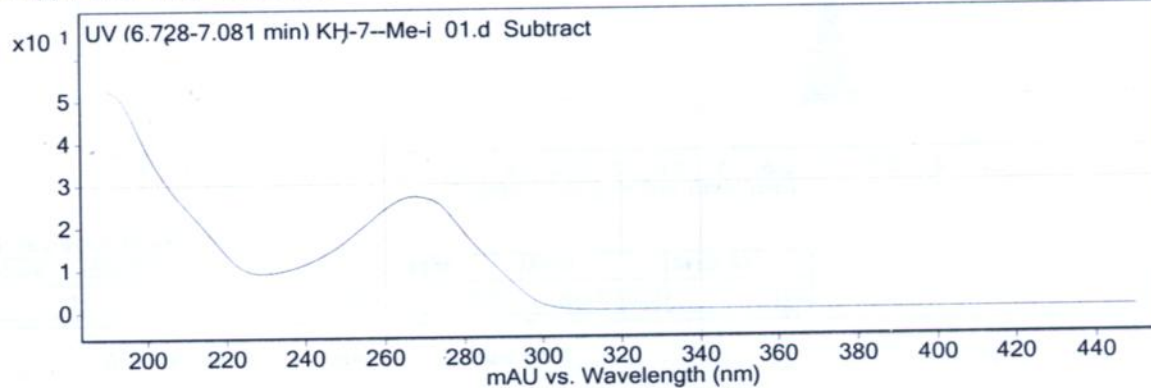

--- End Of Report ---

# Qualitative Analysis Report

2c

Data Filename KH-3--Me-i\_01.d Sample Name KH-3--Me-i  
Sample Type Sample Position Vial 2  
Instrument Name Instrument 1 User Name  
Acq Method All\_2021\_kol 1-6.m Acquired Time 7/7/2021 2:18:29 PM  
IRM Calibration Status Not Applicable DA Method ChromPeakSurvey-Default.m  
Comment

Sample Group Info.  
Stream Name LC 1 Acquisition SW 6400 Series Triple  
Version Quadrupole 10.0 (127)

## User Chromatograms

Fragmentor Voltage 135 Collision Energy 0 Ionization Mode ESI

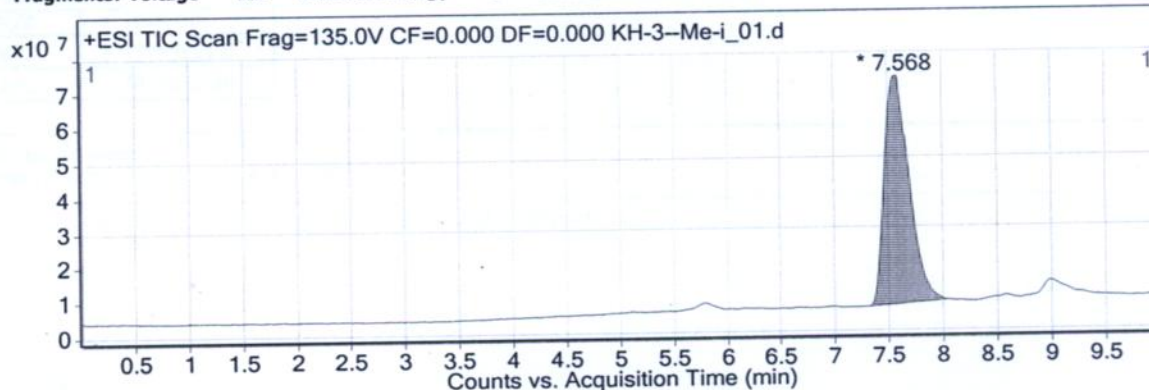

### Integration Peak List

| Peak | Start | RT    | End   | Height   | Area       | Area % |
|------|-------|-------|-------|----------|------------|--------|
| 1    | 7,318 | 7,568 | 8,045 | 65846696 | 1043858244 | 100    |

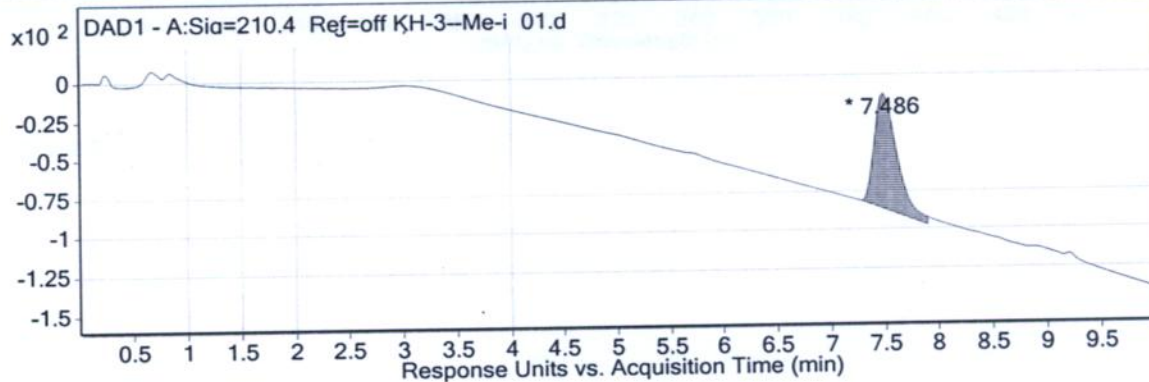

### Integration Peak List

| Peak | Start | RT    | End   | Height | Area    | Area % |
|------|-------|-------|-------|--------|---------|--------|
| 1    | 7,273 | 7,486 | 7,893 | 74,09  | 1073,79 | 100    |

## User Spectra

Spectrum Source Fragmentor Voltage Collision Energy Ionization Mode  
Peak (1) in "+ TIC Scan" 135 0 ESI



# Qualitative Analysis Report

2c

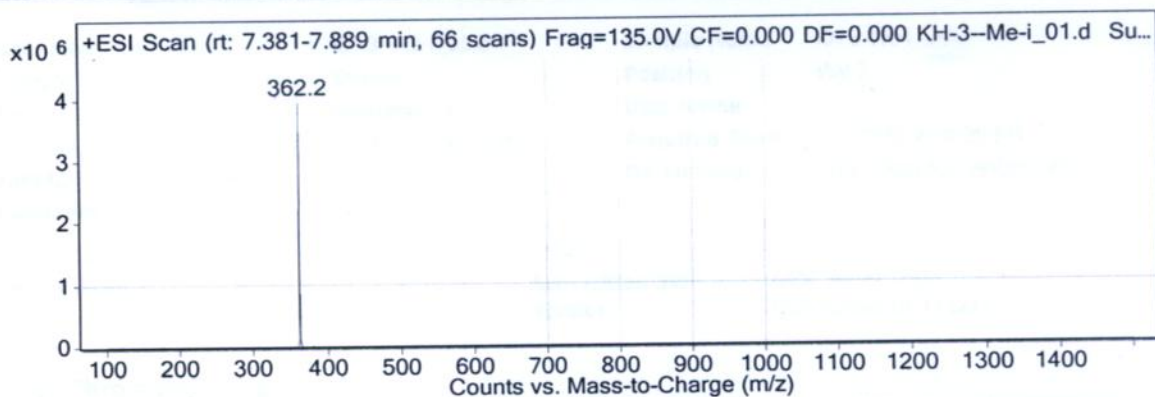

## Peak List

| m/z   | z | Abund     |
|-------|---|-----------|
| 362.2 | 1 | 3955921.5 |
| 363.2 | 1 | 870050.88 |

## Spectrum Source

Peak (1) in "DAD1 - A:Sig=210,4 Ref=off"

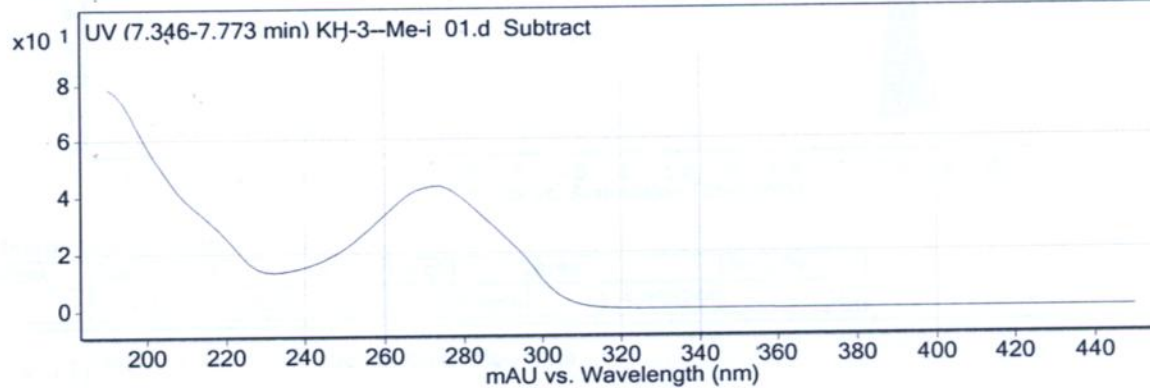

--- End Of Report ---

# Qualitative Analysis Report

2d

**Data Filename** KH-15 MeI\_01.d **Sample Name** KH-15 MeI  
**Sample Type** Sample **Position** Vial 3  
**Instrument Name** Instrument 1 **User Name**  
**Acq Method** All\_2021\_kol 1-2.m **Acquired Time** 12/9/2021 11:28:57 AM  
**IRM Calibration Status** Not Applicable **DA Method** ChromPeakSurvey-Default.m  
**Comment**

**Sample Group**  
**Stream Name** LC 1 **Info.**  
**Acquisition SW** 6400 Series Triple  
**Version** Quadrupole 10.0 (127)

## User Chromatograms

**Fragmentor Voltage** 135 **Collision Energy** 0 **Ionization Mode** ESI

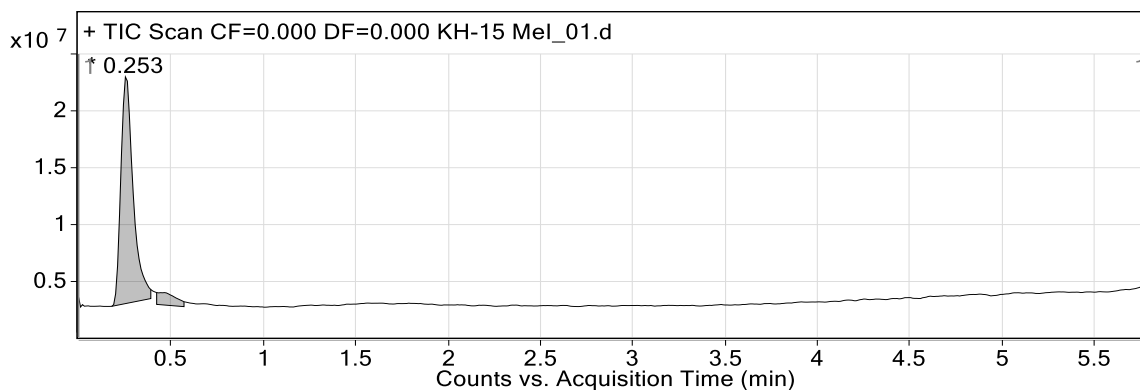

## Integration Peak List

| Peak | Start | RT    | End   | Height   | Area     | Area % |
|------|-------|-------|-------|----------|----------|--------|
| 1    | 0,179 | 0,253 | 0,391 | 19910677 | 93371174 | 100    |
| 2    | 0,423 | 0,423 | 0,571 | 1037298  | 7379516  | 7,9    |

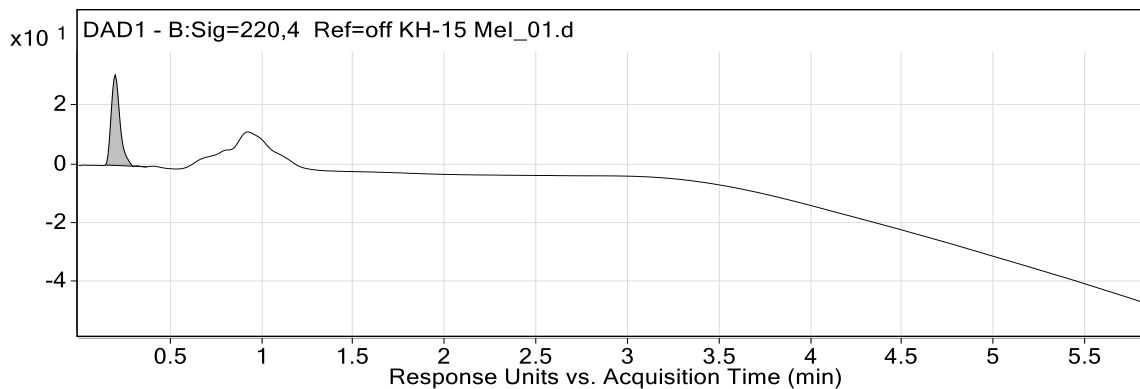

## Integration Peak List

| Peak | Start | RT    | End   | Height | Area   | Area % |
|------|-------|-------|-------|--------|--------|--------|
| 1    | 0,148 | 0,202 | 0,375 | 30,82  | 103,38 | 100    |

## User Spectra

**Spectrum Source** Peak (1) in "+ TIC Scan" **Fragmentor Voltage** 135 **Collision Energy** 0 **Ionization Mode** ESI

# Qualitative Analysis Report

2d

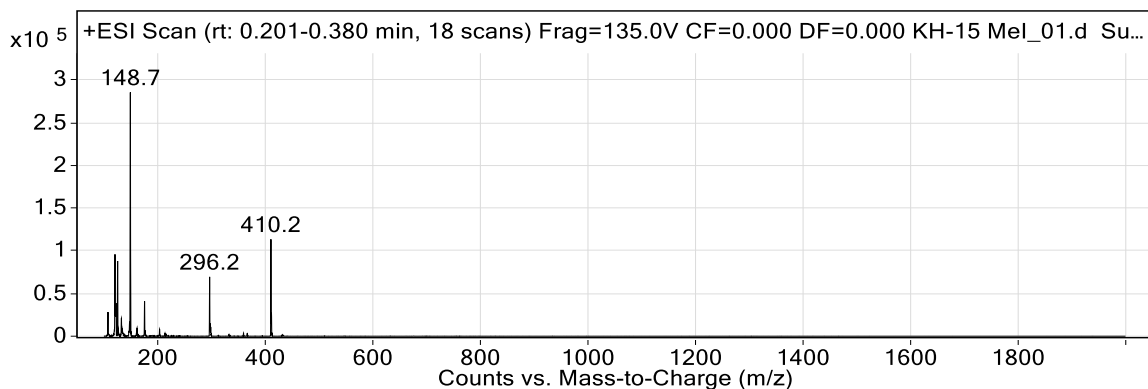

## Peak List

| m/z   | z | Abund     |
|-------|---|-----------|
| 107.1 |   | 28257.09  |
| 120.1 |   | 95891.42  |
| 121   |   | 30142.12  |
| 122.1 |   | 38542.47  |
| 125.1 |   | 88000.17  |
| 148.7 | 2 | 285469.94 |
| 175.2 |   | 40868.9   |
| 296.2 | 1 | 69469.74  |
| 410.2 |   | 113481.53 |
| 411.3 |   | 25604.78  |

## Spectrum Source

Peak (2) in "+ TIC Scan"

## Fragmentor Voltage

135

## Collision Energy

0

## Ionization Mode

ESI

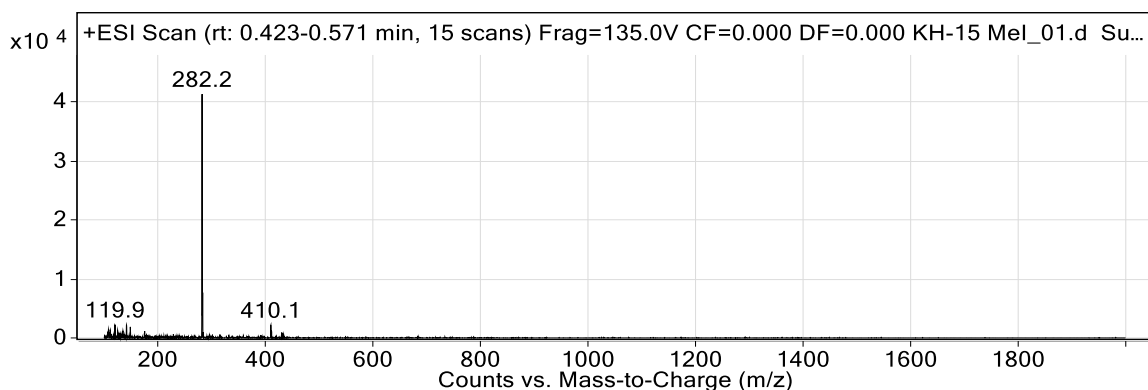

## Peak List

| m/z   | z | Abund    |
|-------|---|----------|
| 119.9 |   | 2238.09  |
| 120.3 |   | 2179.19  |
| 141.5 | 2 | 2191.59  |
| 282.2 | 1 | 41304.45 |
| 283.2 | 1 | 7687.95  |
| 410.1 |   | 2190.64  |

## Spectrum Source

Peak (1) in "DAD1 - B:Sig=220,4 Ref=off"

# Qualitative Analysis Report

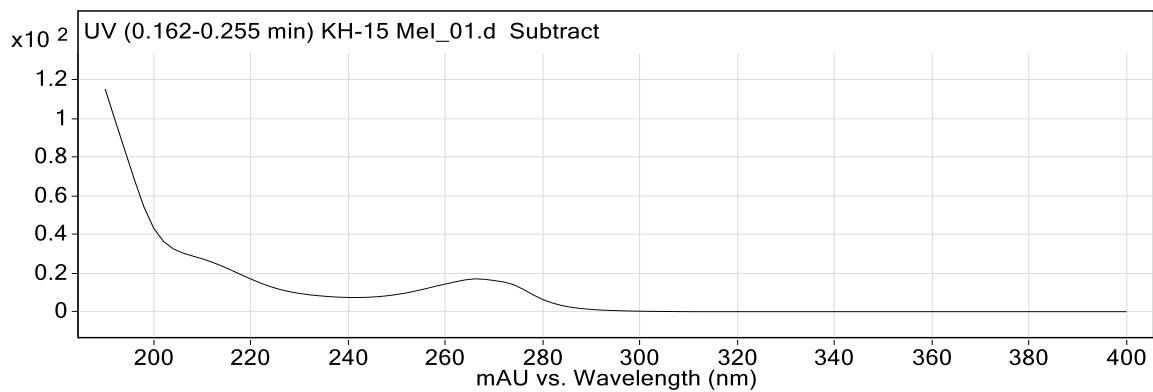

2d

--- End Of Report ---

# Qualitative Analysis Report

2e

**Data Filename** KH-14 MeI\_02.d **Sample Name** KH-14 MeI  
**Sample Type** Sample **Position** Vial 3  
**Instrument Name** Instrument 1 **User Name**  
**Acq Method** All\_2021\_kol 1-2.m **Acquired Time** 12/9/2021 11:07:47 AM  
**IRM Calibration Status** Not Applicable **DA Method** ChromPeakSurvey-Default.m  
**Comment**

**Sample Group**  
**Stream Name** LC 1 **Info.**  
**Acquisition SW** 6400 Series Triple  
**Version** Quadrupole 10.0 (127)

## User Chromatograms

**Fragmentor Voltage** 135 **Collision Energy** 0 **Ionization Mode** ESI

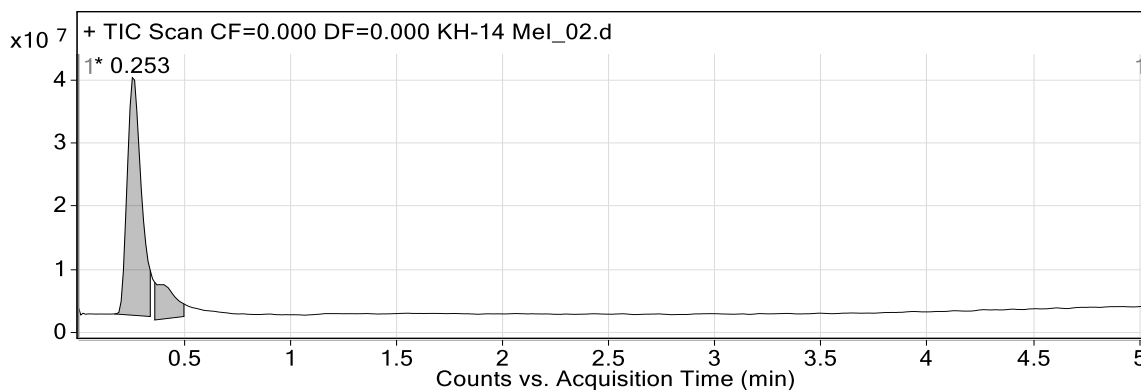

### Integration Peak List

| Peak | Start | RT    | End   | Height   | Area      | Area % |
|------|-------|-------|-------|----------|-----------|--------|
| 1    | 0,169 | 0,253 | 0,338 | 37608860 | 176184297 | 100    |
| 2    | 0,359 | 0,359 | 0,497 | 5942944  | 33679653  | 19,12  |

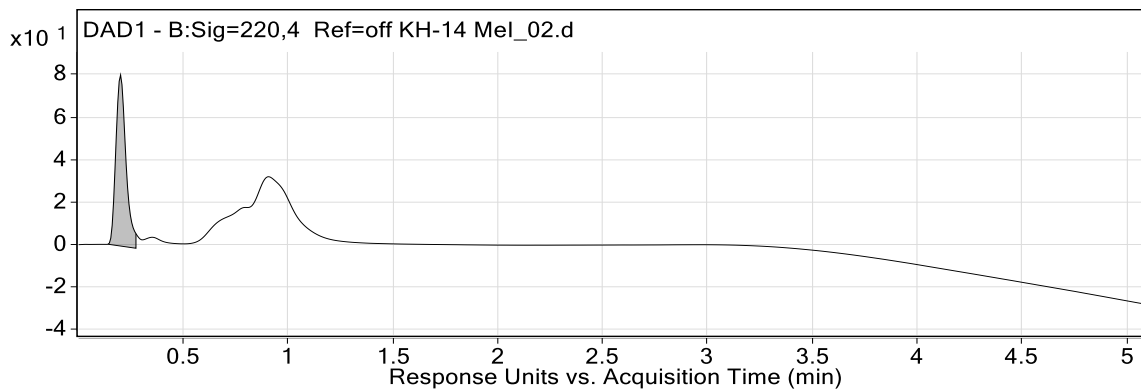

### Integration Peak List

| Peak | Start | RT    | End   | Height | Area   | Area % |
|------|-------|-------|-------|--------|--------|--------|
| 1    | 0,142 | 0,202 | 0,276 | 80,44  | 270,81 | 100    |

## User Spectra

**Spectrum Source** Peak (1) in "+ TIC Scan" **Fragmentor Voltage** 135 **Collision Energy** 0 **Ionization Mode** ESI



# Qualitative Analysis Report

2e

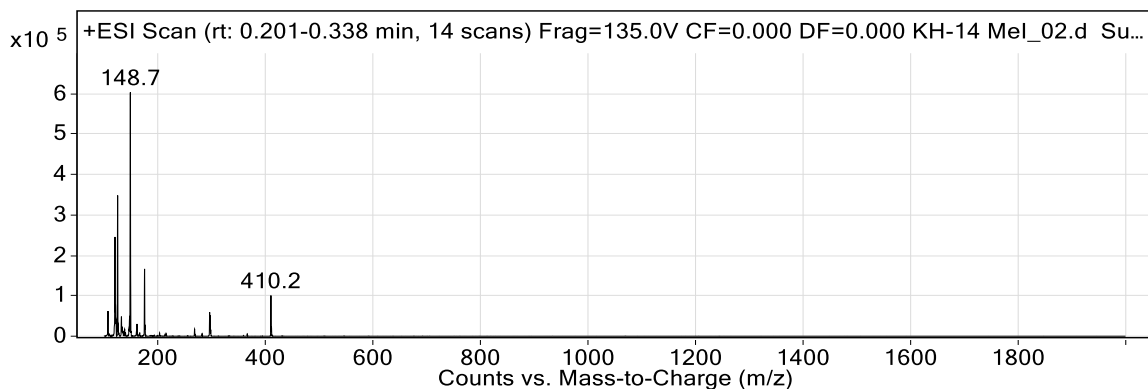

## Peak List

| m/z   | z | Abund     |
|-------|---|-----------|
| 107.1 |   | 62145.61  |
| 120.1 |   | 245466.17 |
| 121.1 |   | 78604.02  |
| 125.1 |   | 348038.06 |
| 132.1 |   | 48494.52  |
| 148.7 | 2 | 603012.88 |
| 175.2 |   | 166433.56 |
| 296.2 |   | 59401.49  |
| 297.3 |   | 50998.73  |
| 410.2 |   | 100753.29 |

## Spectrum Source

Peak (2) in "+ TIC Scan"

## Fragmentor Voltage

135

## Collision Energy

0

## Ionization Mode

ESI

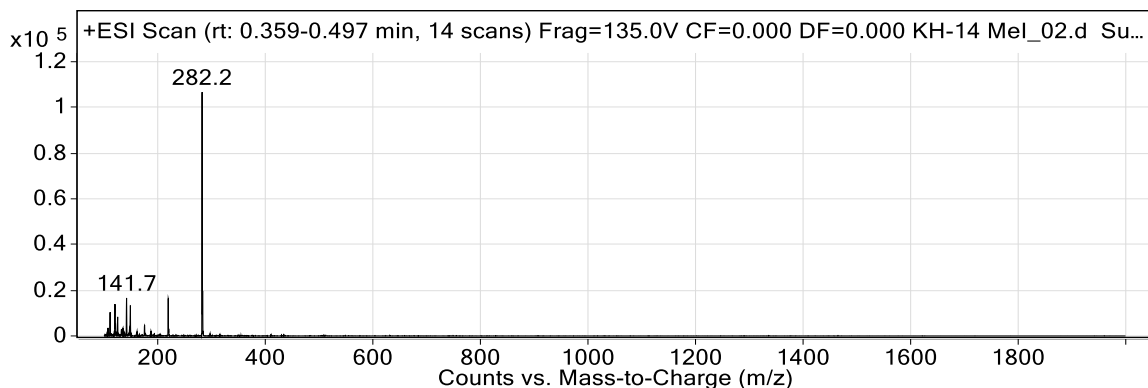

## Peak List

| m/z   | z | Abund     |
|-------|---|-----------|
| 111   |   | 10374.39  |
| 120.1 |   | 13932.16  |
| 121.1 |   | 5476.77   |
| 125.1 |   | 8341.93   |
| 141.7 | 2 | 16616.88  |
| 148.7 | 2 | 13239.06  |
| 219.1 |   | 16406.04  |
| 282.2 | 1 | 106663.66 |
| 283.2 | 1 | 19729.4   |

## Spectrum Source

Peak (1) in "DAD1 - B:Sig=220,4 Ref=off"

# Qualitative Analysis Report

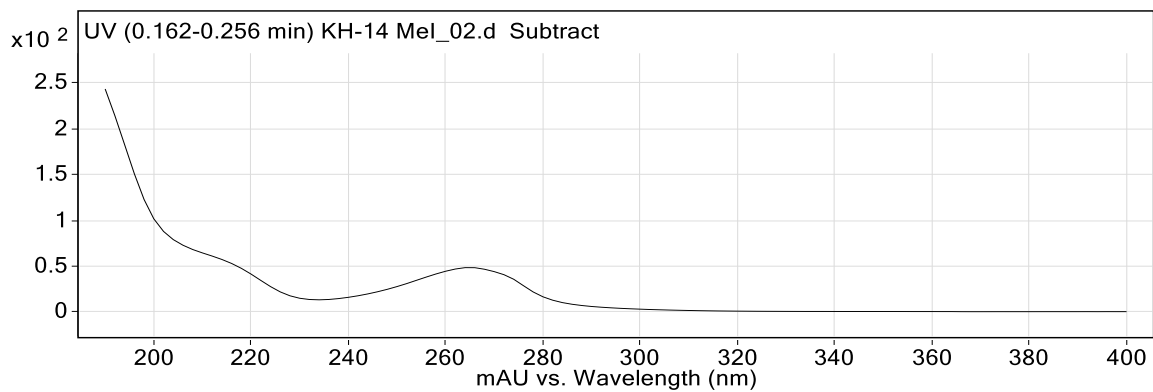

2e

--- End Of Report ---

# Qualitative Analysis Report

3a

|                               |                    |                      |                           |
|-------------------------------|--------------------|----------------------|---------------------------|
| <b>Data Filename</b>          | KH-4_01.d          | <b>Sample Name</b>   | KH-4                      |
| <b>Sample Type</b>            | Sample             | <b>Position</b>      | Vial 2                    |
| <b>Instrument Name</b>        | Instrument 1       | <b>User Name</b>     |                           |
| <b>Acq Method</b>             | All_2021_kol 1-6.m | <b>Acquired Time</b> | 7/7/2021 11:16:21 AM      |
| <b>IRM Calibration Status</b> | Not Applicable     | <b>DA Method</b>     | ChromPeakSurvey-Default.m |
| <b>Comment</b>                |                    |                      |                           |

|                     |      |                       |                       |
|---------------------|------|-----------------------|-----------------------|
| <b>Sample Group</b> |      | <b>Info.</b>          |                       |
| <b>Stream Name</b>  | LC 1 | <b>Acquisition SW</b> | 6400 Series Triple    |
|                     |      | <b>Version</b>        | Quadrupole 10.0 (127) |

## User Chromatograms

Fragmentor Voltage 135 Collision Energy 0 Ionization Mode ESI

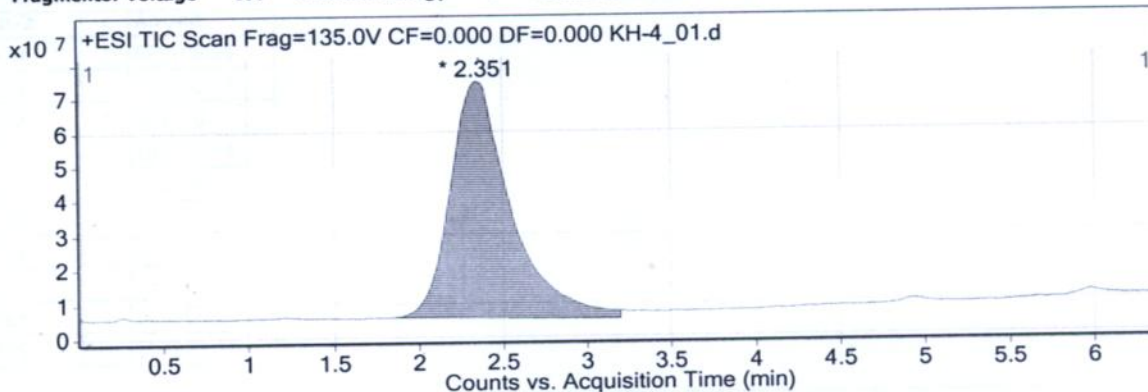

## Integration Peak List

| Peak | Start | RT    | End   | Height   | Area       | Area % |
|------|-------|-------|-------|----------|------------|--------|
| 1    | 1,851 | 2,351 | 3,194 | 69205467 | 1716905206 | 100    |

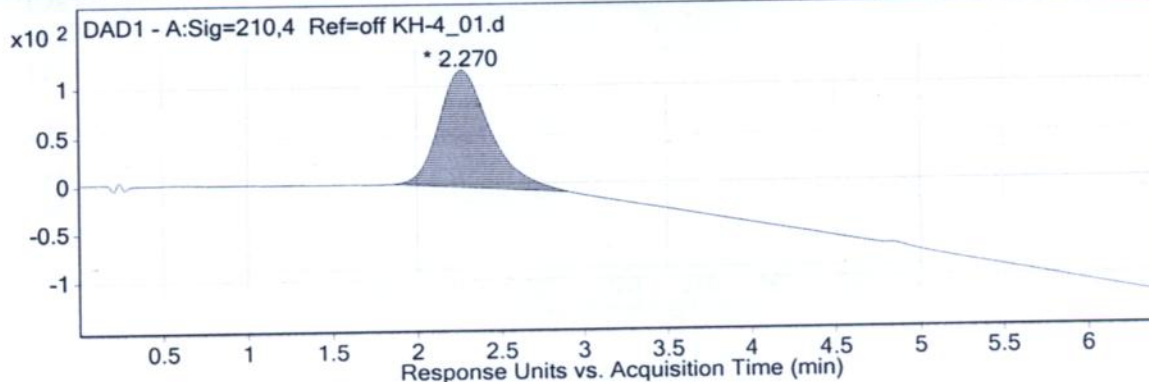

## Integration Peak List

| Peak | Start | RT   | End   | Height | Area    | Area % |
|------|-------|------|-------|--------|---------|--------|
| 1    | 1,877 | 2,27 | 2,904 | 121,22 | 2578,78 | 100    |

## User Spectra

|                          |                           |                         |                        |
|--------------------------|---------------------------|-------------------------|------------------------|
| <b>Spectrum Source</b>   | <b>Fragmentor Voltage</b> | <b>Collision Energy</b> | <b>Ionization Mode</b> |
| Peak (1) in "+ TIC Scan" | 135                       | 0                       | ESI                    |

# Qualitative Analysis Report

3a

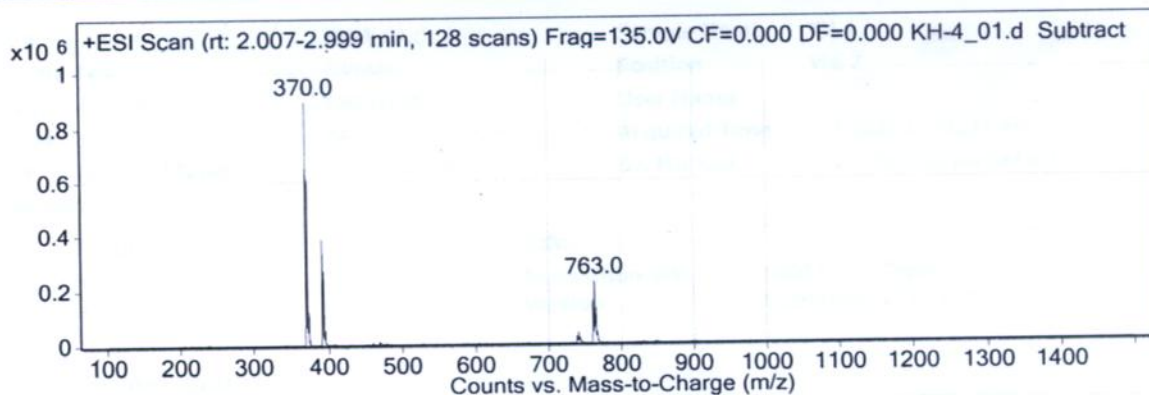

## Peak List

| m/z | z | Abund     |
|-----|---|-----------|
| 370 | 1 | 896106.25 |
| 371 | 1 | 148190.73 |
| 372 | 1 | 609470.75 |
| 373 | 1 | 103675.24 |
| 374 | 1 | 118506.73 |
| 392 | 1 | 386740.41 |
| 394 | 1 | 270099.34 |
| 761 |   | 154753.8  |
| 763 | 1 | 224958.2  |
| 765 | 1 | 127922.04 |

## Spectrum Source

Peak (1) in "DAD1 - A:Sig=210,4 Ref=off"

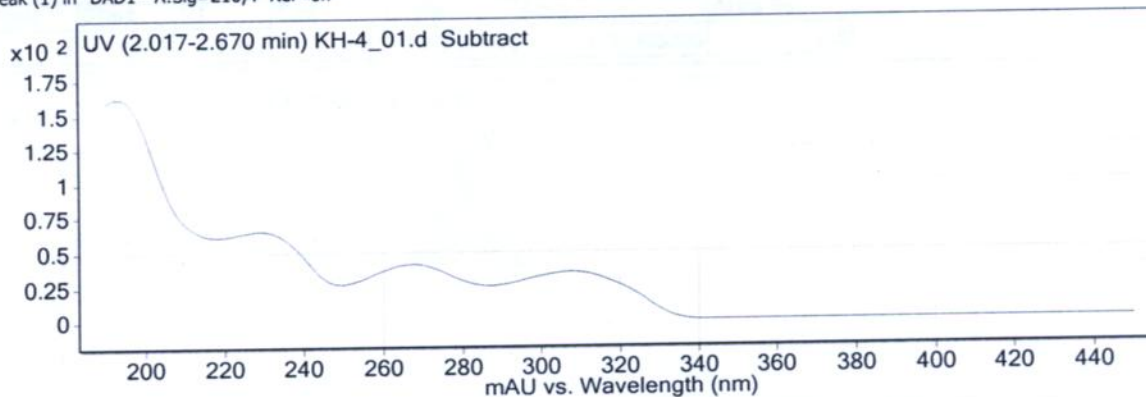

--- End Of Report ---

# Qualitative Analysis Report

3b

Data Filename KH-6\_01.d Sample Name KH-6  
Sample Type Sample Position Vial 2  
Instrument Name Instrument 1 User Name  
Acq Method All\_2021\_kol 1-6.m Acquired Time 7/7/2021 11:39:16 AM  
IRM Calibration Status Not Applicable DA Method ChromPeakSurvey-Default.m  
Comment

Sample Group Info.  
Stream Name LC 1 Acquisition SW 6400 Series Triple  
Version Quadrupole 10.0 (127)

## User Chromatograms

Fragmentor Voltage 135 Collision Energy 0 Ionization Mode ESI

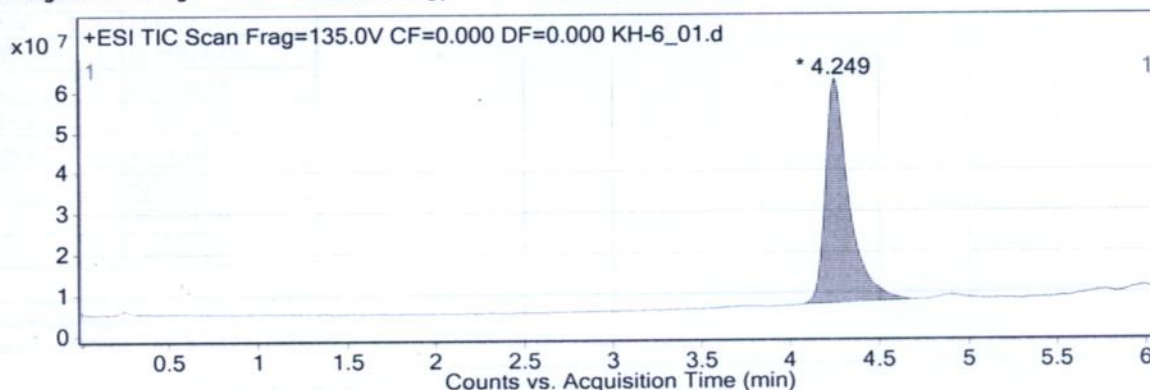

## Integration Peak List

| Peak | Start | RT    | End   | Height   | Area      | Area % |
|------|-------|-------|-------|----------|-----------|--------|
| 1    | 4,077 | 4,249 | 4,694 | 55170028 | 503867286 | 100    |

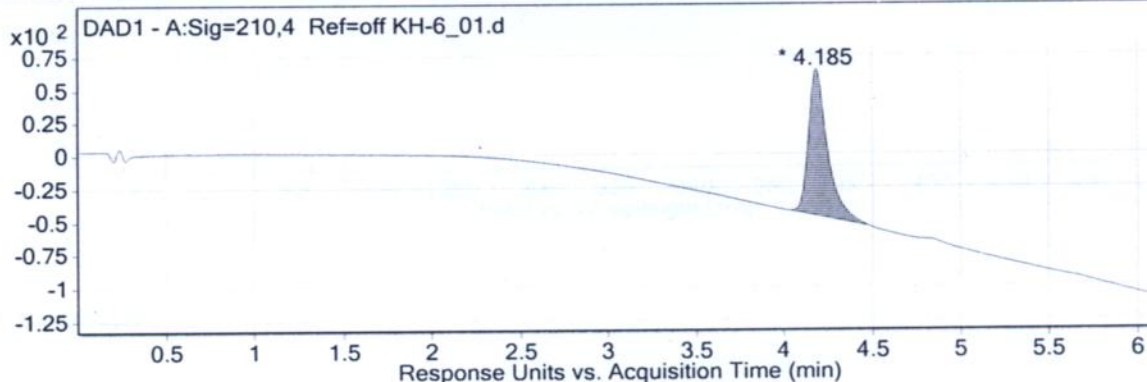

## Integration Peak List

| Peak | Start | RT    | End   | Height | Area   | Area % |
|------|-------|-------|-------|--------|--------|--------|
| 1    | 4,045 | 4,185 | 4,471 | 111,12 | 819,41 | 100    |

## User Spectra

Spectrum Source Peak (1) in "+ TIC Scan" Fragmentor Voltage 135 Collision Energy 0 Ionization Mode ESI



# Qualitative Analysis Report

3b

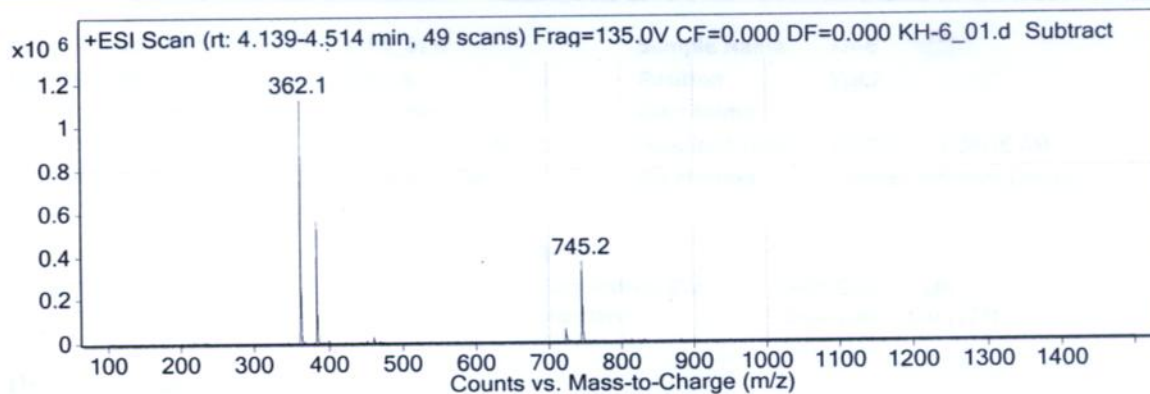

## Peak List

| m/z   | z | Abund      |
|-------|---|------------|
| 362.1 | 1 | 1124933.25 |
| 363.1 | 1 | 237955.14  |
| 384.1 | 1 | 564864.88  |
| 385.1 | 1 | 130870.91  |
| 723.3 |   | 59793.97   |
| 745.2 | 1 | 367083.19  |
| 746.2 | 1 | 166852.56  |

## Spectrum Source

Peak (1) in "DAD1 - A:Sig=210,4 Ref=off"

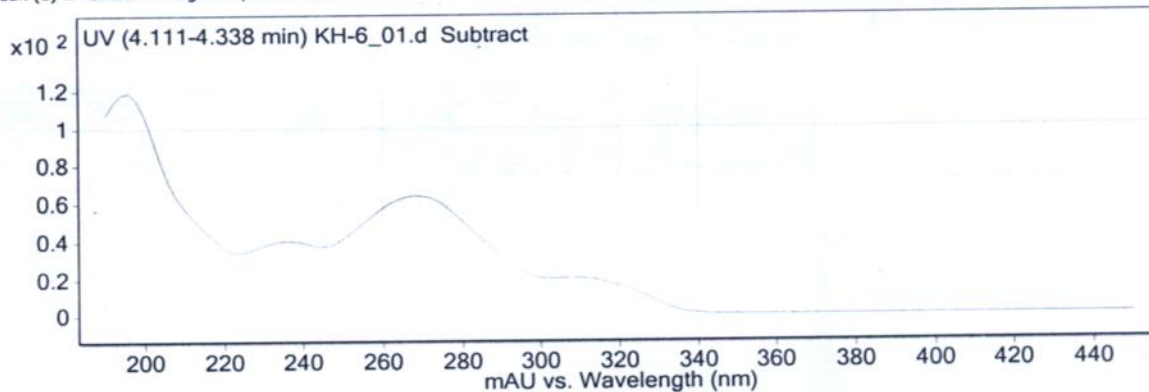

--- End Of Report ---

# Qualitative Analysis Report

**Data Filename** KH-5\_01.d **Sample Name** KH-5 **3c**  
**Sample Type** Sample **Position** Vial 2  
**Instrument Name** Instrument 1 **User Name**  
**Acq Method** All\_2021\_kol 1-6.m **Acquired Time** 7/7/2021 11:27:00 AM  
**IRM Calibration Status** Not Applicable **DA Method** ChromPeakSurvey-Default.m  
**Comment**

**Sample Group**  
**Stream Name** LC 1 **Info.**  
**Acquisition SW** 6400 Series Triple  
**Version** Quadrupole 10.0 (127)

## User Chromatograms

Fragmentor Voltage 135 Collision Energy 0 Ionization Mode ESI

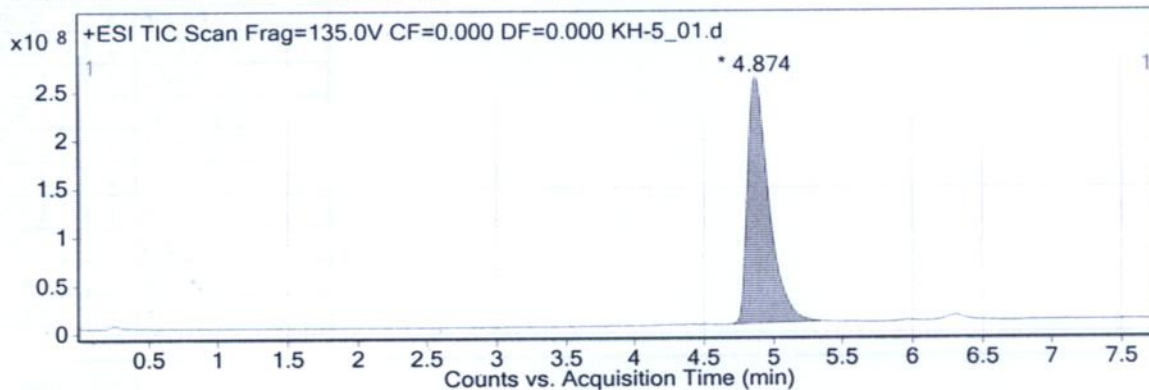

### Integration Peak List

| Peak | Start | RT    | End  | Height    | Area       | Area % |
|------|-------|-------|------|-----------|------------|--------|
| 1    | 4,702 | 4,874 | 5,35 | 254886638 | 2721539730 | 100    |

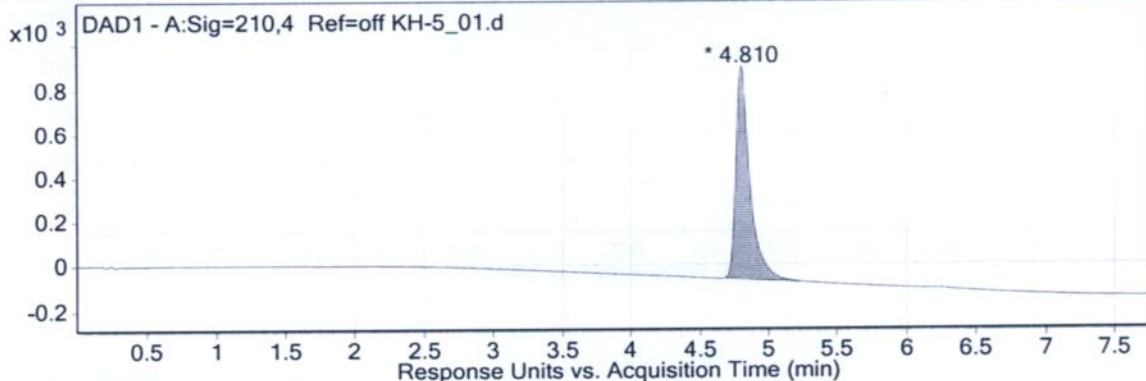

### Integration Peak List

| Peak | Start | RT   | End  | Height | Area    | Area % |
|------|-------|------|------|--------|---------|--------|
| 1    | 4,683 | 4,81 | 5,23 | 961,45 | 6805,64 | 100    |

## User Spectra

**Spectrum Source** Peak (1) in "+ TIC Scan" **Fragmentor Voltage** 135 **Collision Energy** 0 **Ionization Mode** ESI

# Qualitative Analysis Report

3c

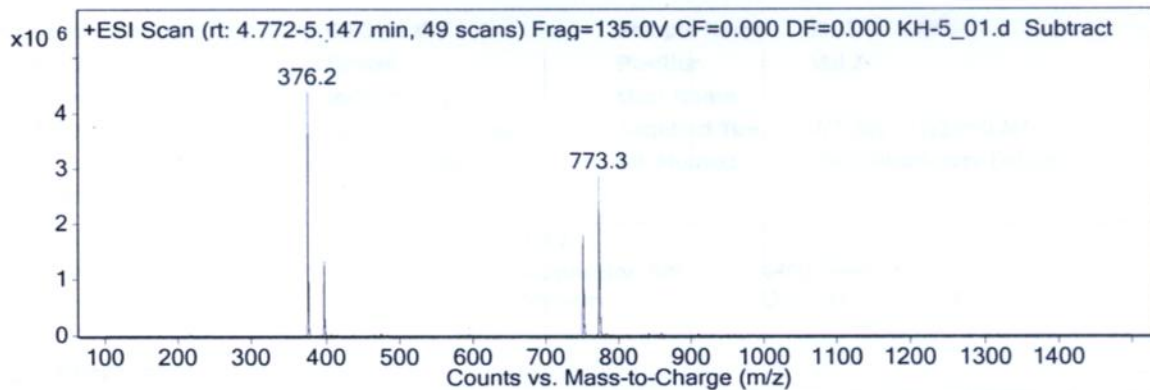

## Peak List

| m/z   | z | Abund      |
|-------|---|------------|
| 376.2 | 1 | 4403386.5  |
| 377.2 | 1 | 969849.31  |
| 398.1 | 1 | 1339133.63 |
| 399.1 | 1 | 303984.28  |
| 751.3 | 1 | 1798671.63 |
| 752.3 | 1 | 817681.63  |
| 773.3 | 1 | 2867851.75 |
| 774.3 | 1 | 1301444.75 |
| 775.3 | 1 | 324454.59  |

## Spectrum Source

Peak (1) in "DAD1 - A:Sig=210,4 Ref=off"

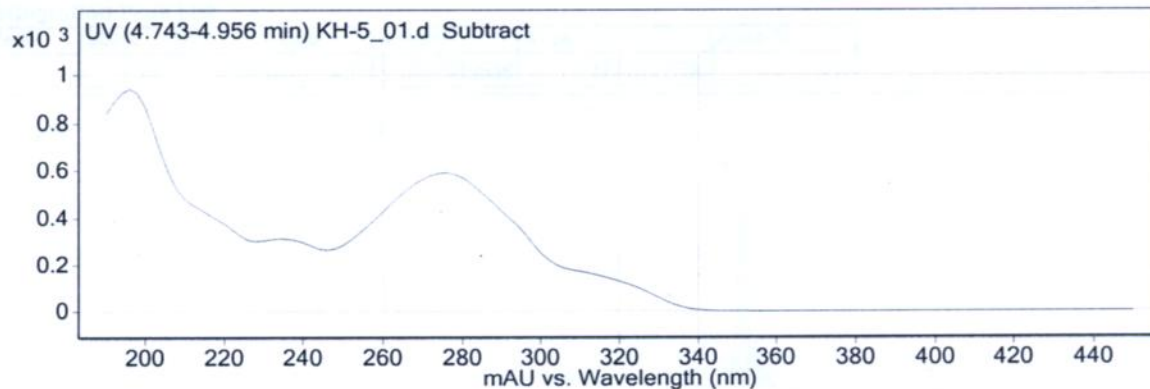

--- End Of Report ---

Qualitative Analysis Report

3f

Data Filename

KH-9\_01.d

Sample Name

KH-9

Sample Type

Sample

Position

Vial 2

Instrument Name

Instrument 1

User Name

Acq Method

All\_2021\_kol 1-6.m

Acquired Time

7/7/2021 12:20:00 PM

IRM Calibration Status

Not Applicable

DA Method

ChromPeakSurvey-Default.m

Comment

Sample Group

Stream Name

LC 1

Info.

Acquisition SW

Version

6400 Series Triple  
Quadrupole 10.0 (127)

User Chromatograms

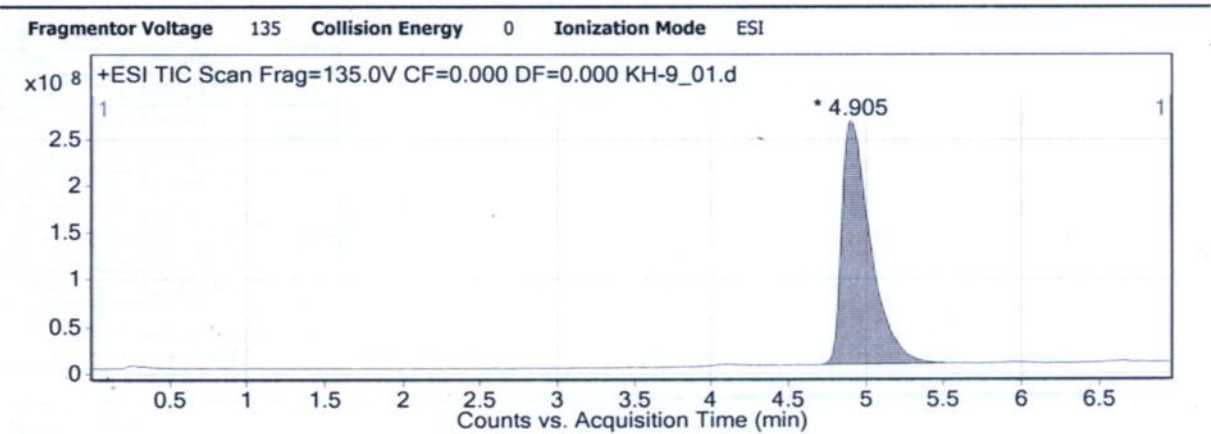

Integration Peak List

| Peak | Start | RT    | End   | Height    | Area       | Area % |
|------|-------|-------|-------|-----------|------------|--------|
| 1    | 4,717 | 4,905 | 5,537 | 259456426 | 3335376360 | 100    |

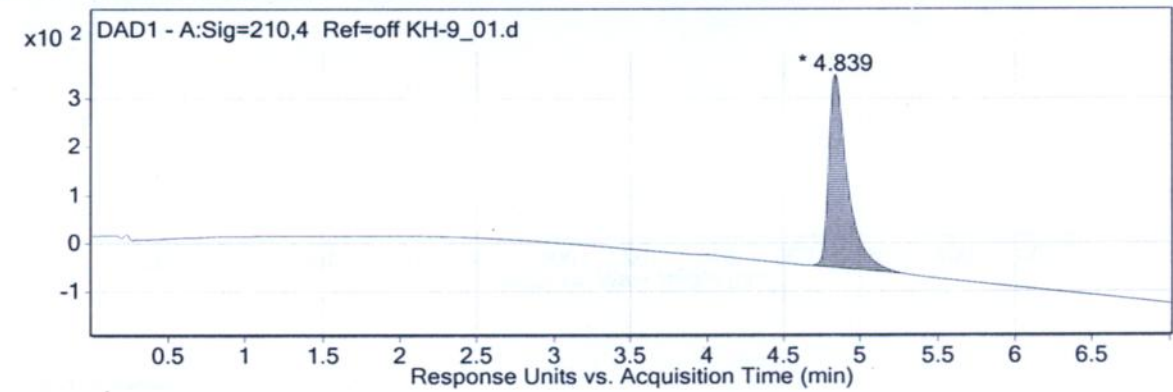

Integration Peak List

| Peak | Start | RT    | End   | Height | Area    | Area % |
|------|-------|-------|-------|--------|---------|--------|
| 1    | 4,679 | 4,839 | 5,272 | 399,32 | 3392,55 | 100    |

User Spectra

Spectrum Source

Peak (1) in "+ TIC Scan"

Fragmentor Voltage

135

Collision Energy

0

Ionization Mode

ESI



# Qualitative Analysis Report

3f

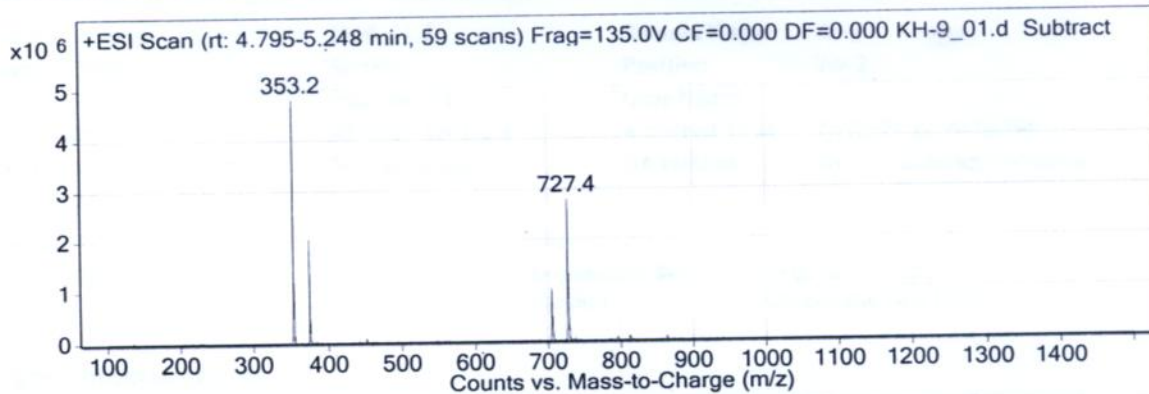

## Peak List

| m/z   | z | Abund      |
|-------|---|------------|
| 353.2 | 1 | 4806573    |
| 354.2 | 1 | 1197329.5  |
| 375.2 | 1 | 2040541    |
| 376.2 | 1 | 449387.5   |
| 705.4 | 1 | 1023337.25 |
| 706.4 | 1 | 467385.91  |
| 727.4 | 1 | 2790041.25 |
| 728.4 | 1 | 1322313.88 |
| 729.4 | 1 | 298360.22  |

## Spectrum Source

Peak (1) in "DAD1 - A:Sig=210,4 Ref=off"

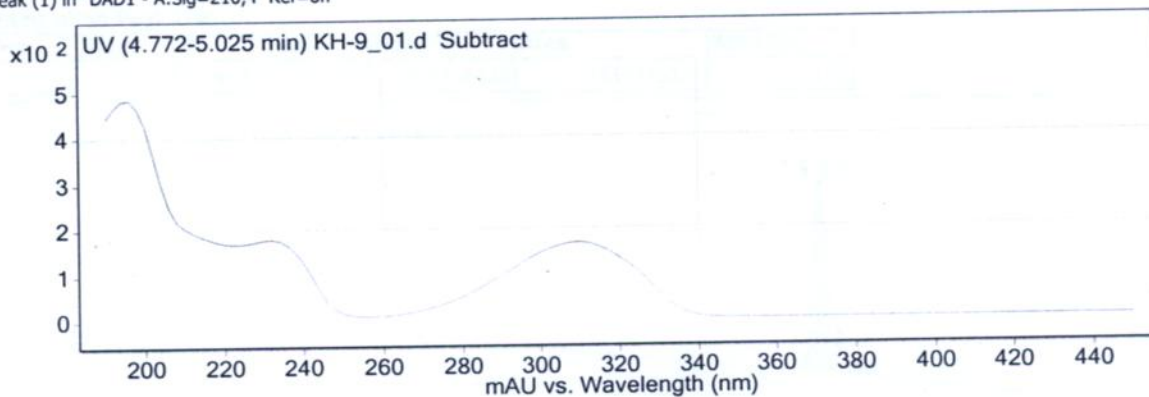

--- End Of Report ---
