# Supplementary figures and images for: Synthesis and Biological Activity of N-acyl Anabasine and Cytisine Derivatives With Adamantane, Pyridine and 1,2-azole Fragments
Source: Preprints.org preprint supplement (doi:10.20944/preprints202210.0368.v1), 2022-10-24

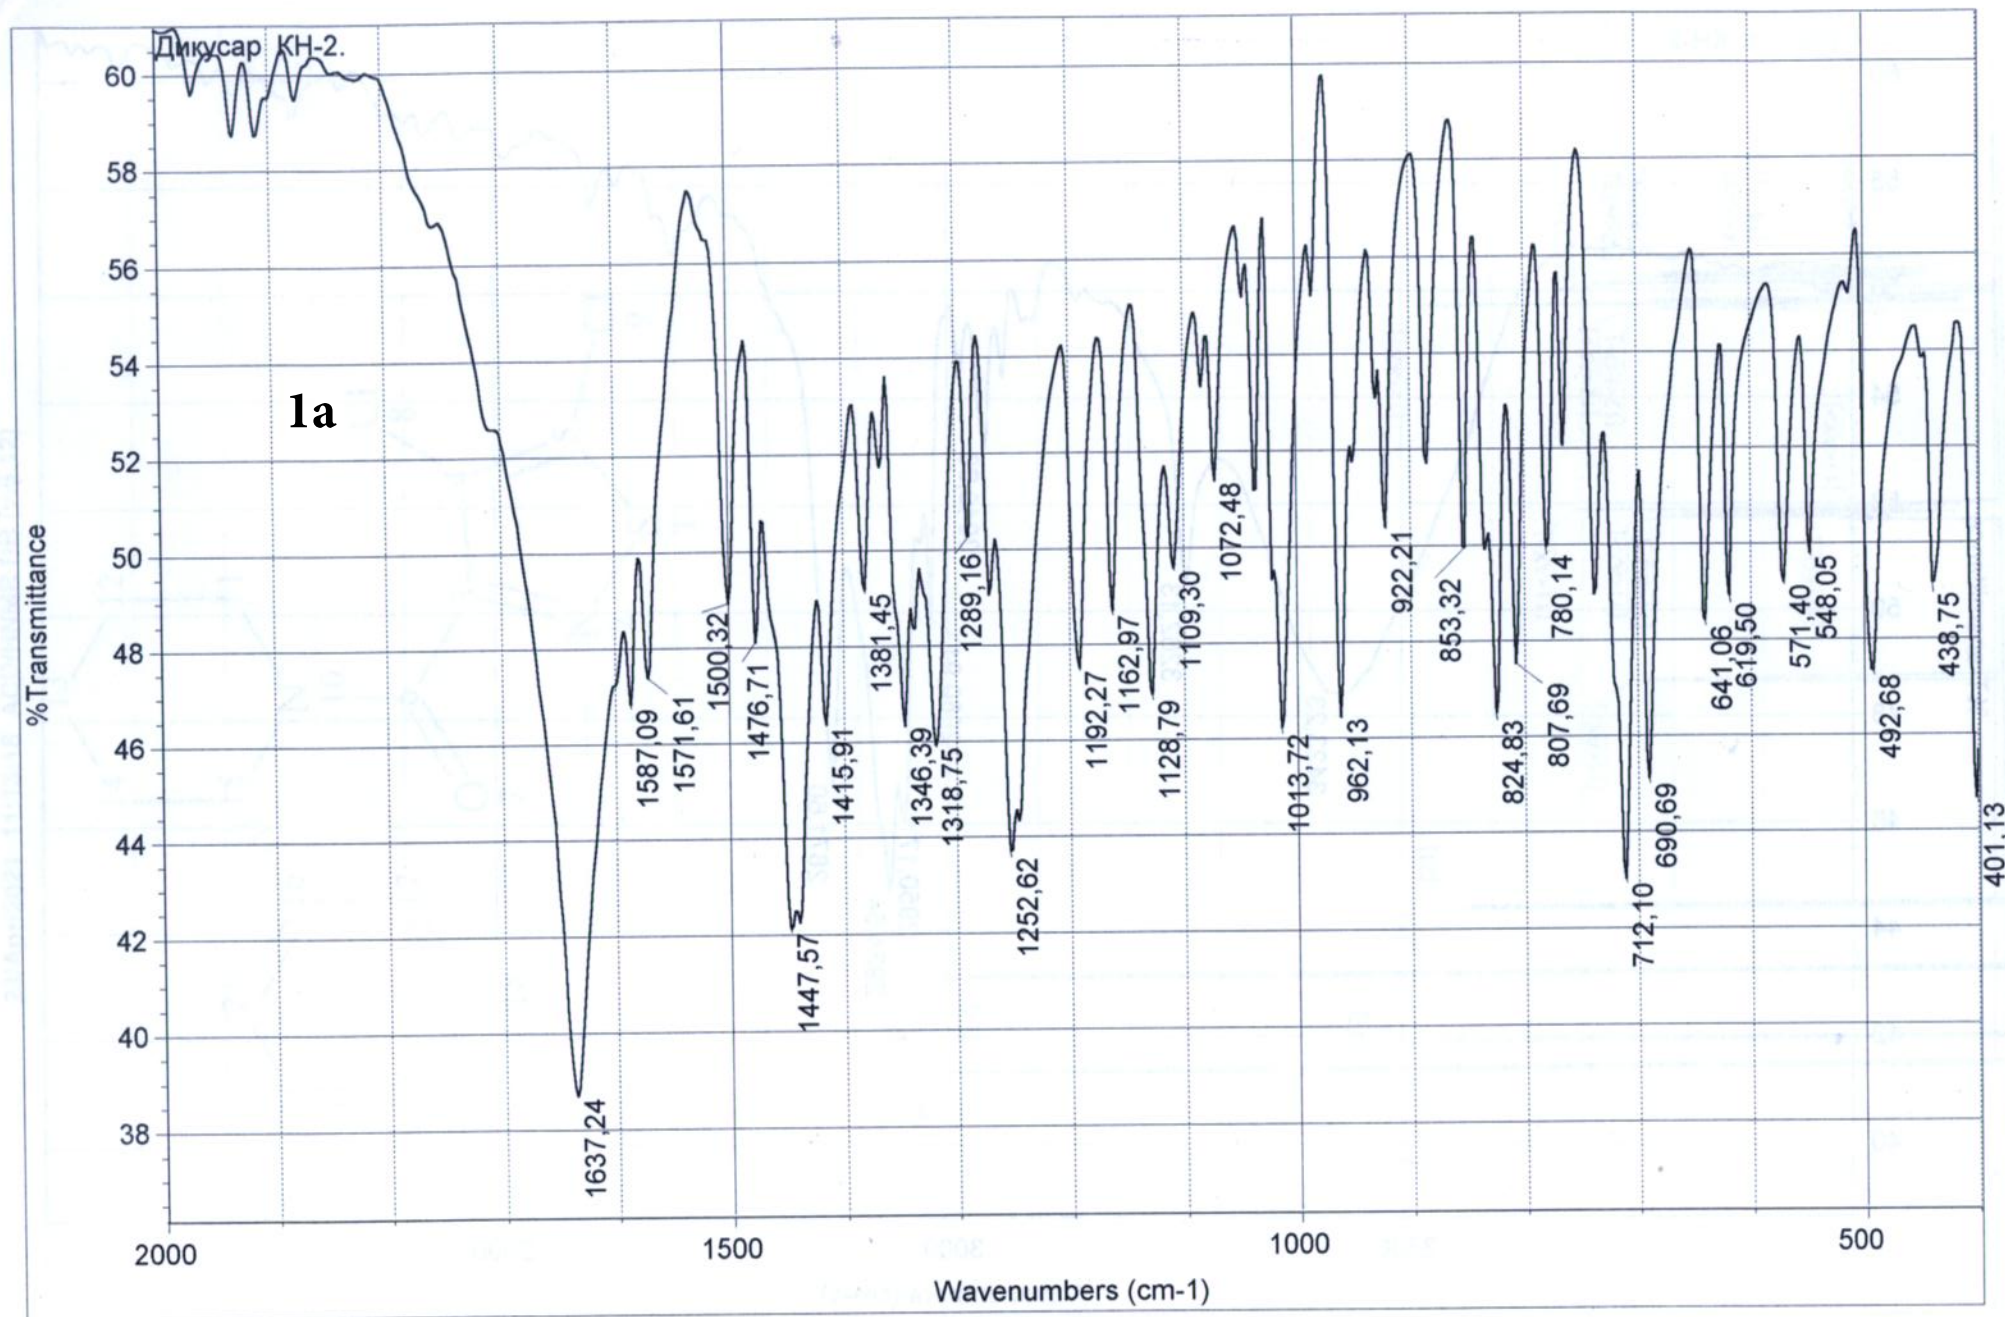

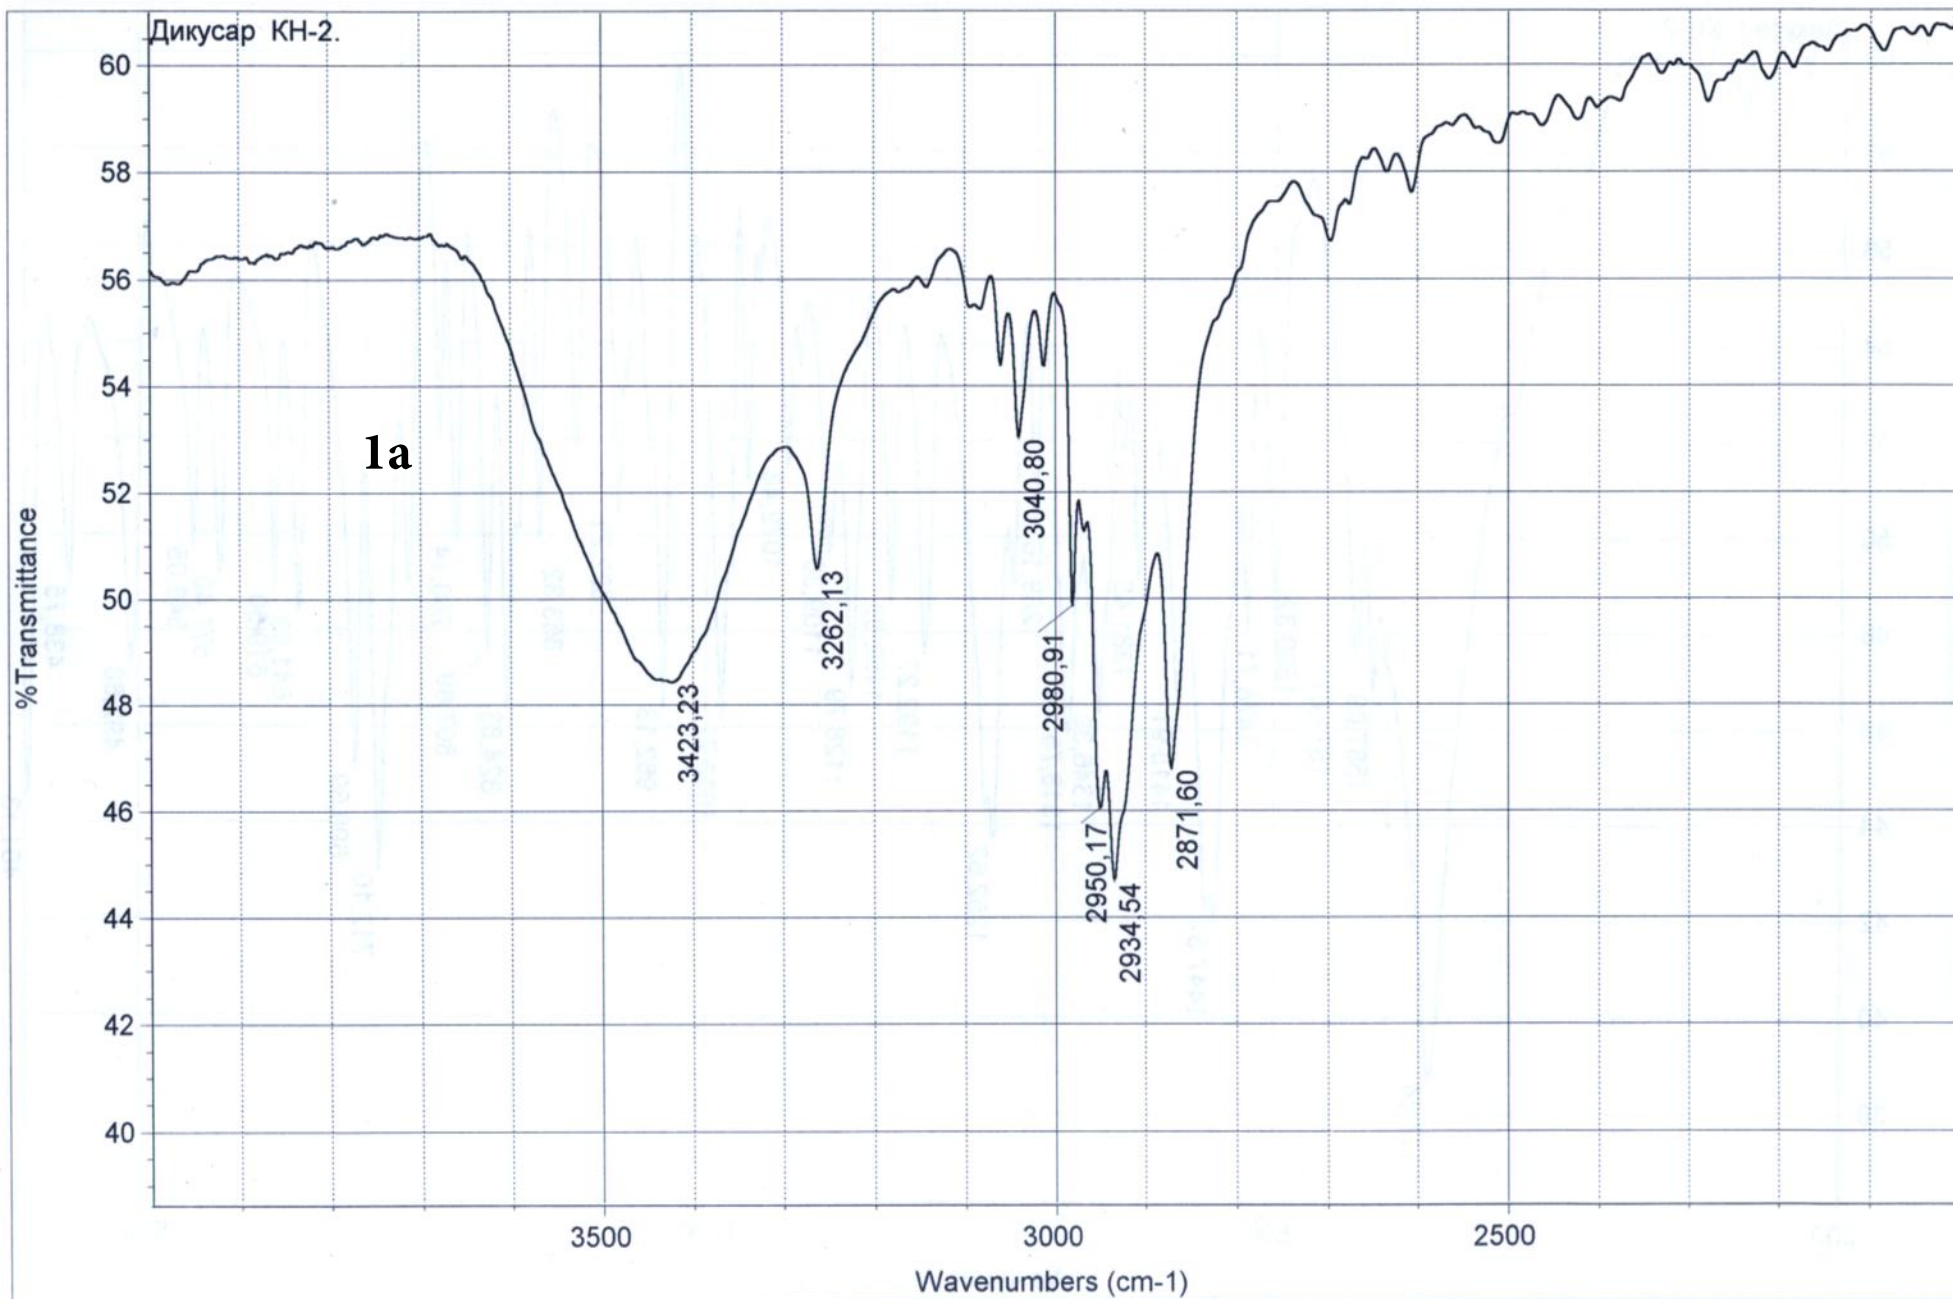



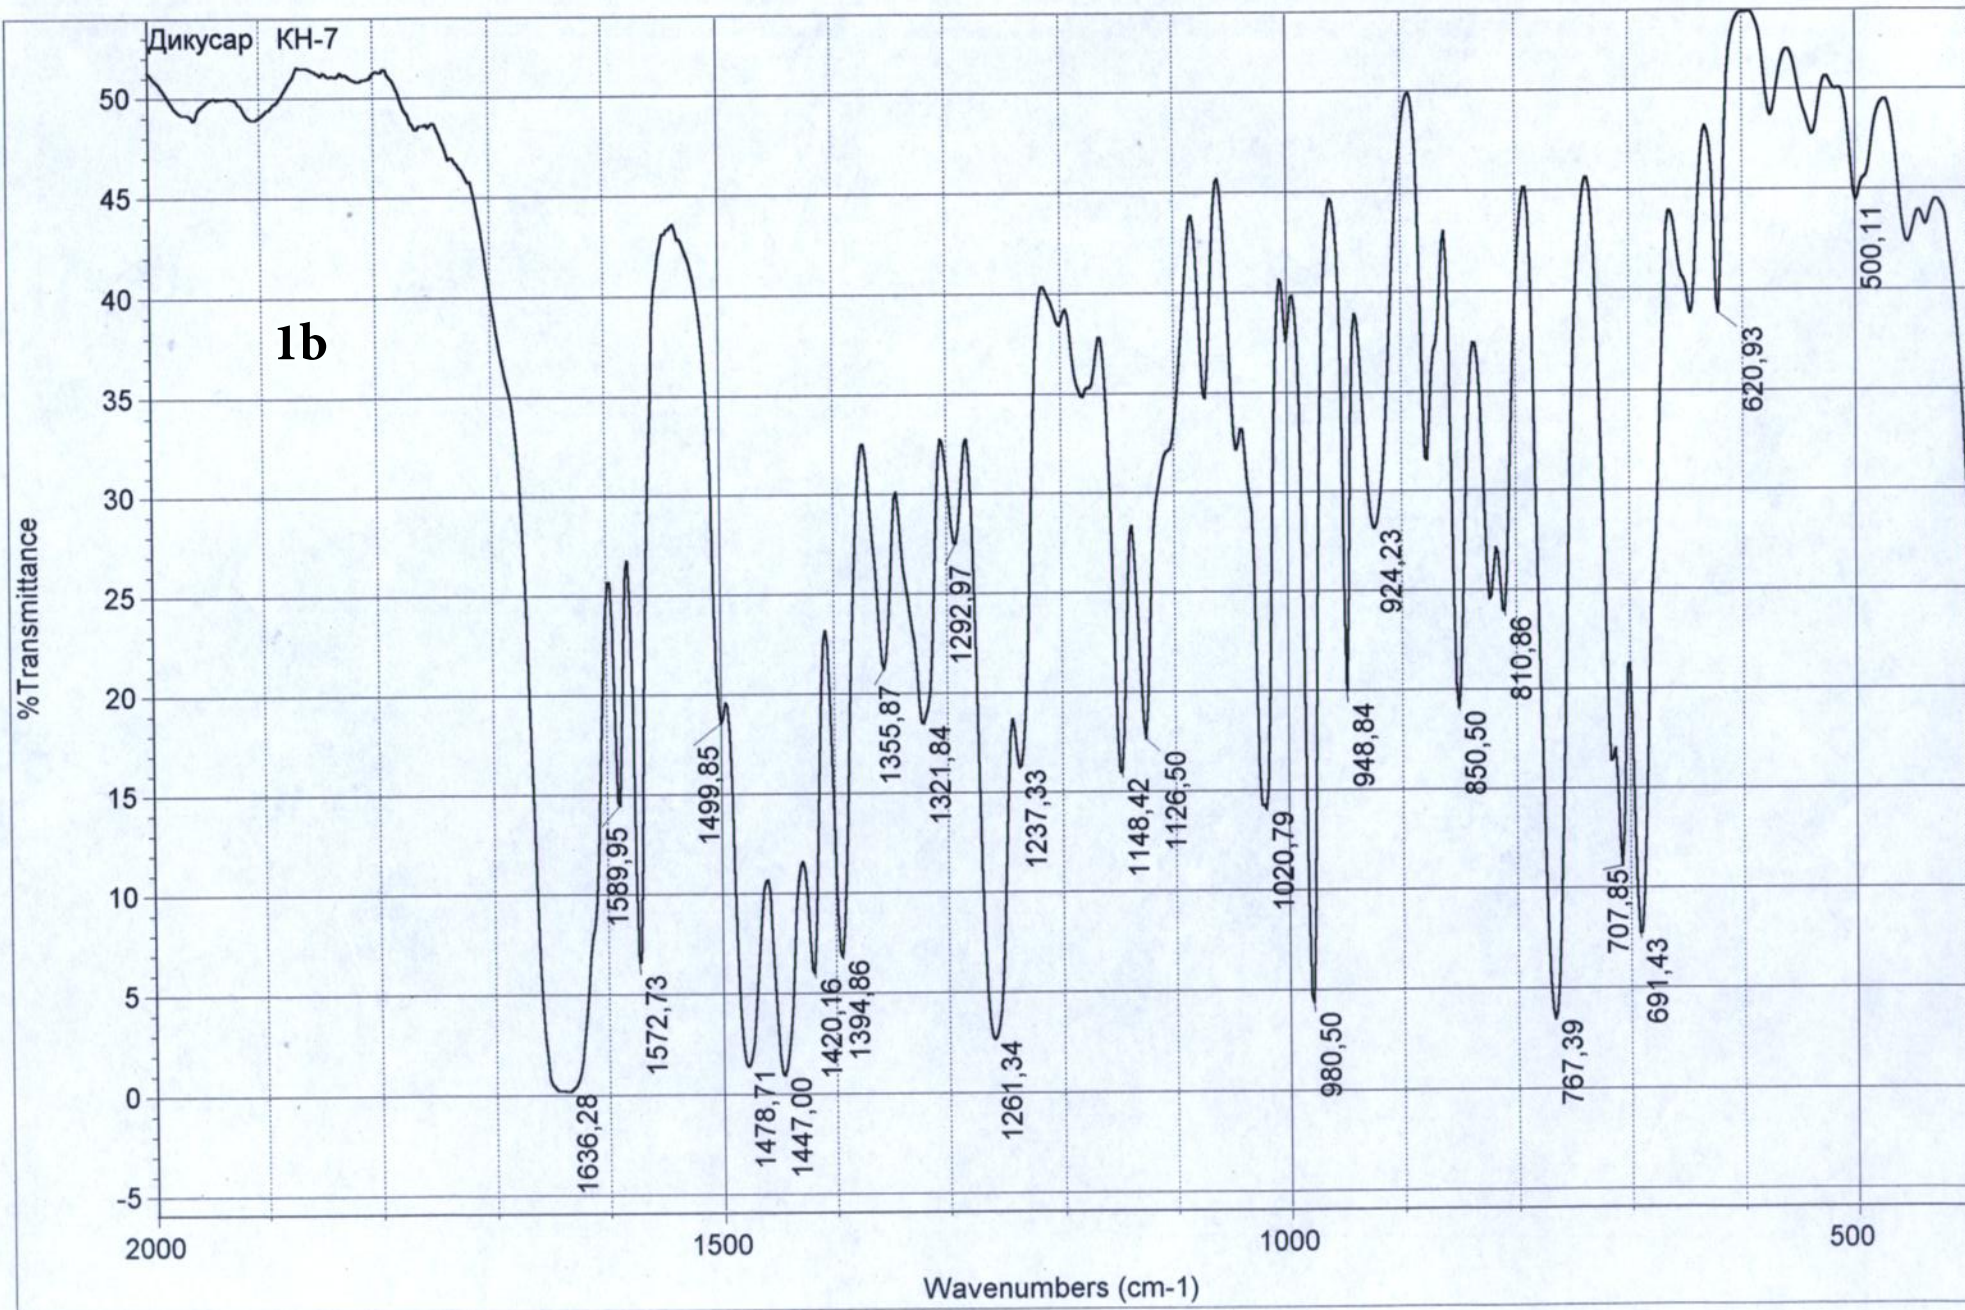



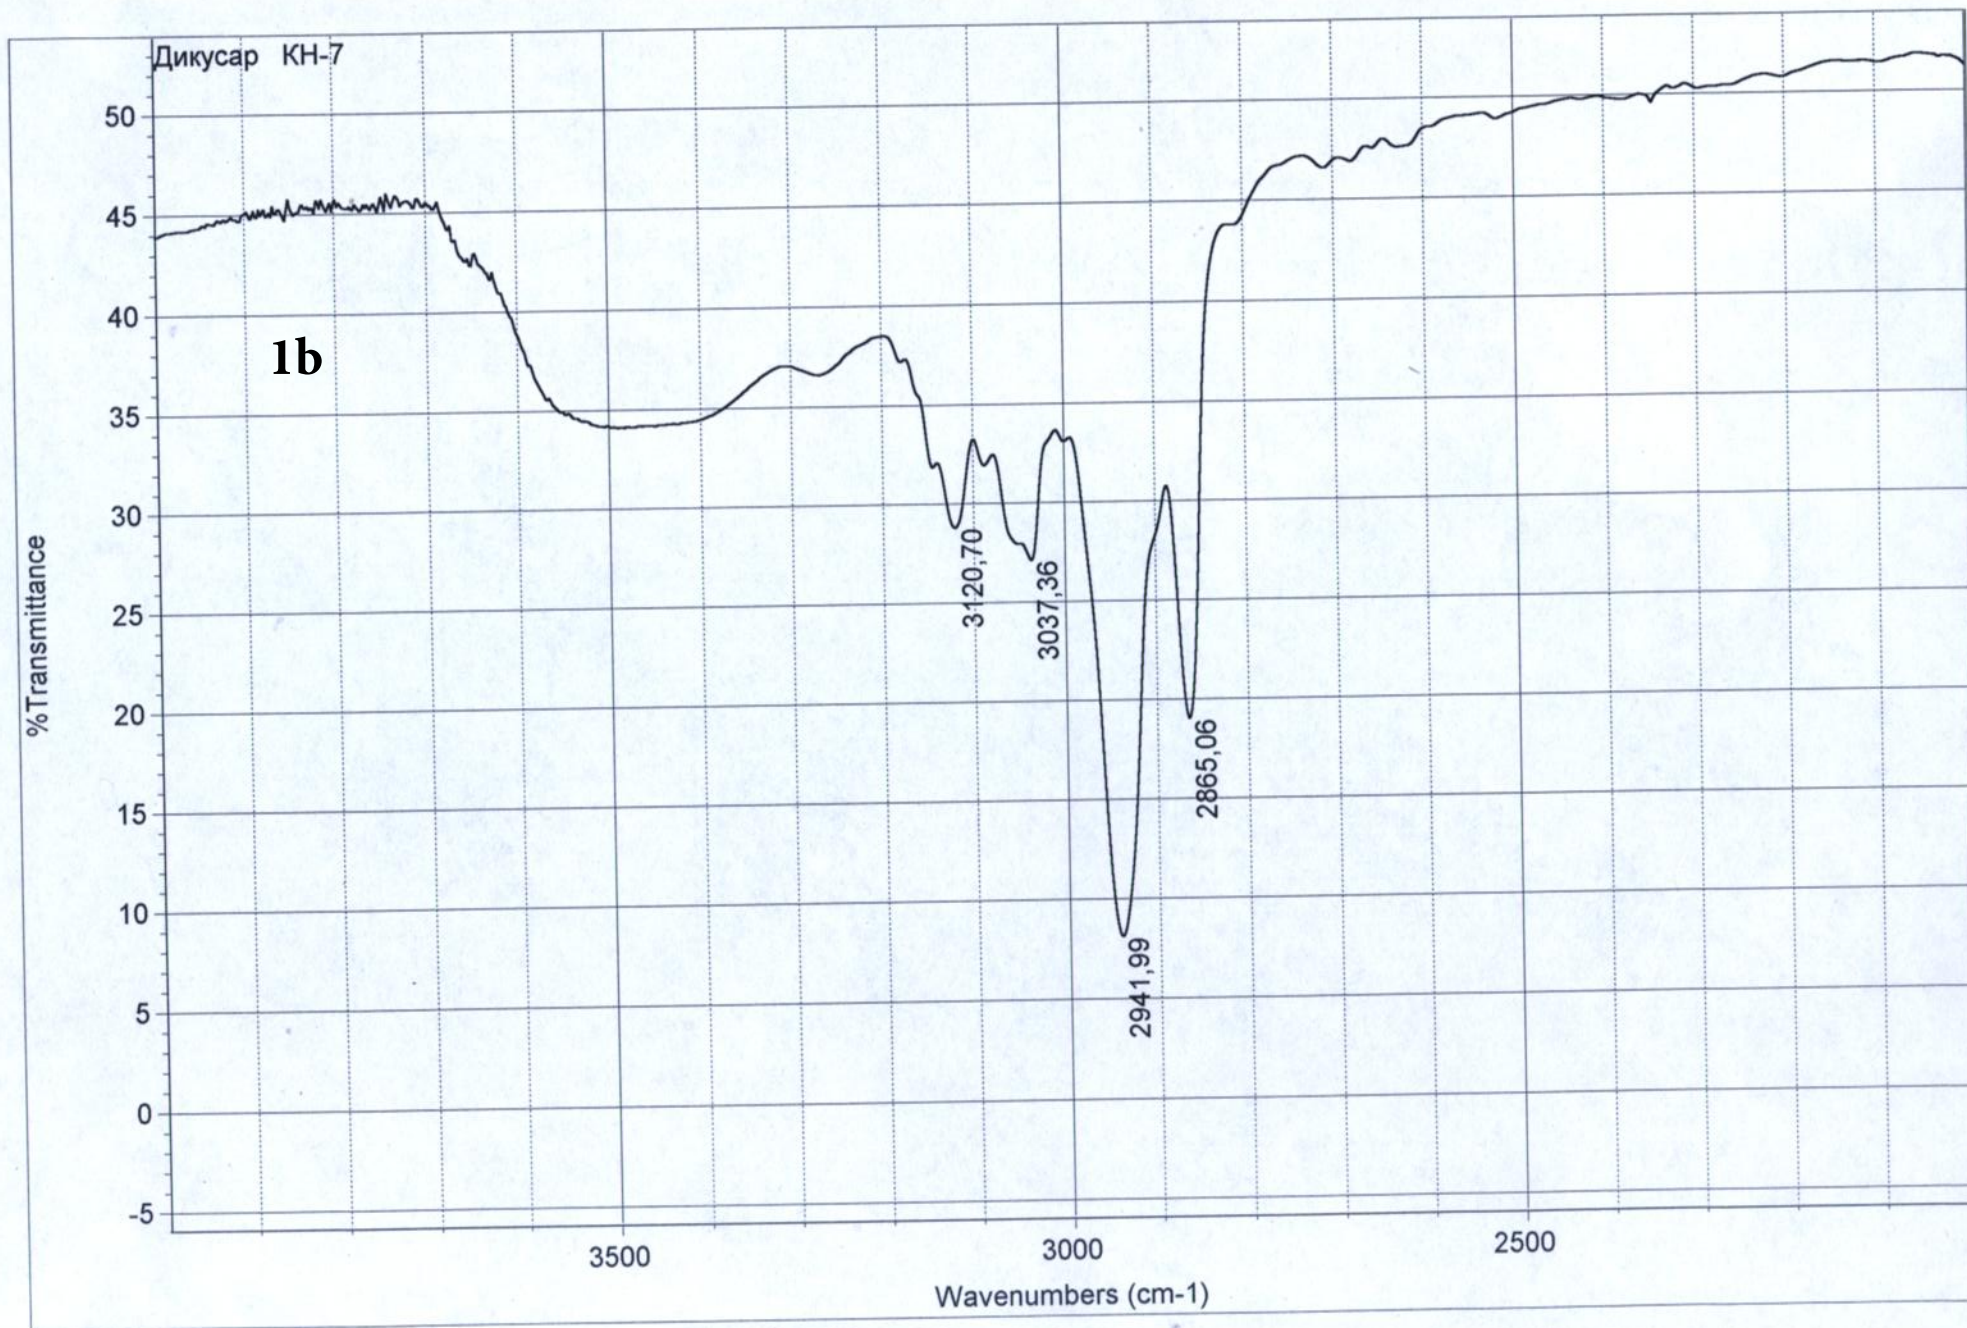



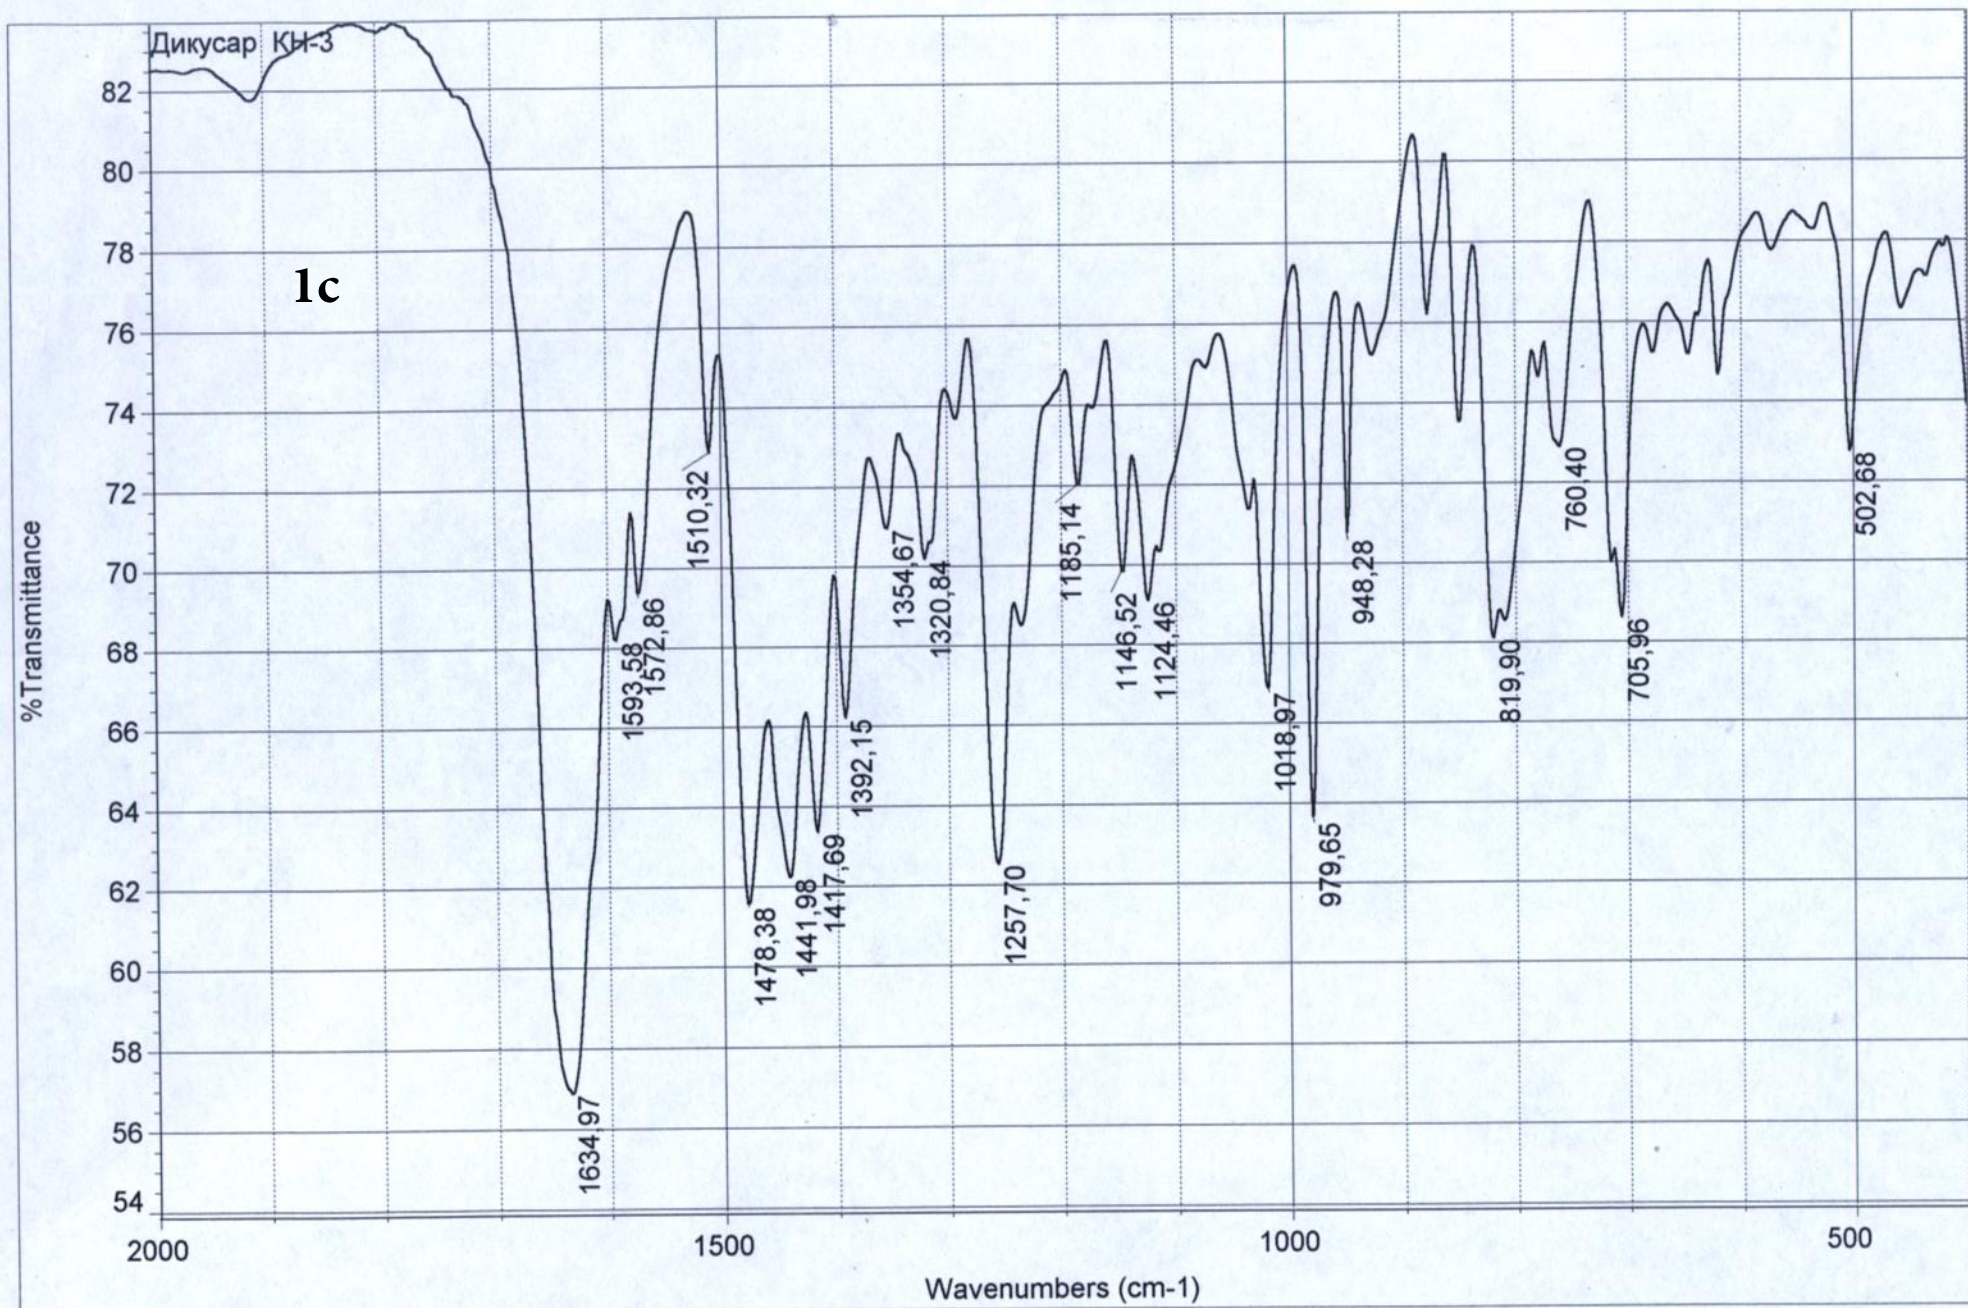



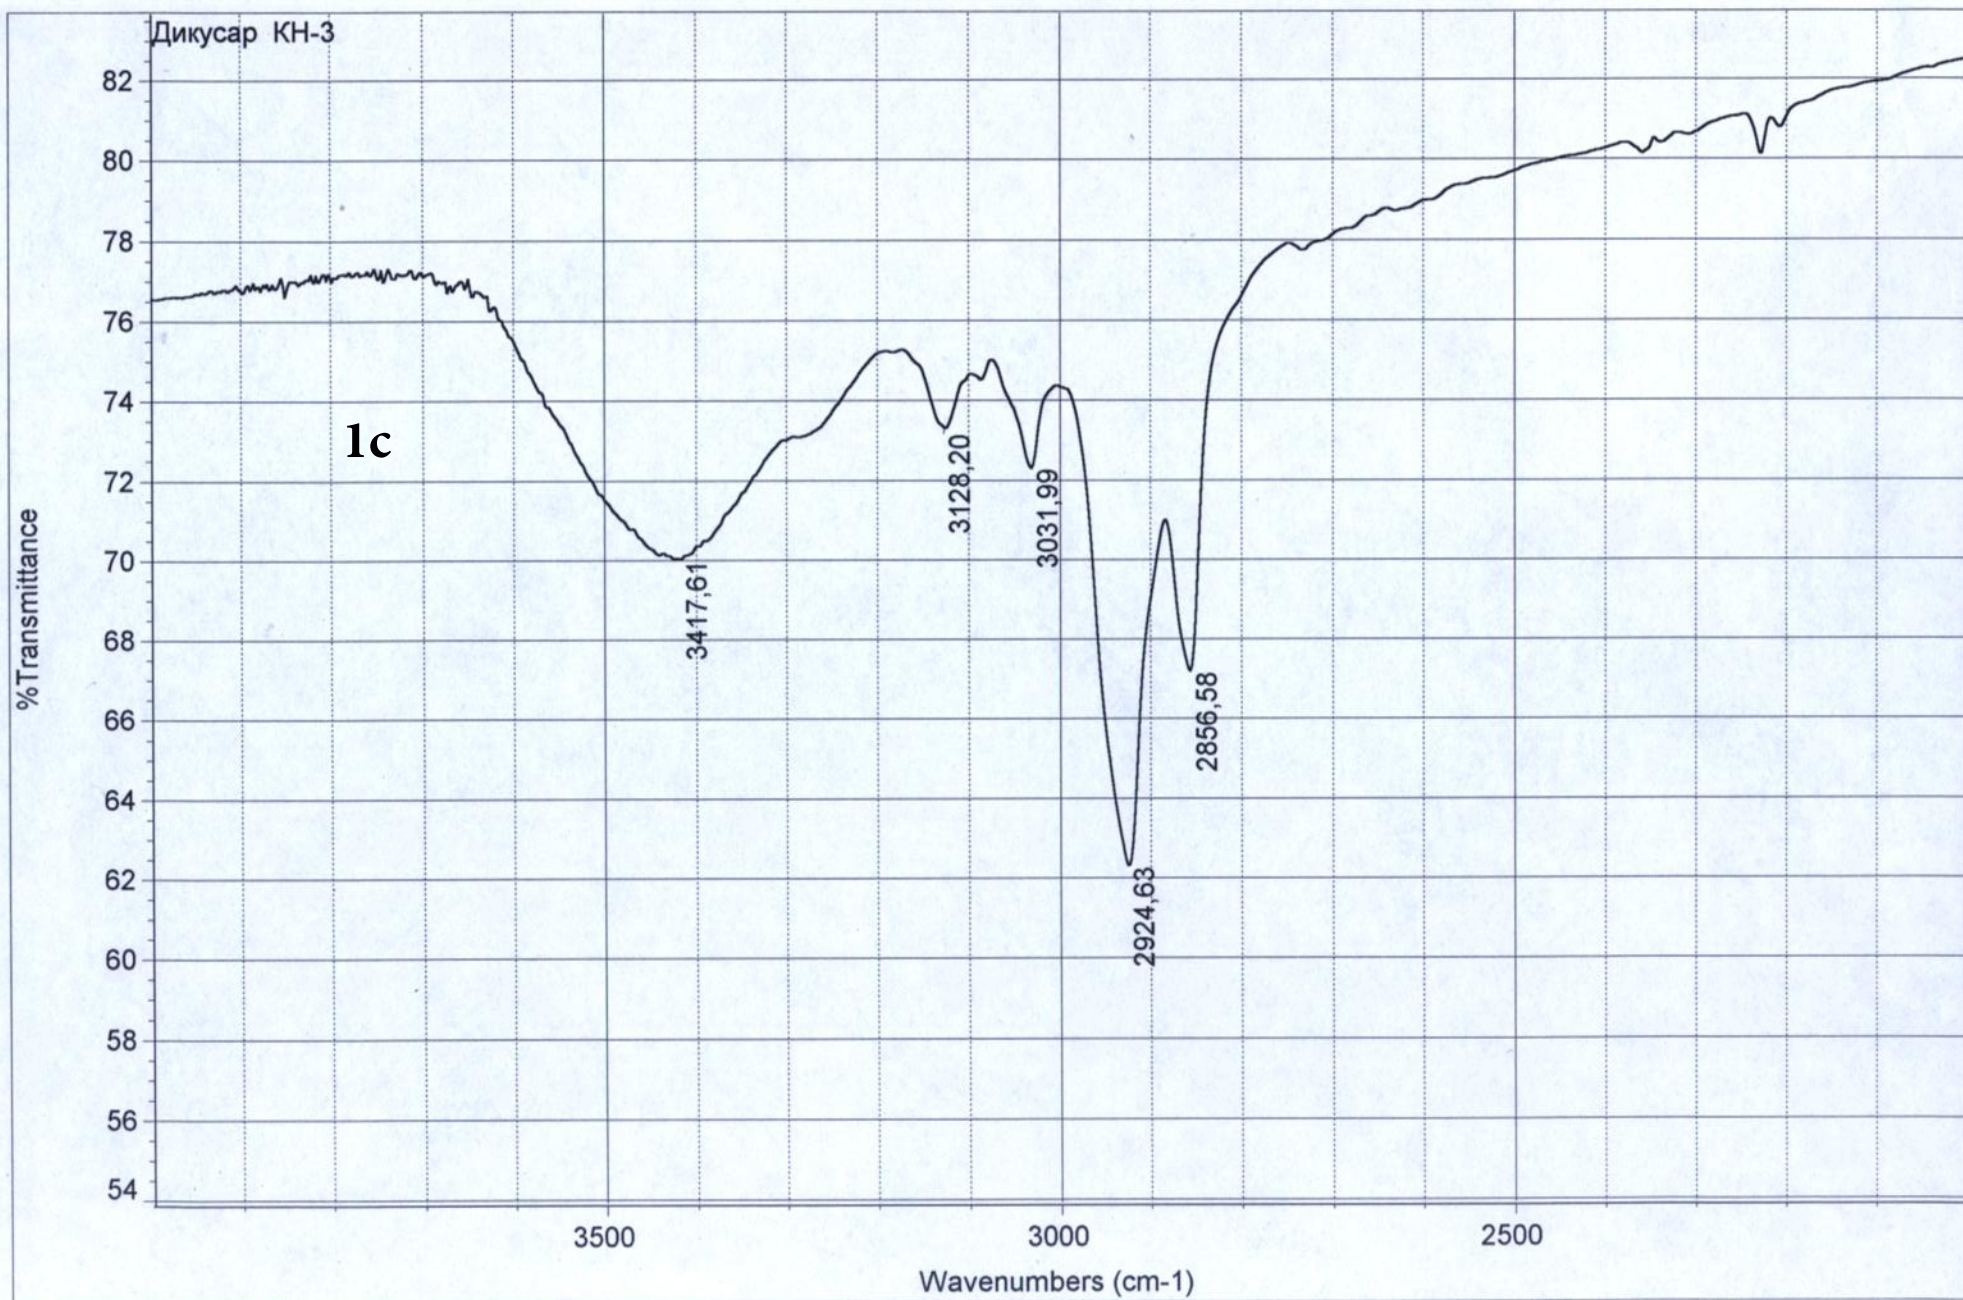

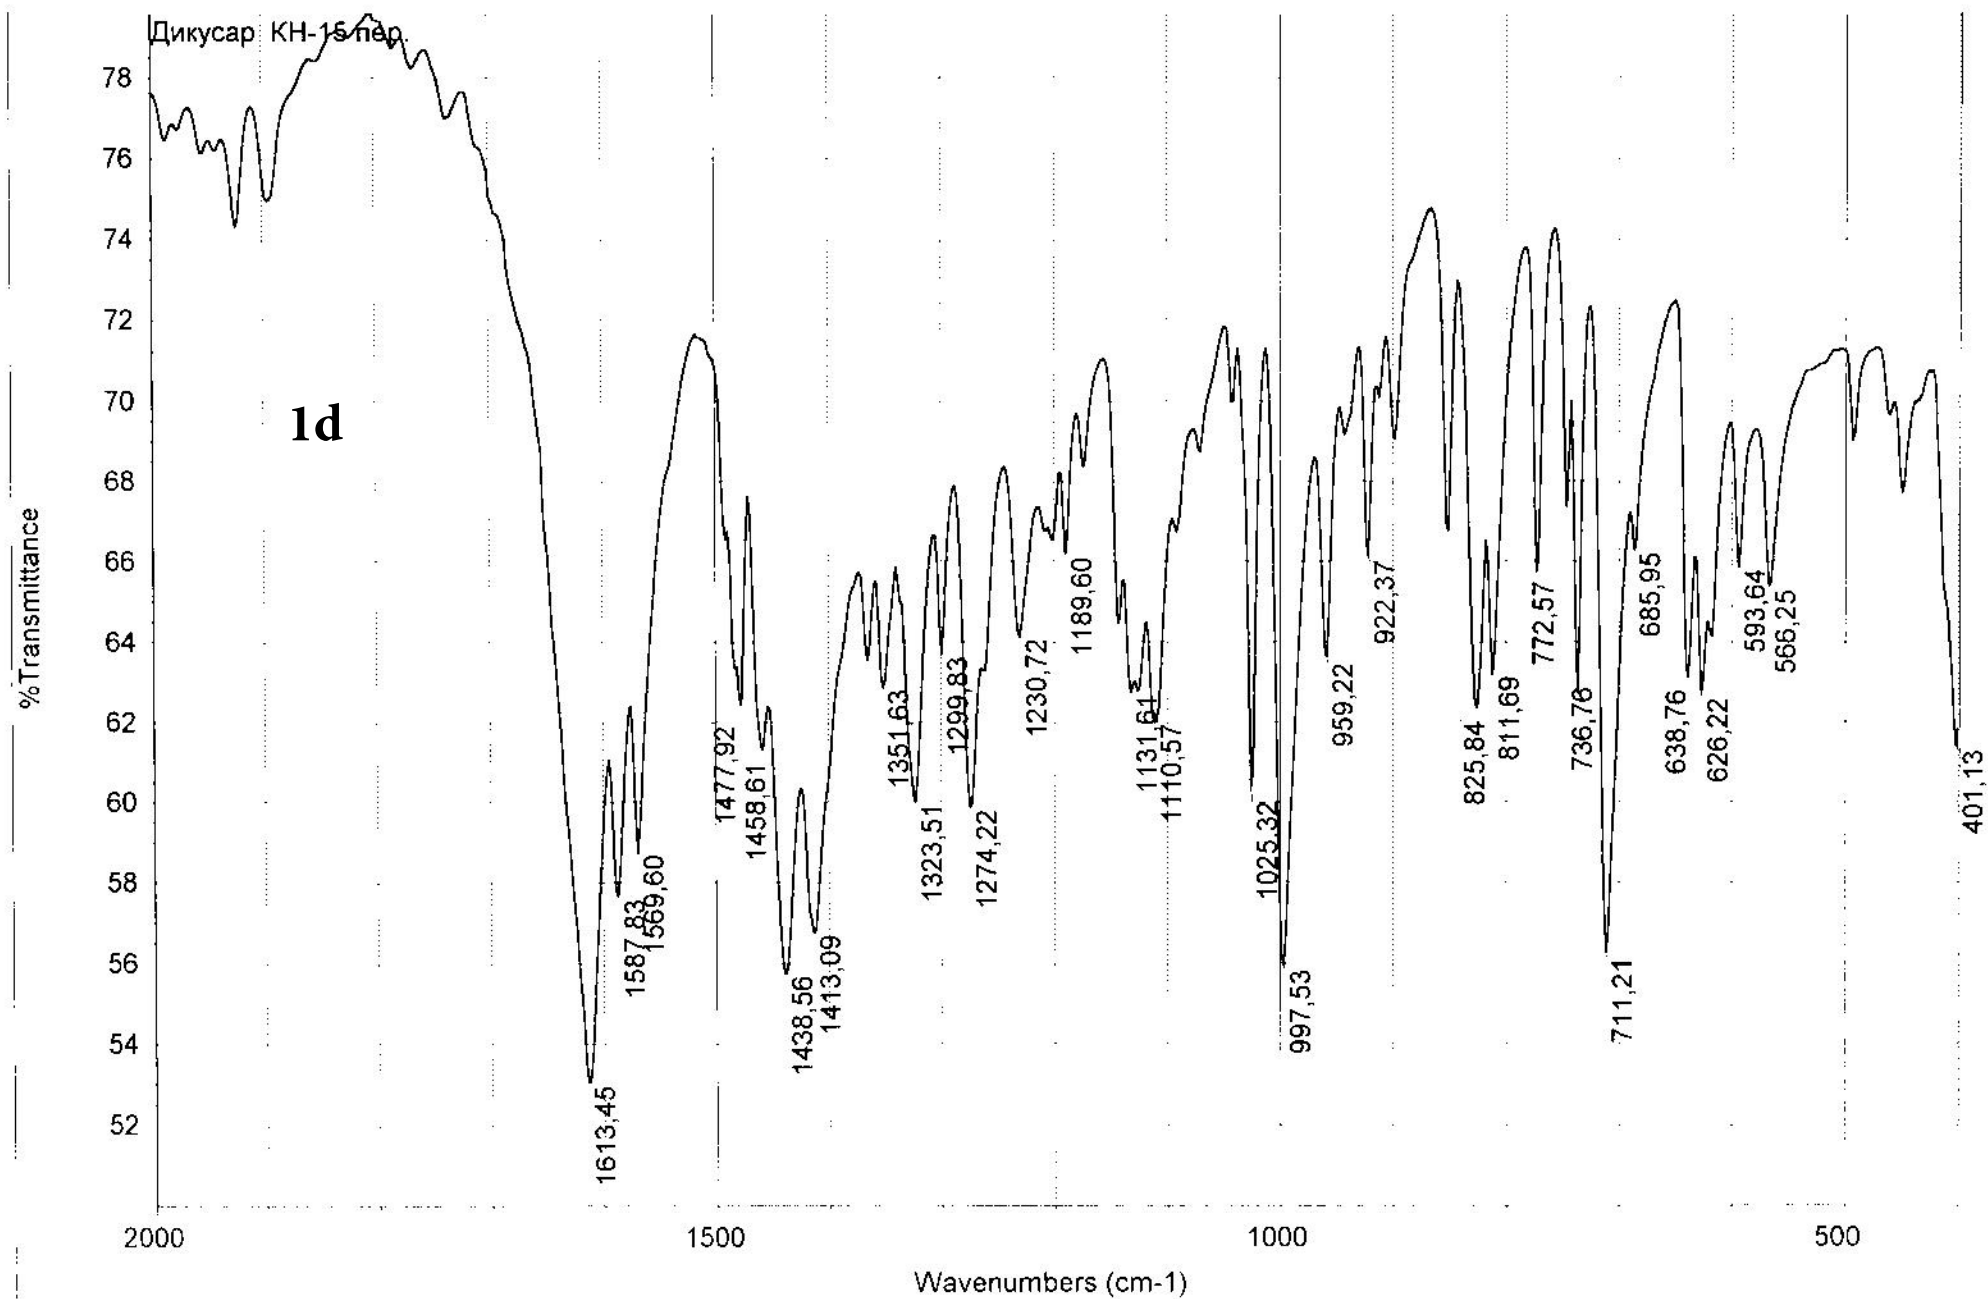

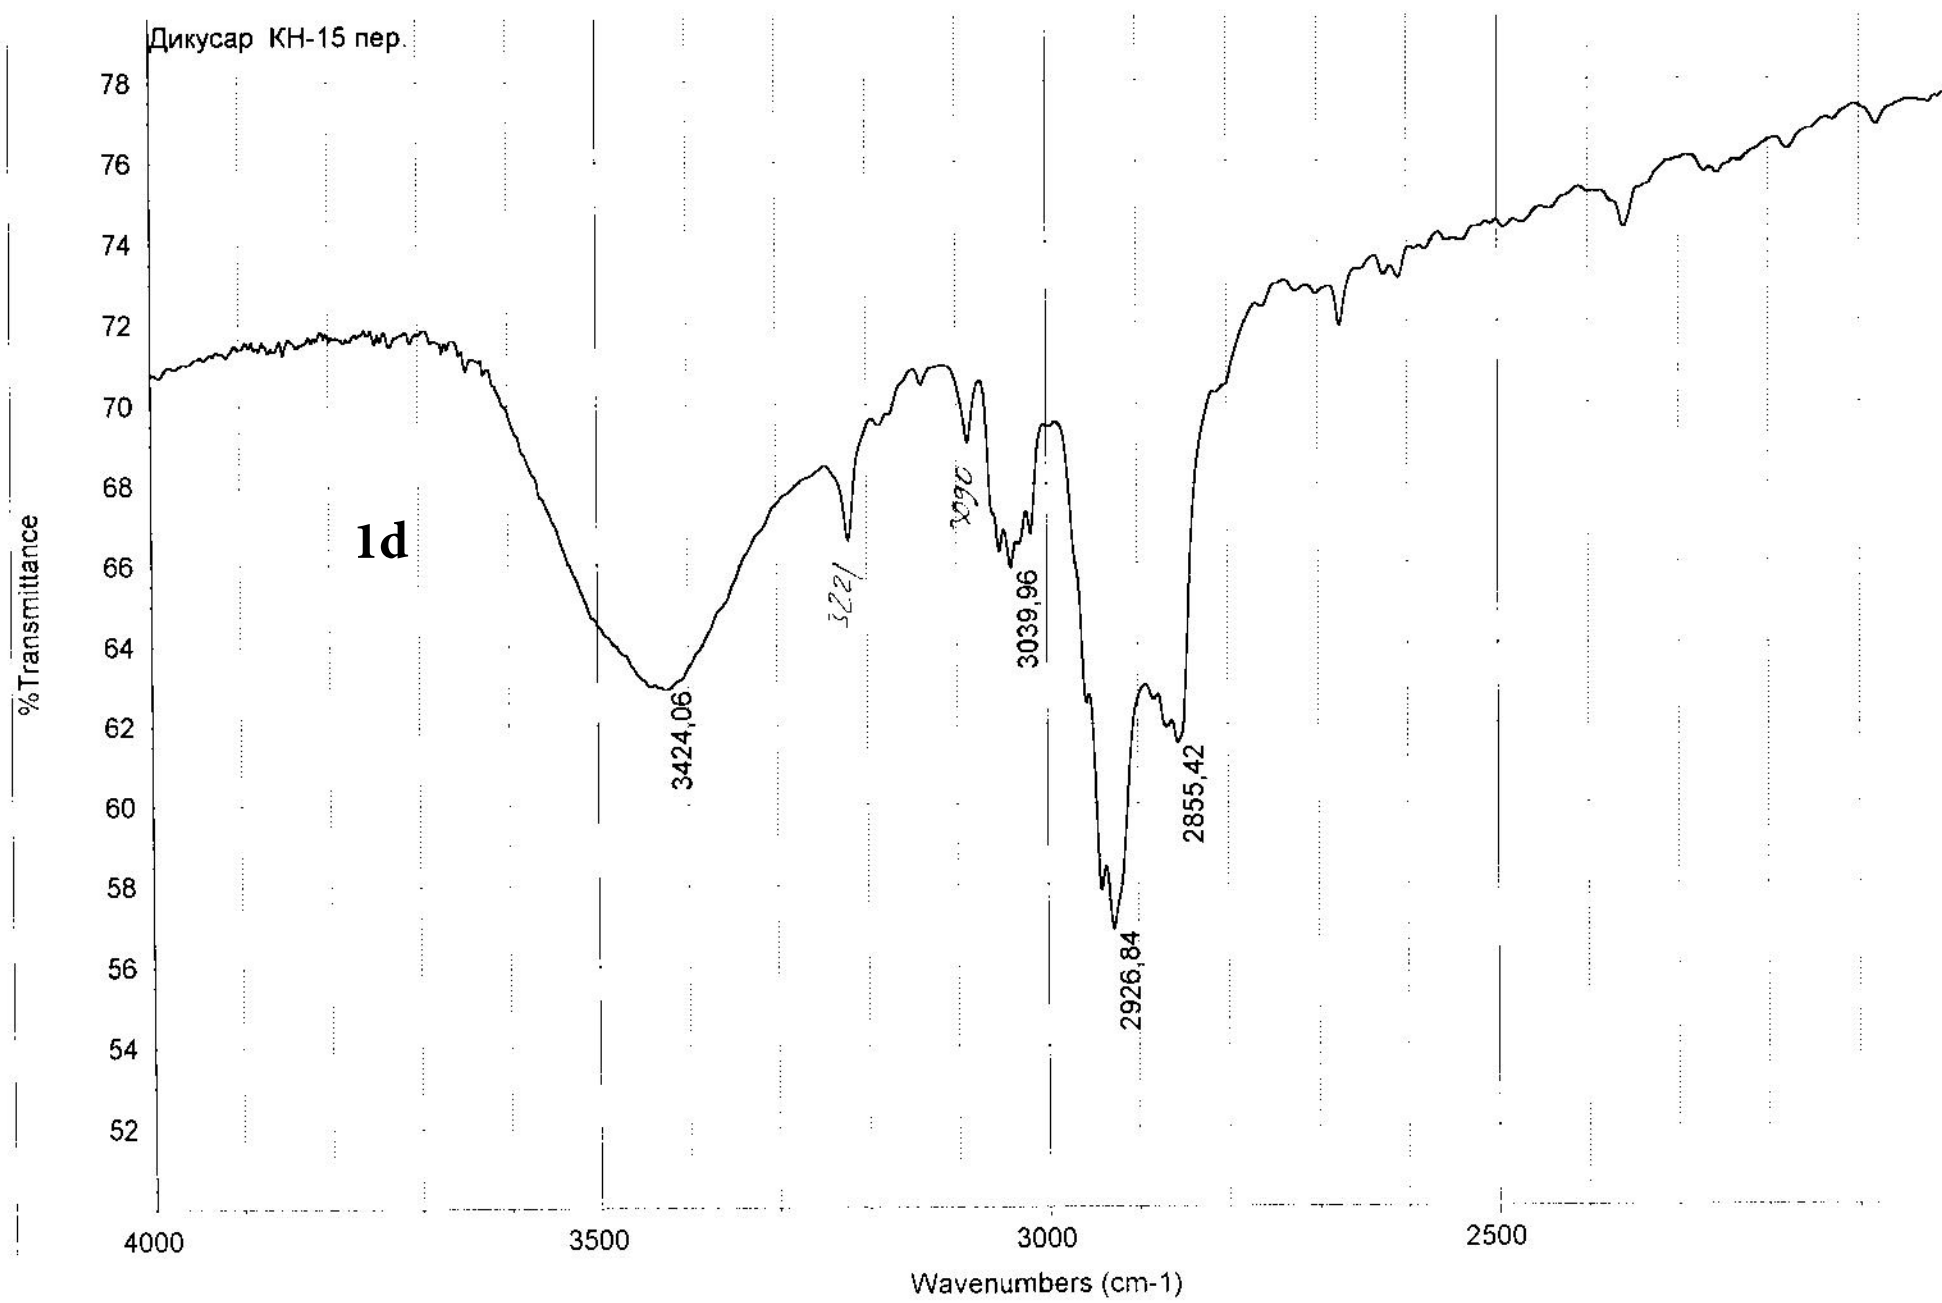



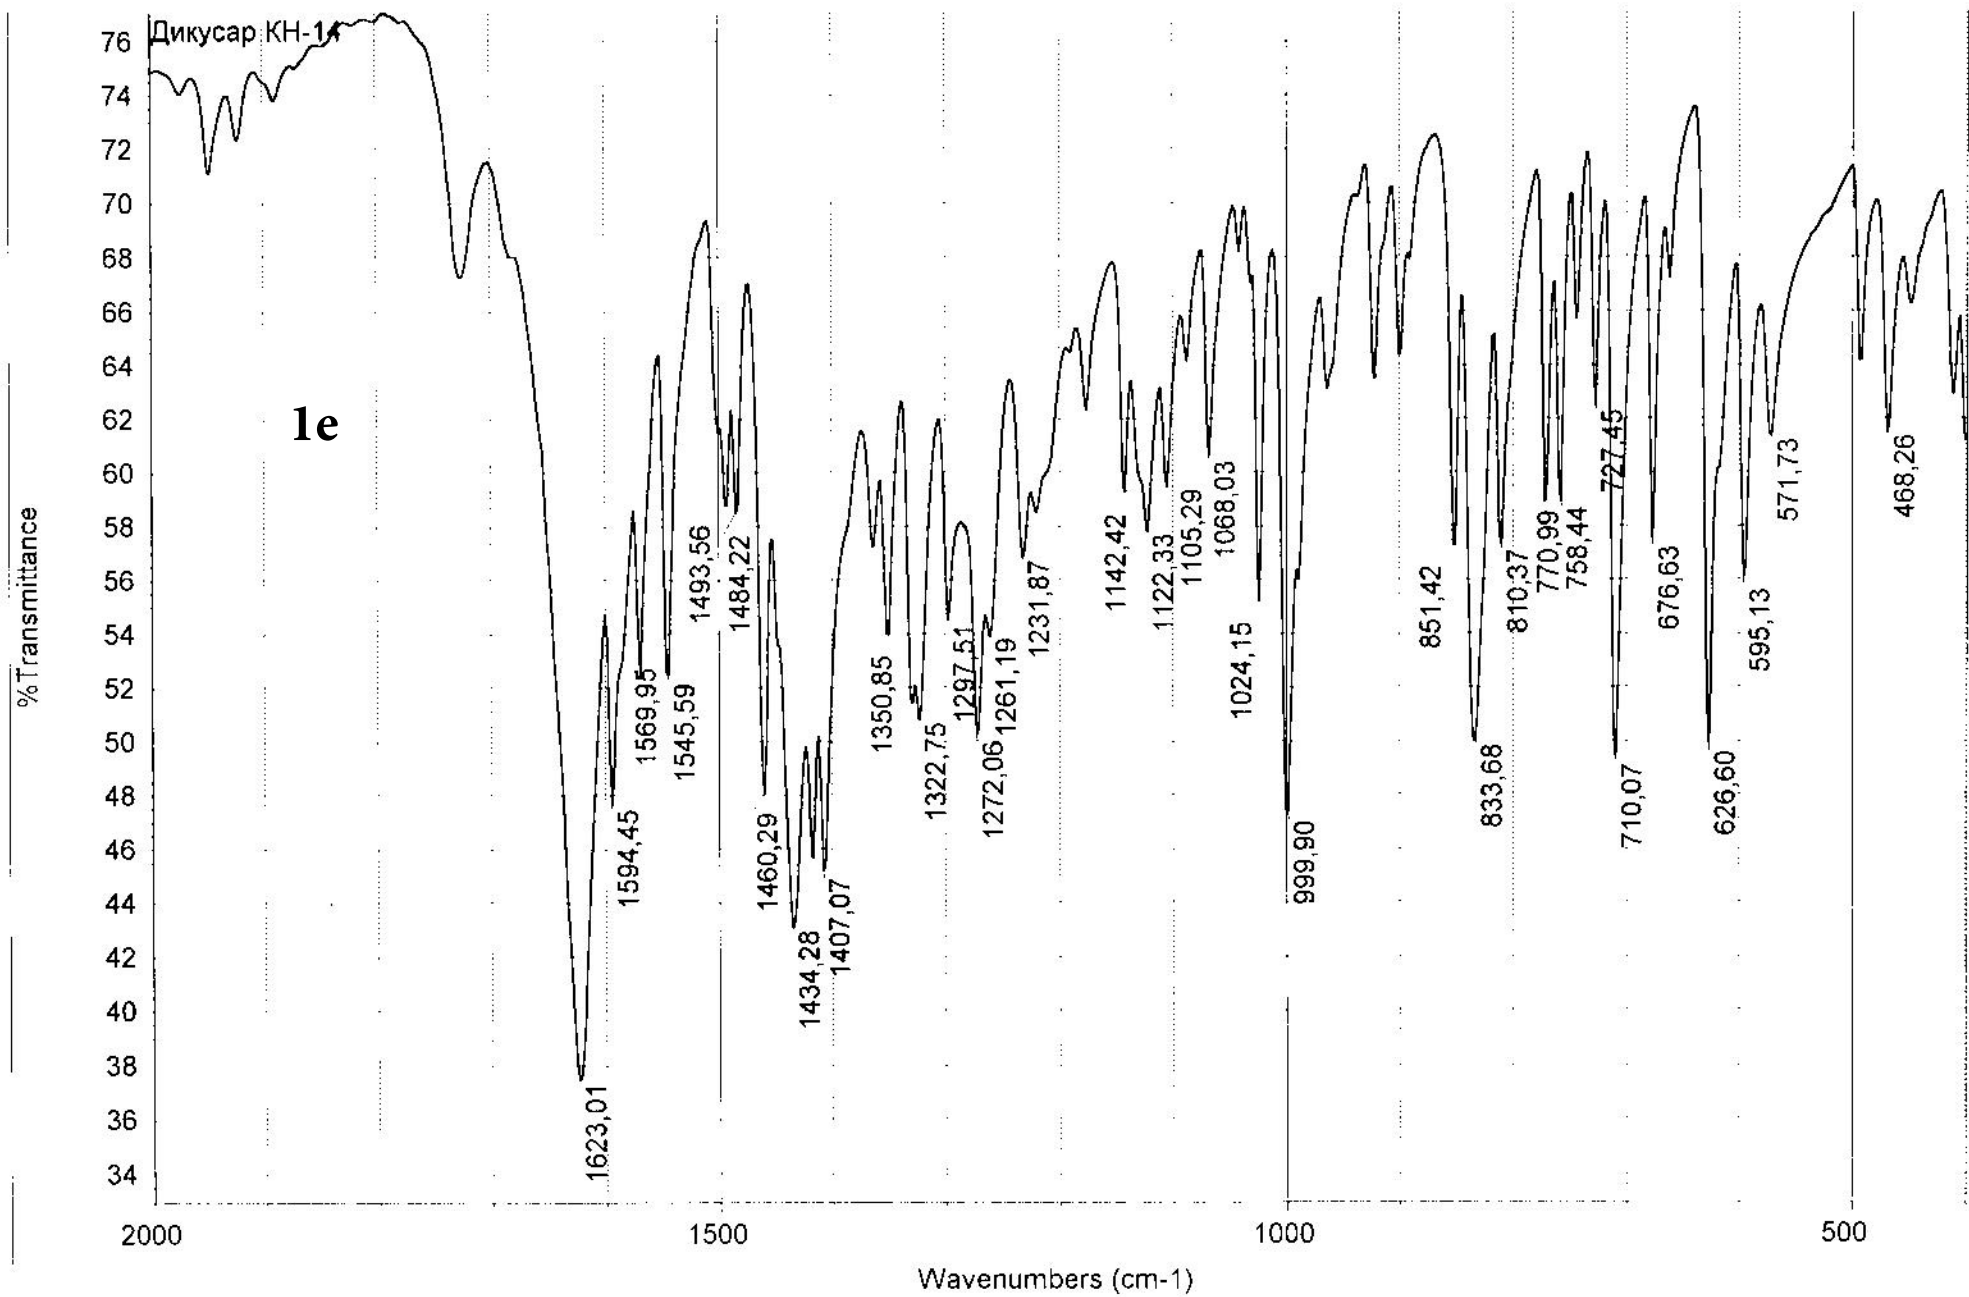

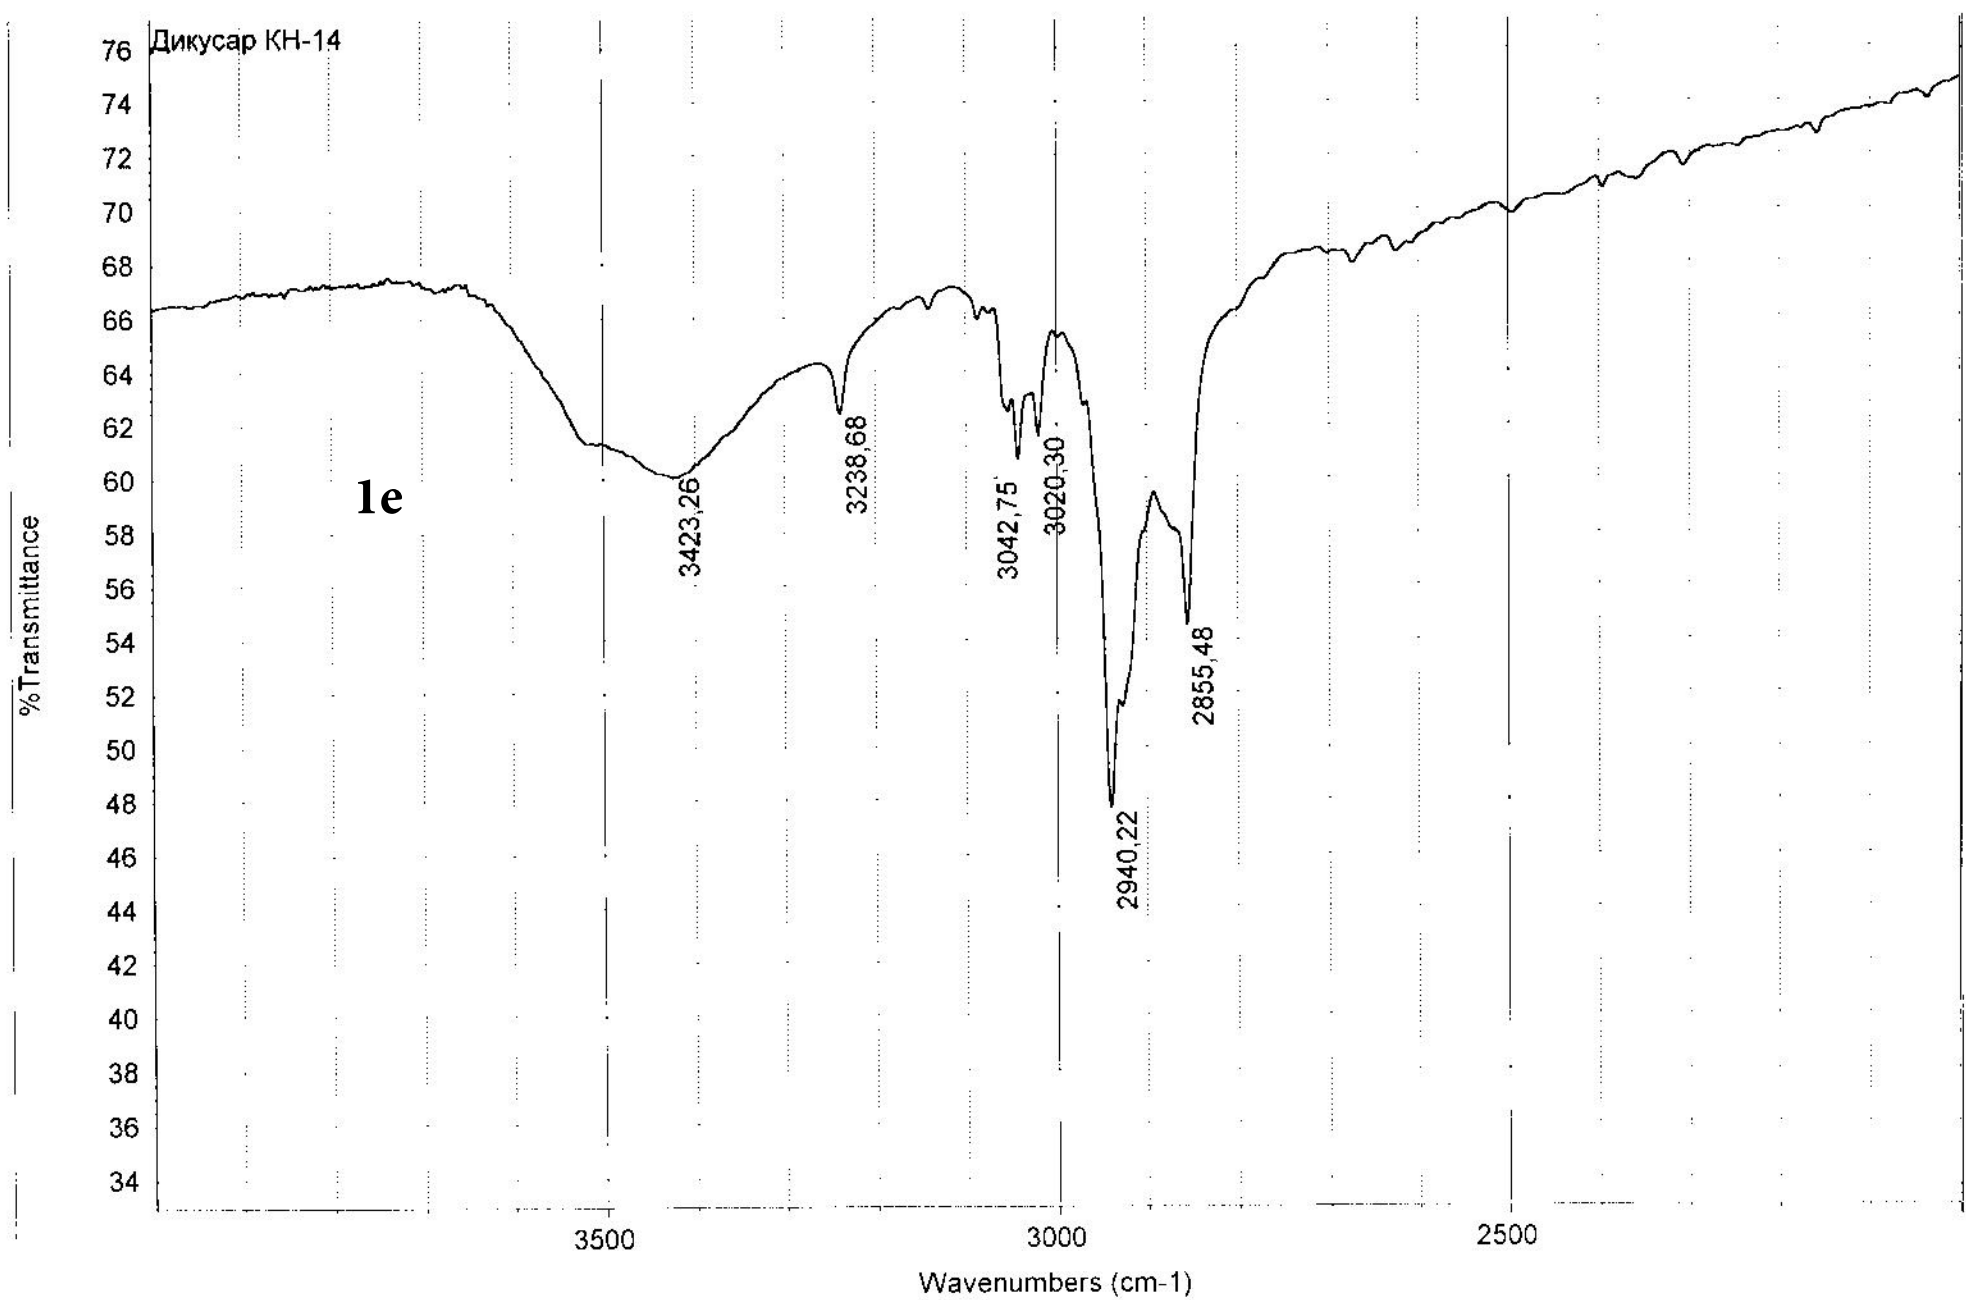



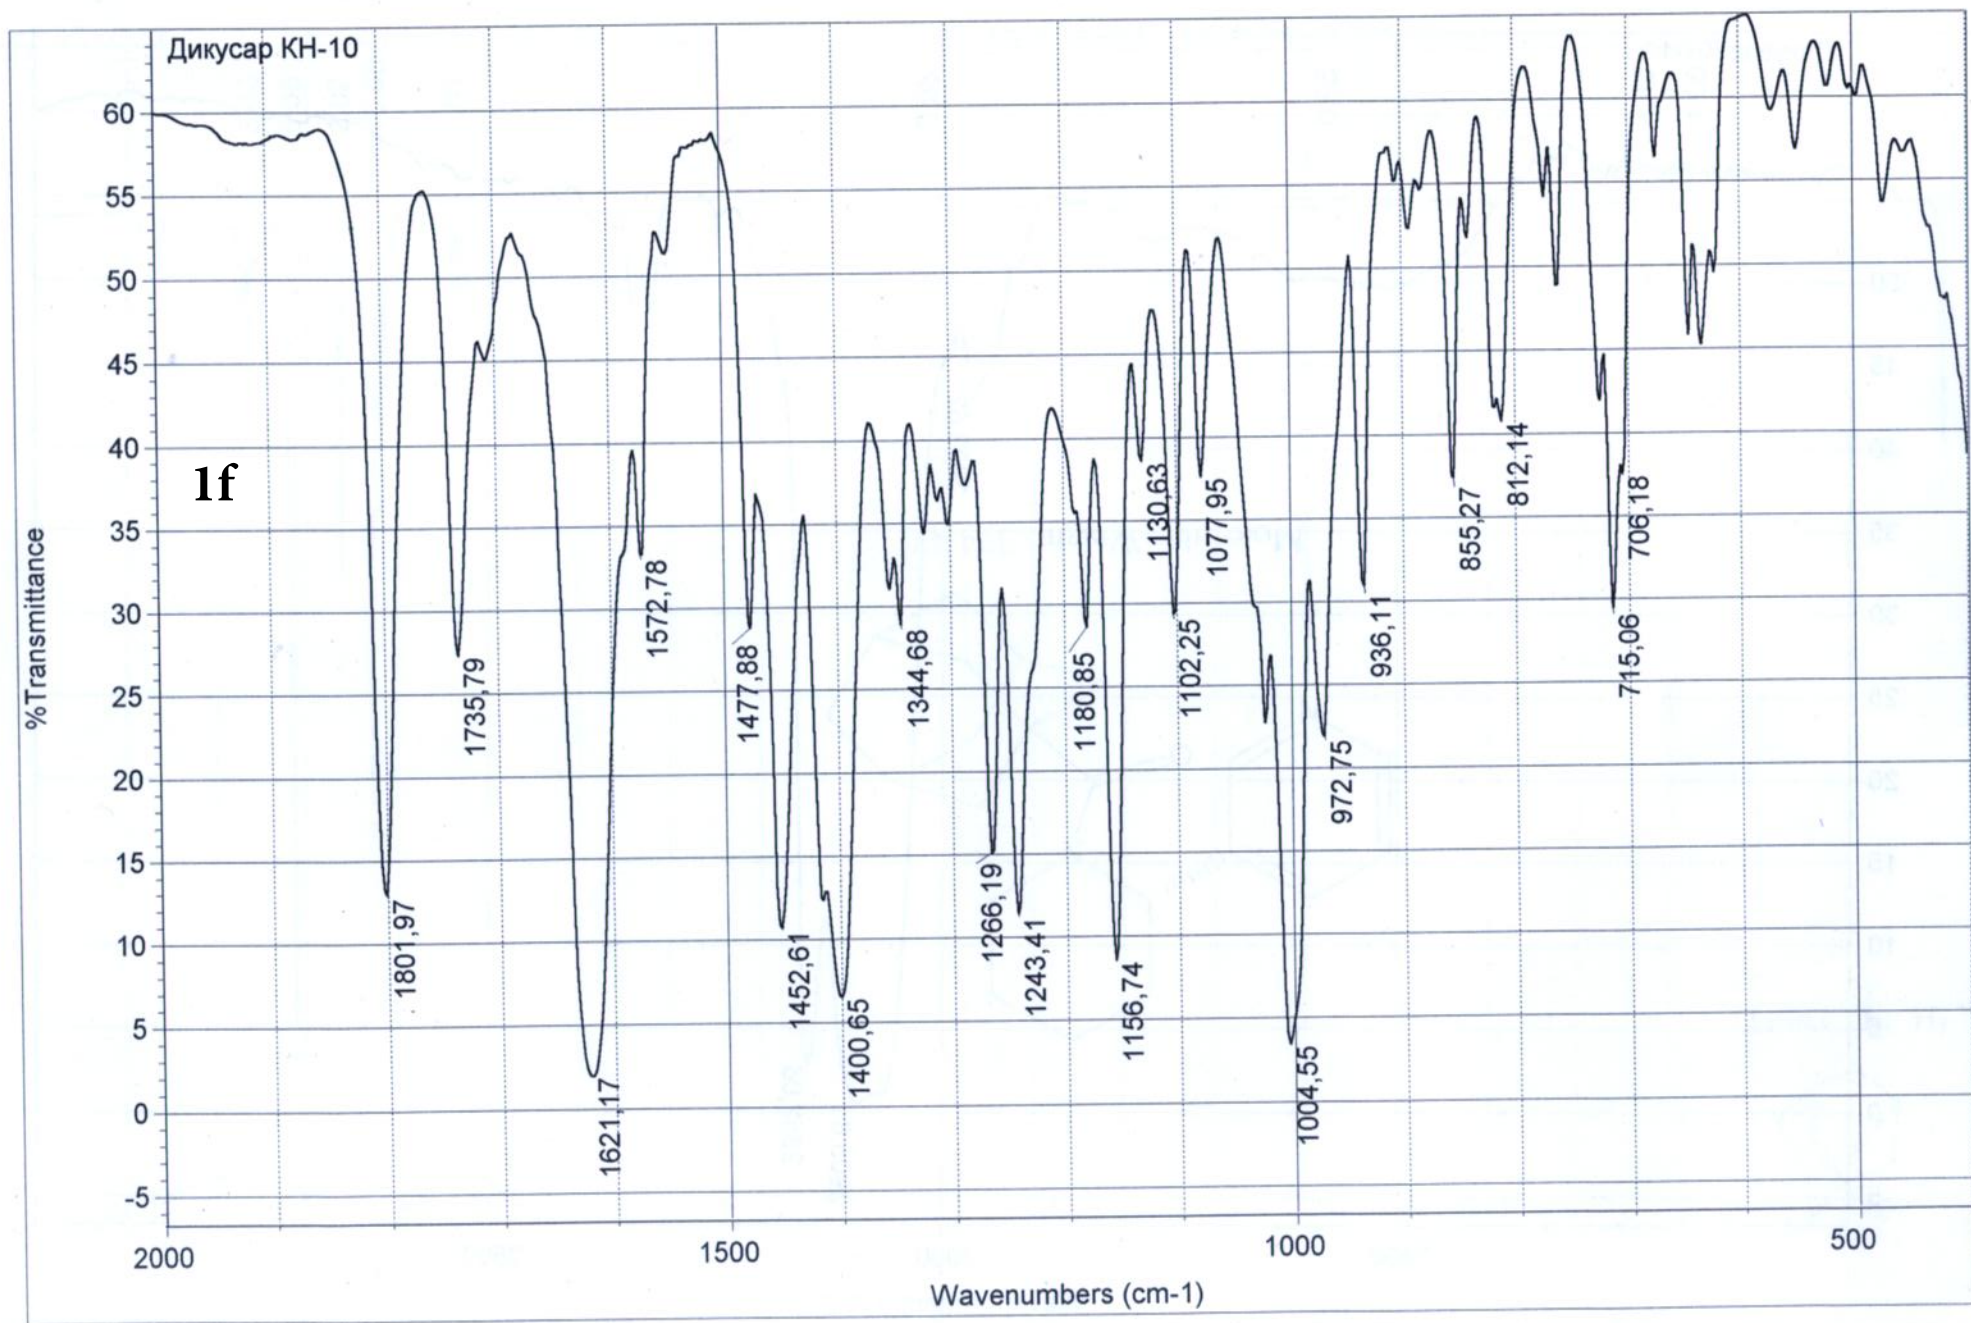

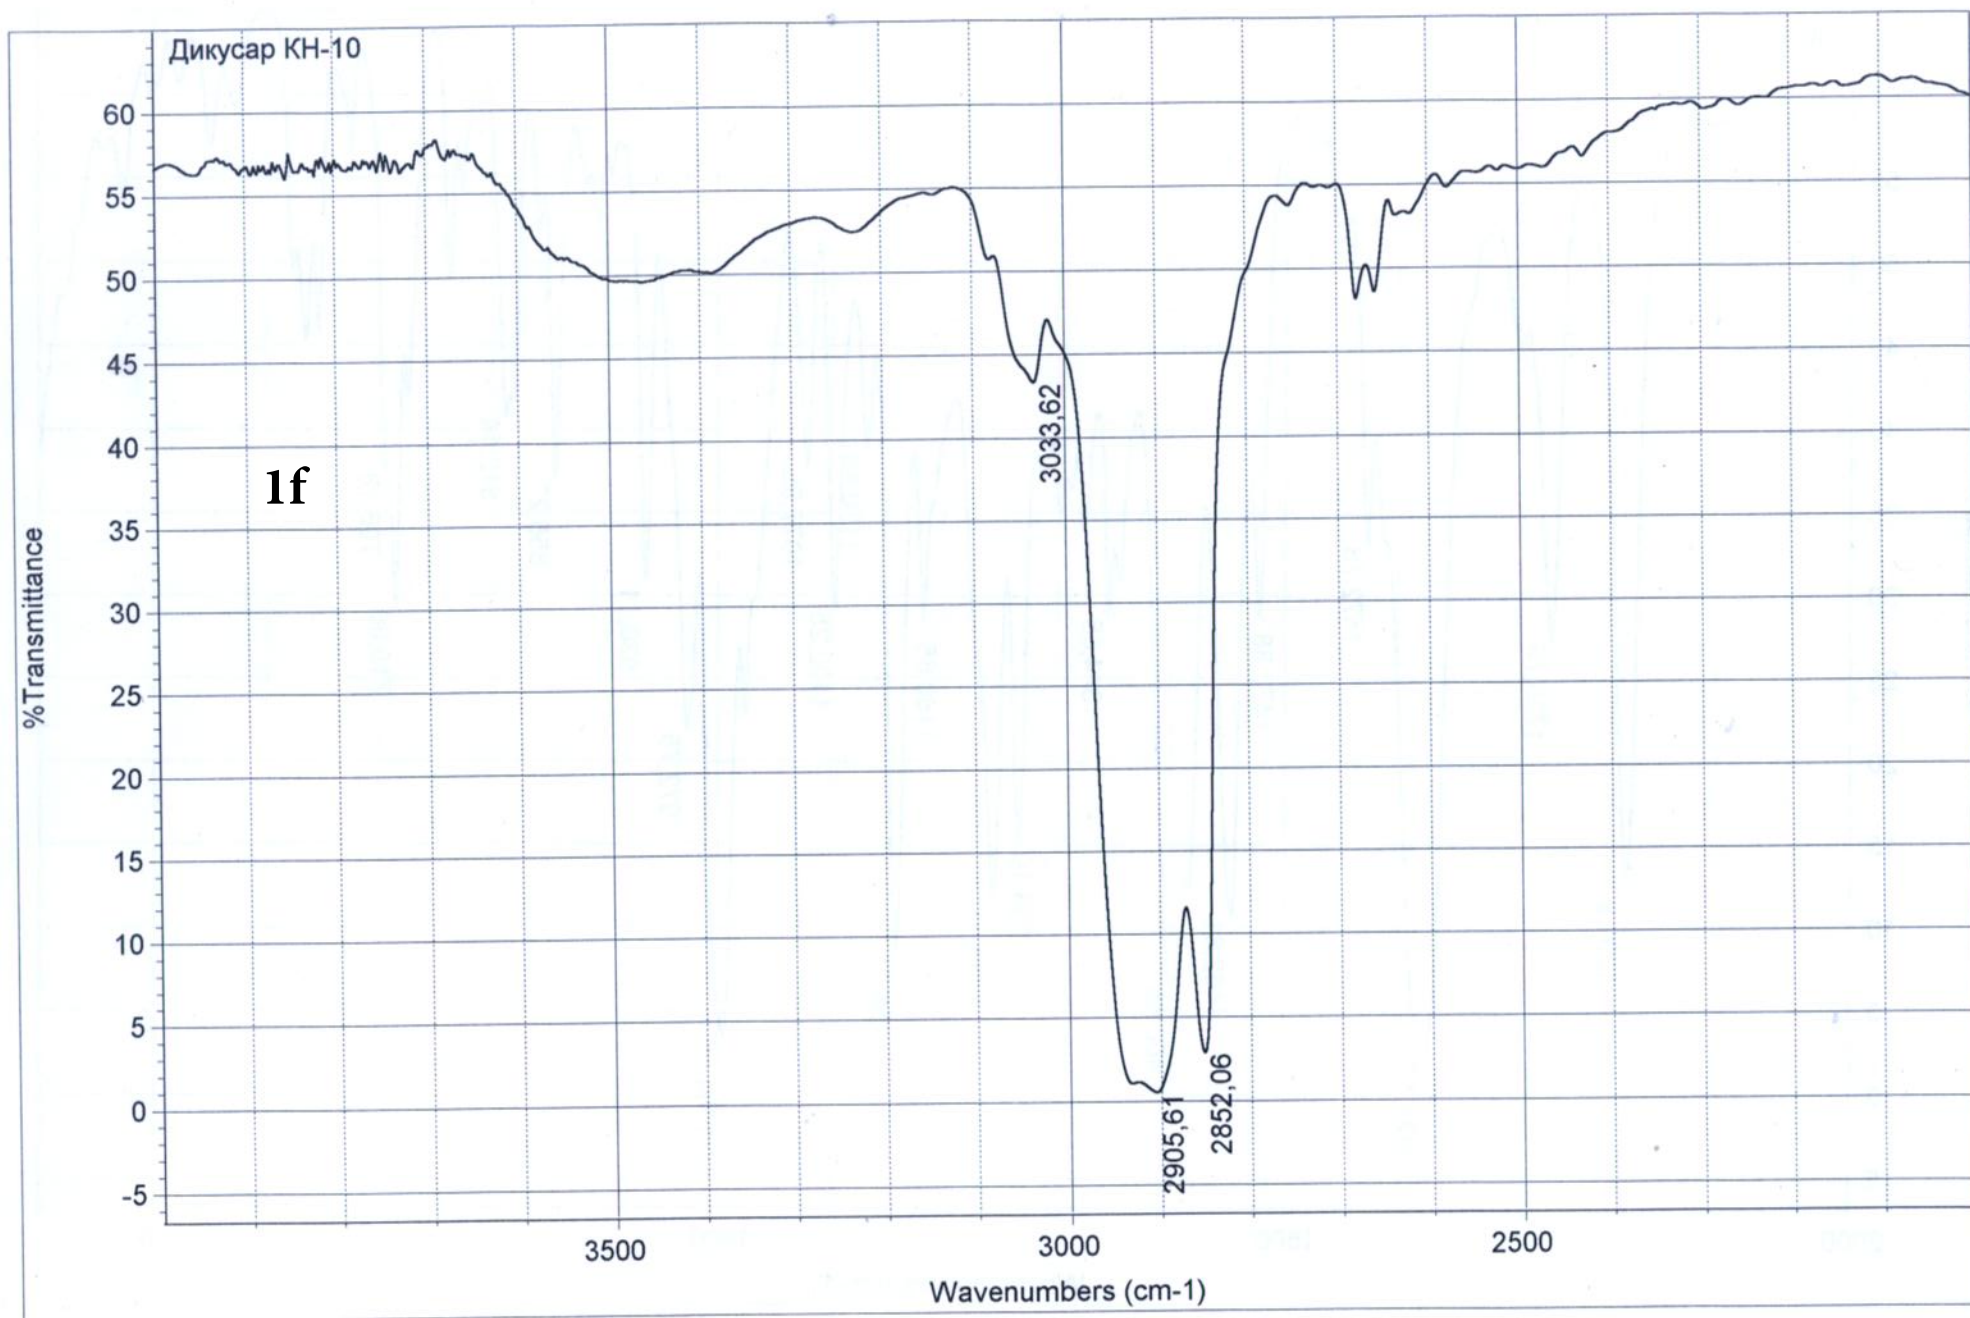



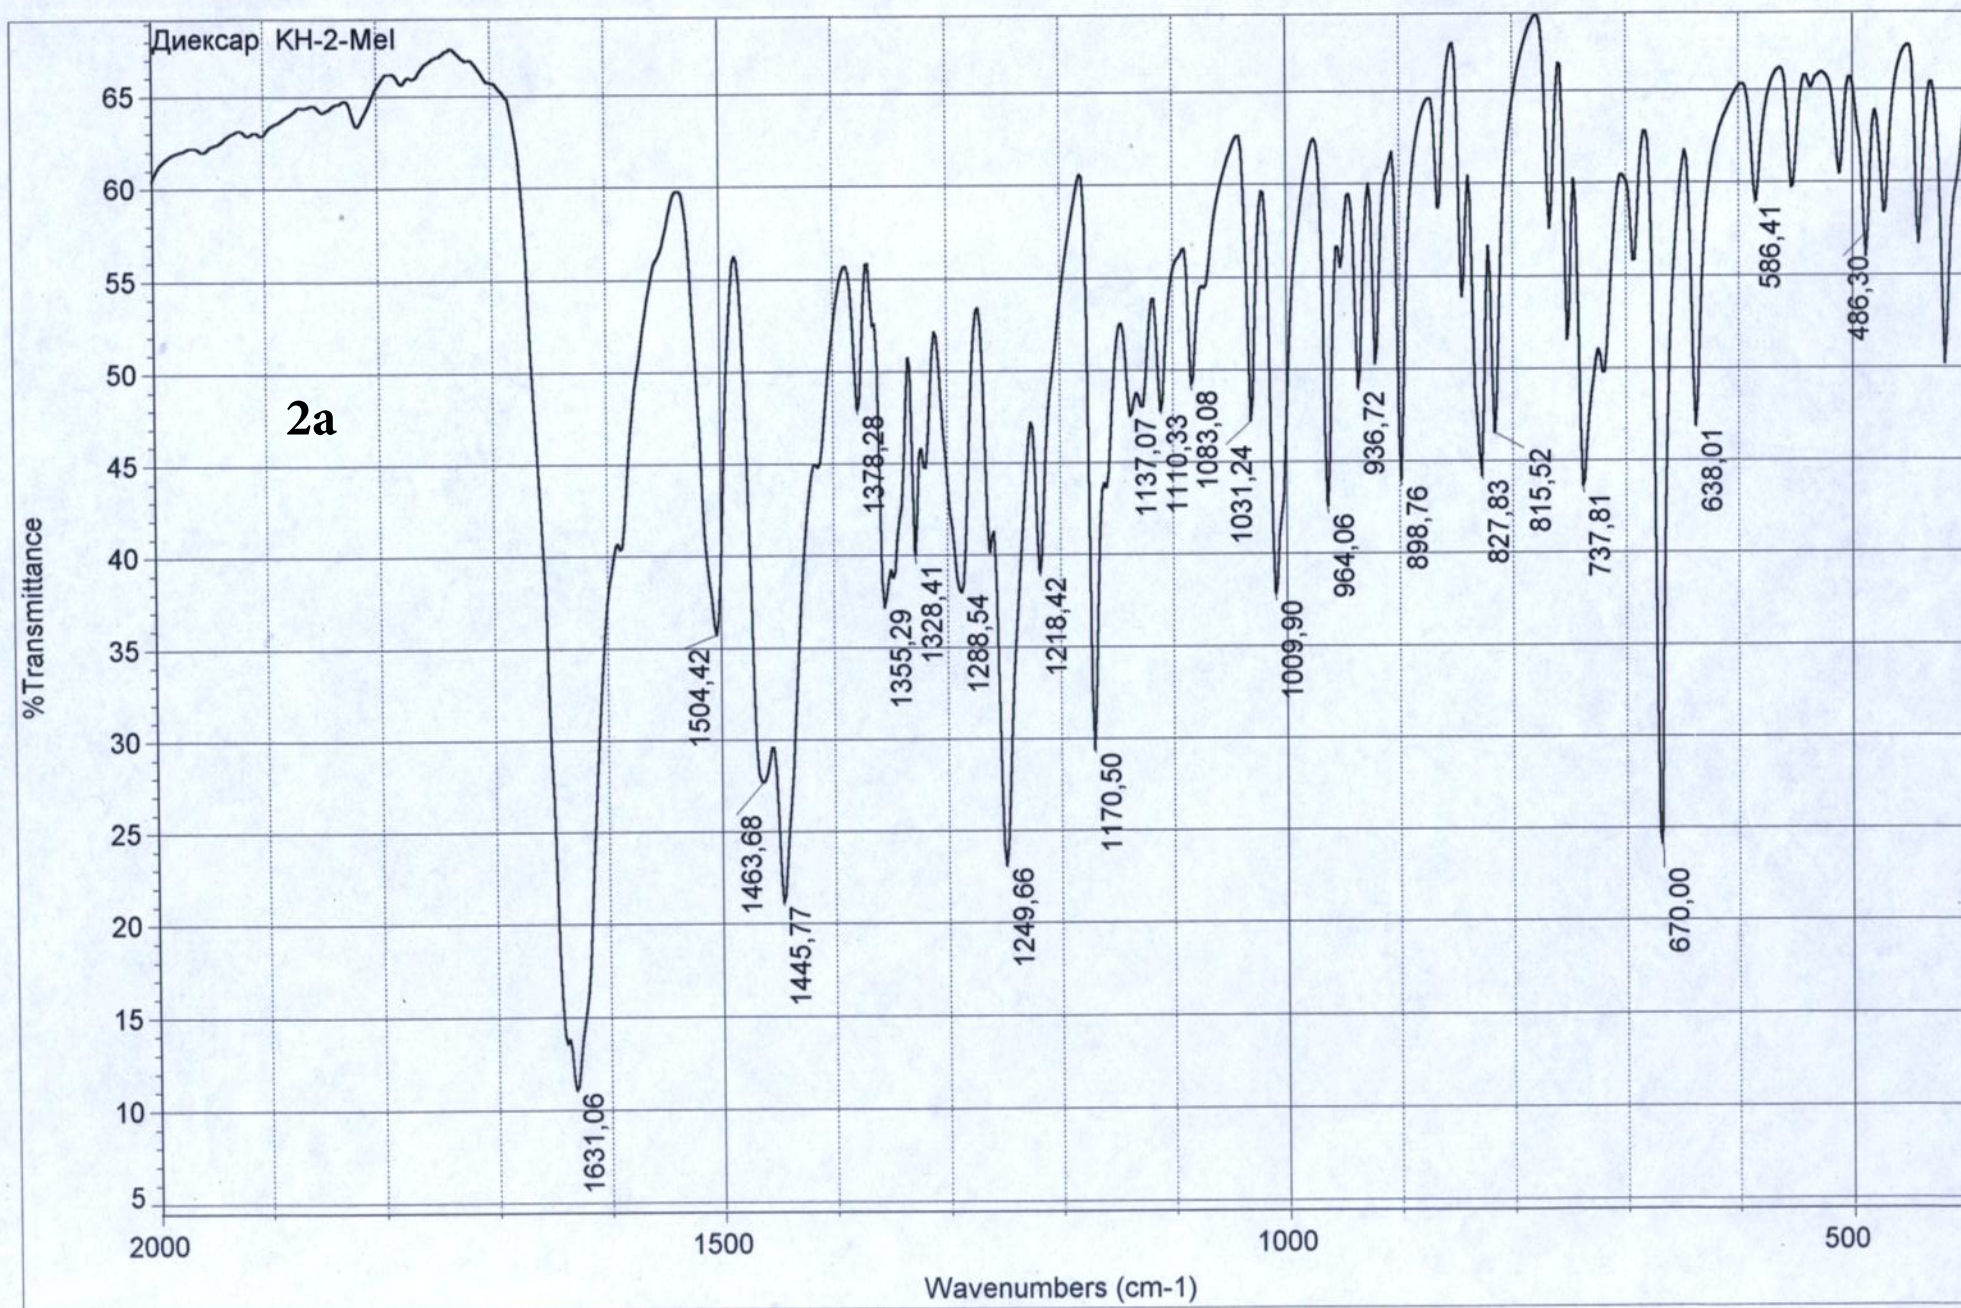



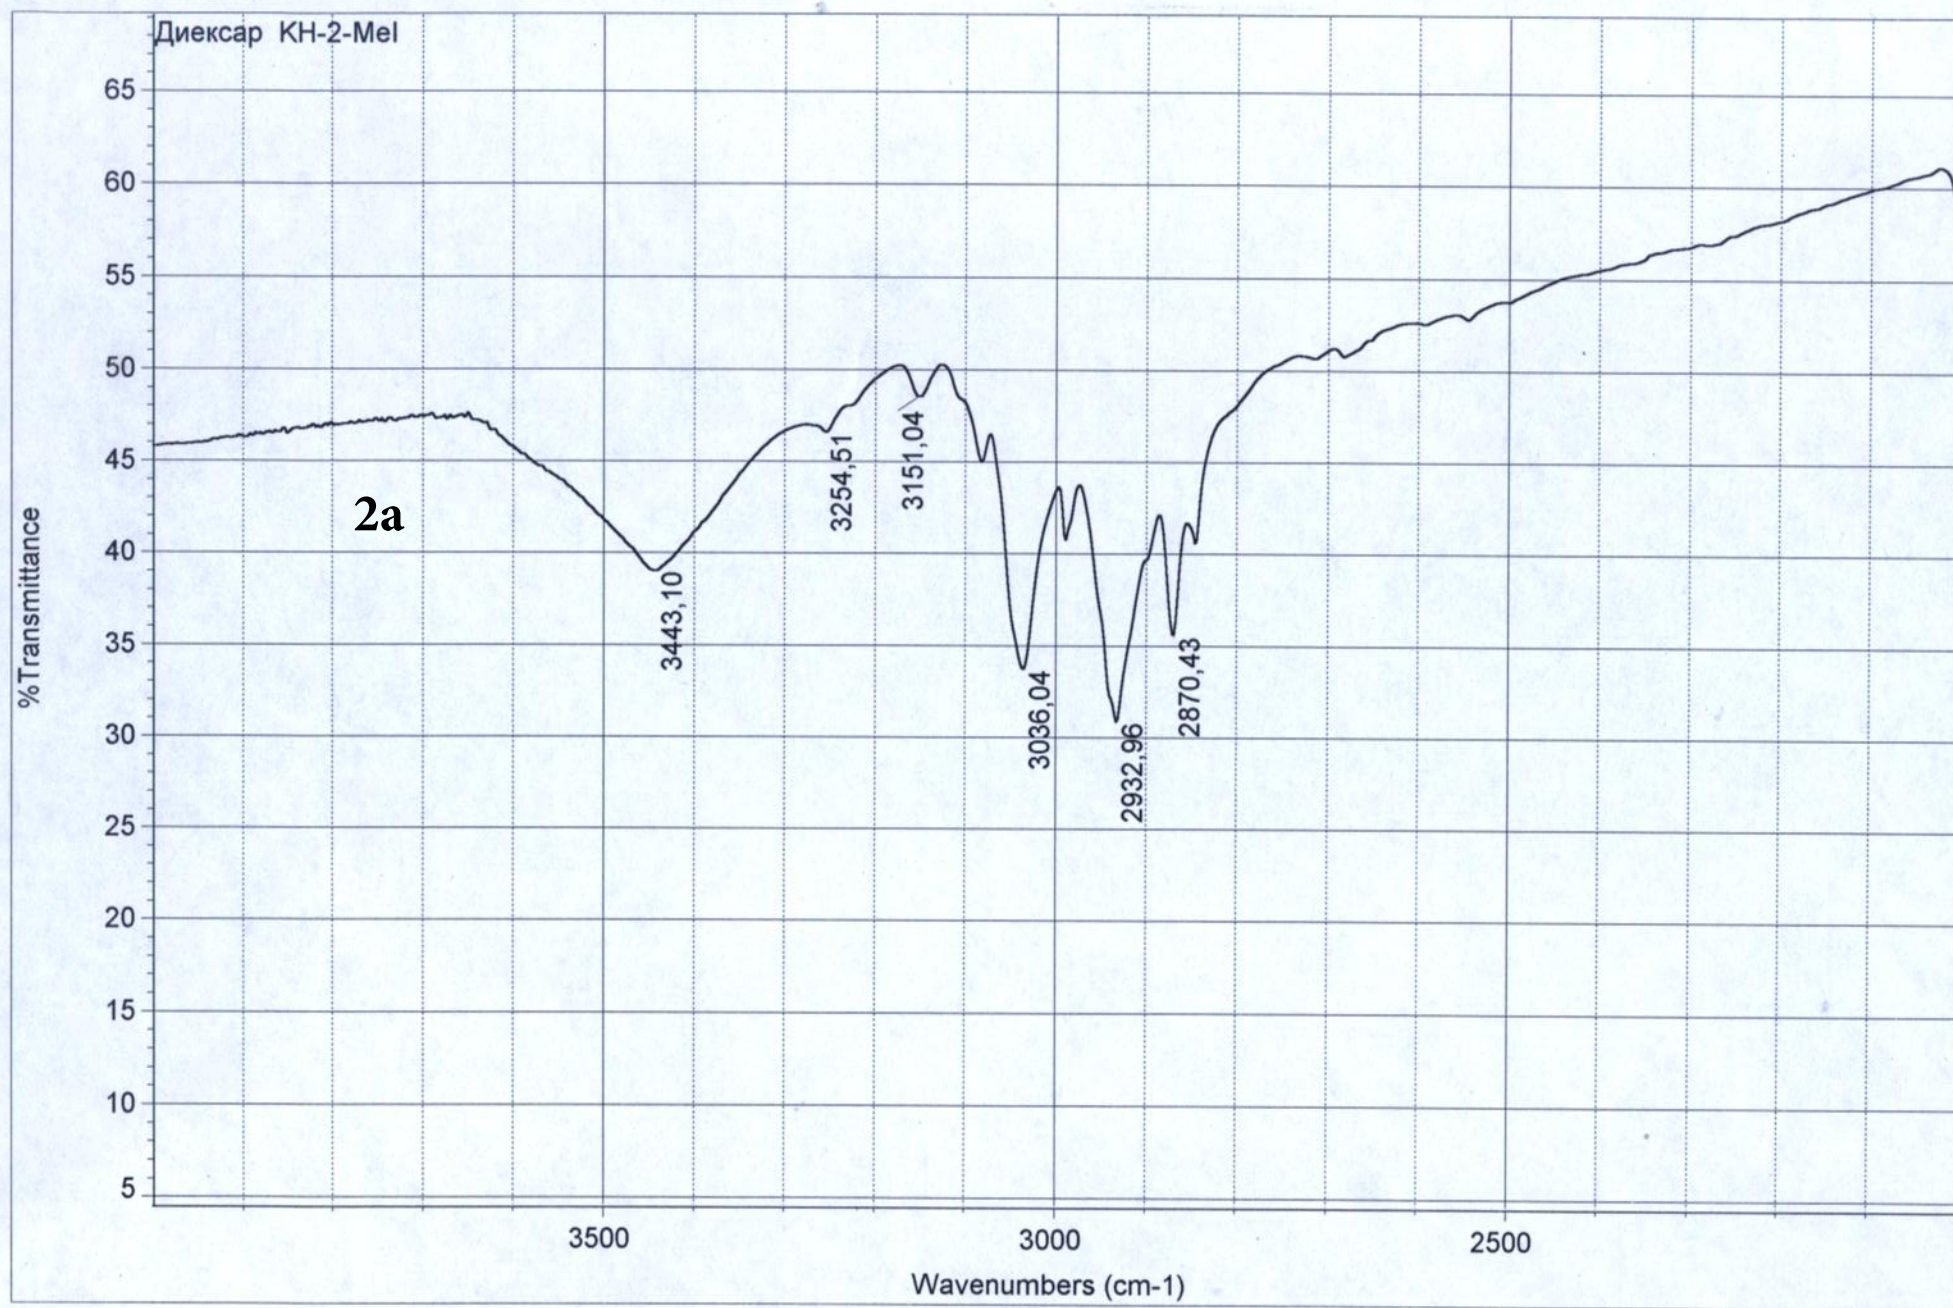



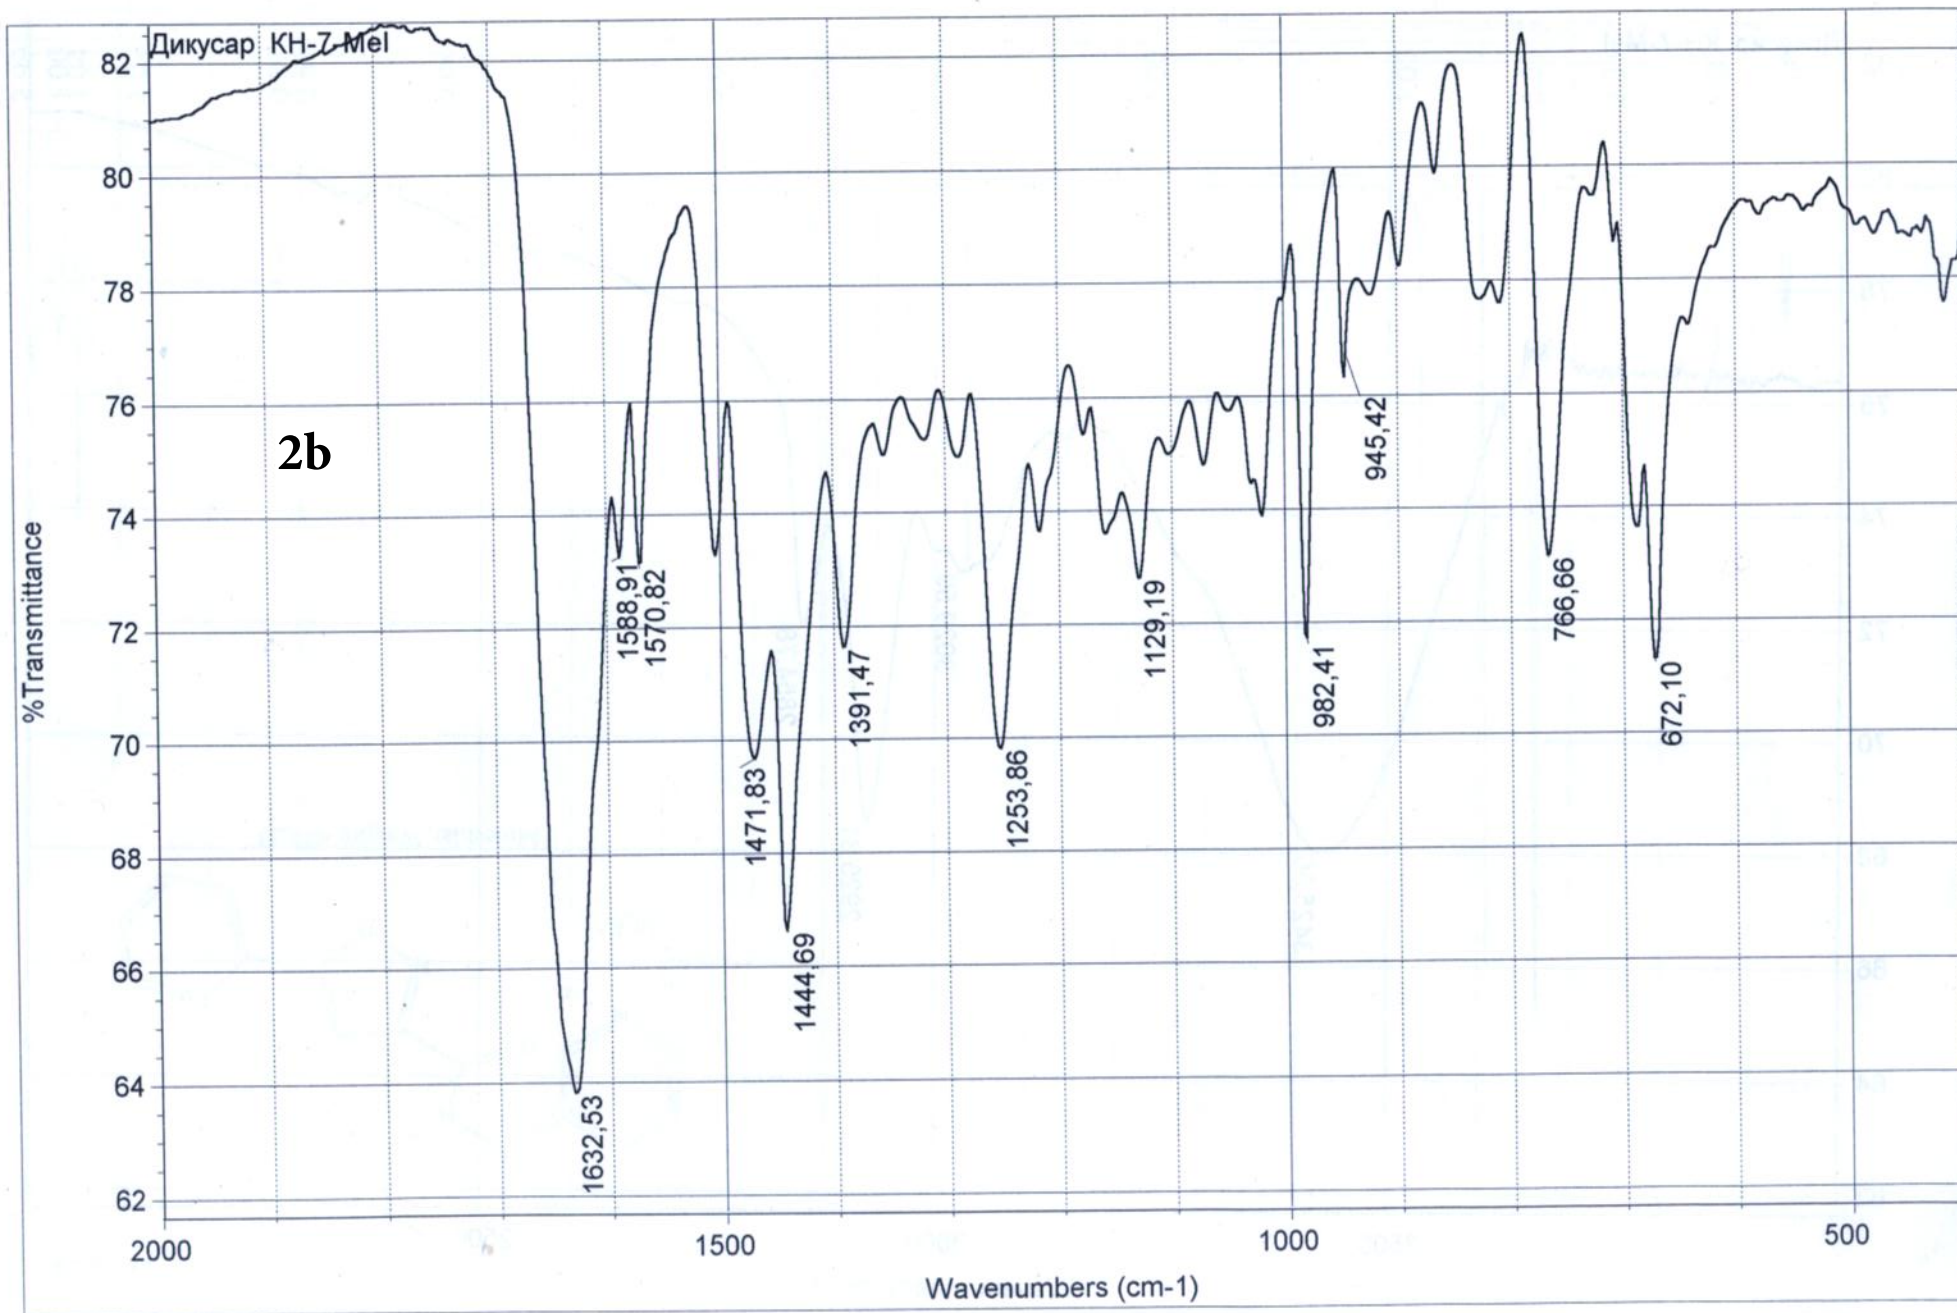

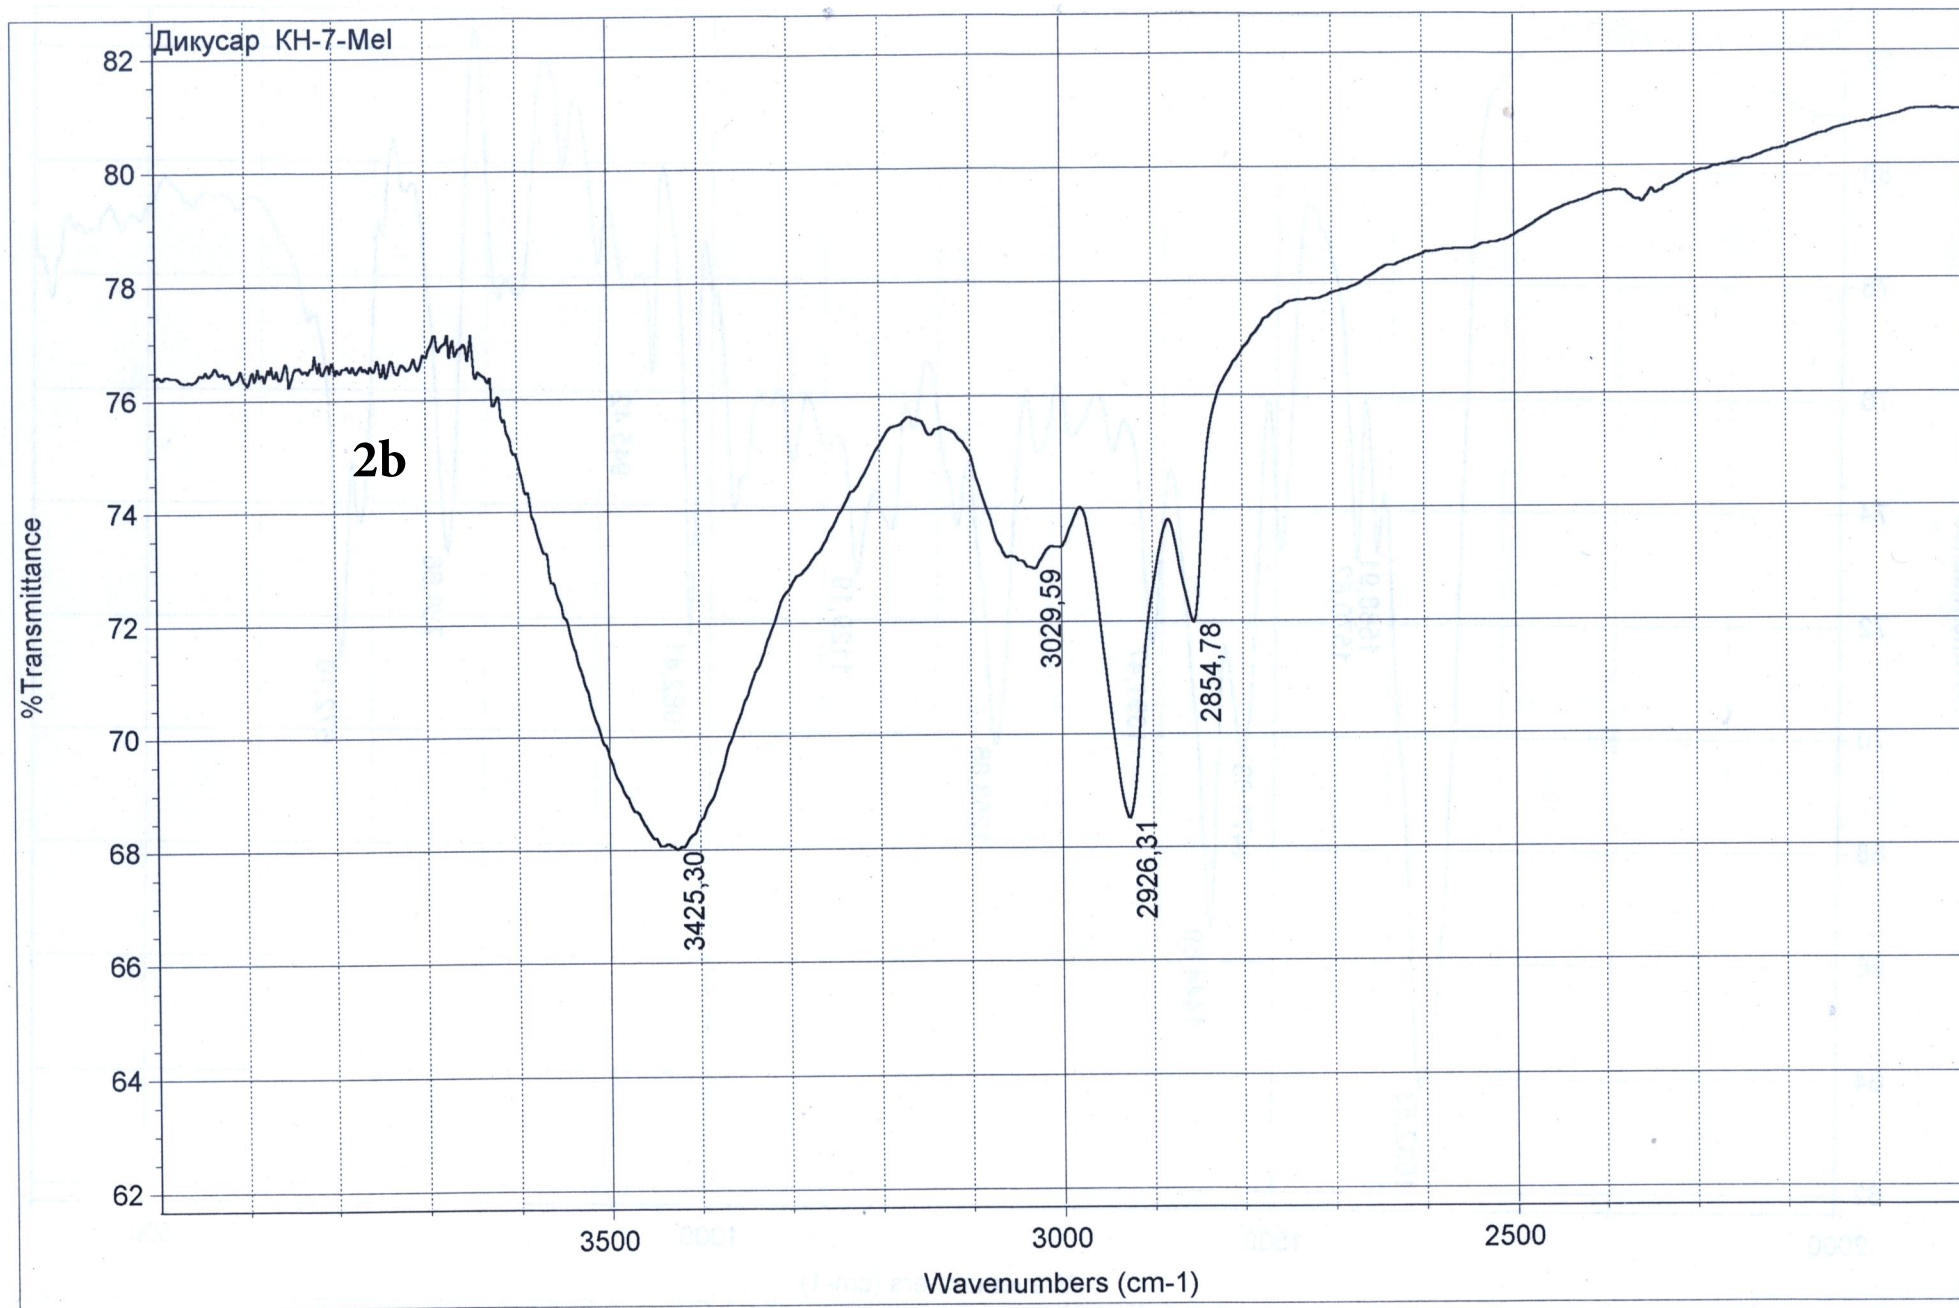



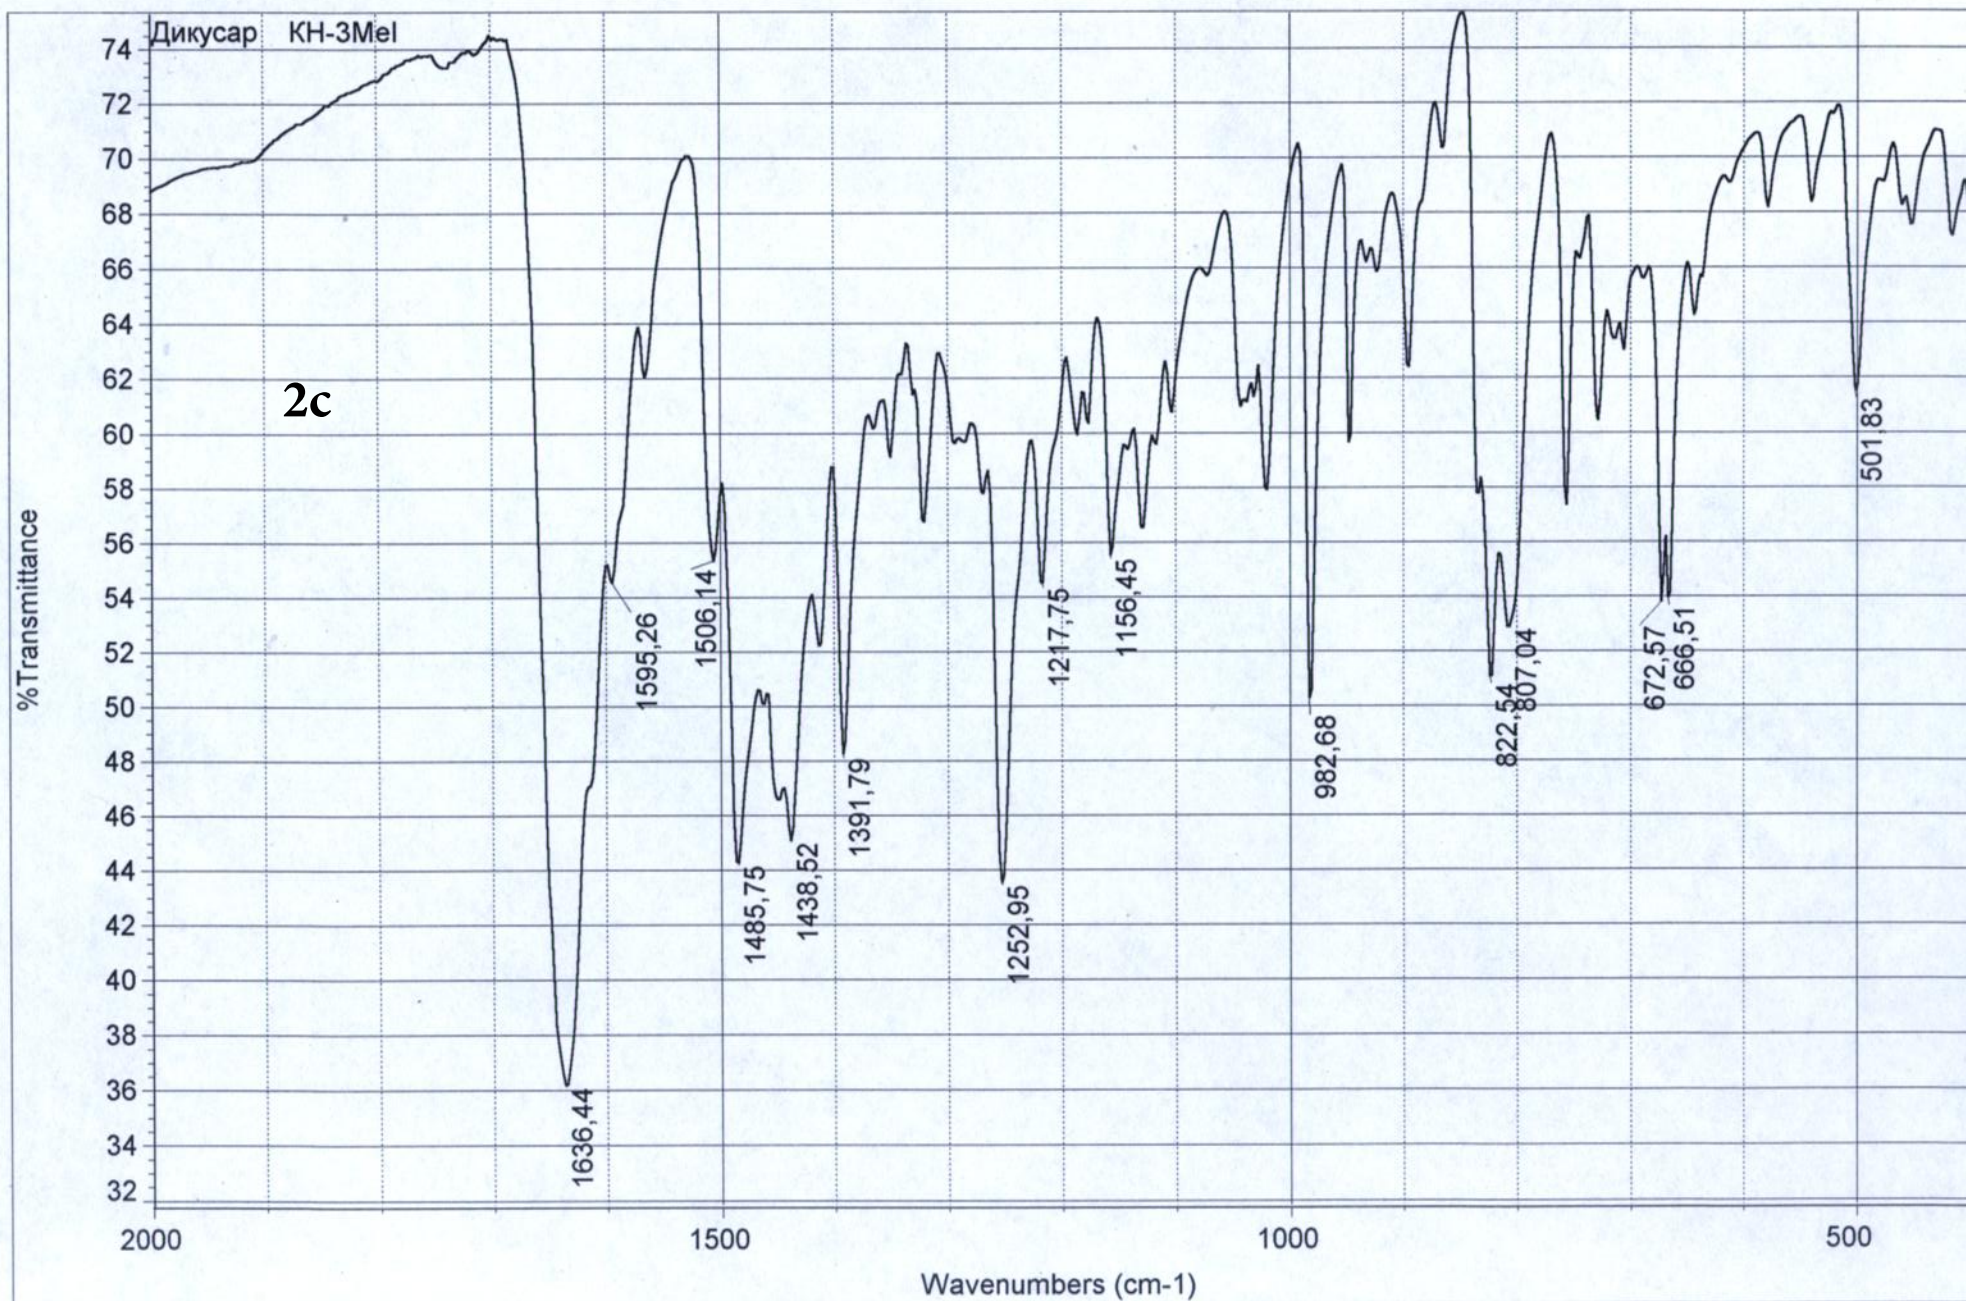



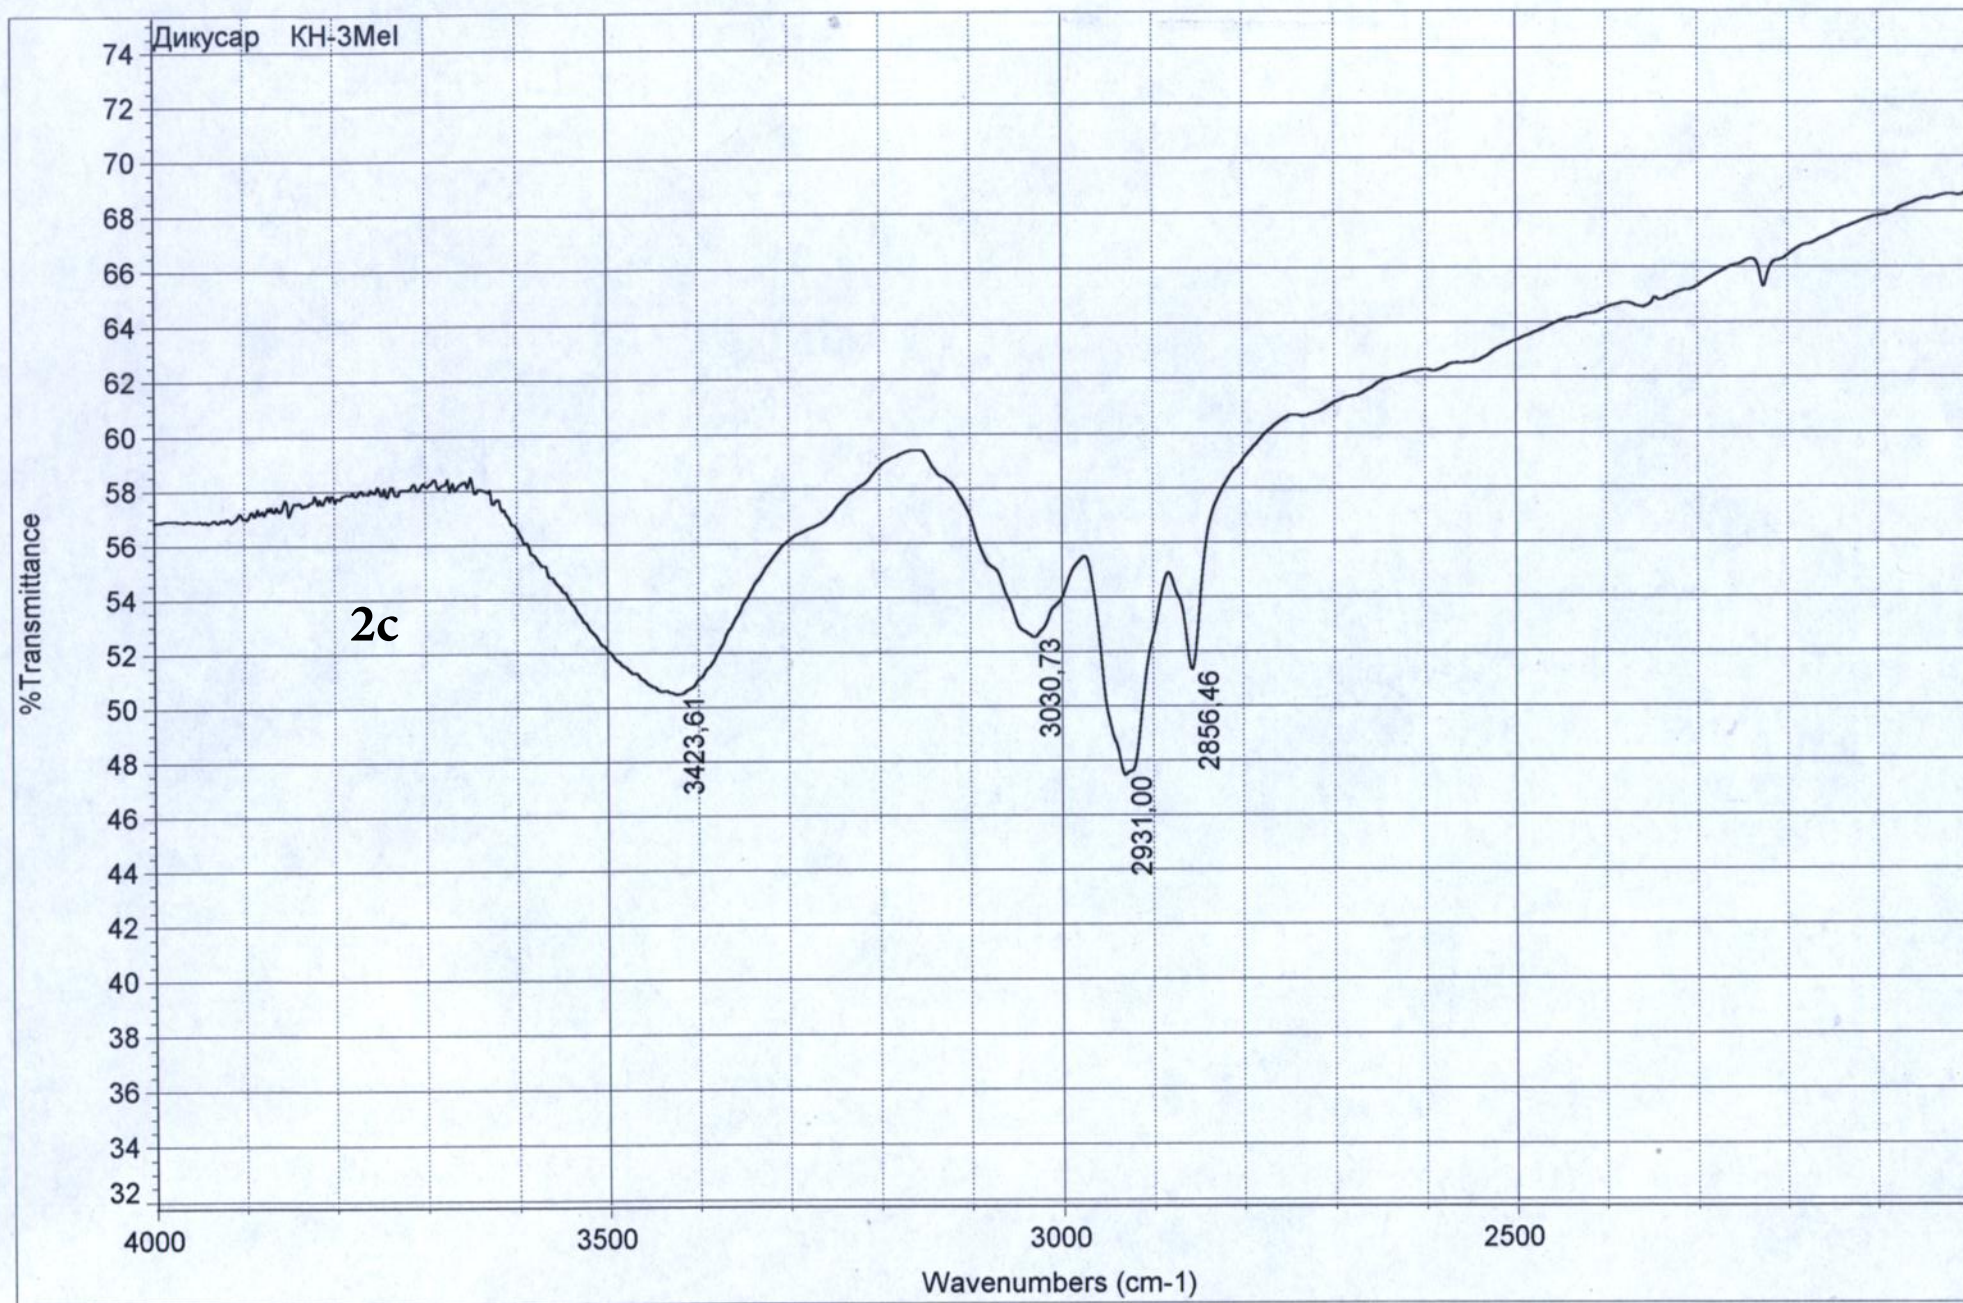

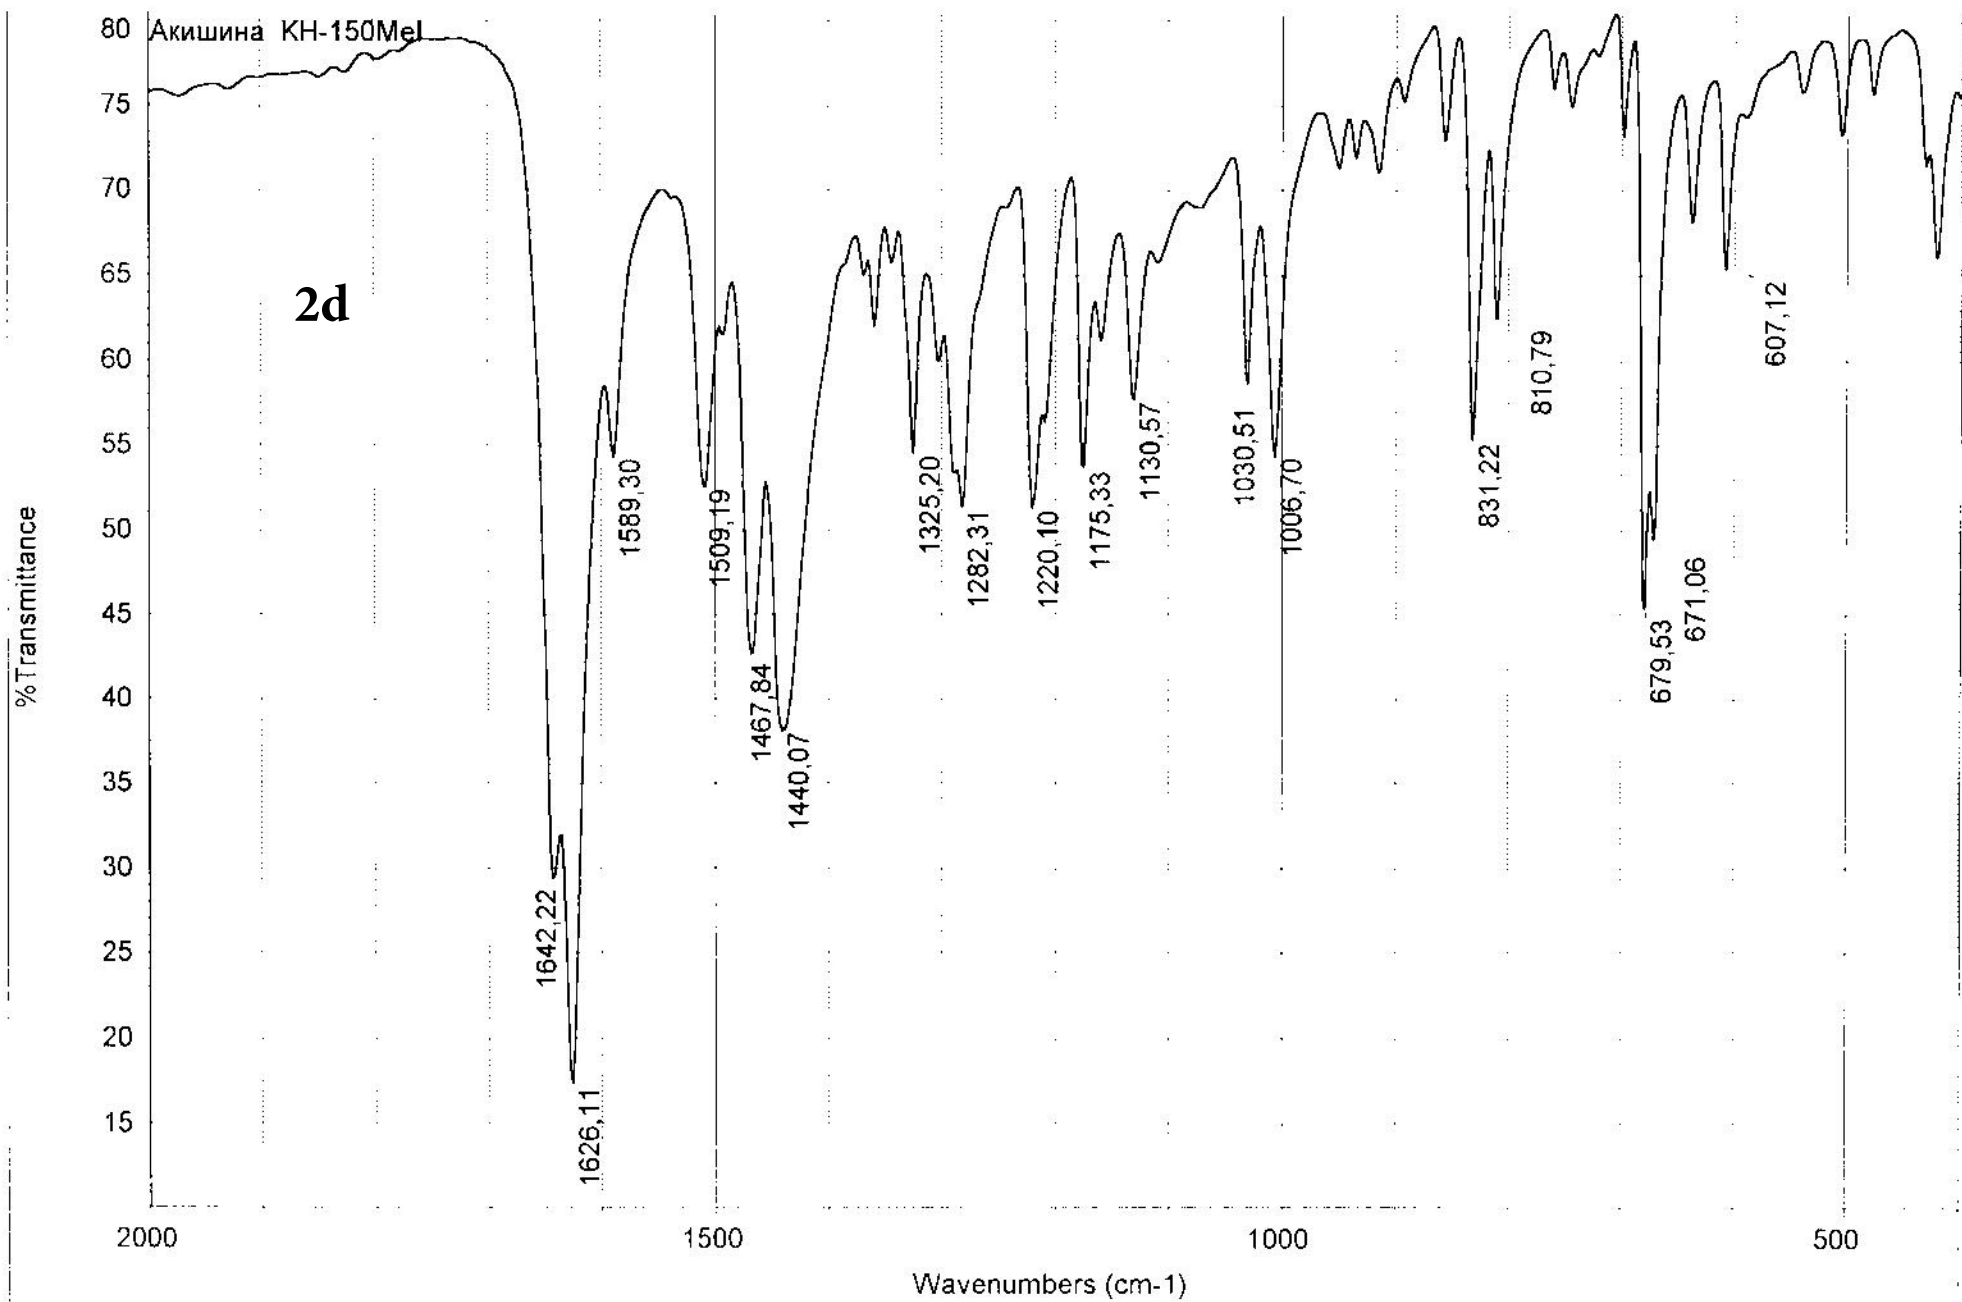



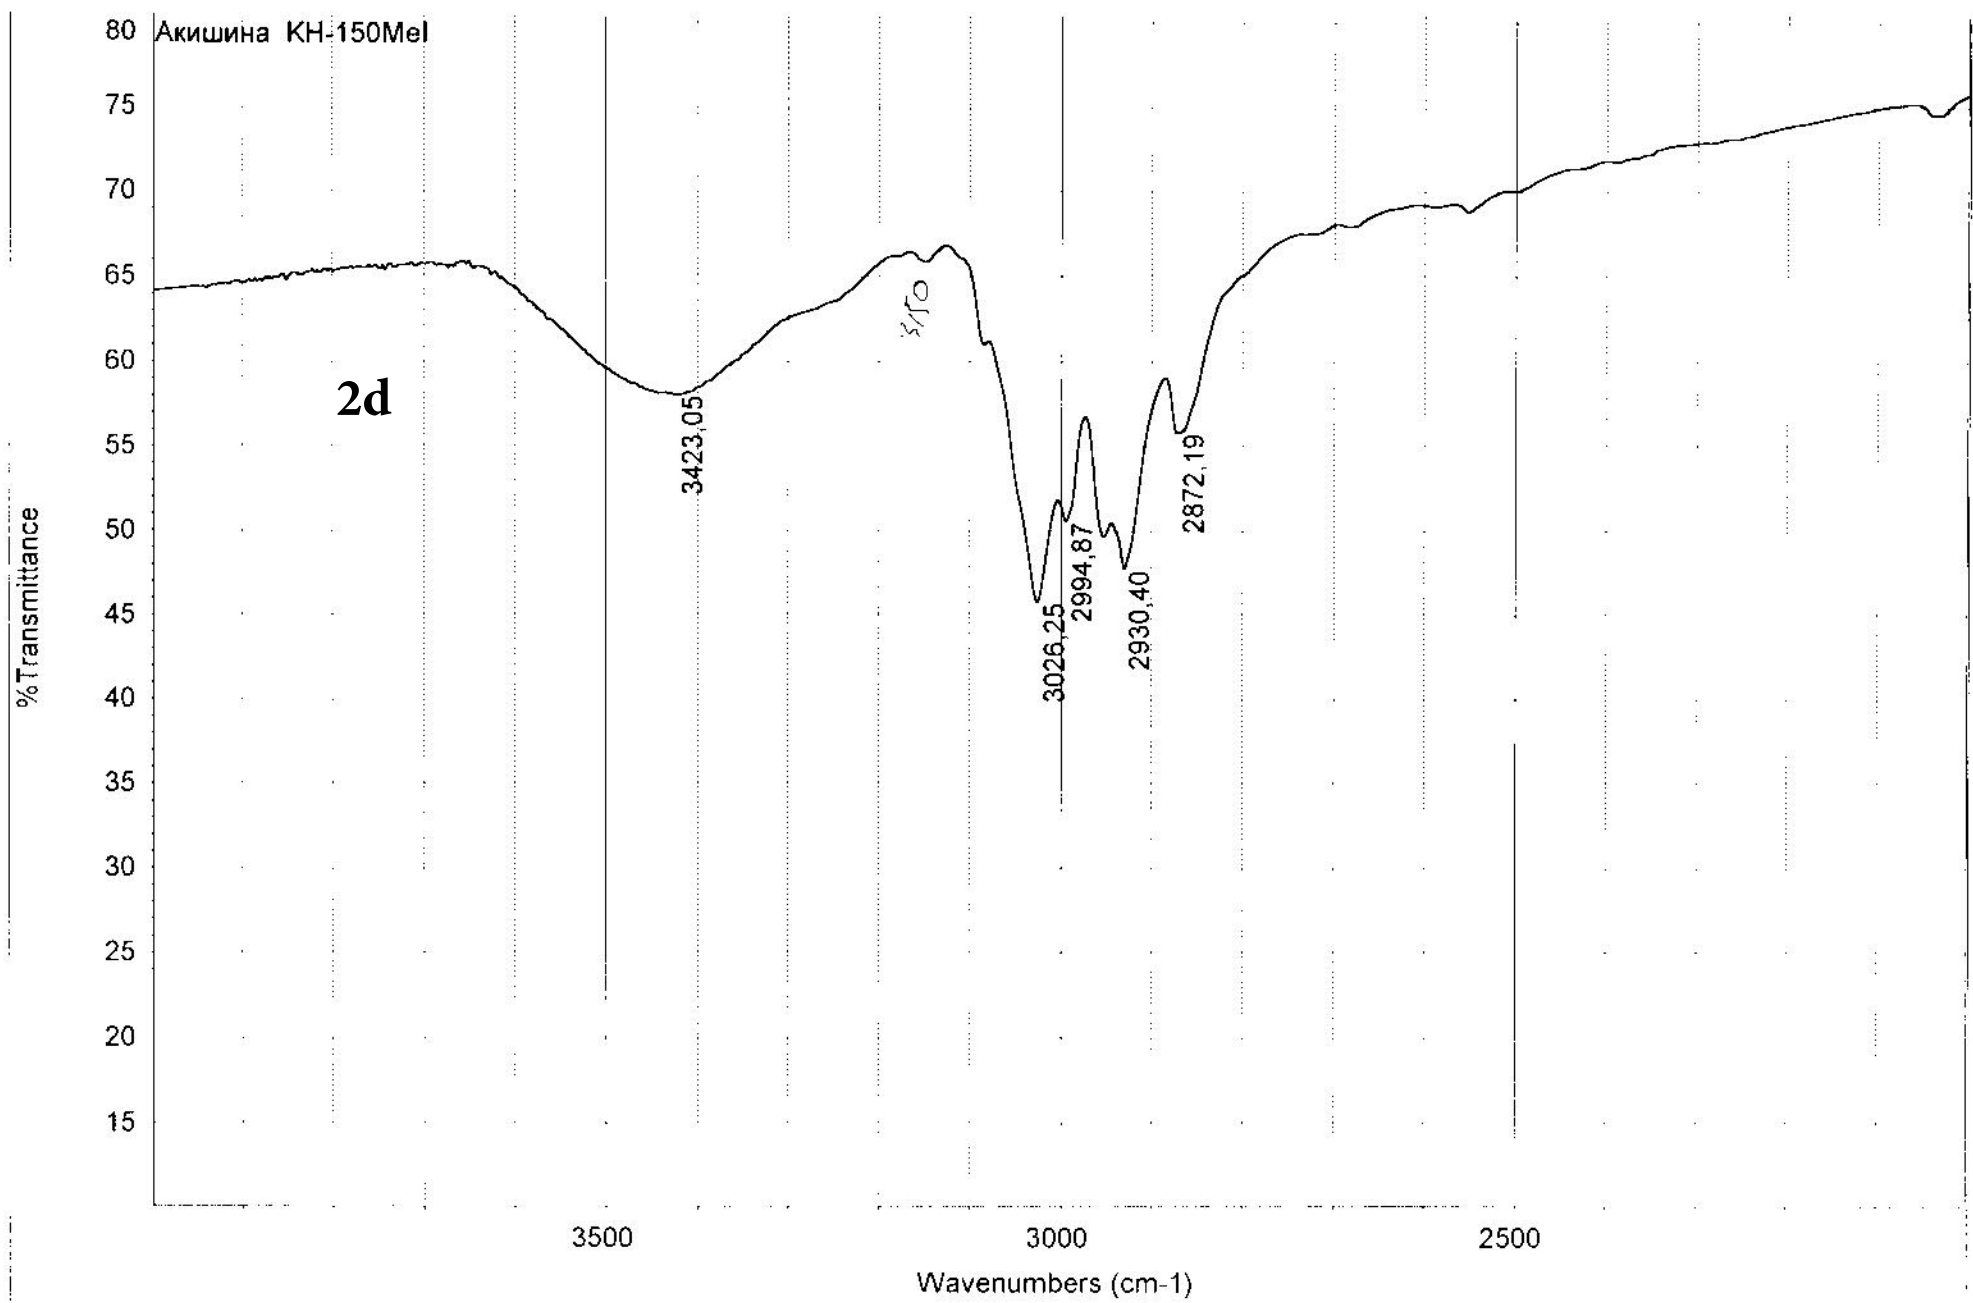

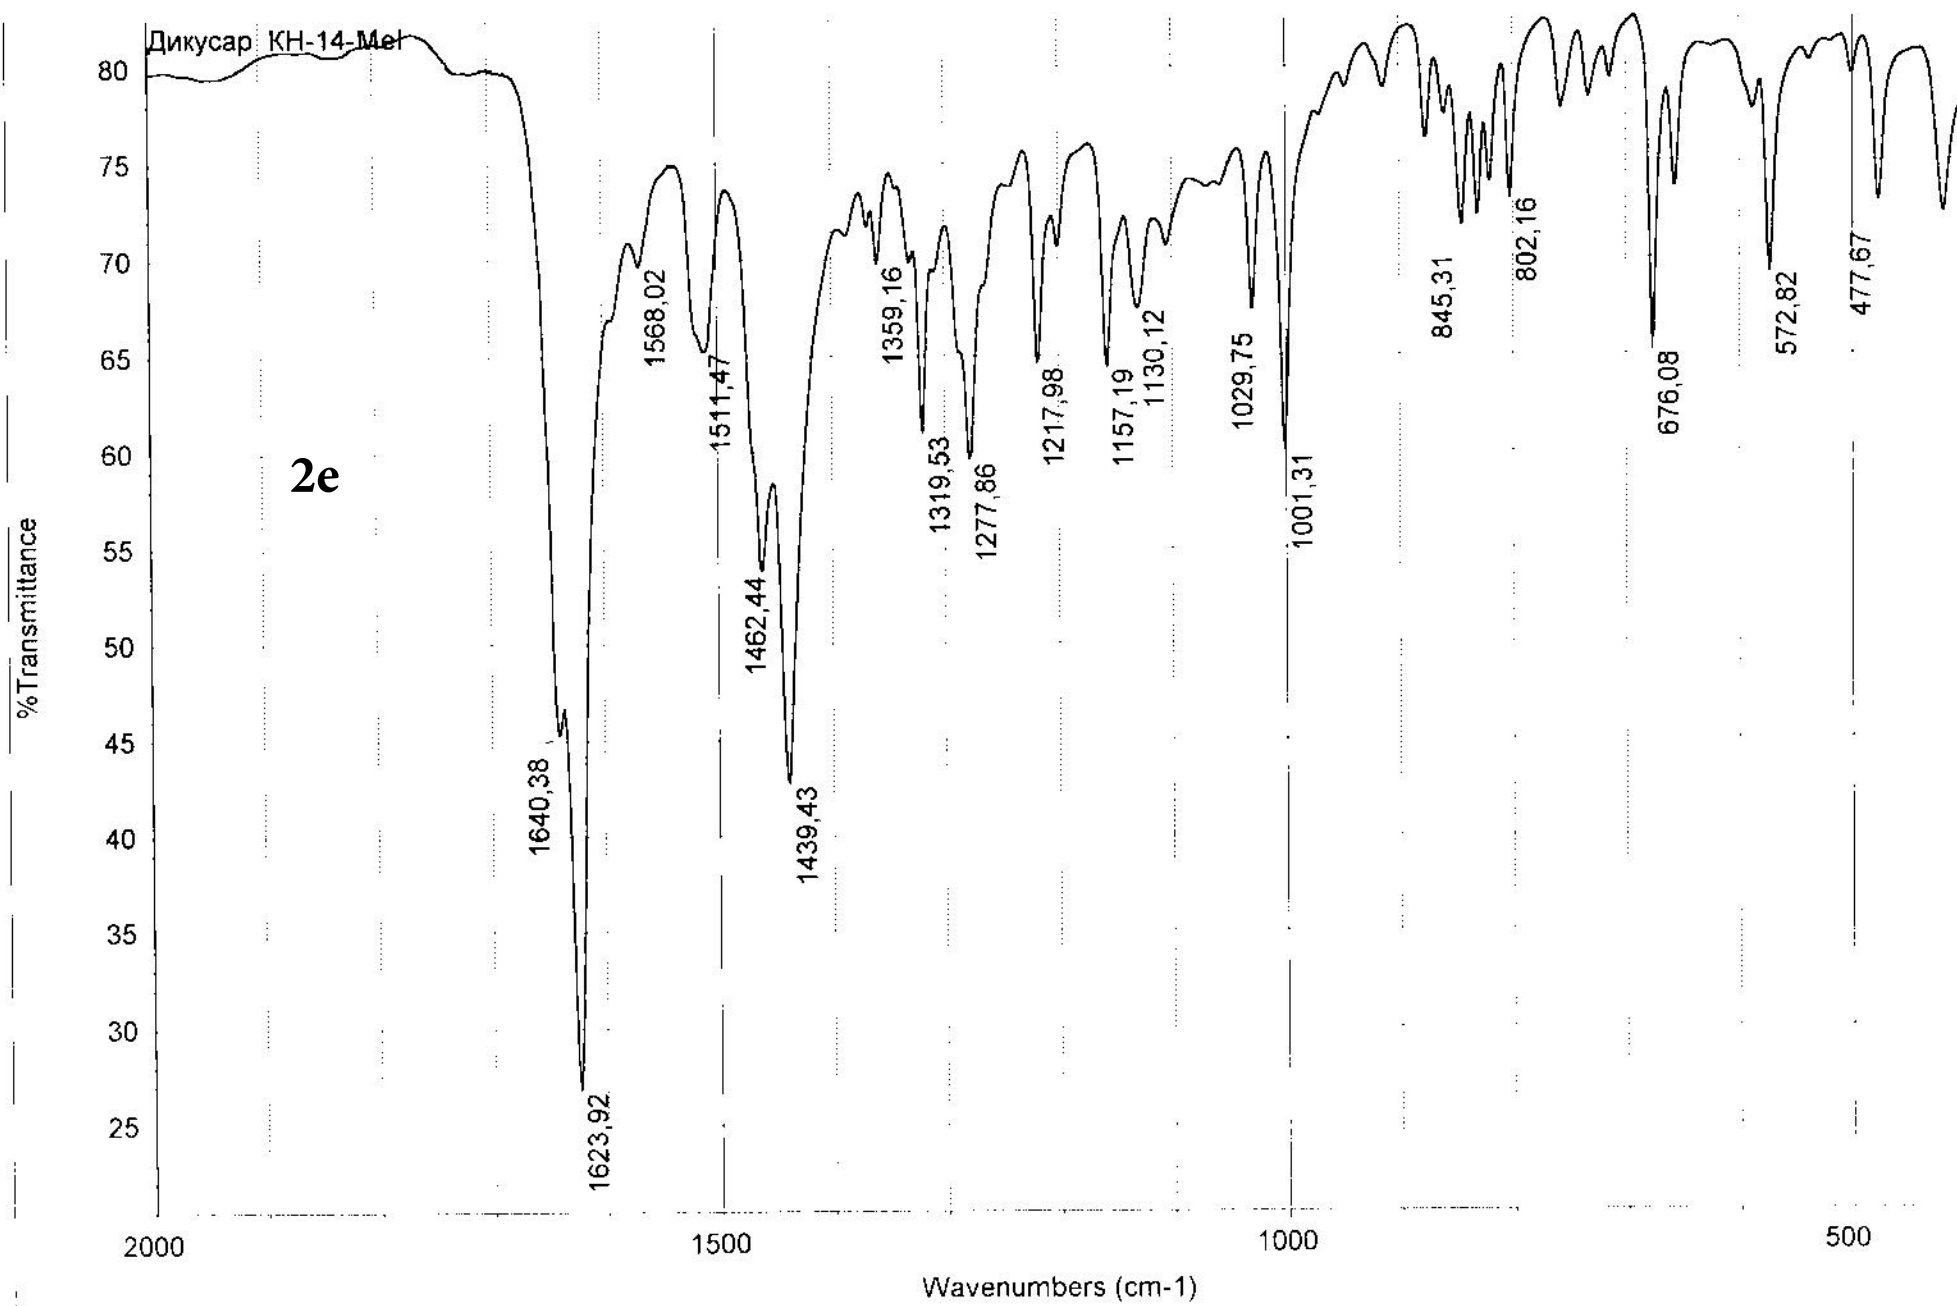

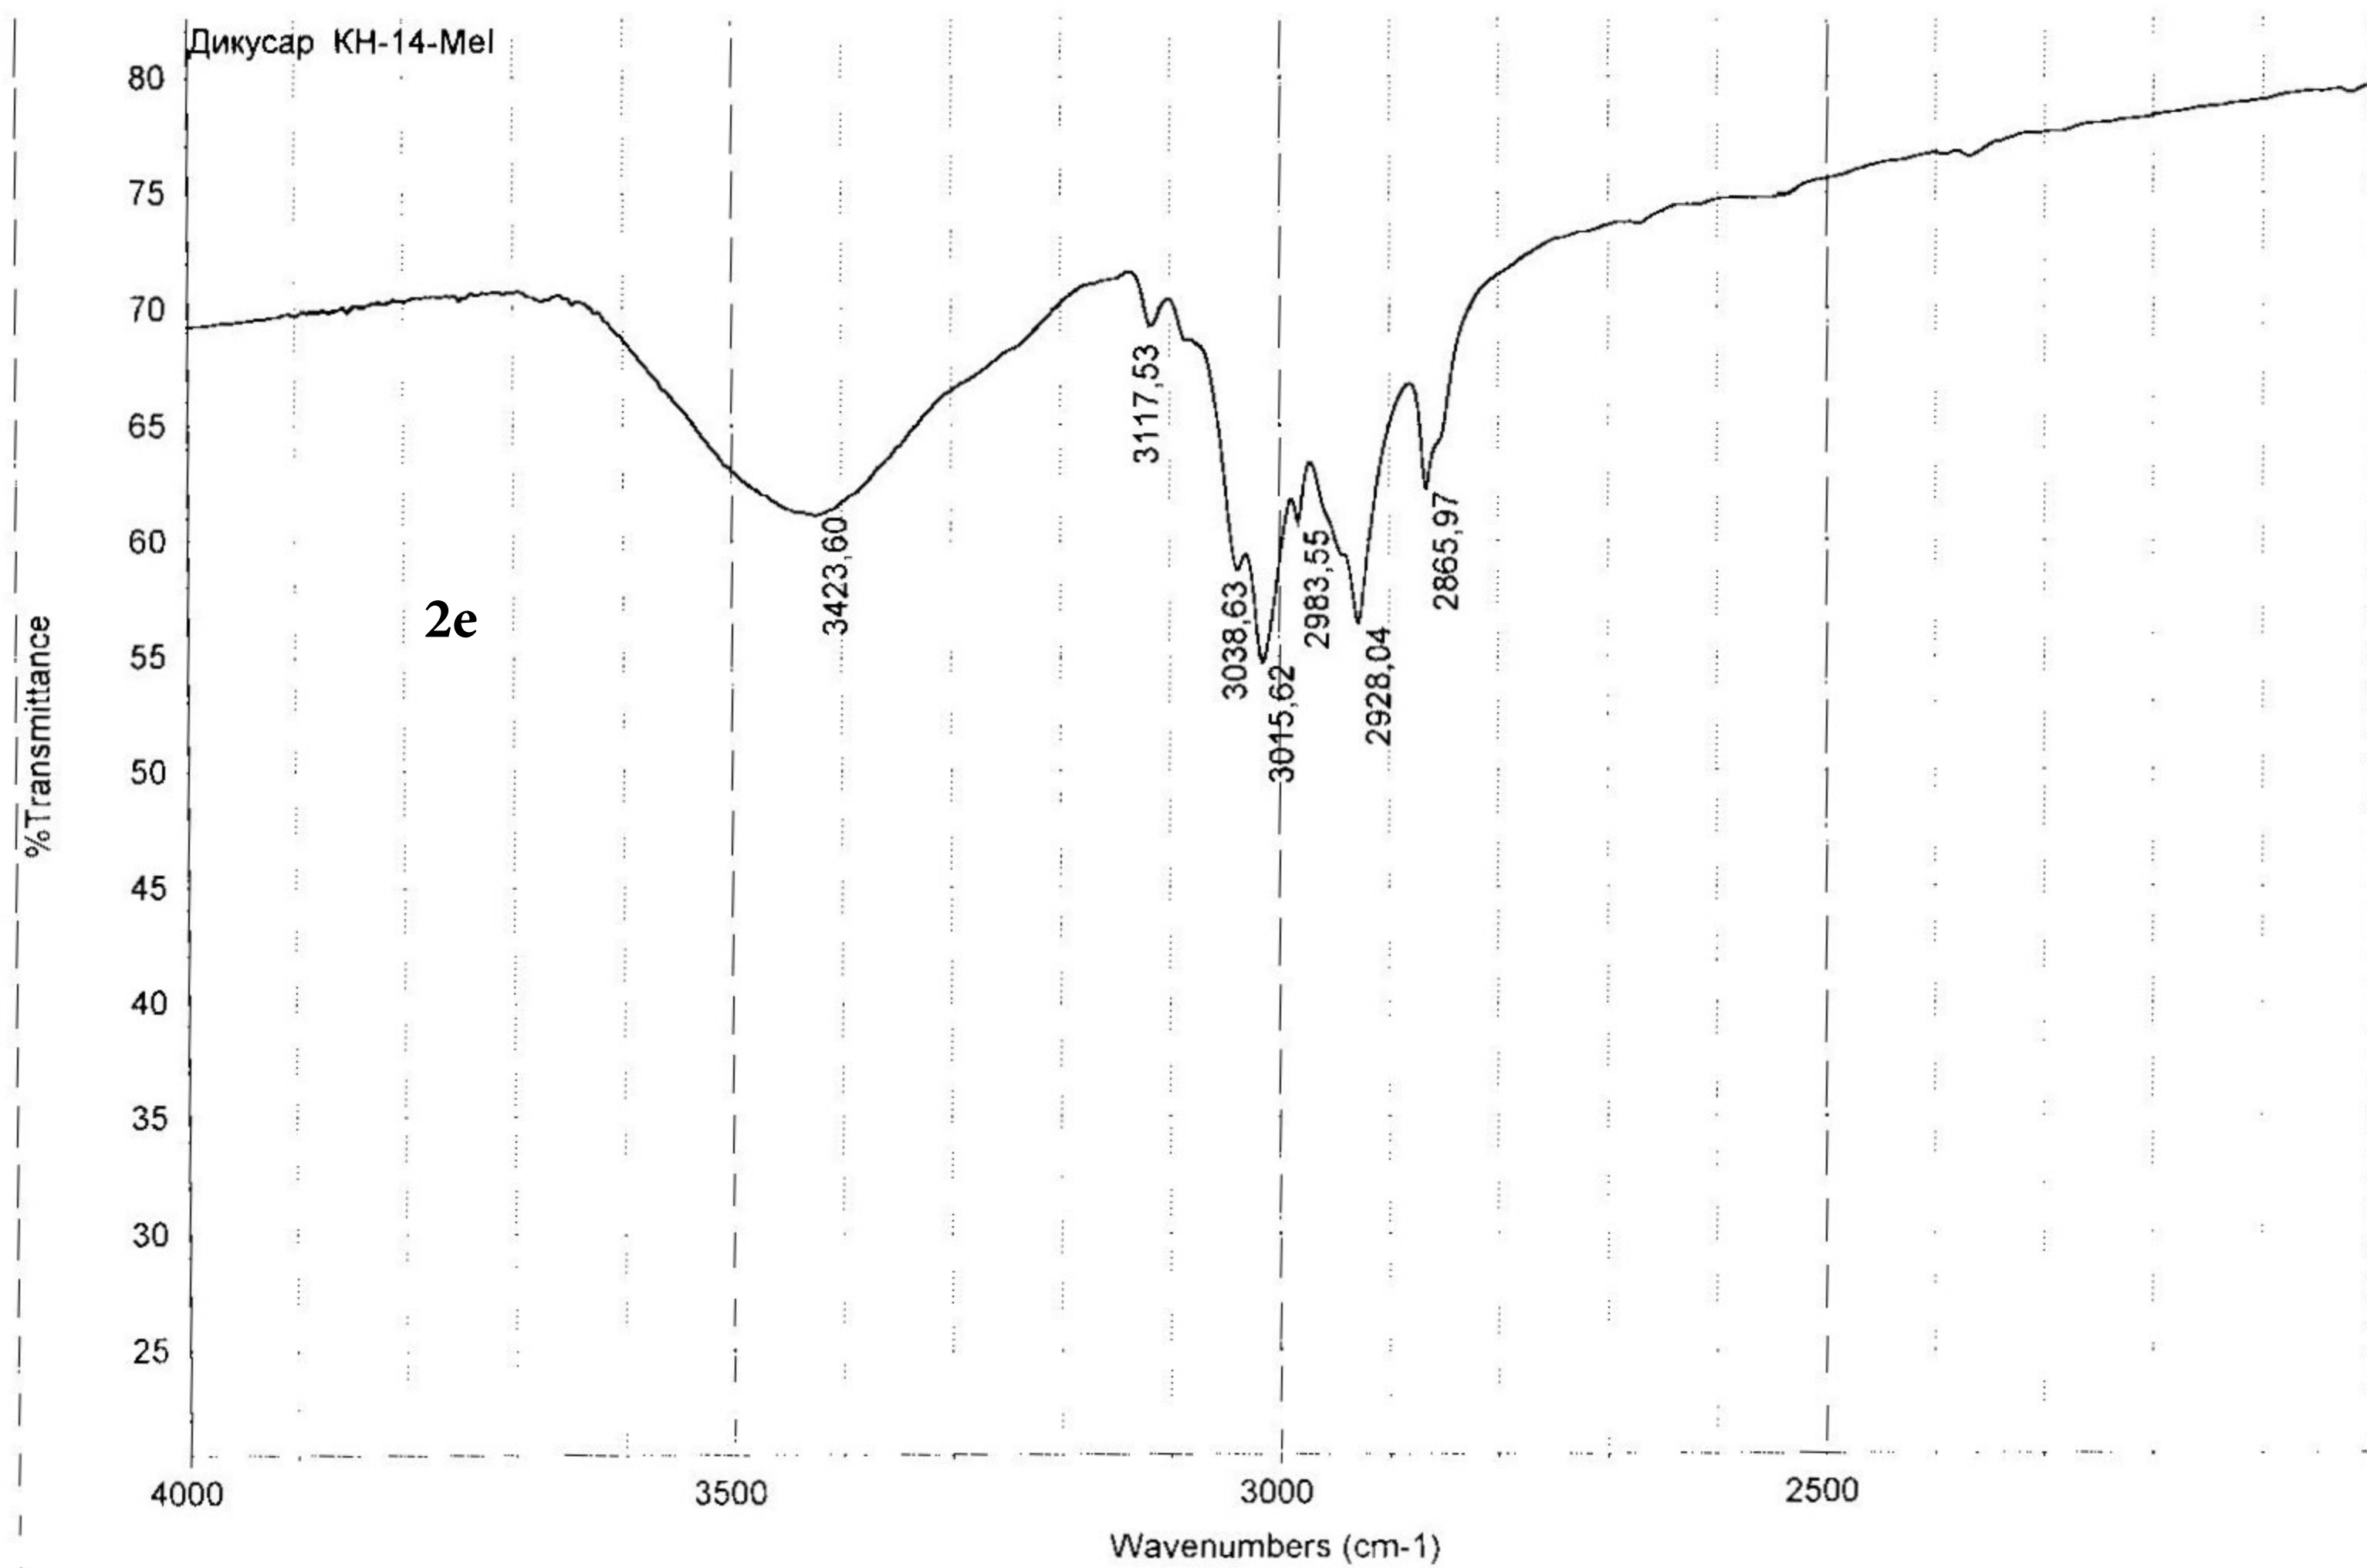



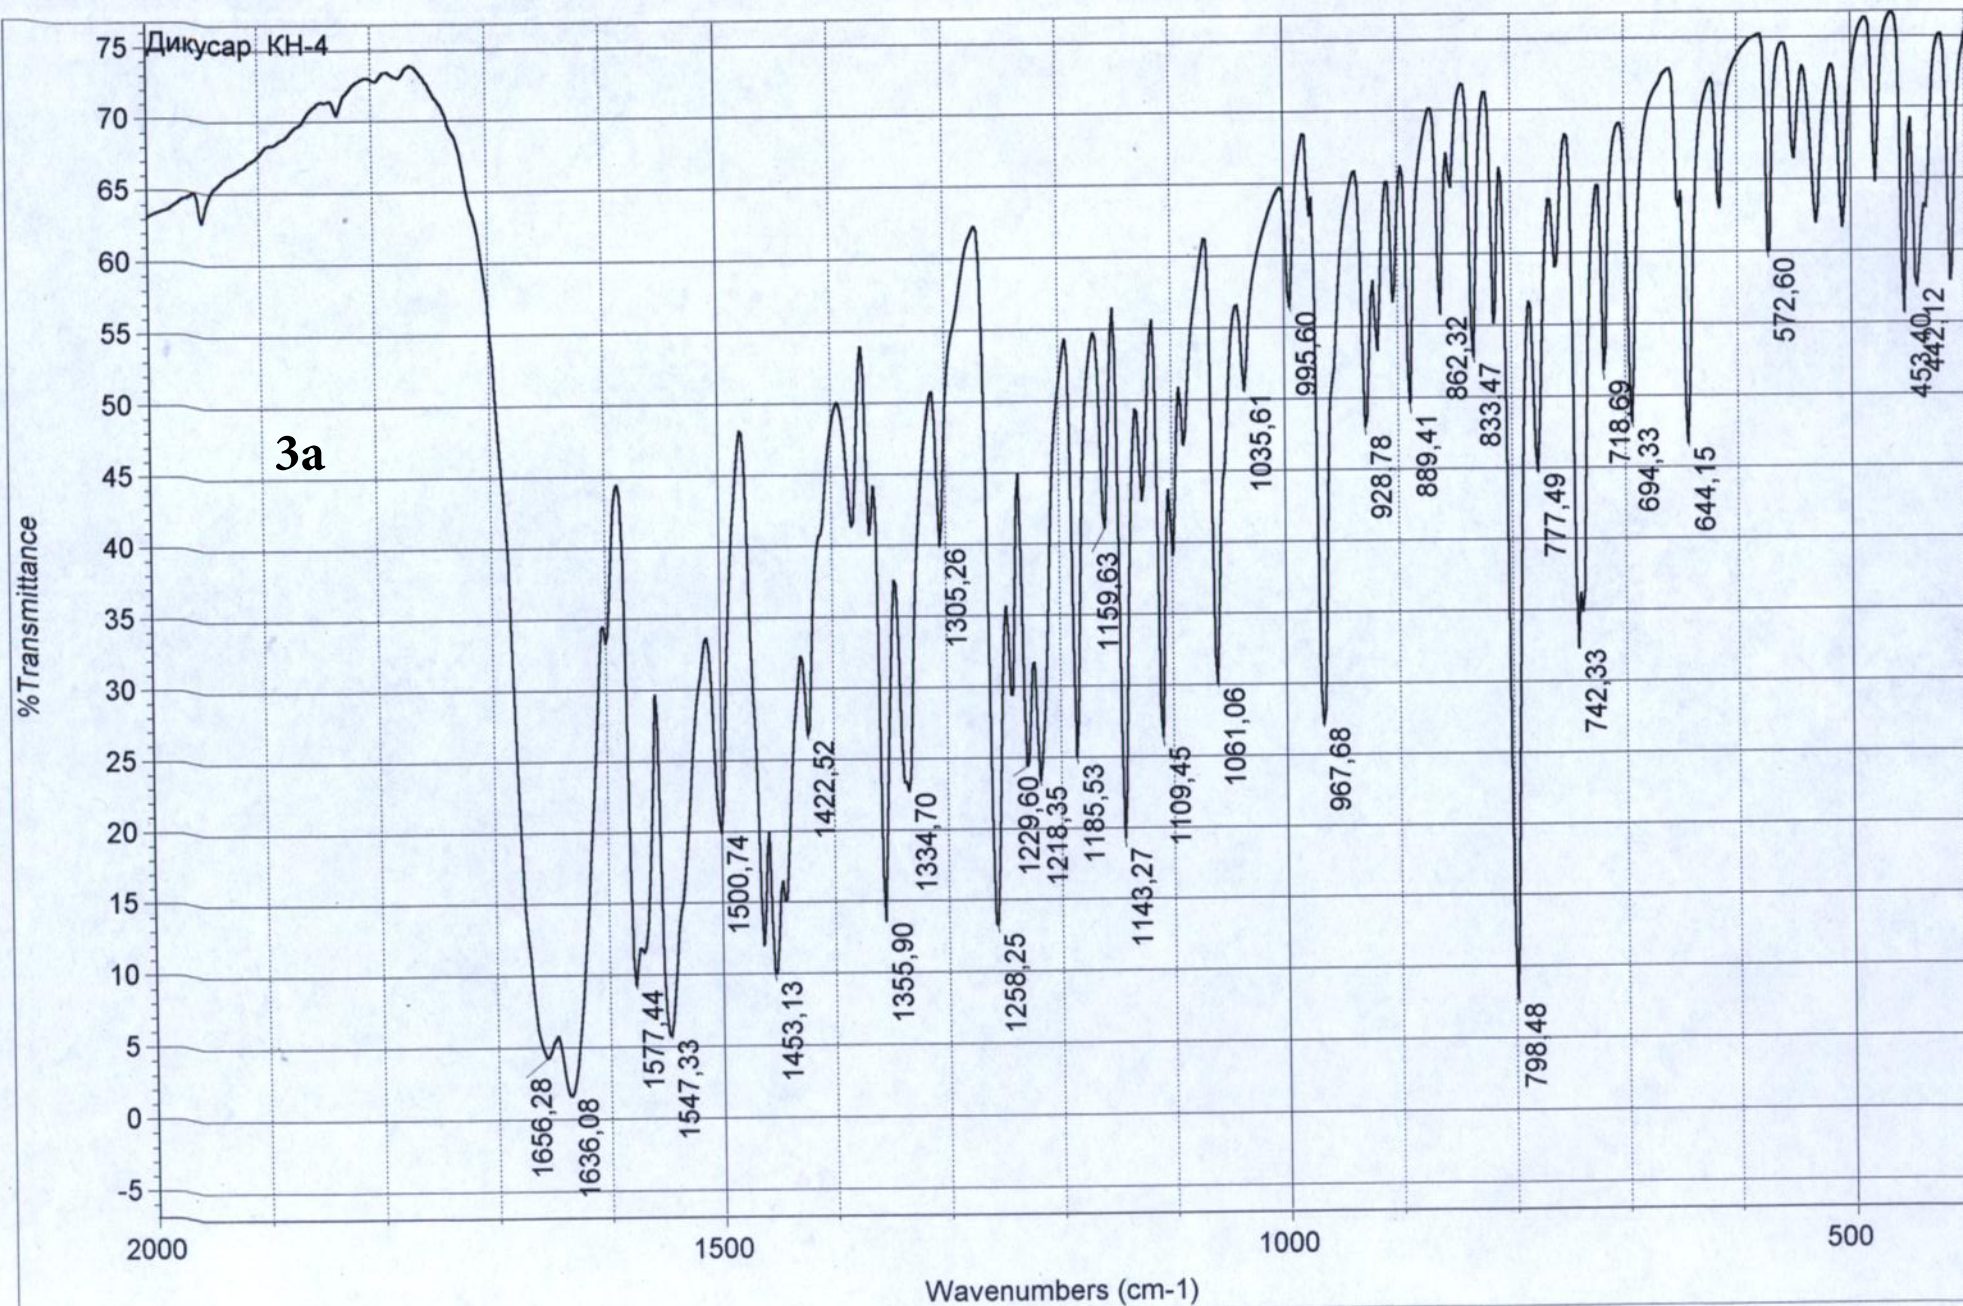



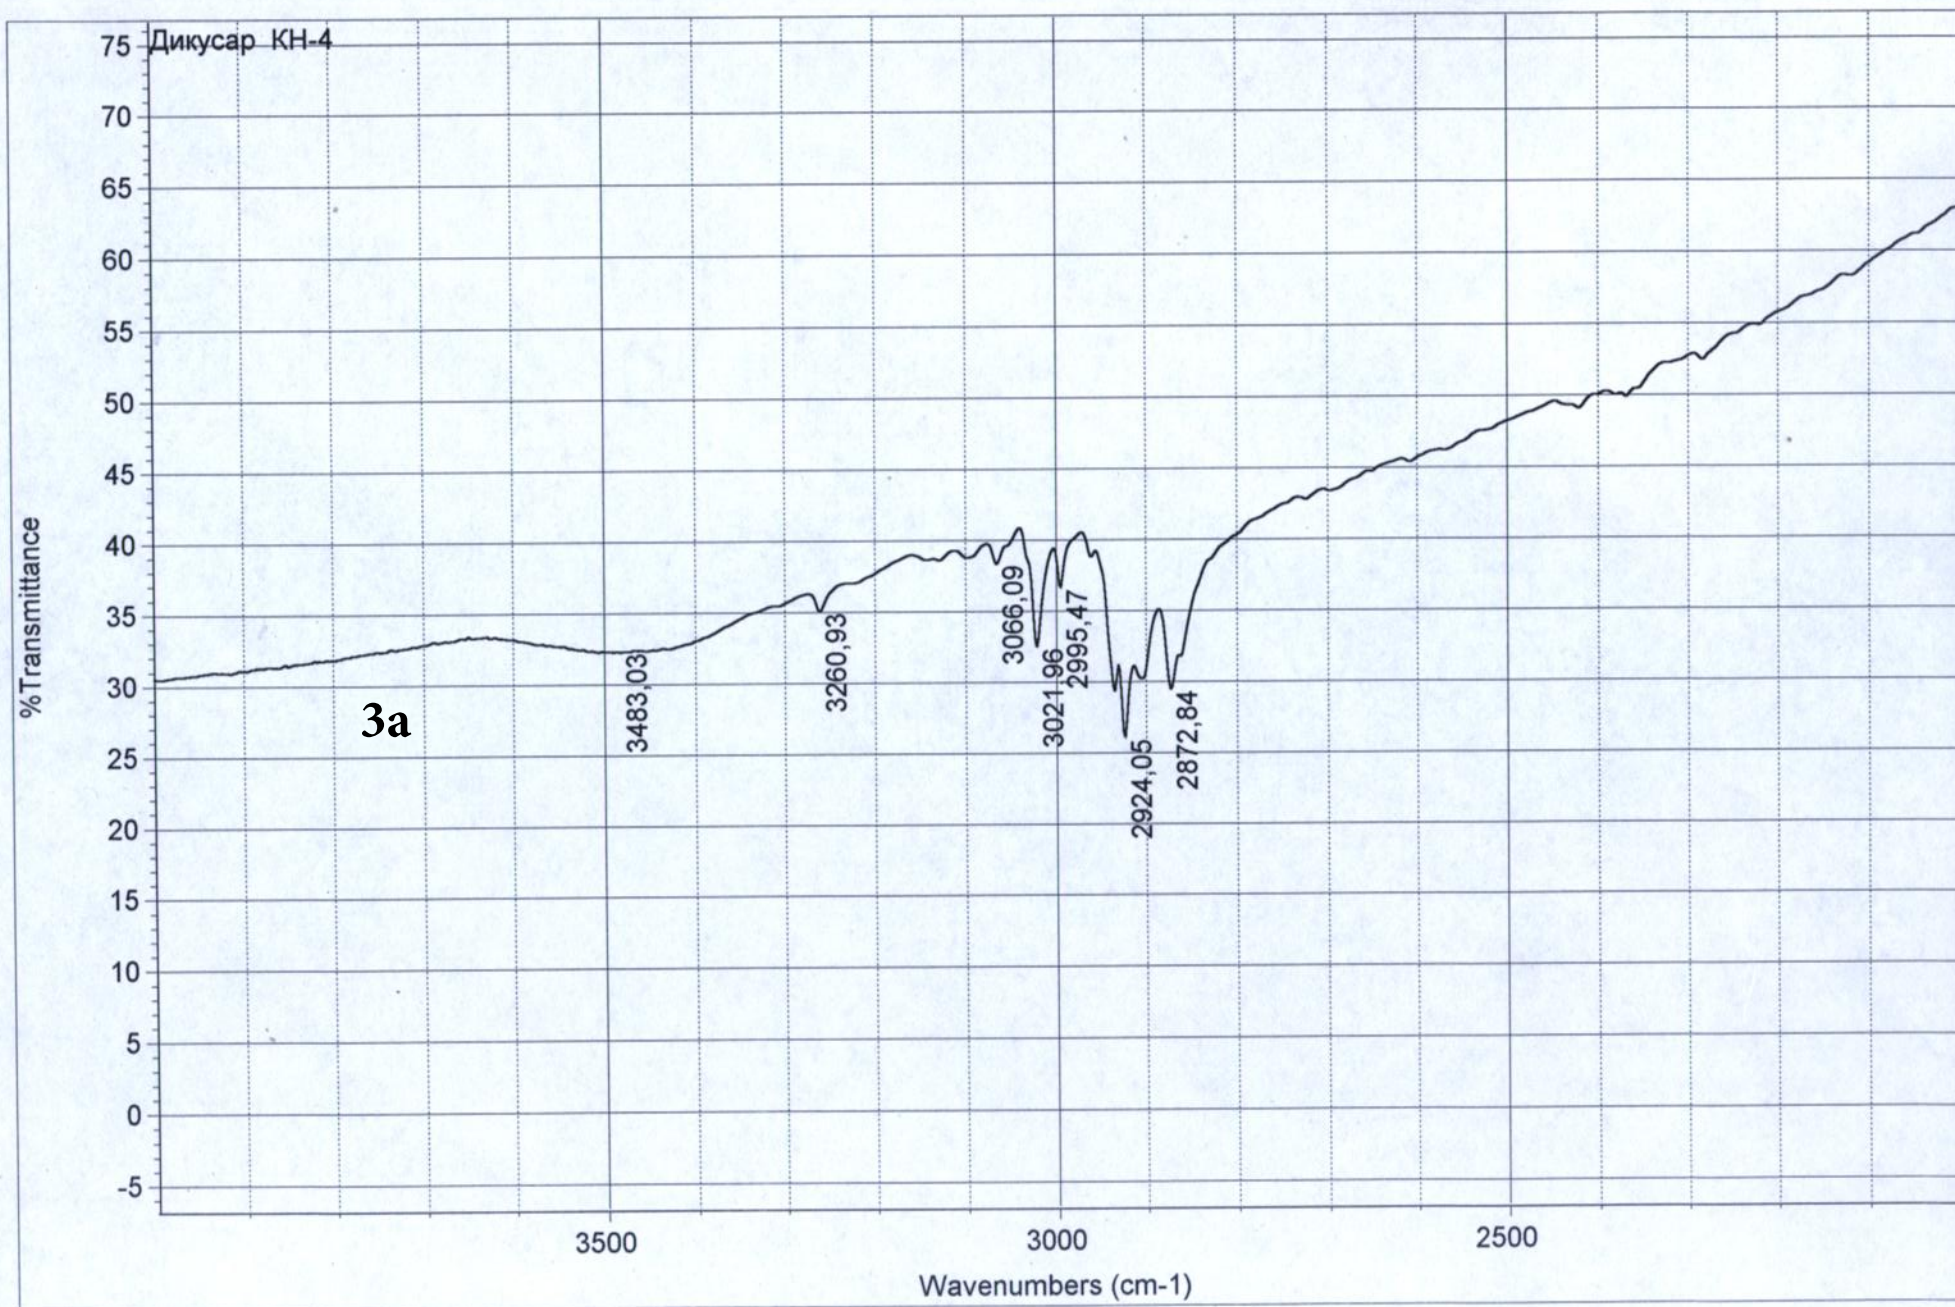



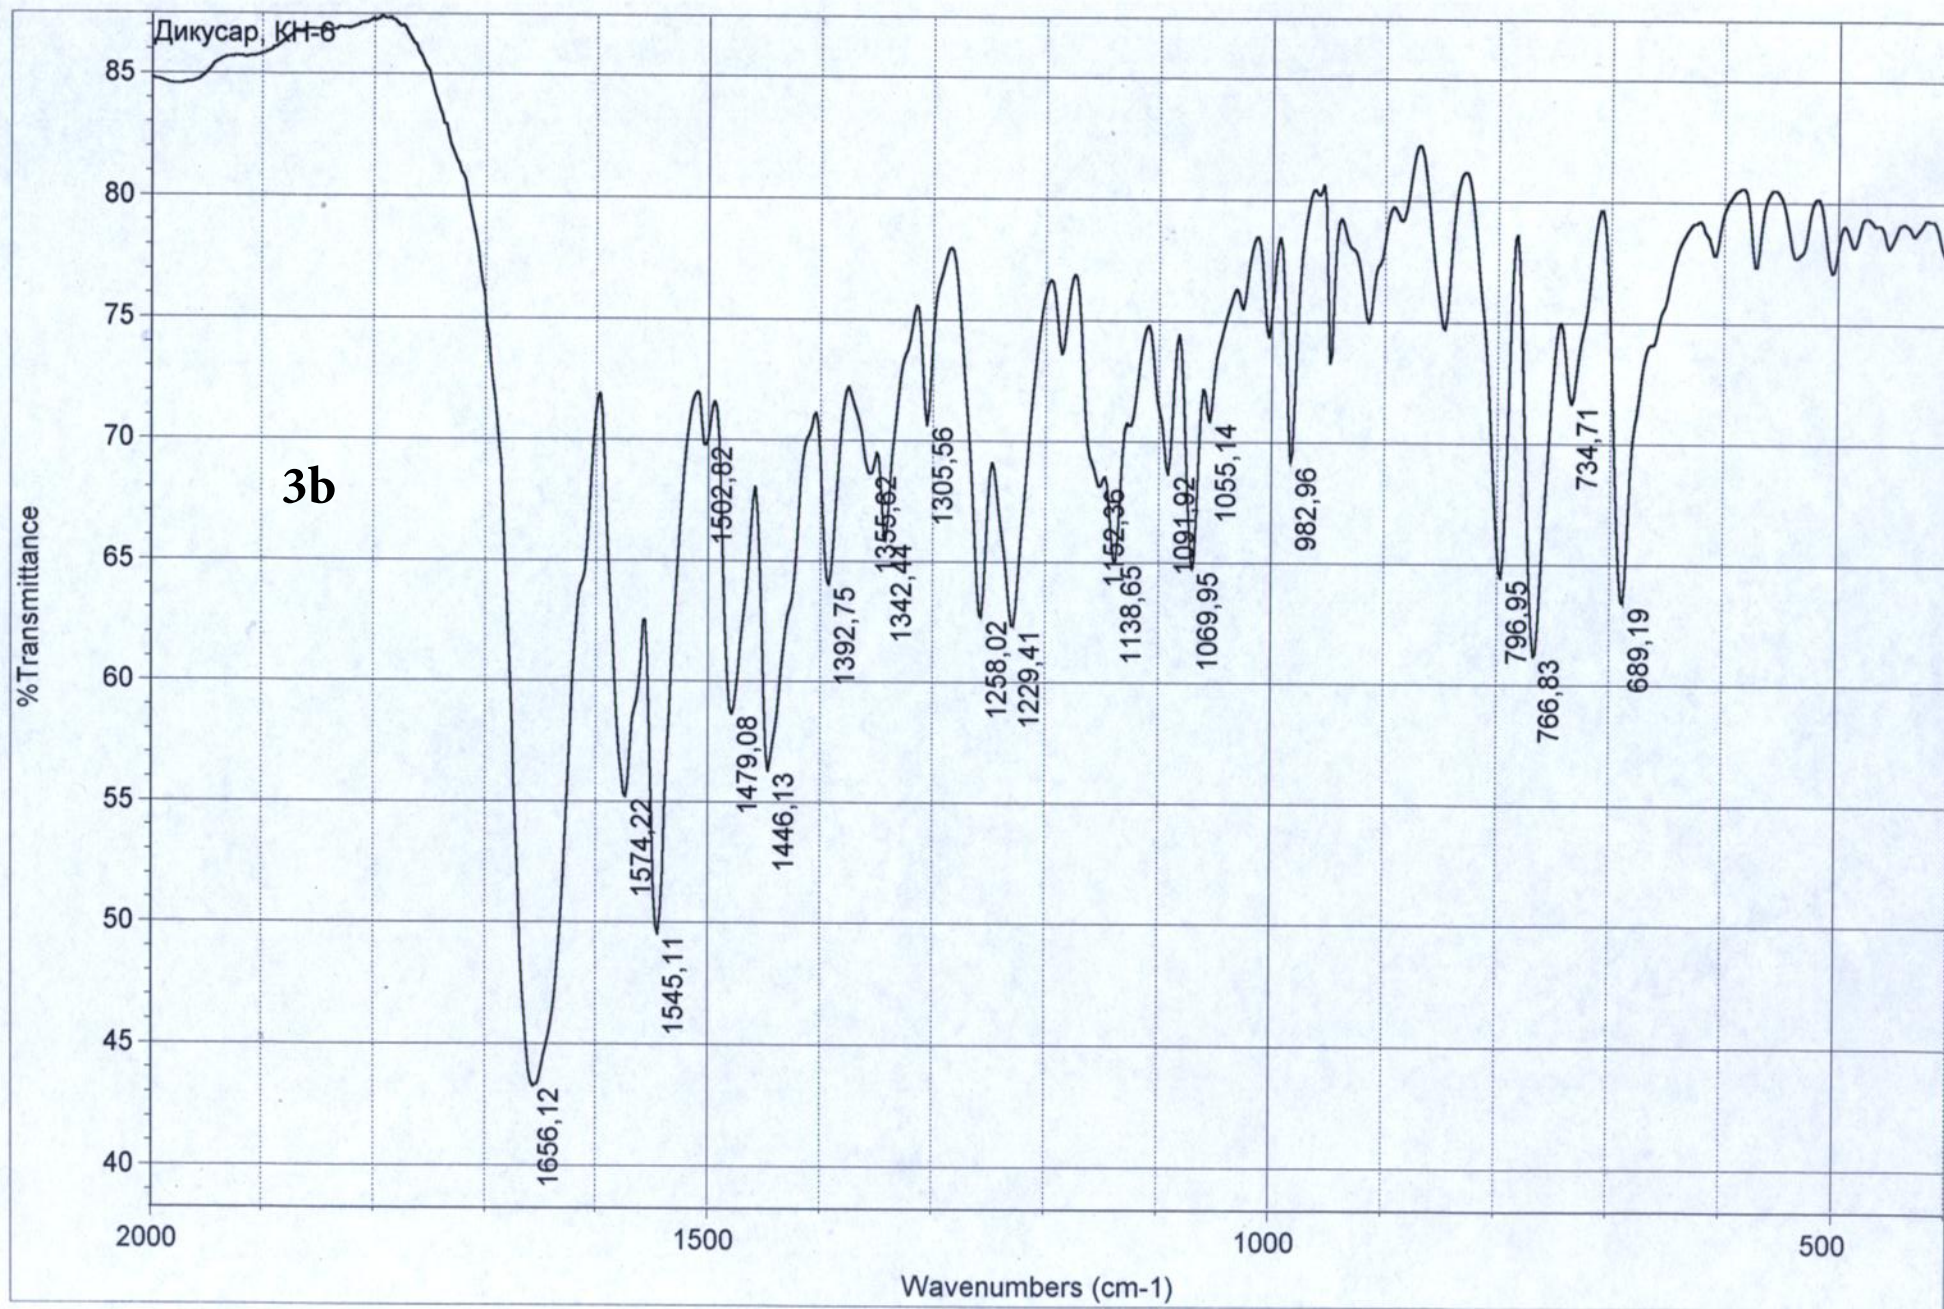



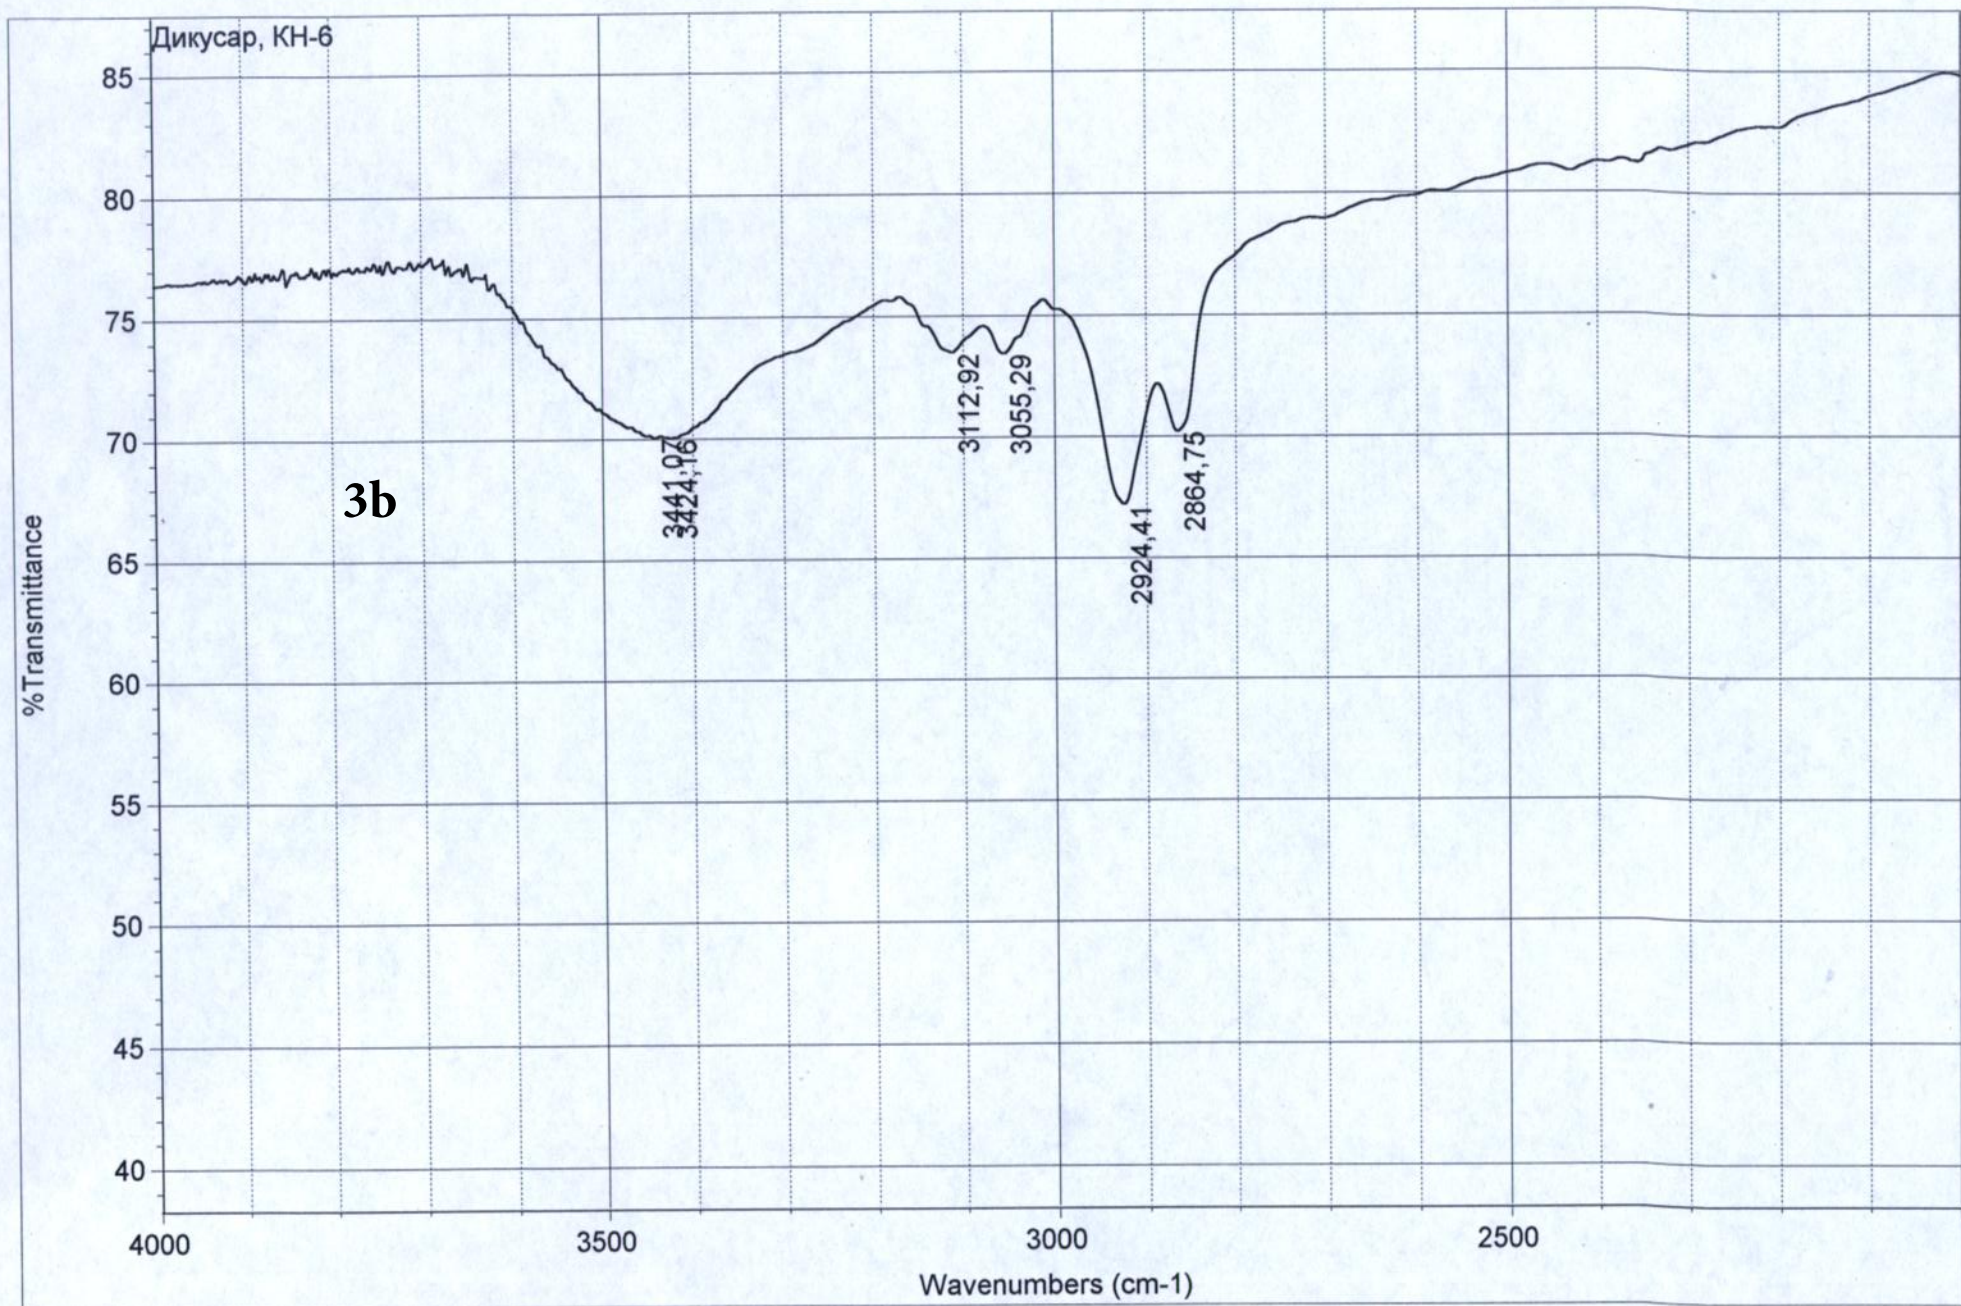



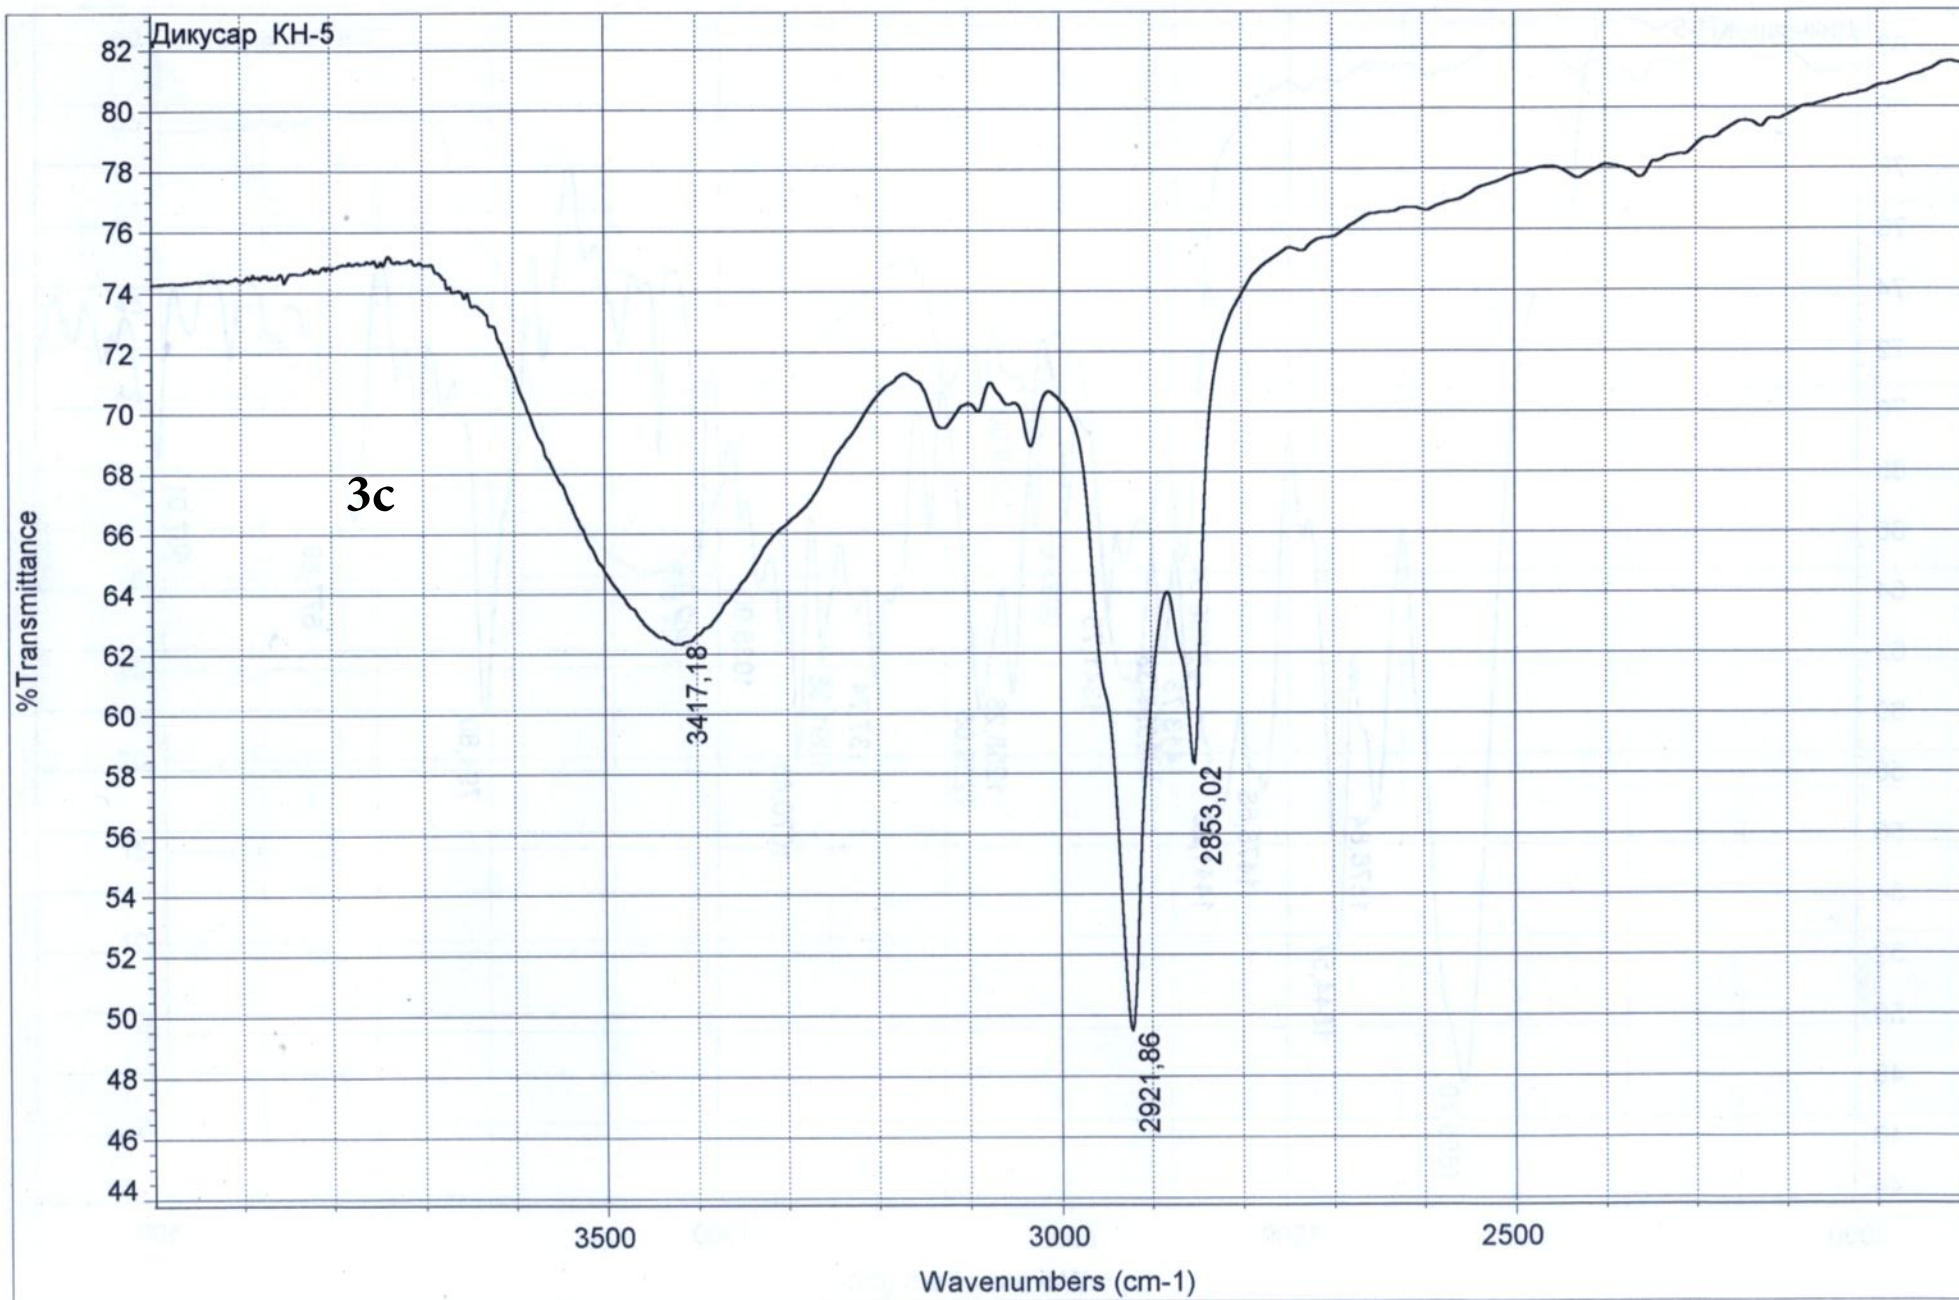

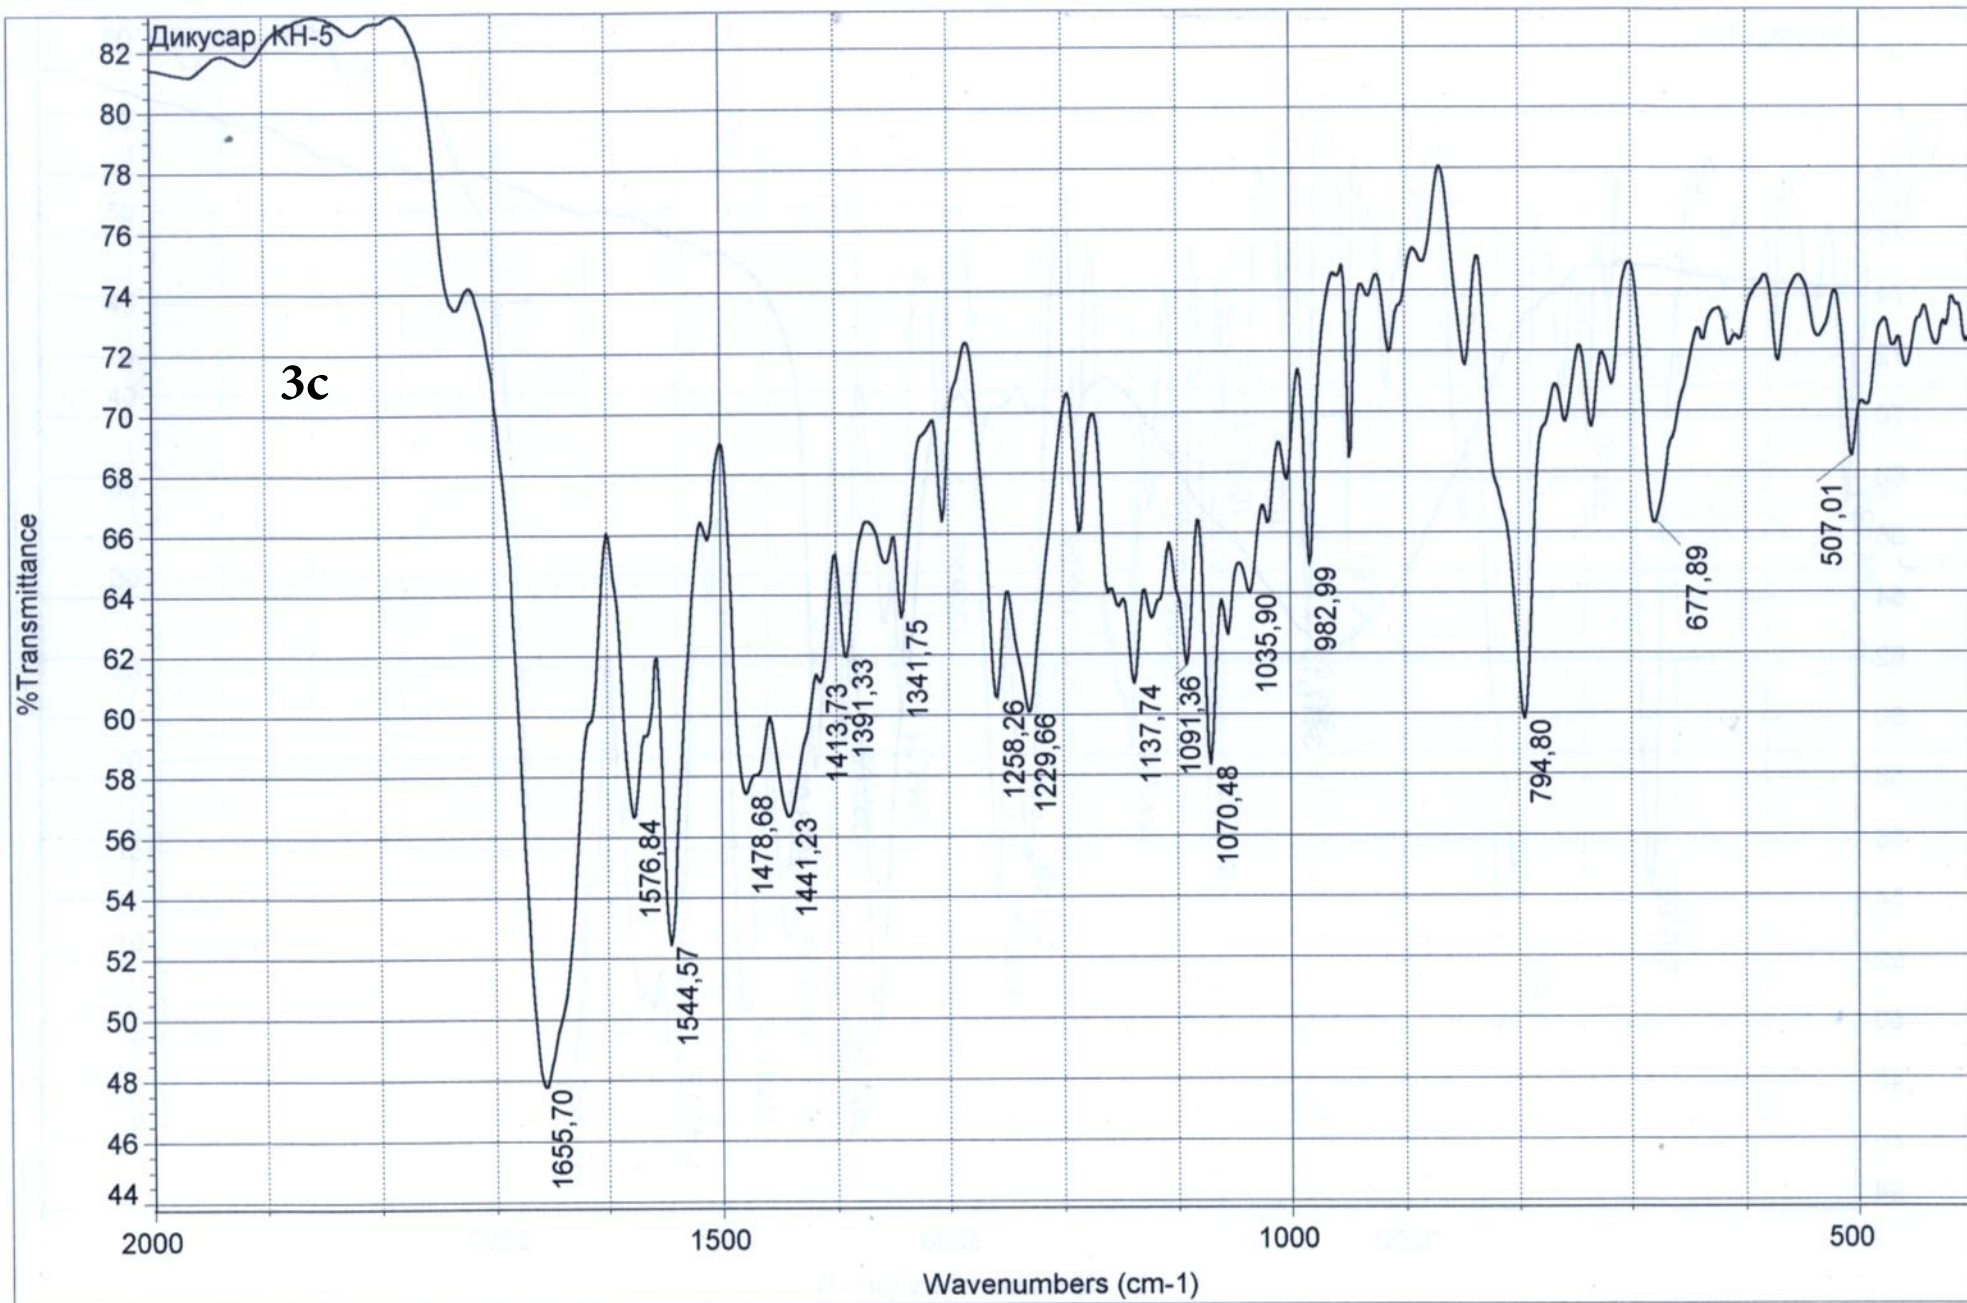



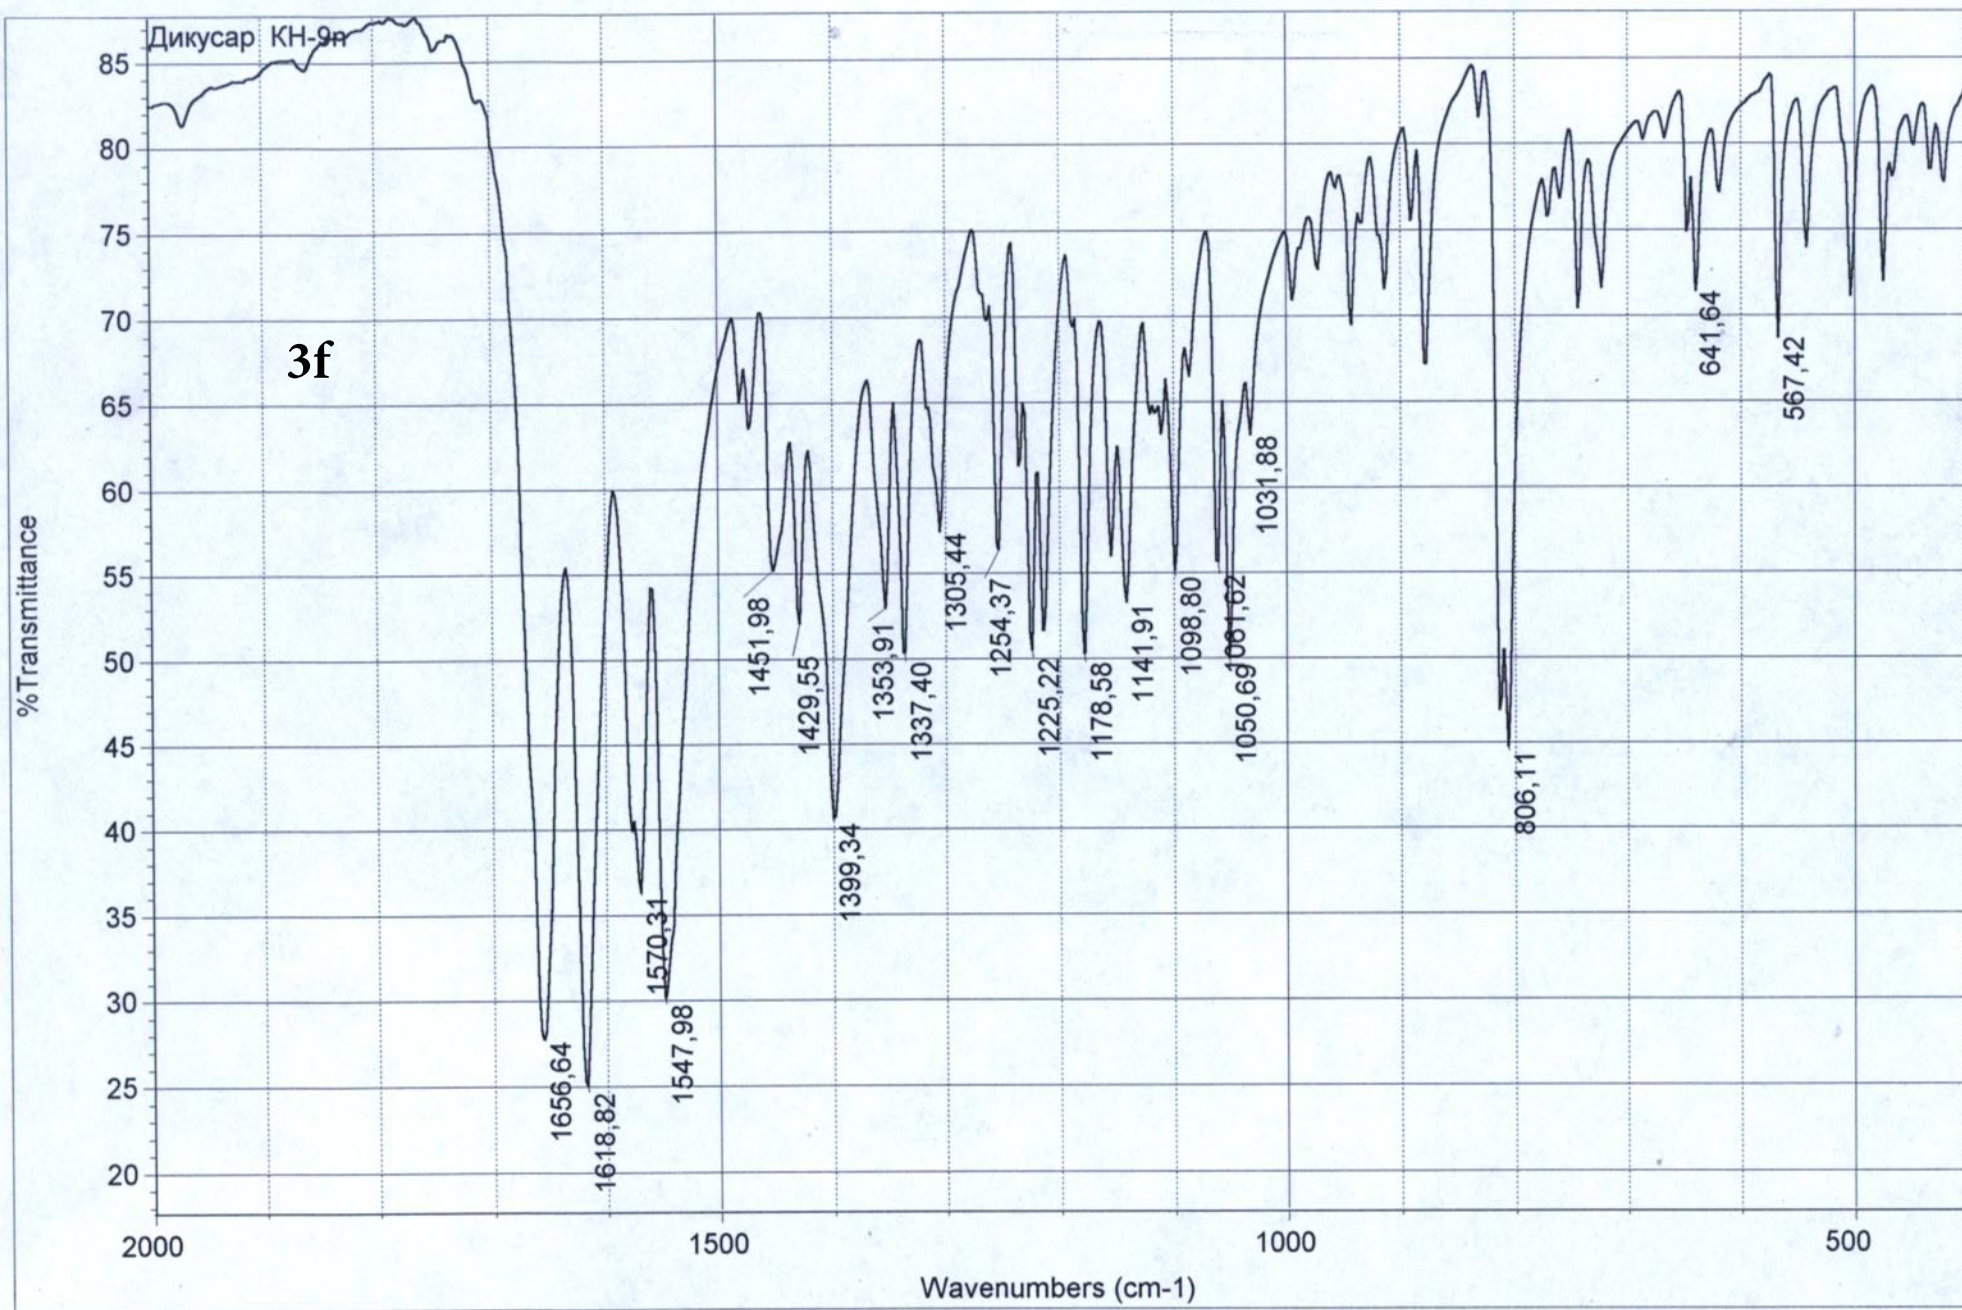



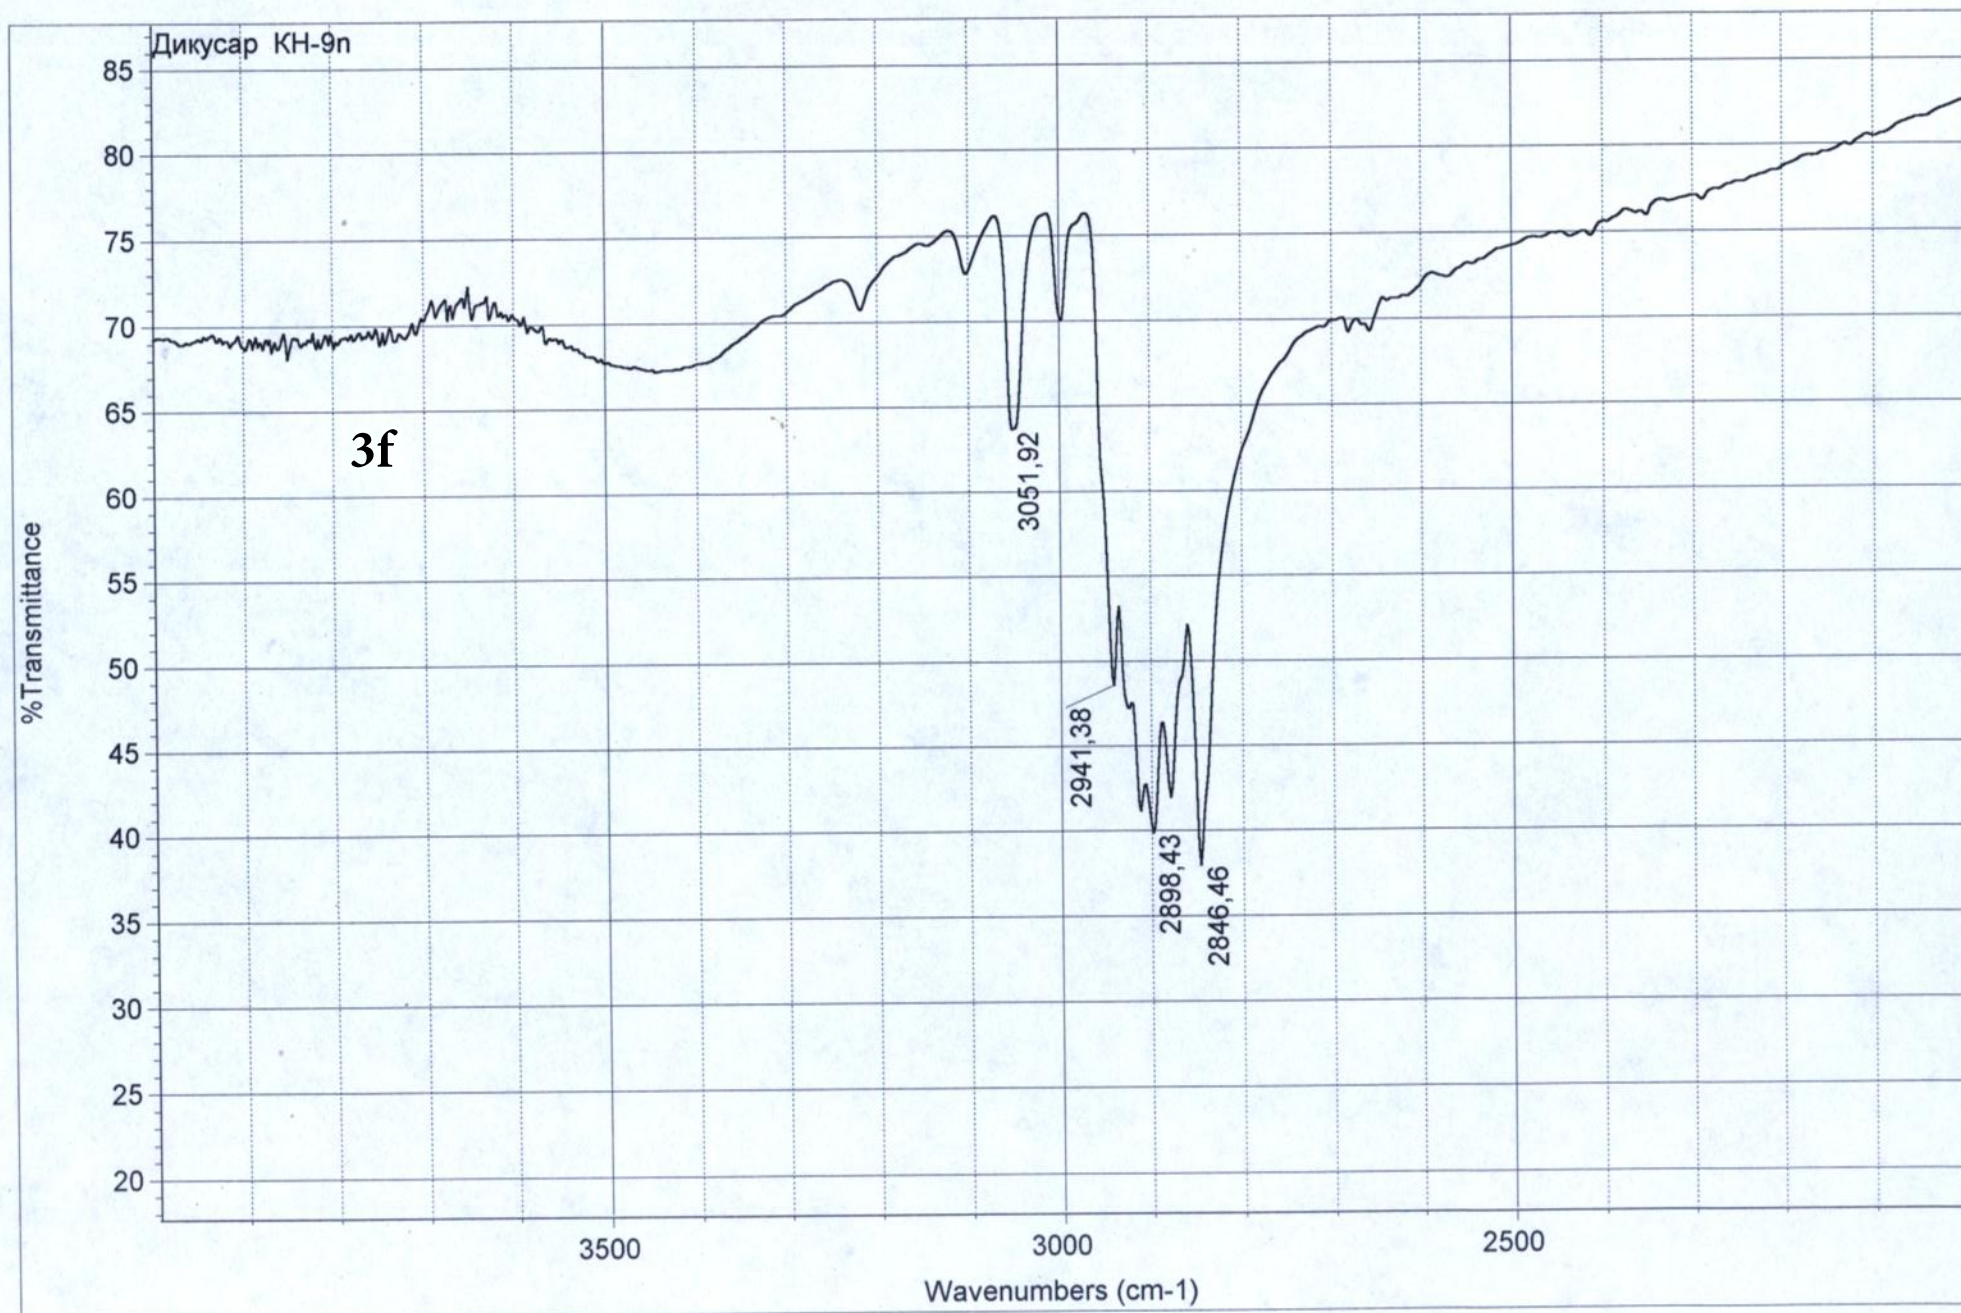

Supplement: Supplementary file 1 [file IR.pdf › IR.pdf]
